# Supplementary material
Source: PubMed Central journal article supplement (PMC5750849)

## Supplemental mass spec material

For differentially expressed proteins identified on the basis of single peptide, spectra corresponding to peptide sequences were annotated using MaxQuant Viewer (version 1.2.2.5). All annotated spectra were indicated below.

Source: mousePGCfemale-TMT6plex-group2-240ug-205min-3-4  
Scannumber: 26986  
Protein: Eif1; Sui1; Sui1-rs1; mCG\_20540; RP23-39213.1-001; Eif1b; P48024; Q3UBT8; Q4V9T8; Q9CXU9  
Peptide Score: 134.21  
Method: ITMS; CID; 1

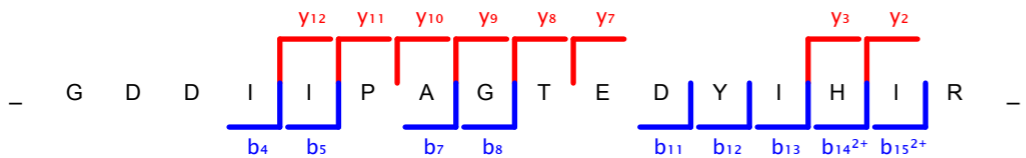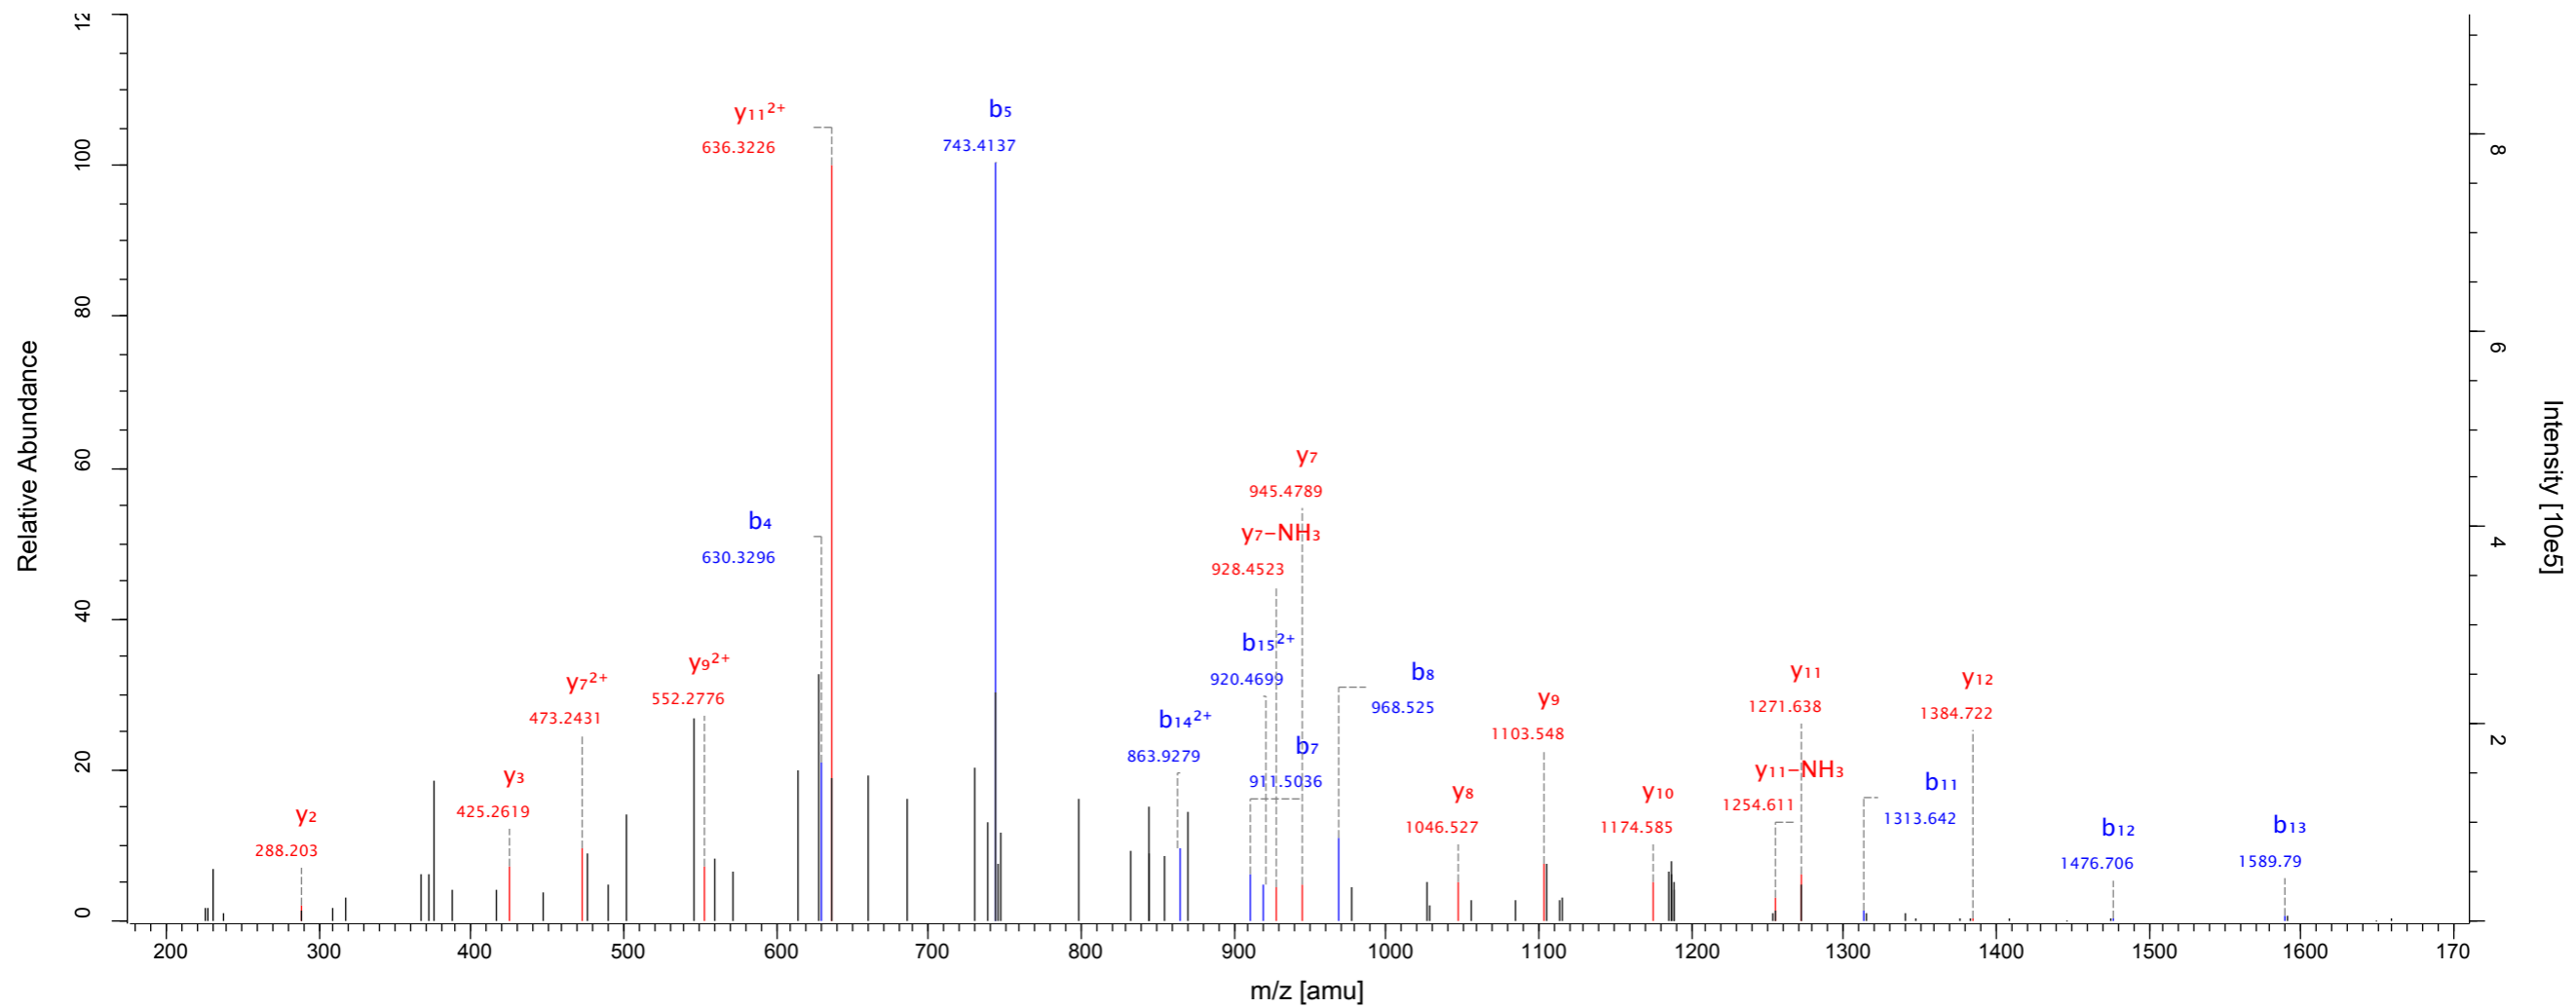

Source: mousePGCfemale-TMT6plex-group2-240ug-205min-7-8  
Scannumber: 1918  
Protein: Bb1; Leng4; Mboat7; Oact7; Q8CHK3  
Peptide Score: 124.12  
Method: ITMS; CID; 1

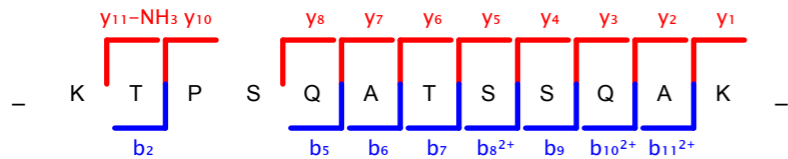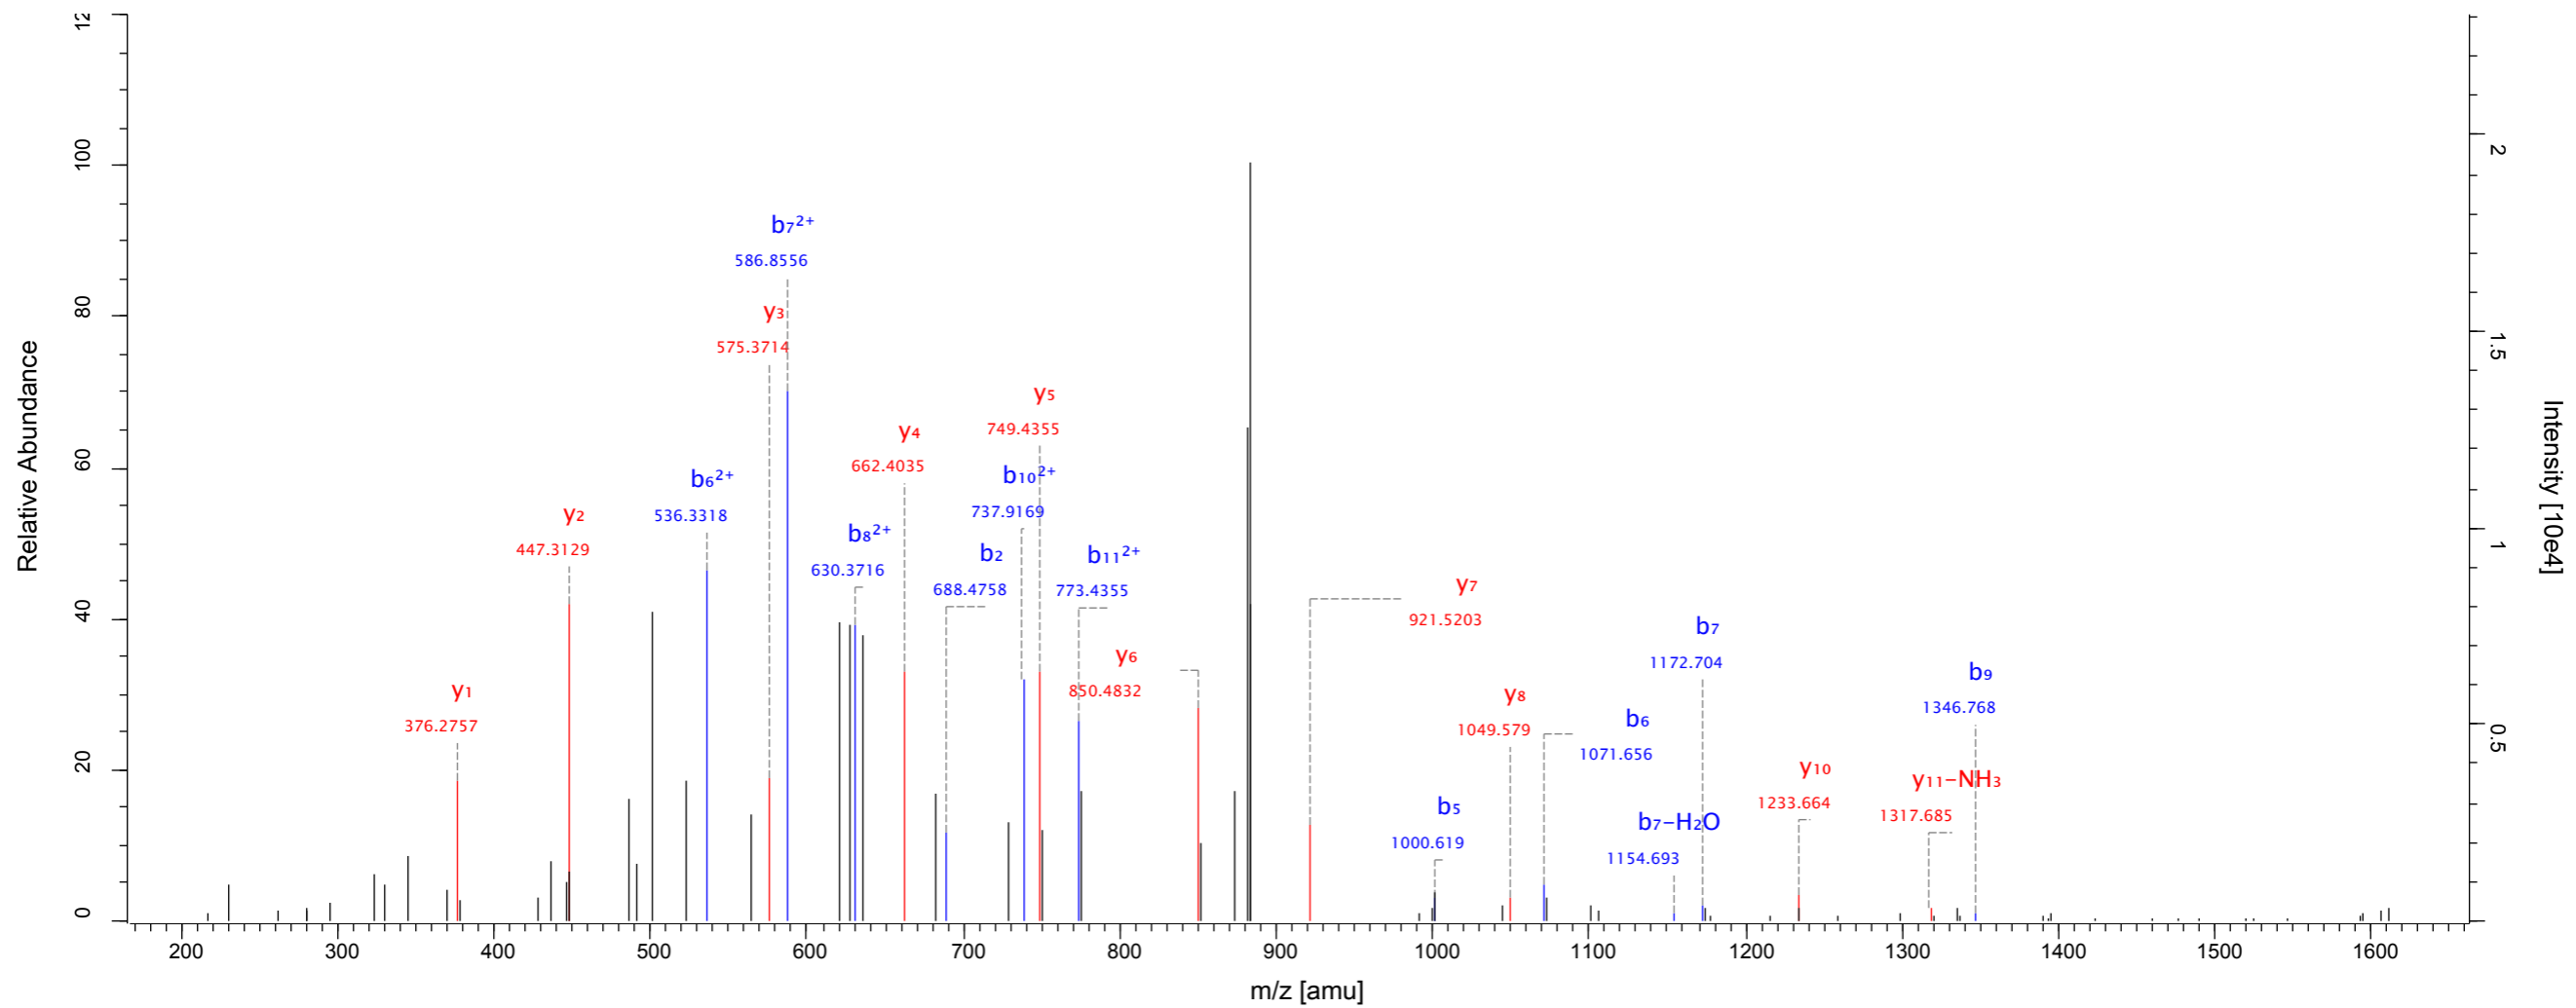

Source: mousePGCfemale-TMT6plex-group2-240ug-205min-7-8  
 Scannumber: 12292  
 Protein: Ss18; Ssxt; Syt; Ss18; Ss18; Ss18; Ss18; Q62280; Q3TM96; Q8BJH8; Q6P1I1; Q8BJJ6; Q8VHA9; E9Q9S9; Q8VHB0; Q8BKL1; Q8VHA8; Q3U3G9  
 Peptide Score: 147.26  
 Method: ITMS; CID; 1

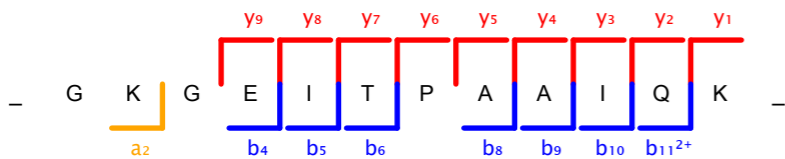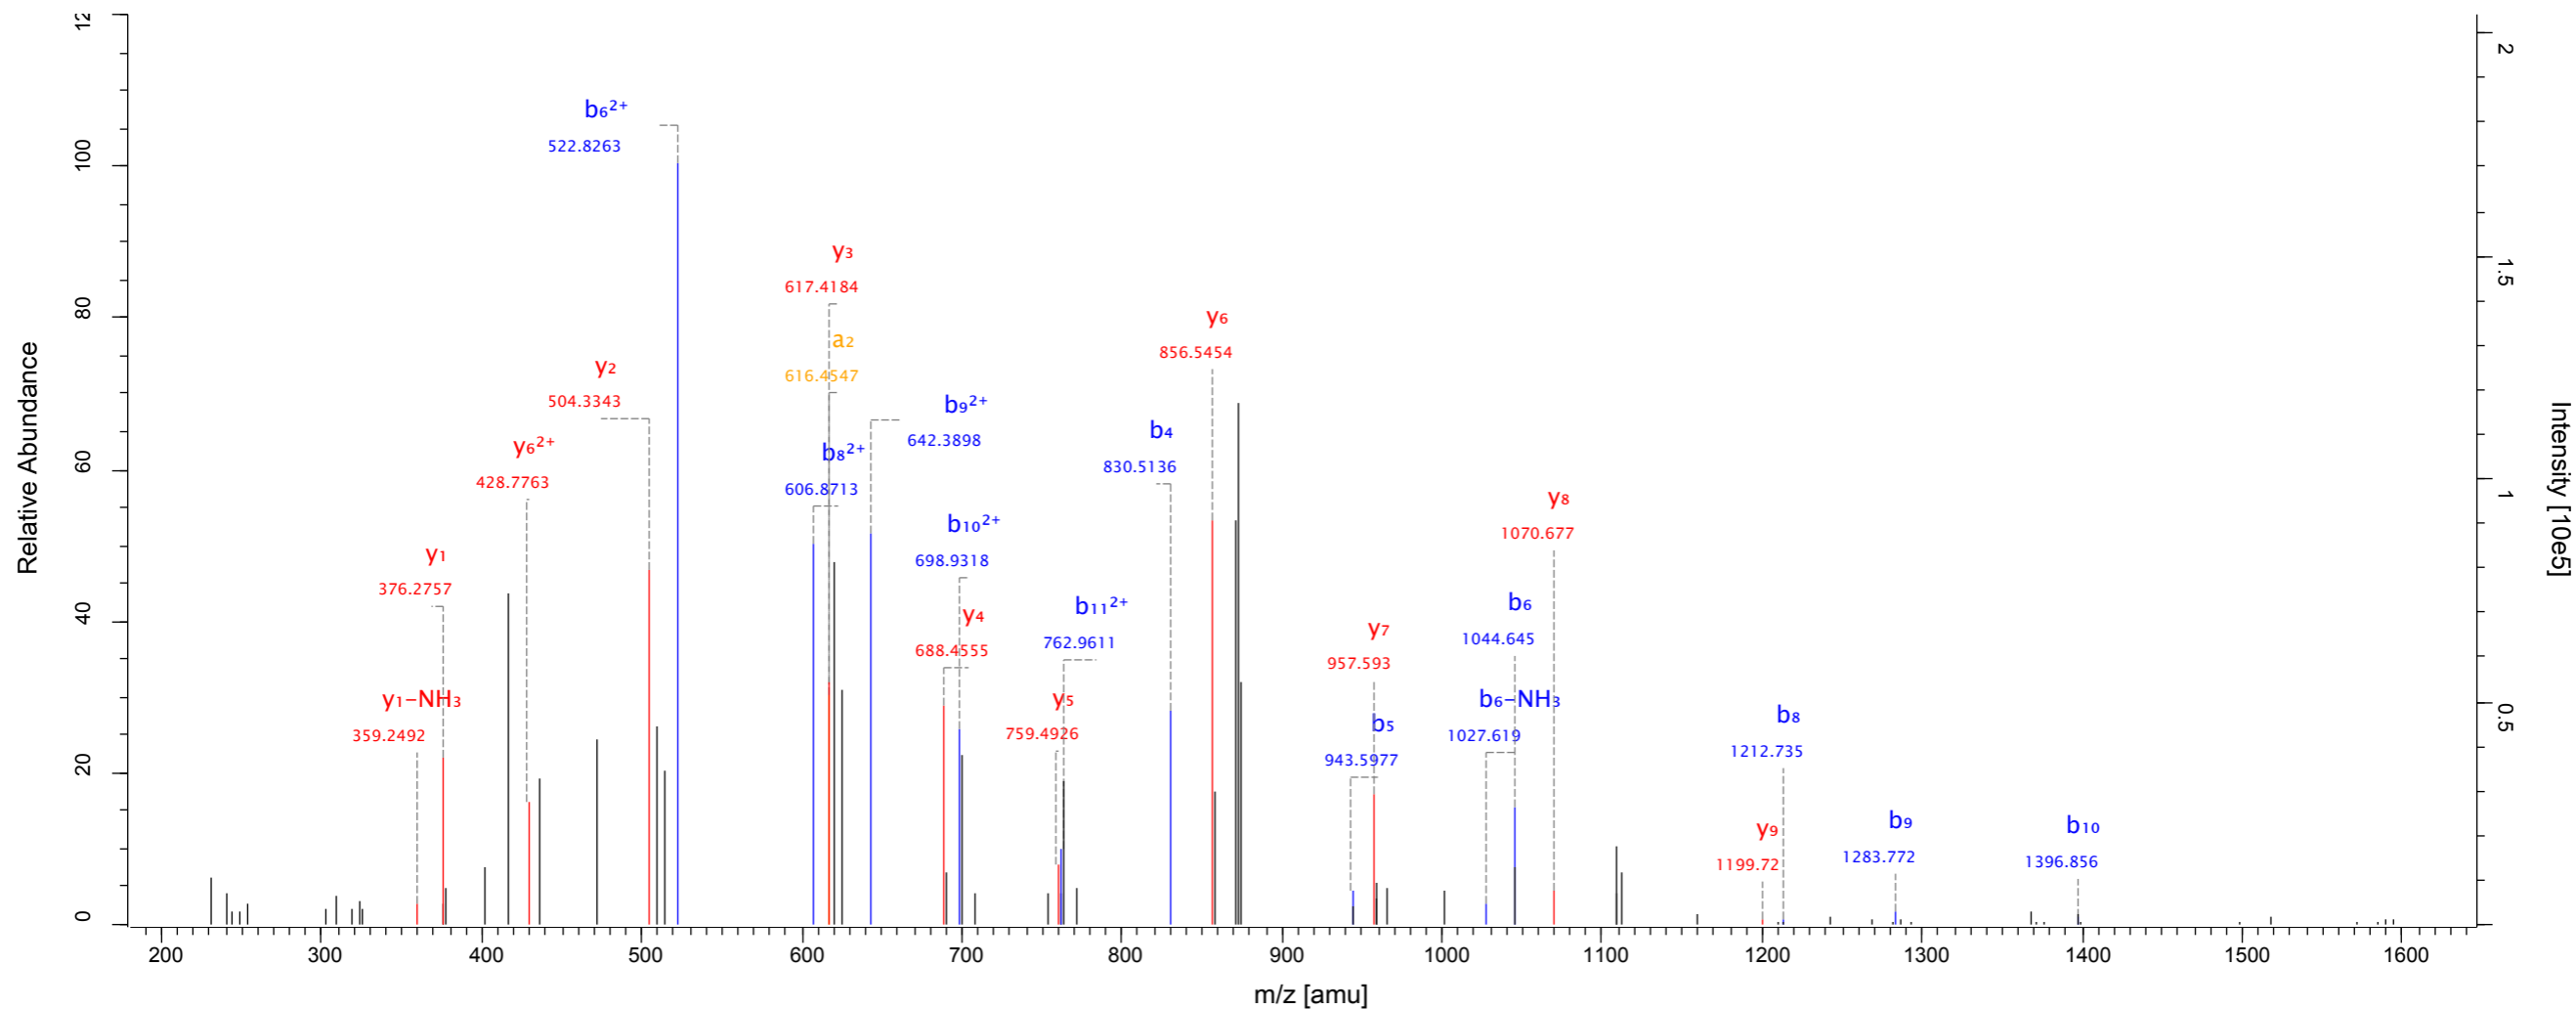

Source: mousePGCfemale-TMT6plex-group2-240ug-205min-7-8  
Scannumber: 31064  
Protein: Ssr3; mCG\_13448; Ssr3; Q9DCF9-1; Q9DCF9; Q3TS69; Q4FK79; Q9DCF9-2; Q9DCF9  
Peptide Score: 204.35  
Method: ITMS; CID; 1

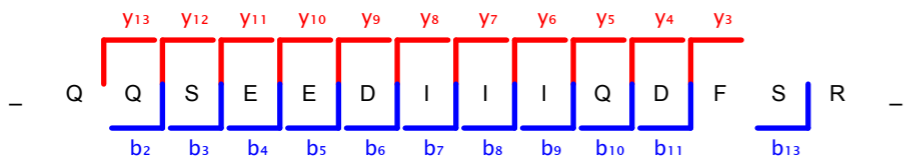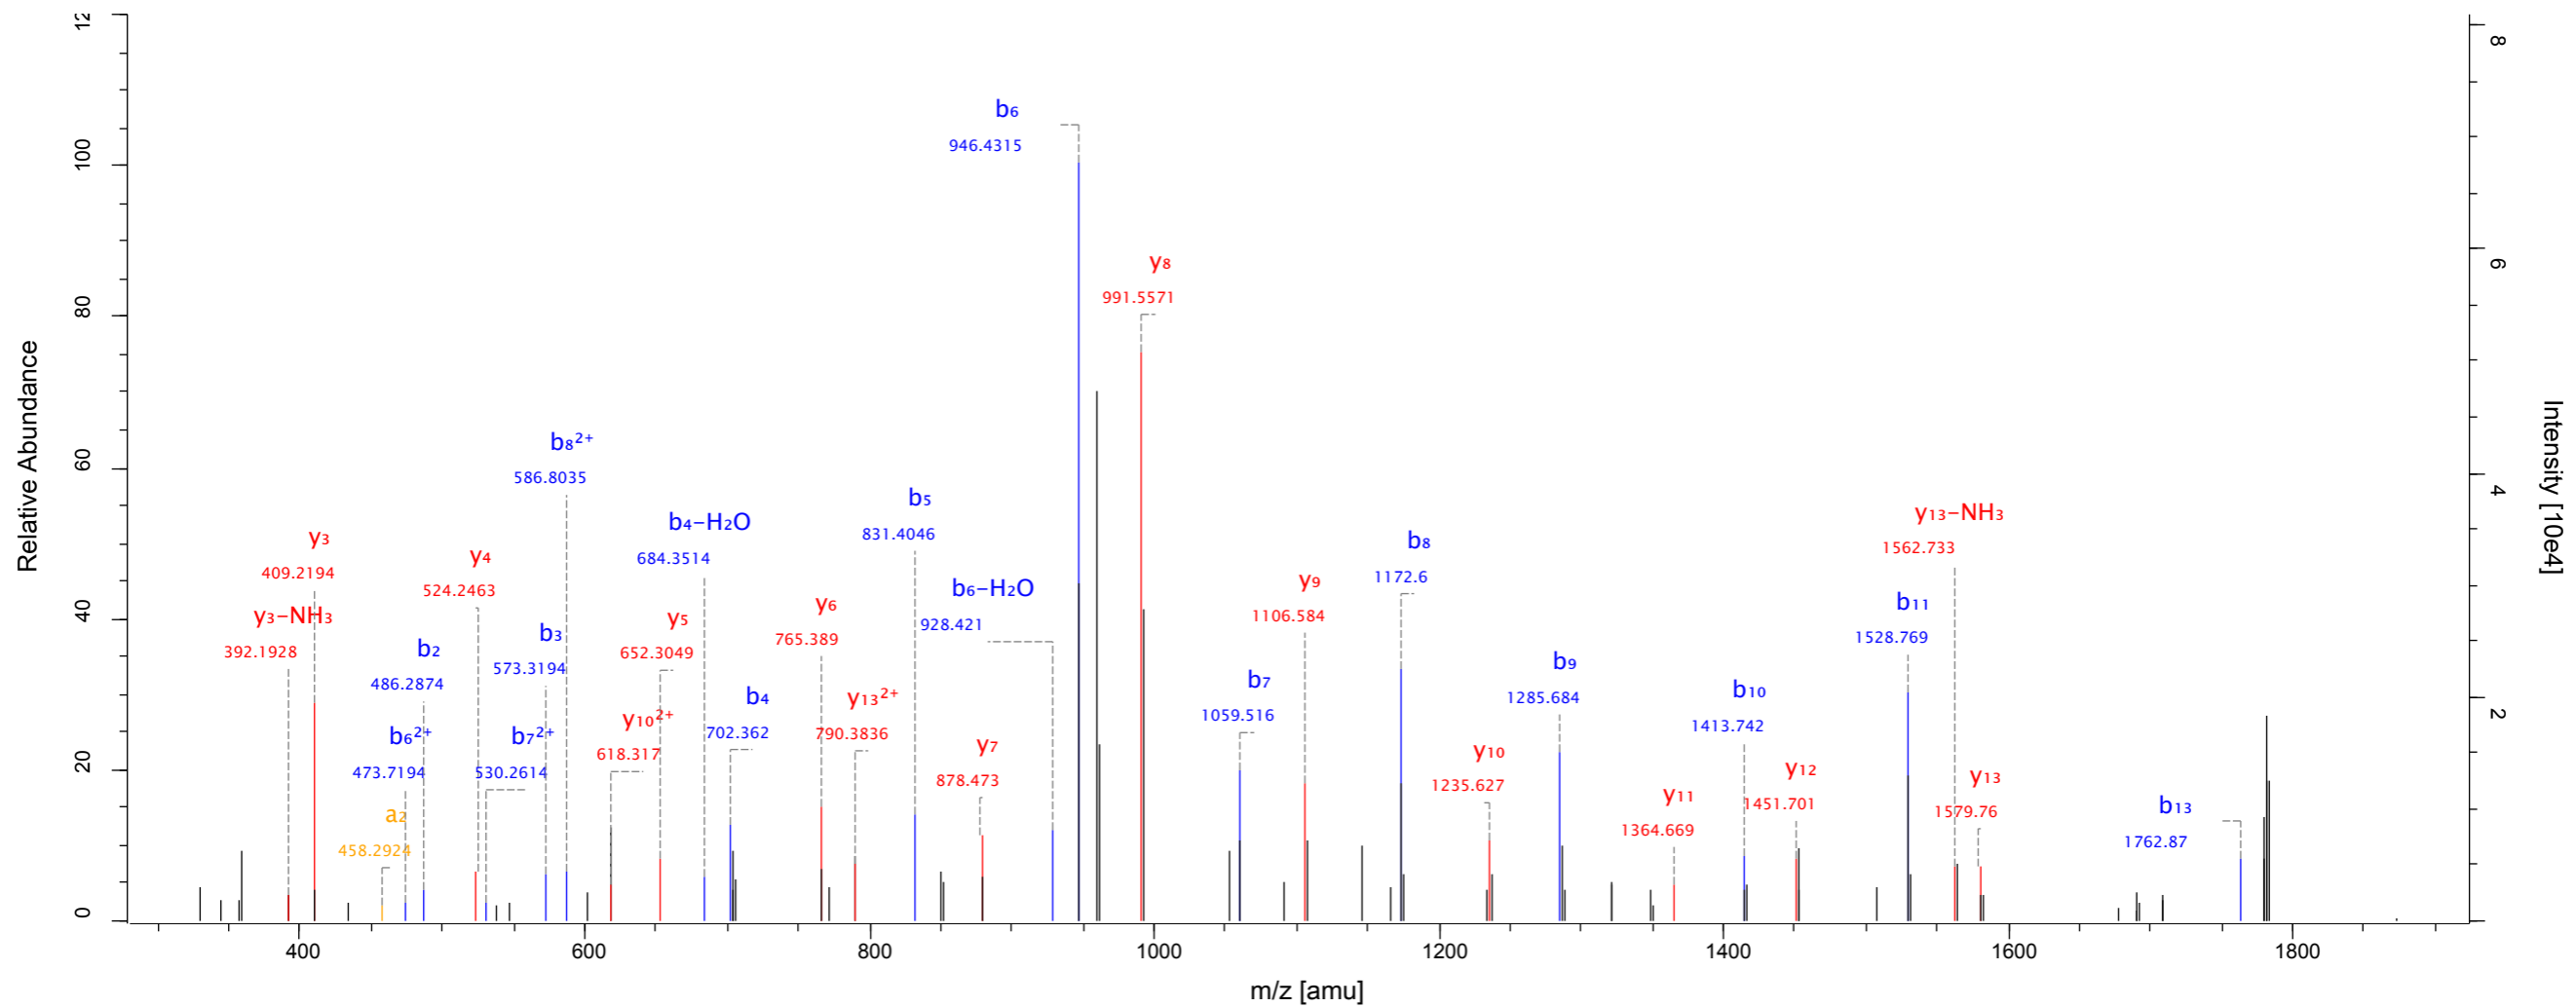

Source: mousePGCfemale-TMT6plex-group2-240ug-205min-7-8  
Scannumber: 34555  
Protein: Lzic; mCG\_17405; RP23-153G17.1-001; Q8K3C3; B1AS02  
Peptide Score: 173.32  
Method: ITMS; CID; 1

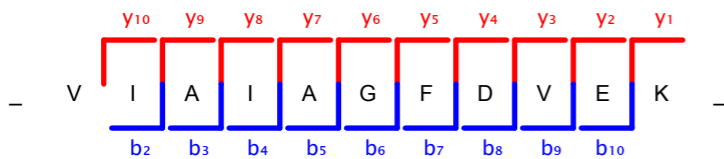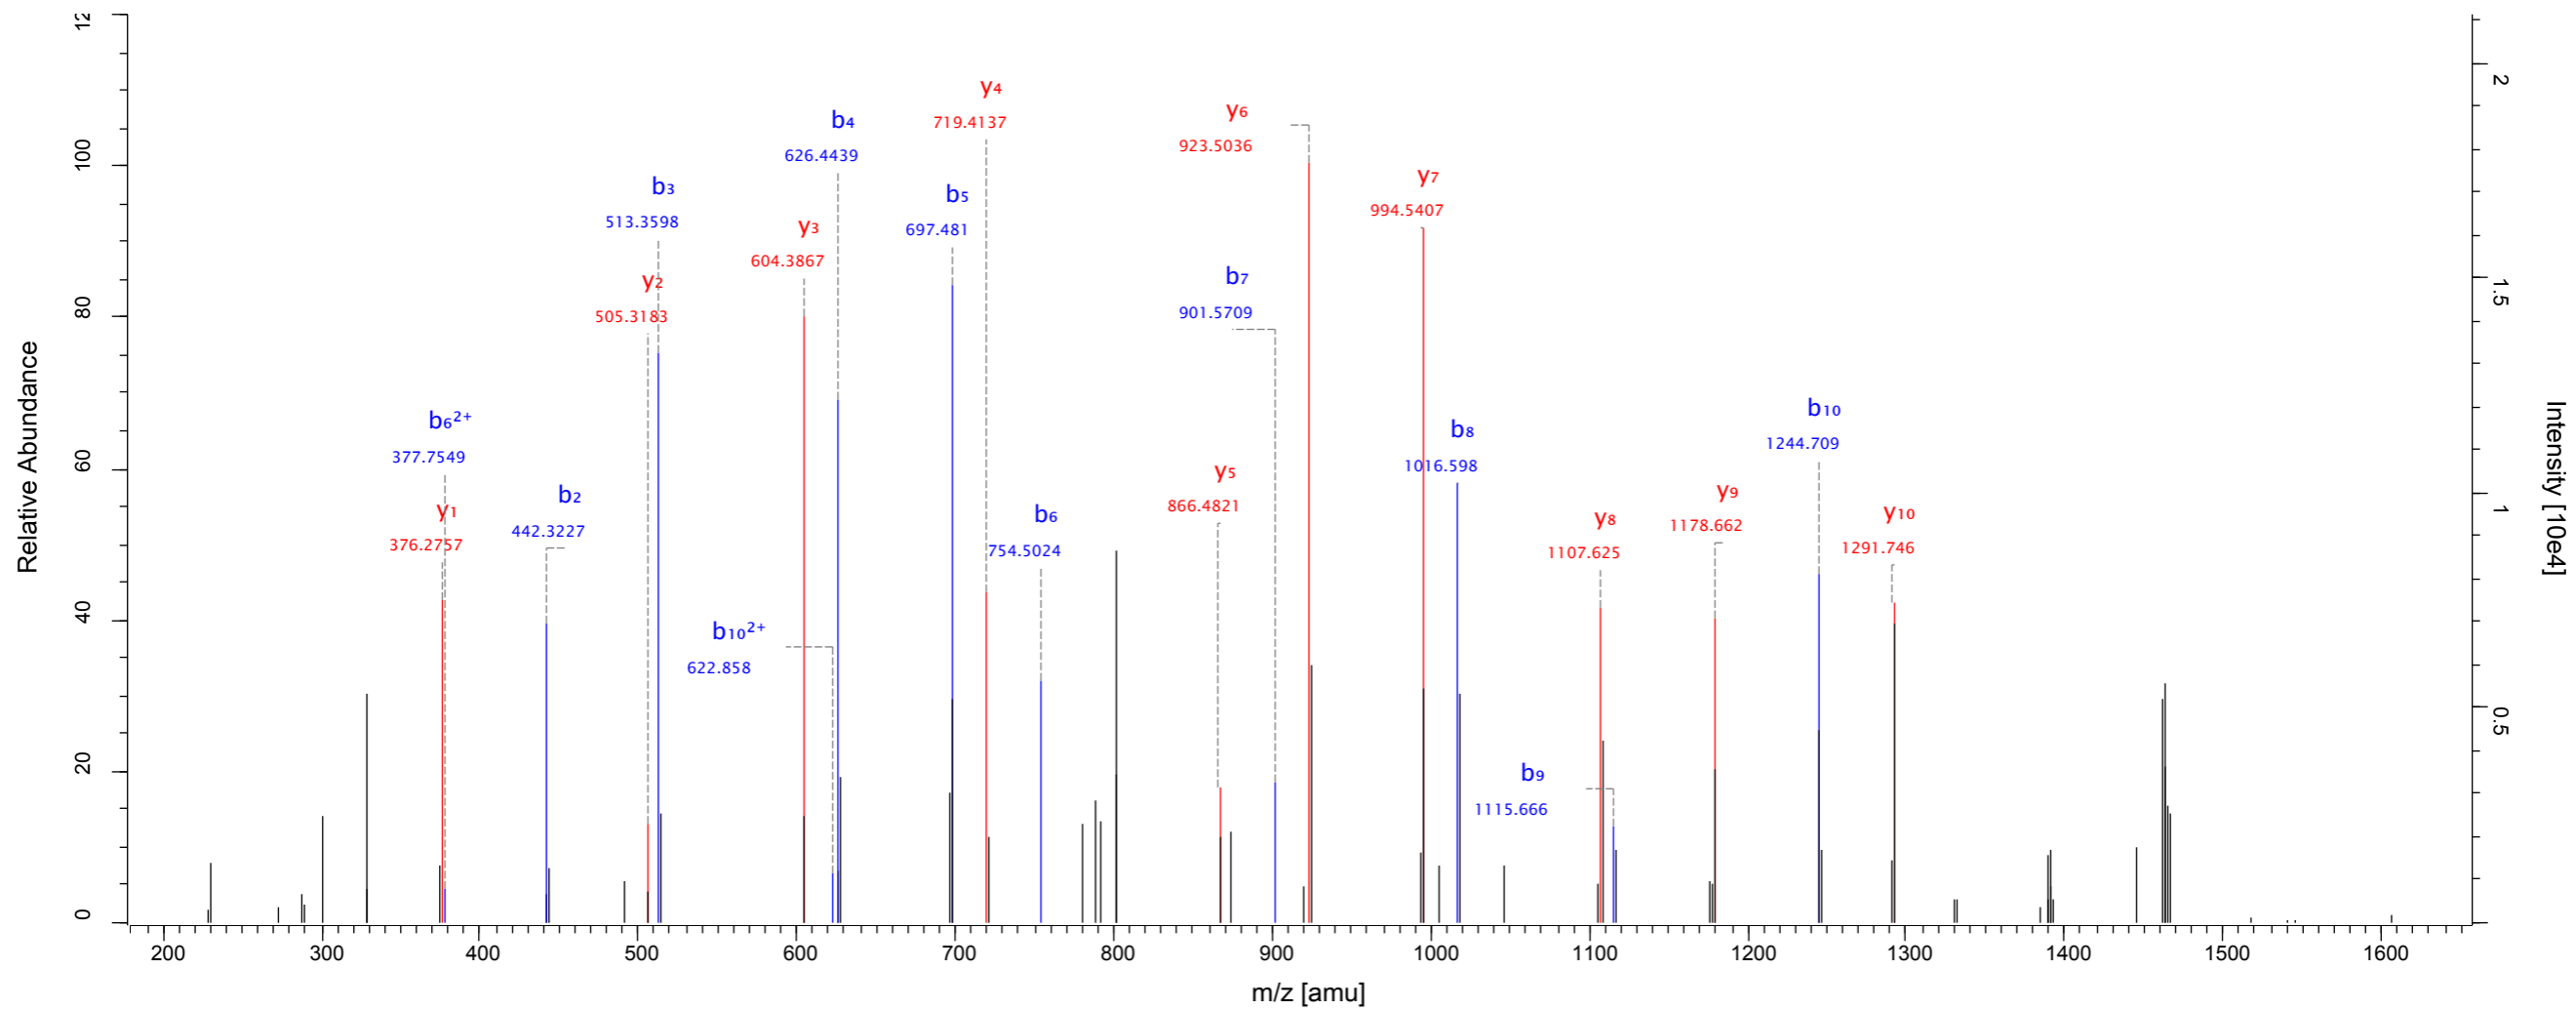

Source: mousePGCfemale-TMT6plex-group2-240ug-205min-9-10  
Scannumber: 23109  
Protein: Nedd8; Nedd-8; mCG\_22053; P29595; Q3TY05; Q3UI46  
Peptide Score: 124.12  
Method: ITMS; CID; 1

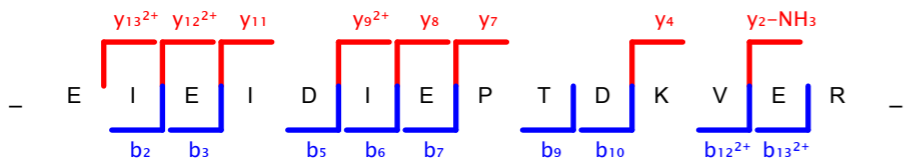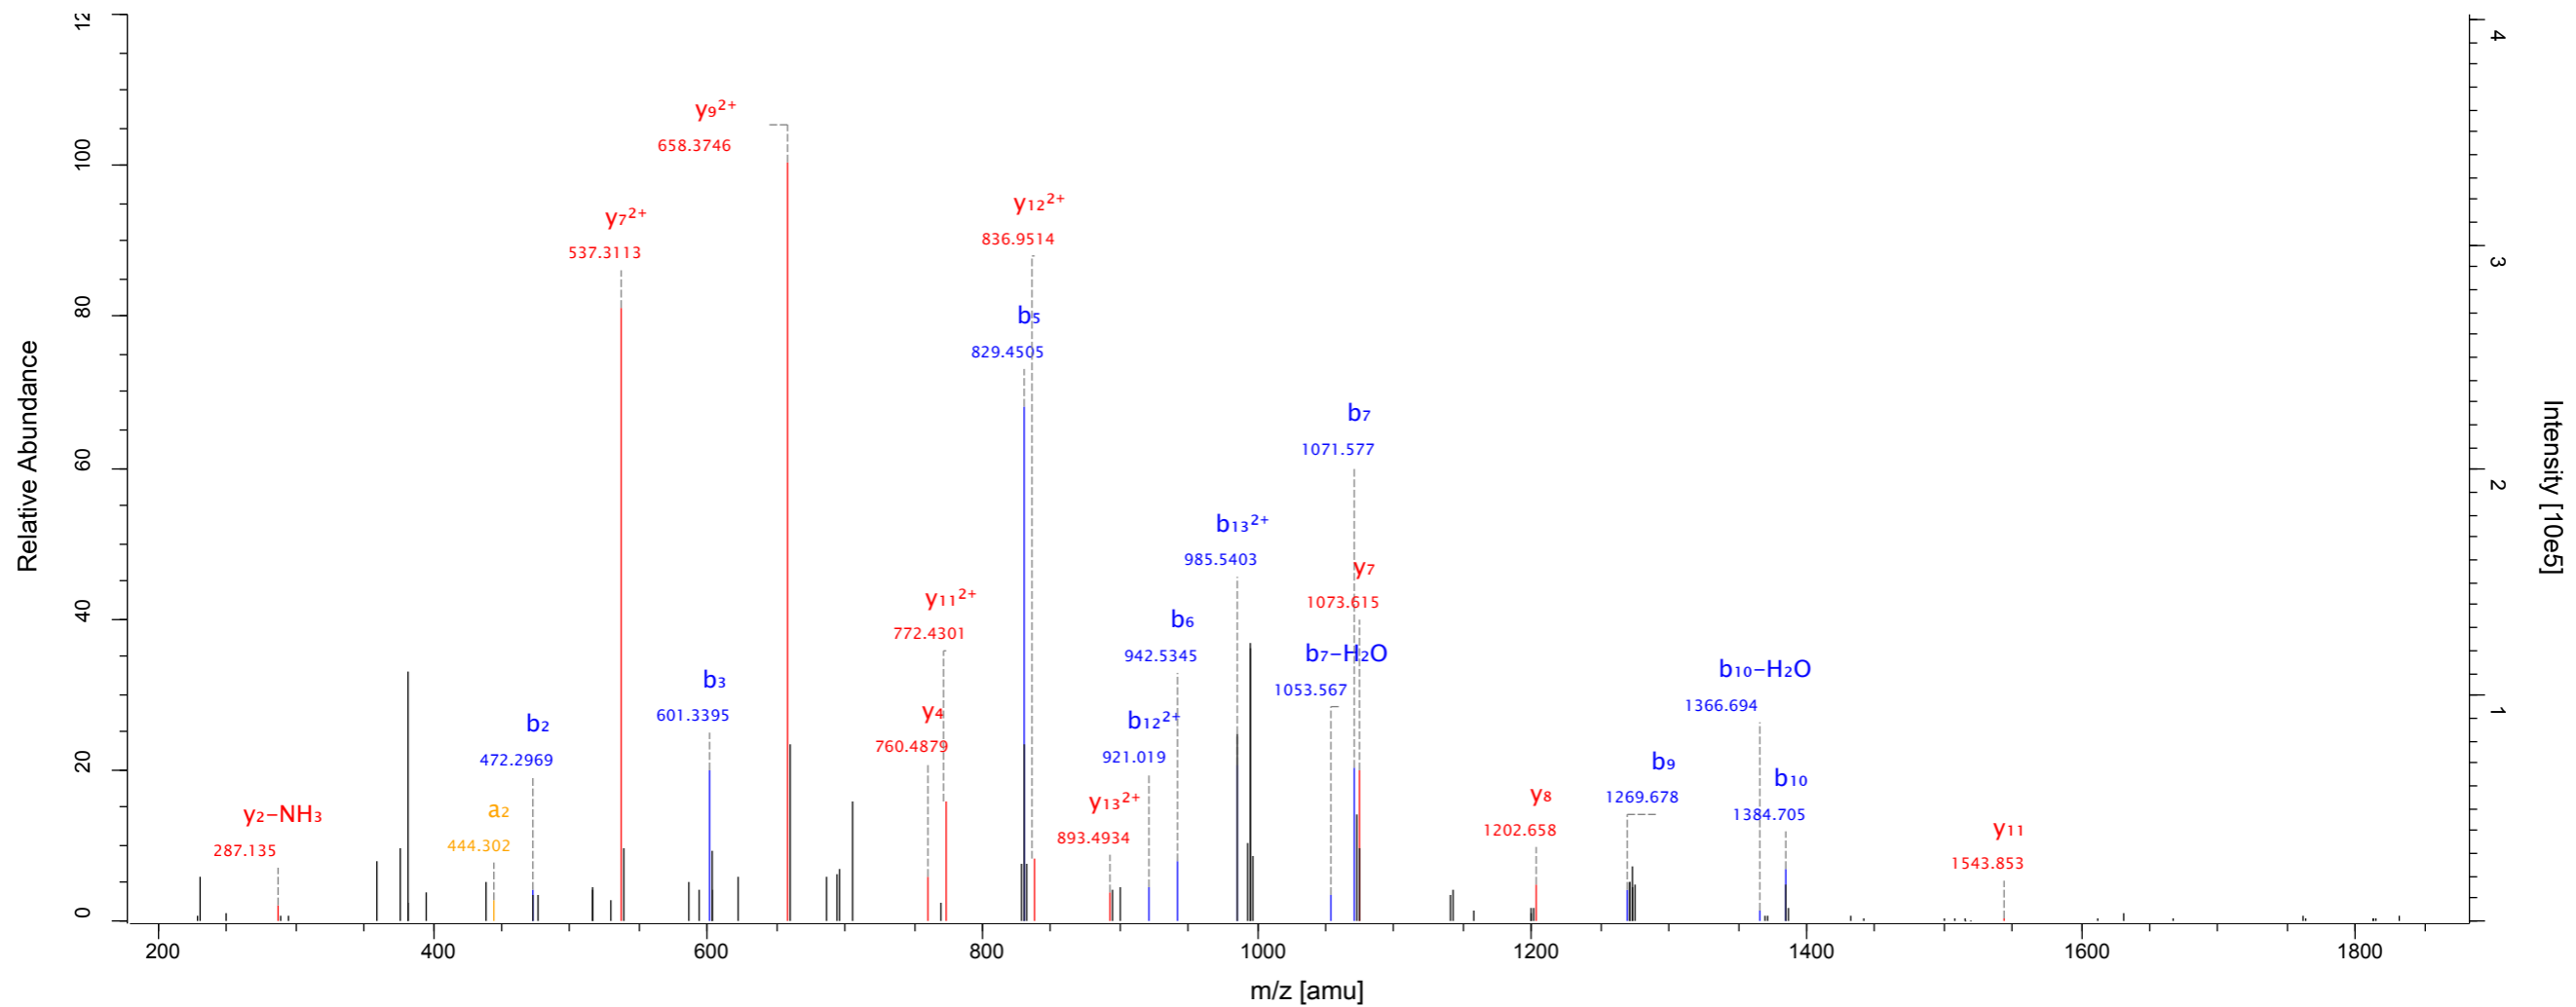

Source: mousePGCfemale-TMT6plex-group2-240ug-205min-9-10  
Scannumber: 37600  
Protein: Cirbp; Cirp; Cirbp; mCG\_13416; Cirbp; P60824; D3Z189; D3YU80  
Peptide Score: 160.84  
Method: ITMS; CID; 1

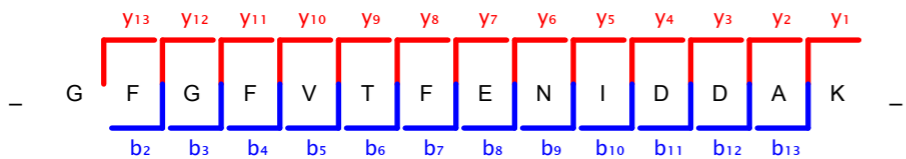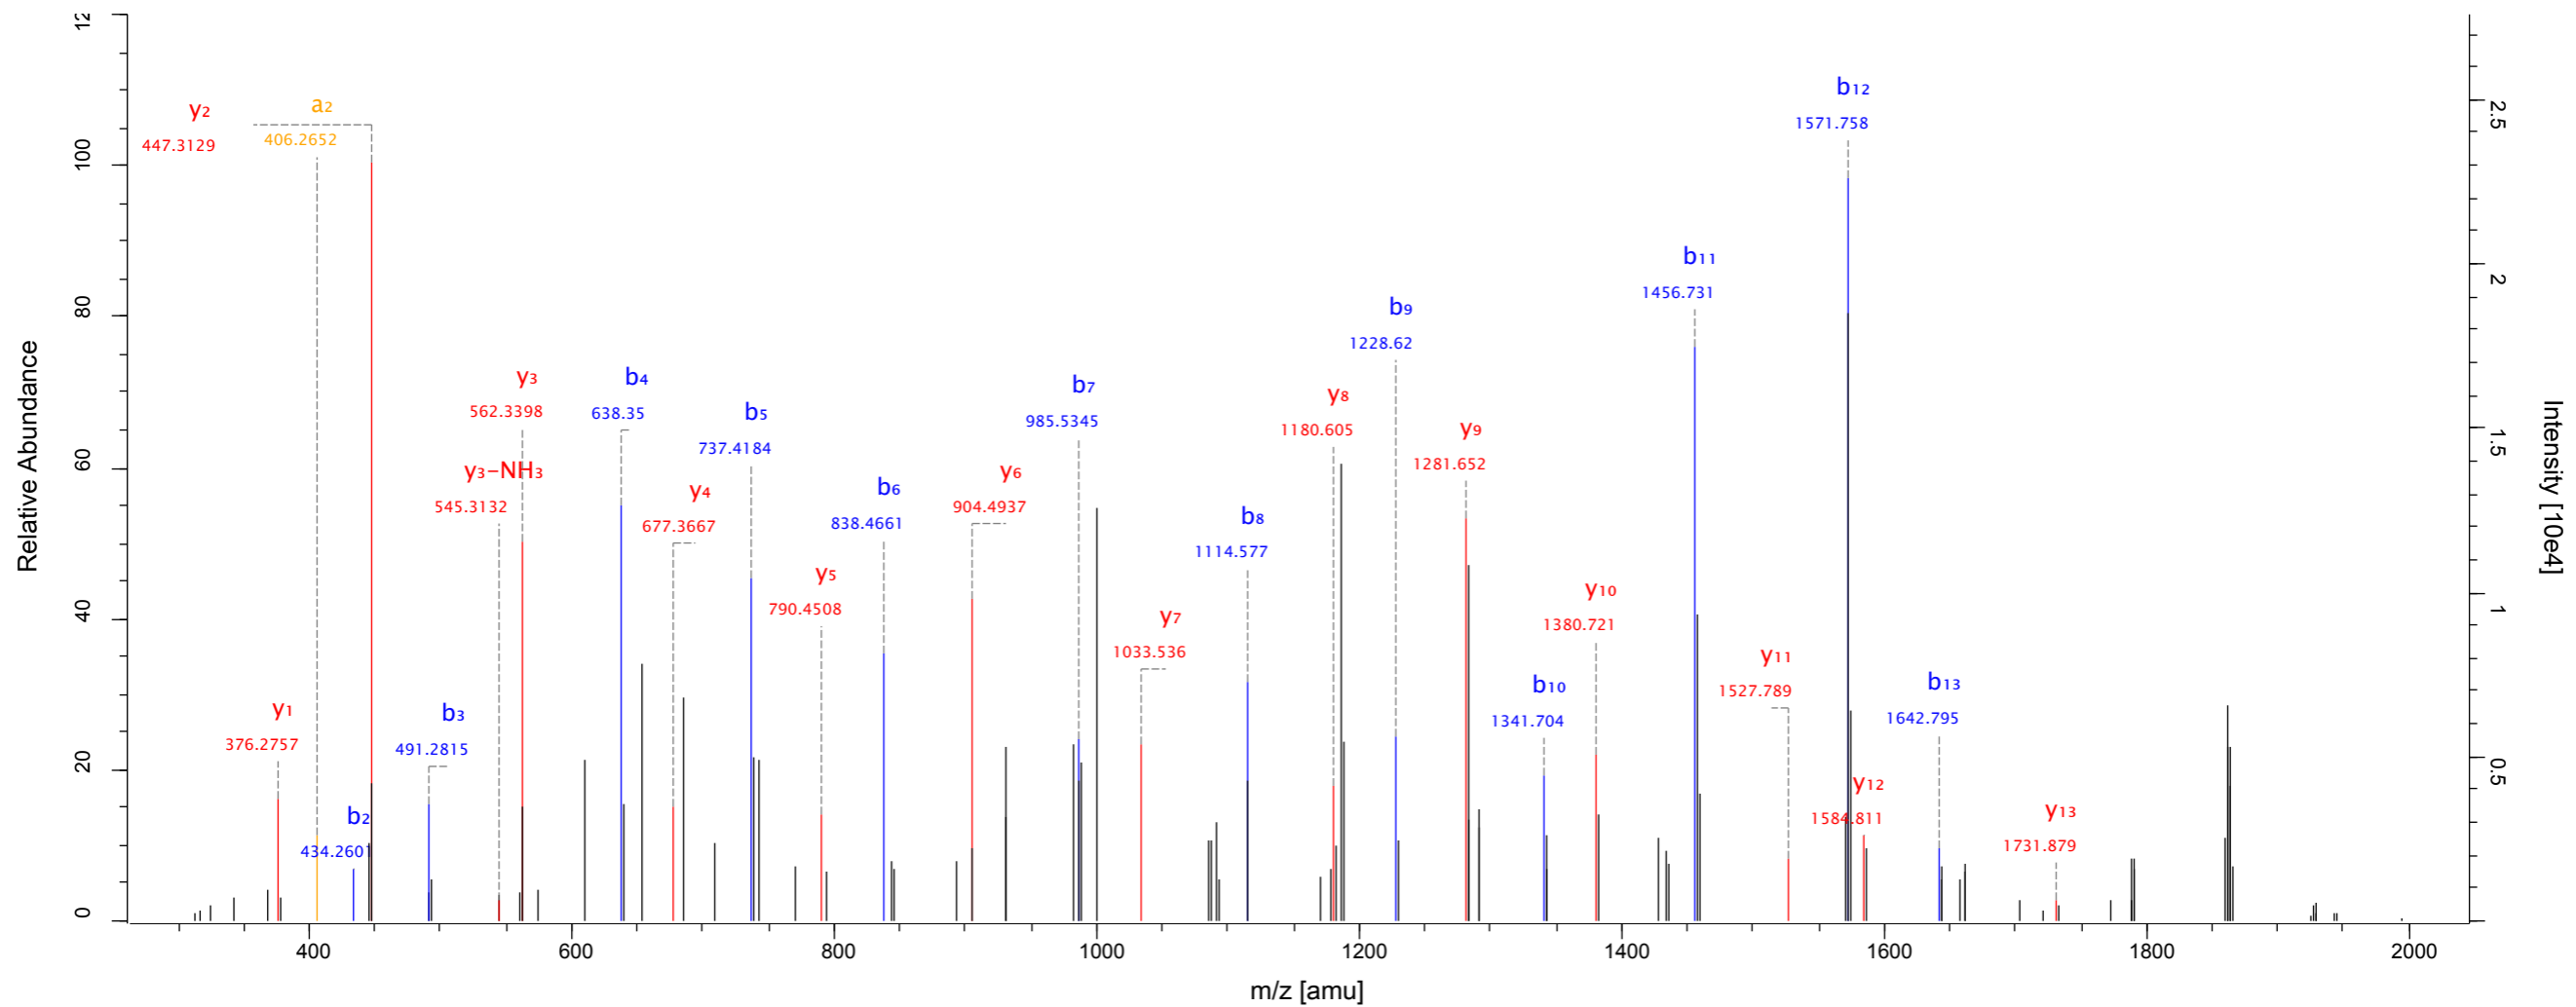



Source: mousePGCfemale-TMT6plex-group2-240ug-205min-9-10  
Scannumber: 38019  
Protein: Dim1; Txnl4; Txnl4a; Gm16286; mCG\_18172; Txnl4a; P83877; E9QJZ8; Q78JM7  
Peptide Score: 177.76  
Method: ITMS; CID; 1

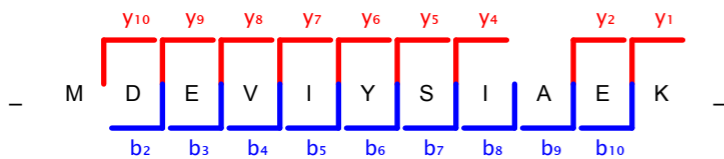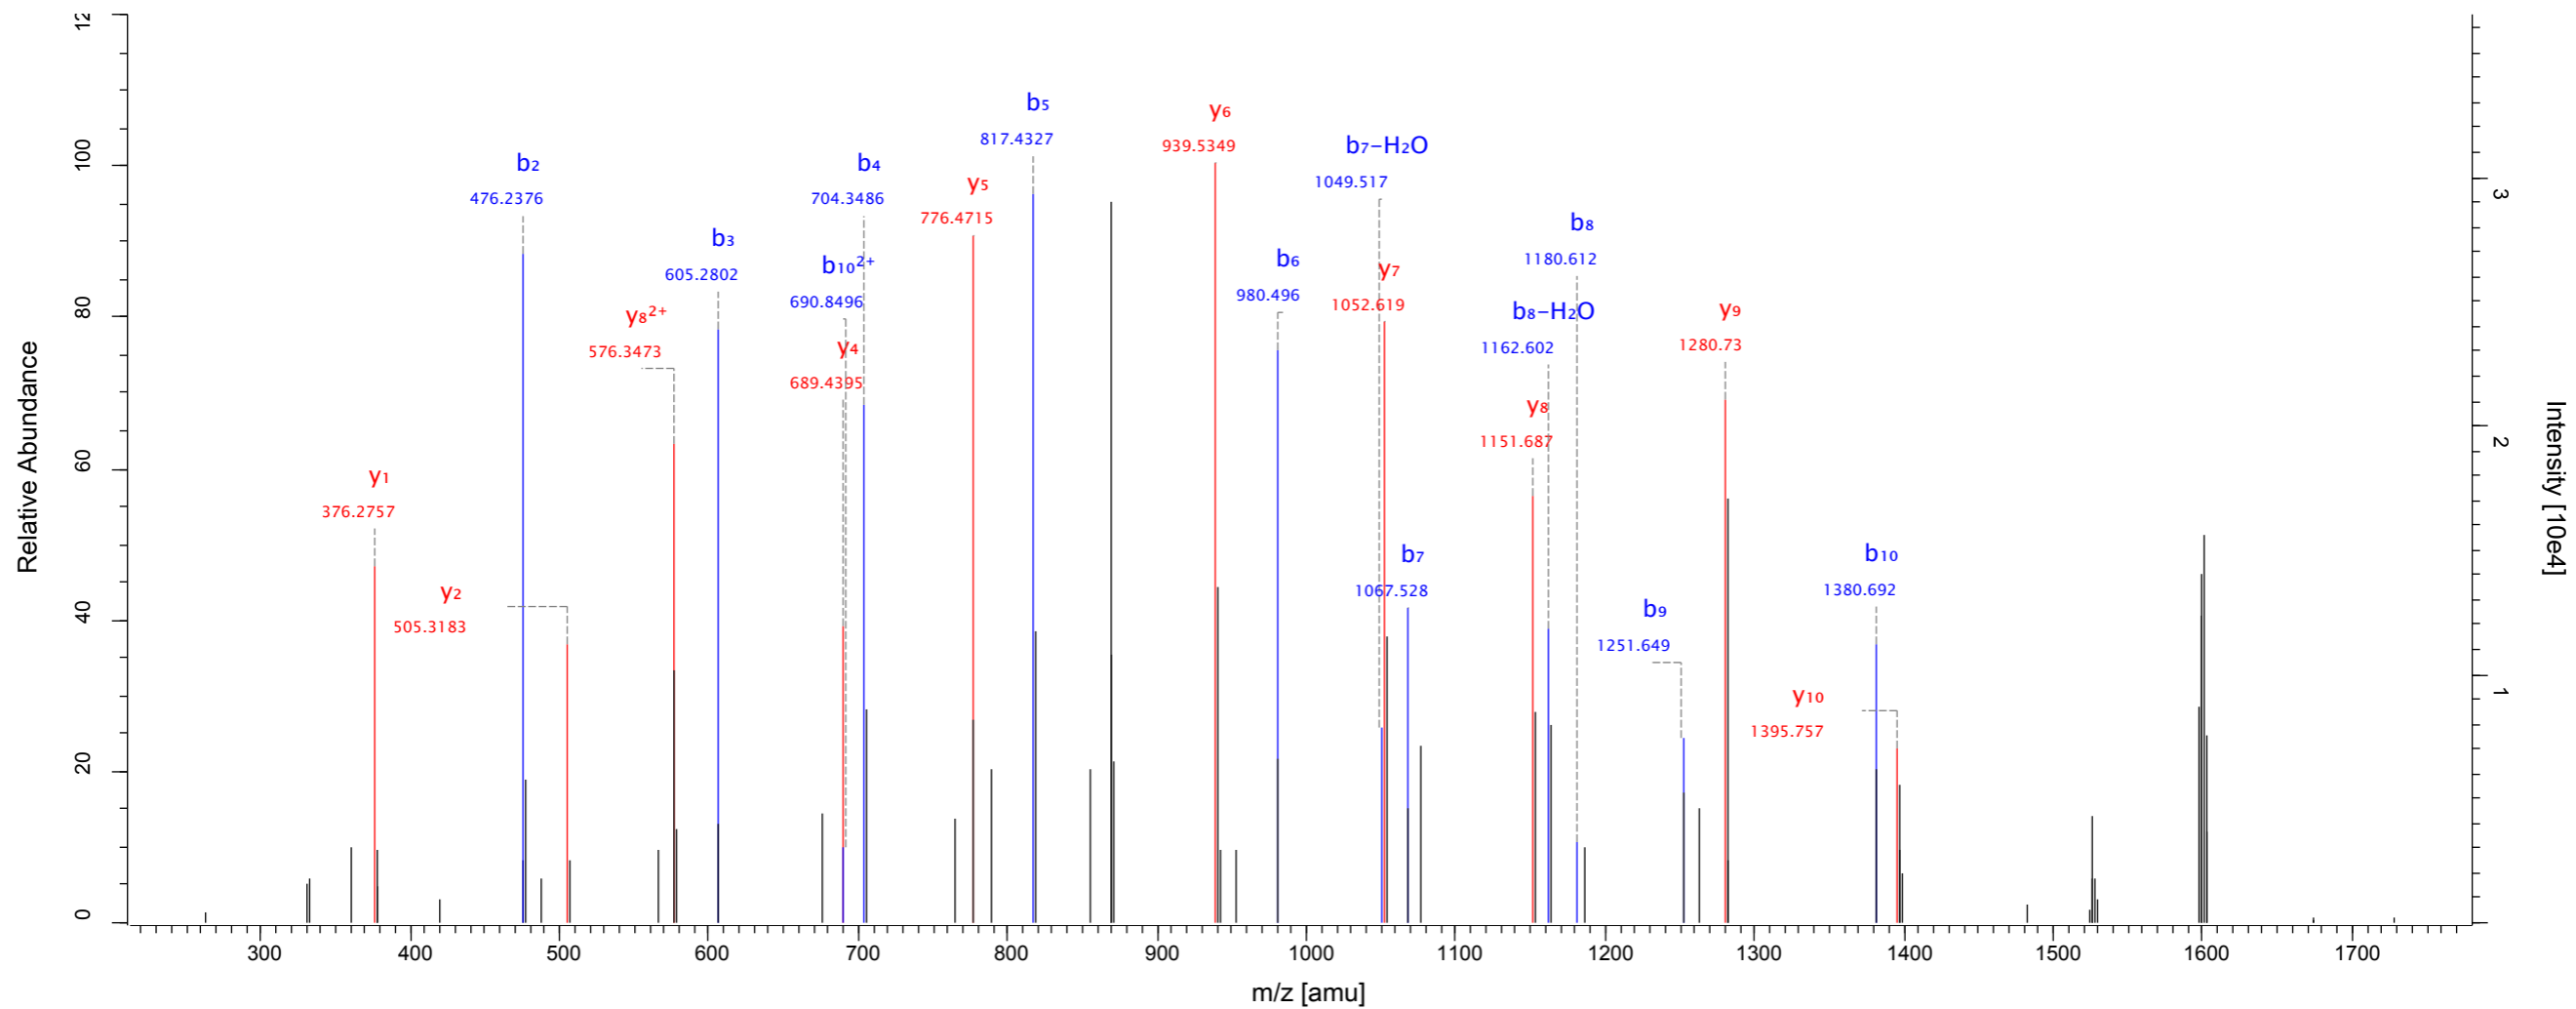

Source: mousePGCfemale-TMT6plex-group2-240ug-205min-11-12  
Scannumber: 13337  
Protein: Rtn3; Rtn3; Rtn3; Rtn3; Rtn3; Q9ES97-1; Q9ES97; Q9ES97-2; Q9ES97; Q8C6L4; Q9ES97-5; Q9ES97; Q9ES97-4; Q9ES97; Q9ES97-3; Q9ES97  
Peptide Score: 117.52  
Method: ITMS; CID; 1

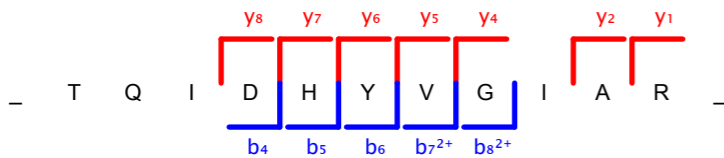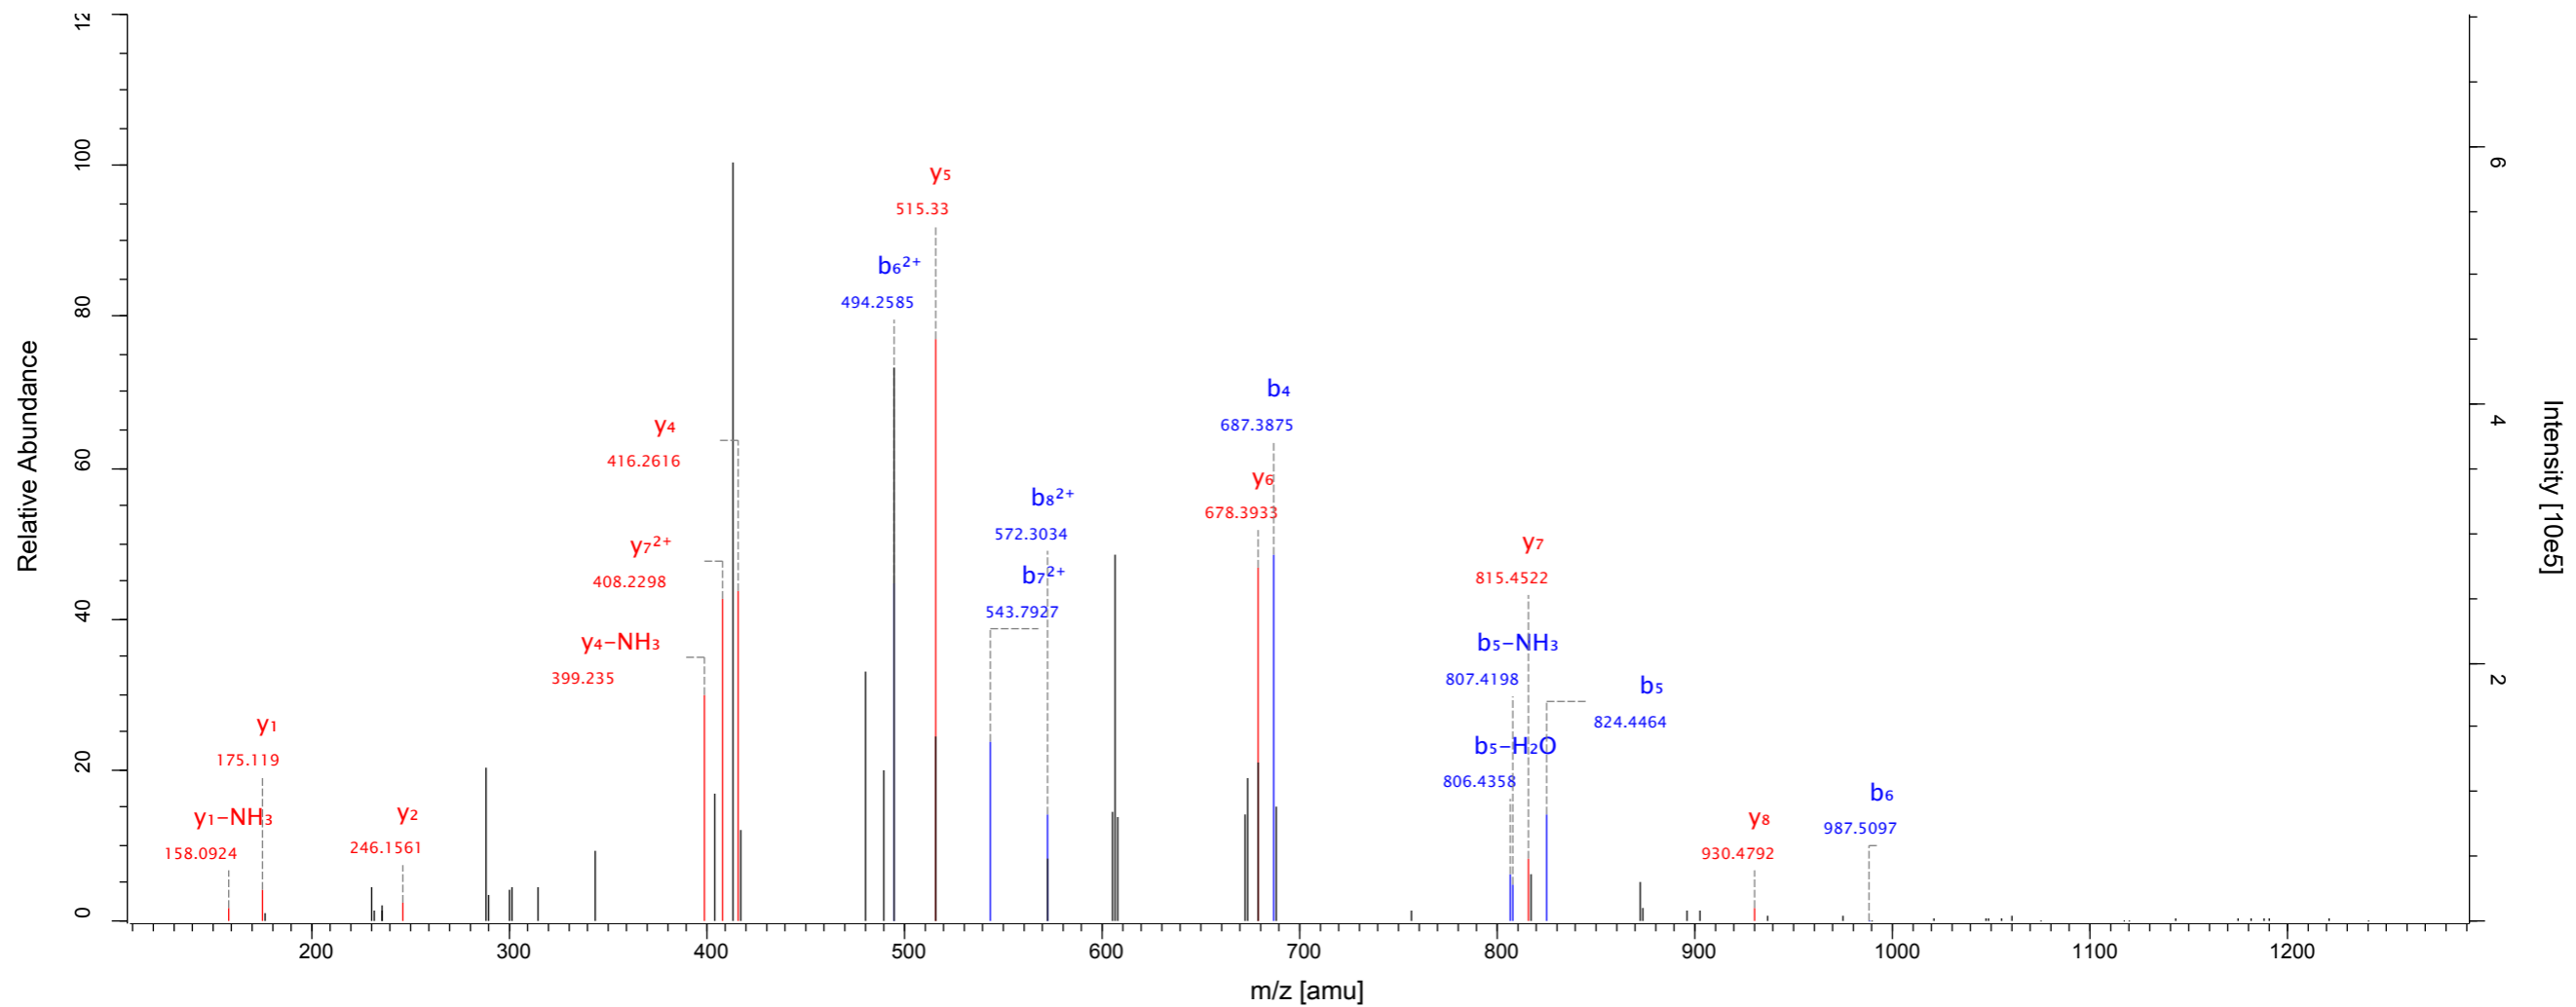

Source: mousePGCfemale-TMT6plex-group2-240ug-205min-11-12  
Scannumber: 13398  
Protein: Yip1a; Yipf5; Q9EQQ2  
Peptide Score: 116.37  
Method: ITMS; CID; 1

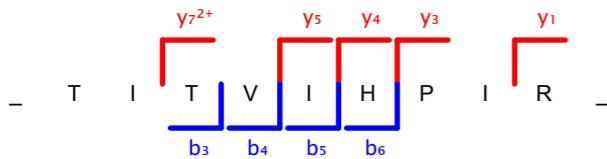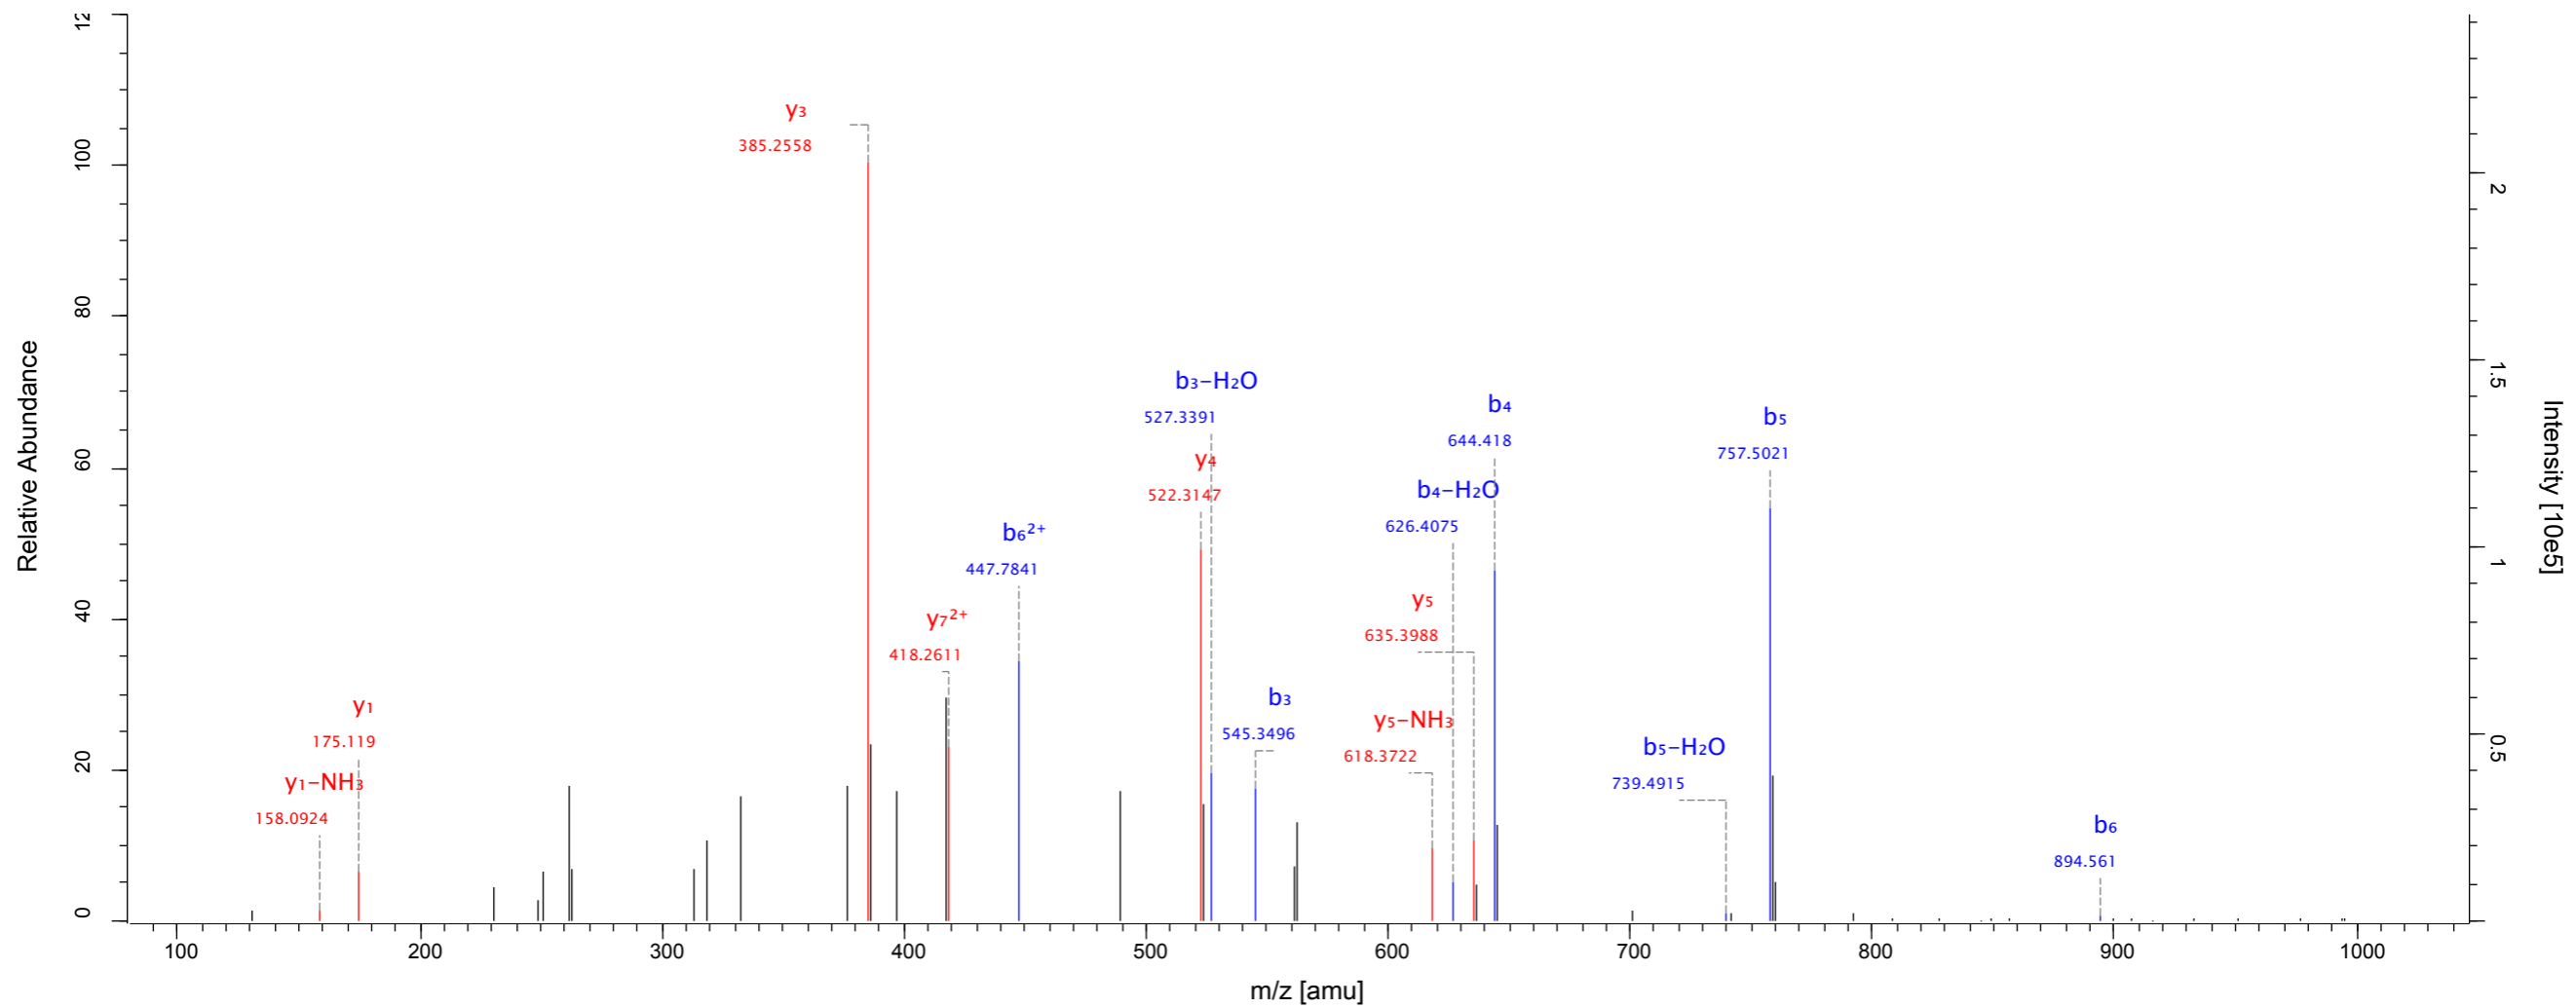

Source: mousePGCfemale-TMT6plex-group2-240ug-205min-11-12  
Scannumber: 39192  
Protein: Mfsd10; Tetran; Mfsd10; Mfsd10; Q9D2V8; D3YWD5; D3YYM9; D6RI23  
Peptide Score: 131.69  
Method: ITMS; CID; 1

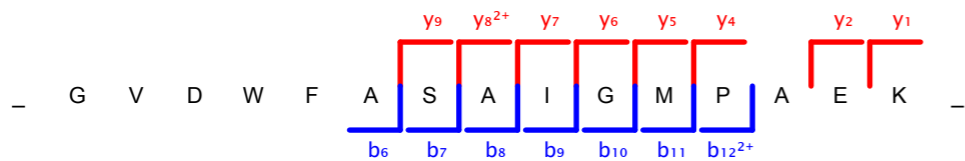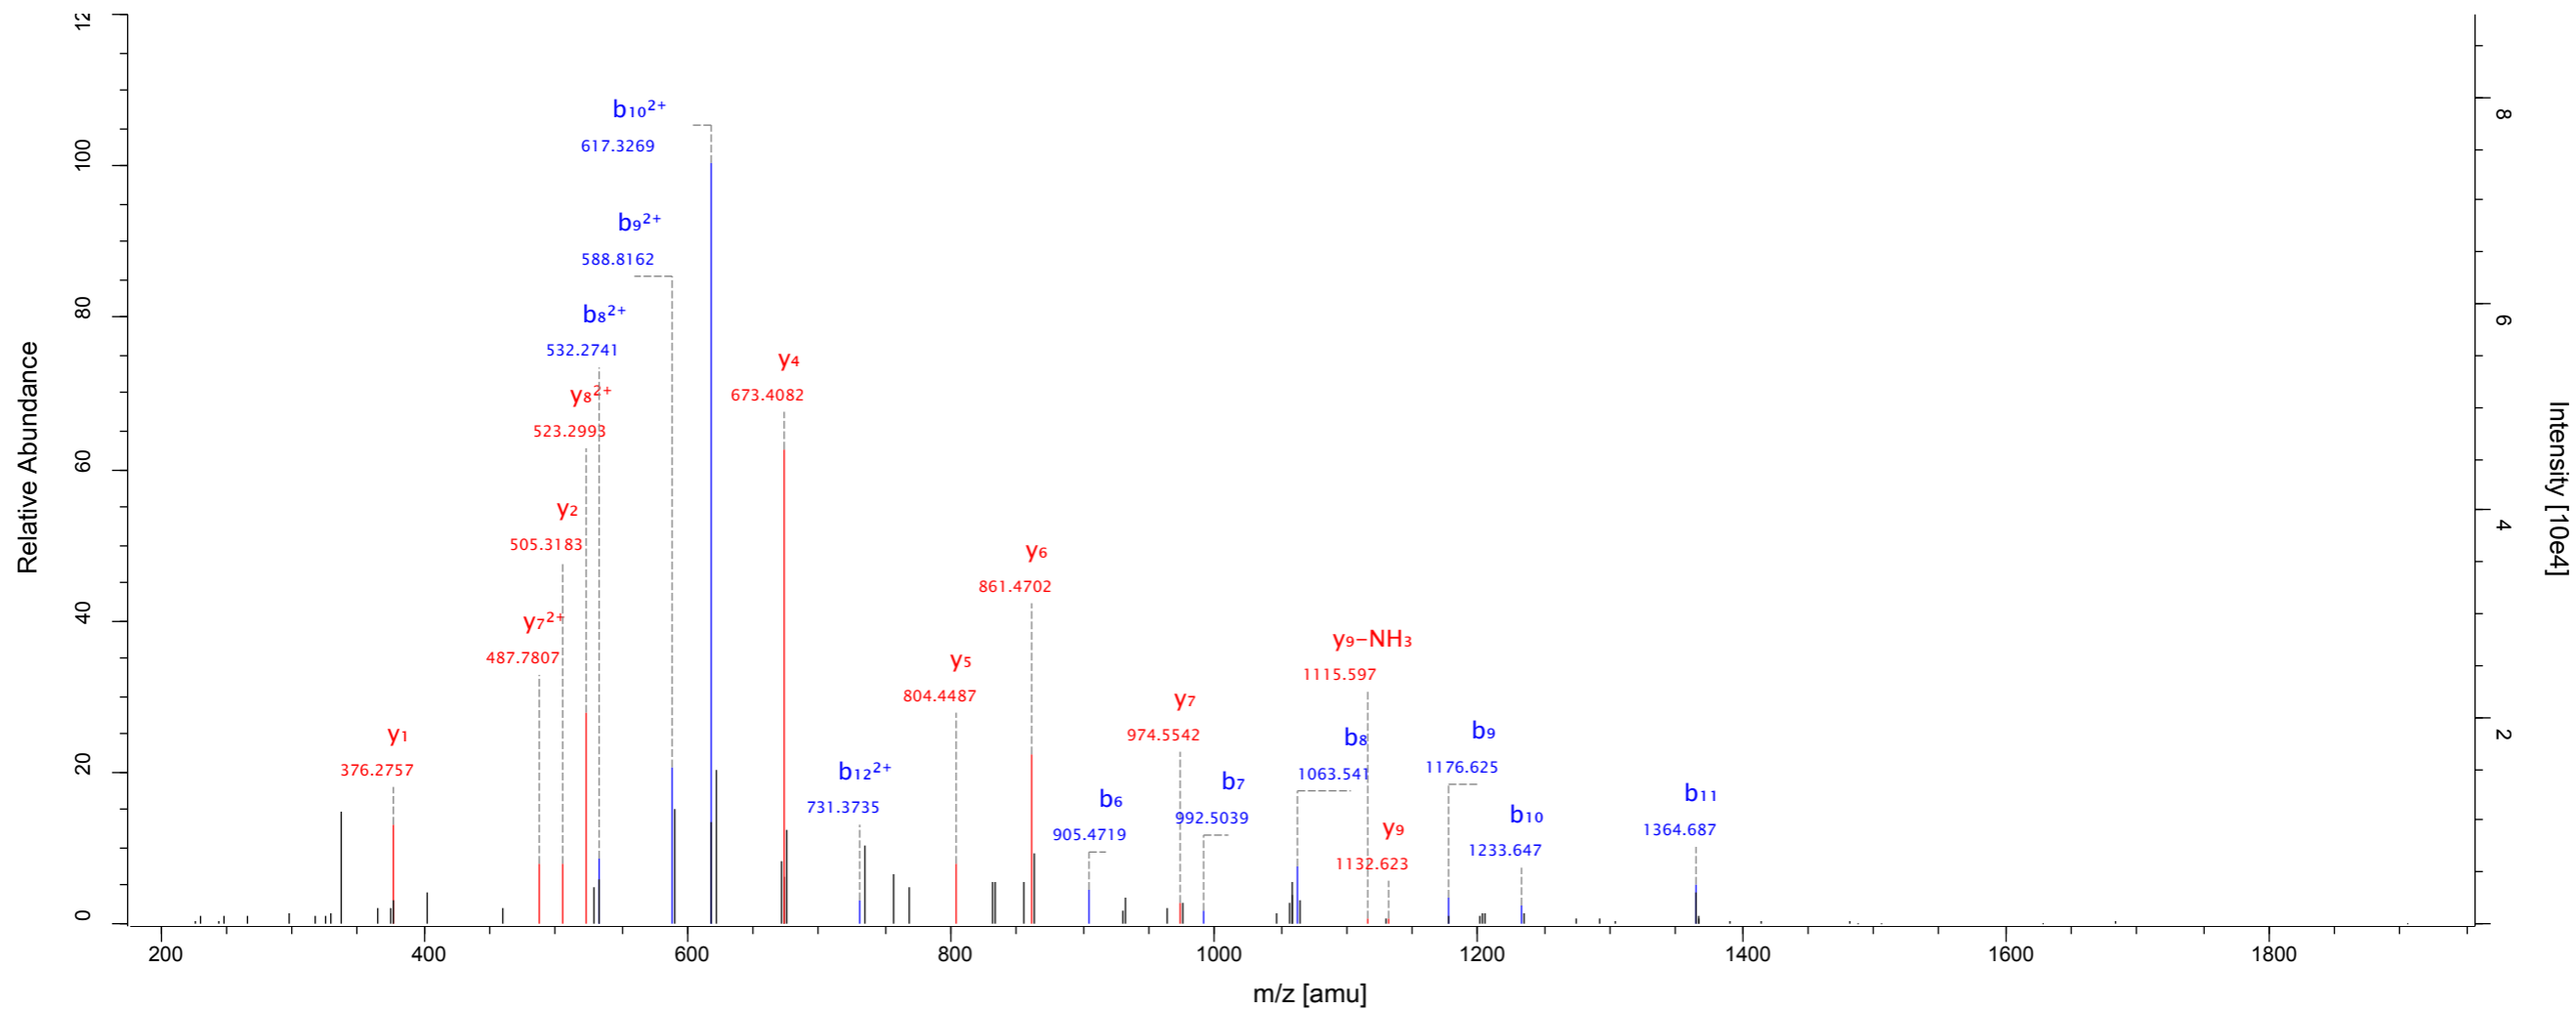

Source: mousePGCfemale-TMT6plex-group2-240ug-205min-11-12  
Scannumber: 39868  
Protein: Tex101; Q9JMI7; Q076U5  
Peptide Score: 129.84  
Method: ITMS; CID; 1

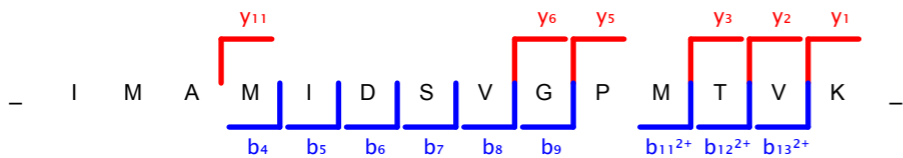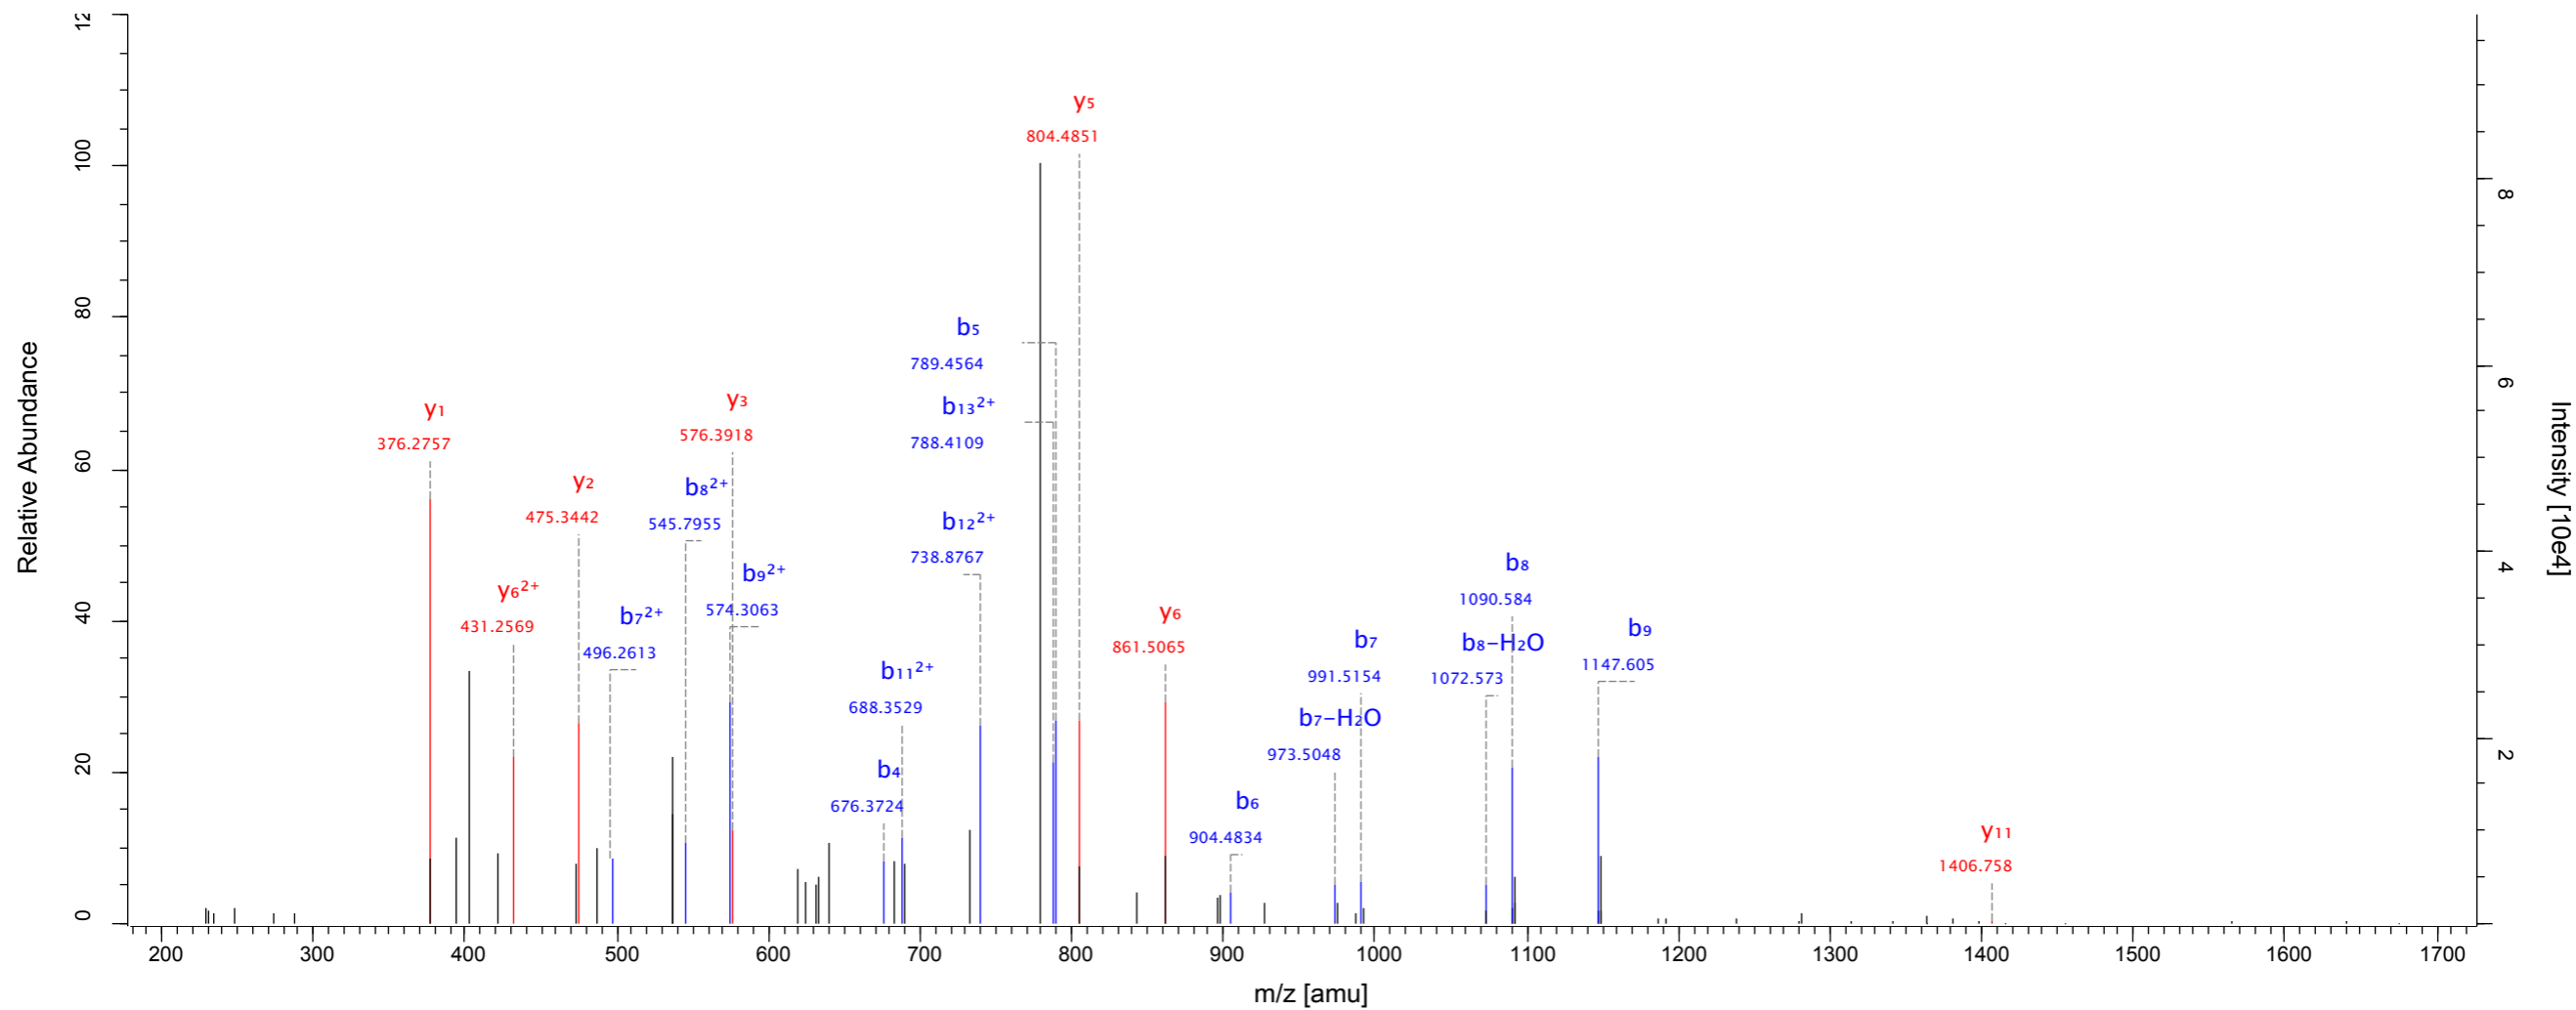

Source: mousePGCfemale-TMT6plex-group2-240ug-205min-11-12  
Scannumber: 42522  
Protein: Dusp9; mCG\_3242; RP23-329M9.2-001; Pyst3; Q7TNL7; Q8K1S9  
Peptide Score: 169.62  
Method: ITMS; CID; 1

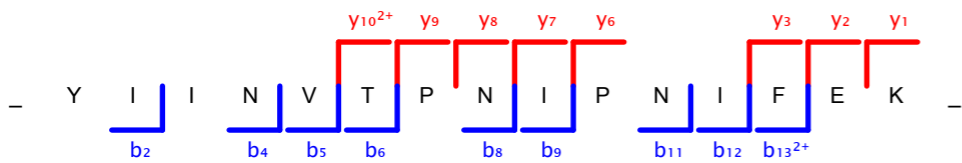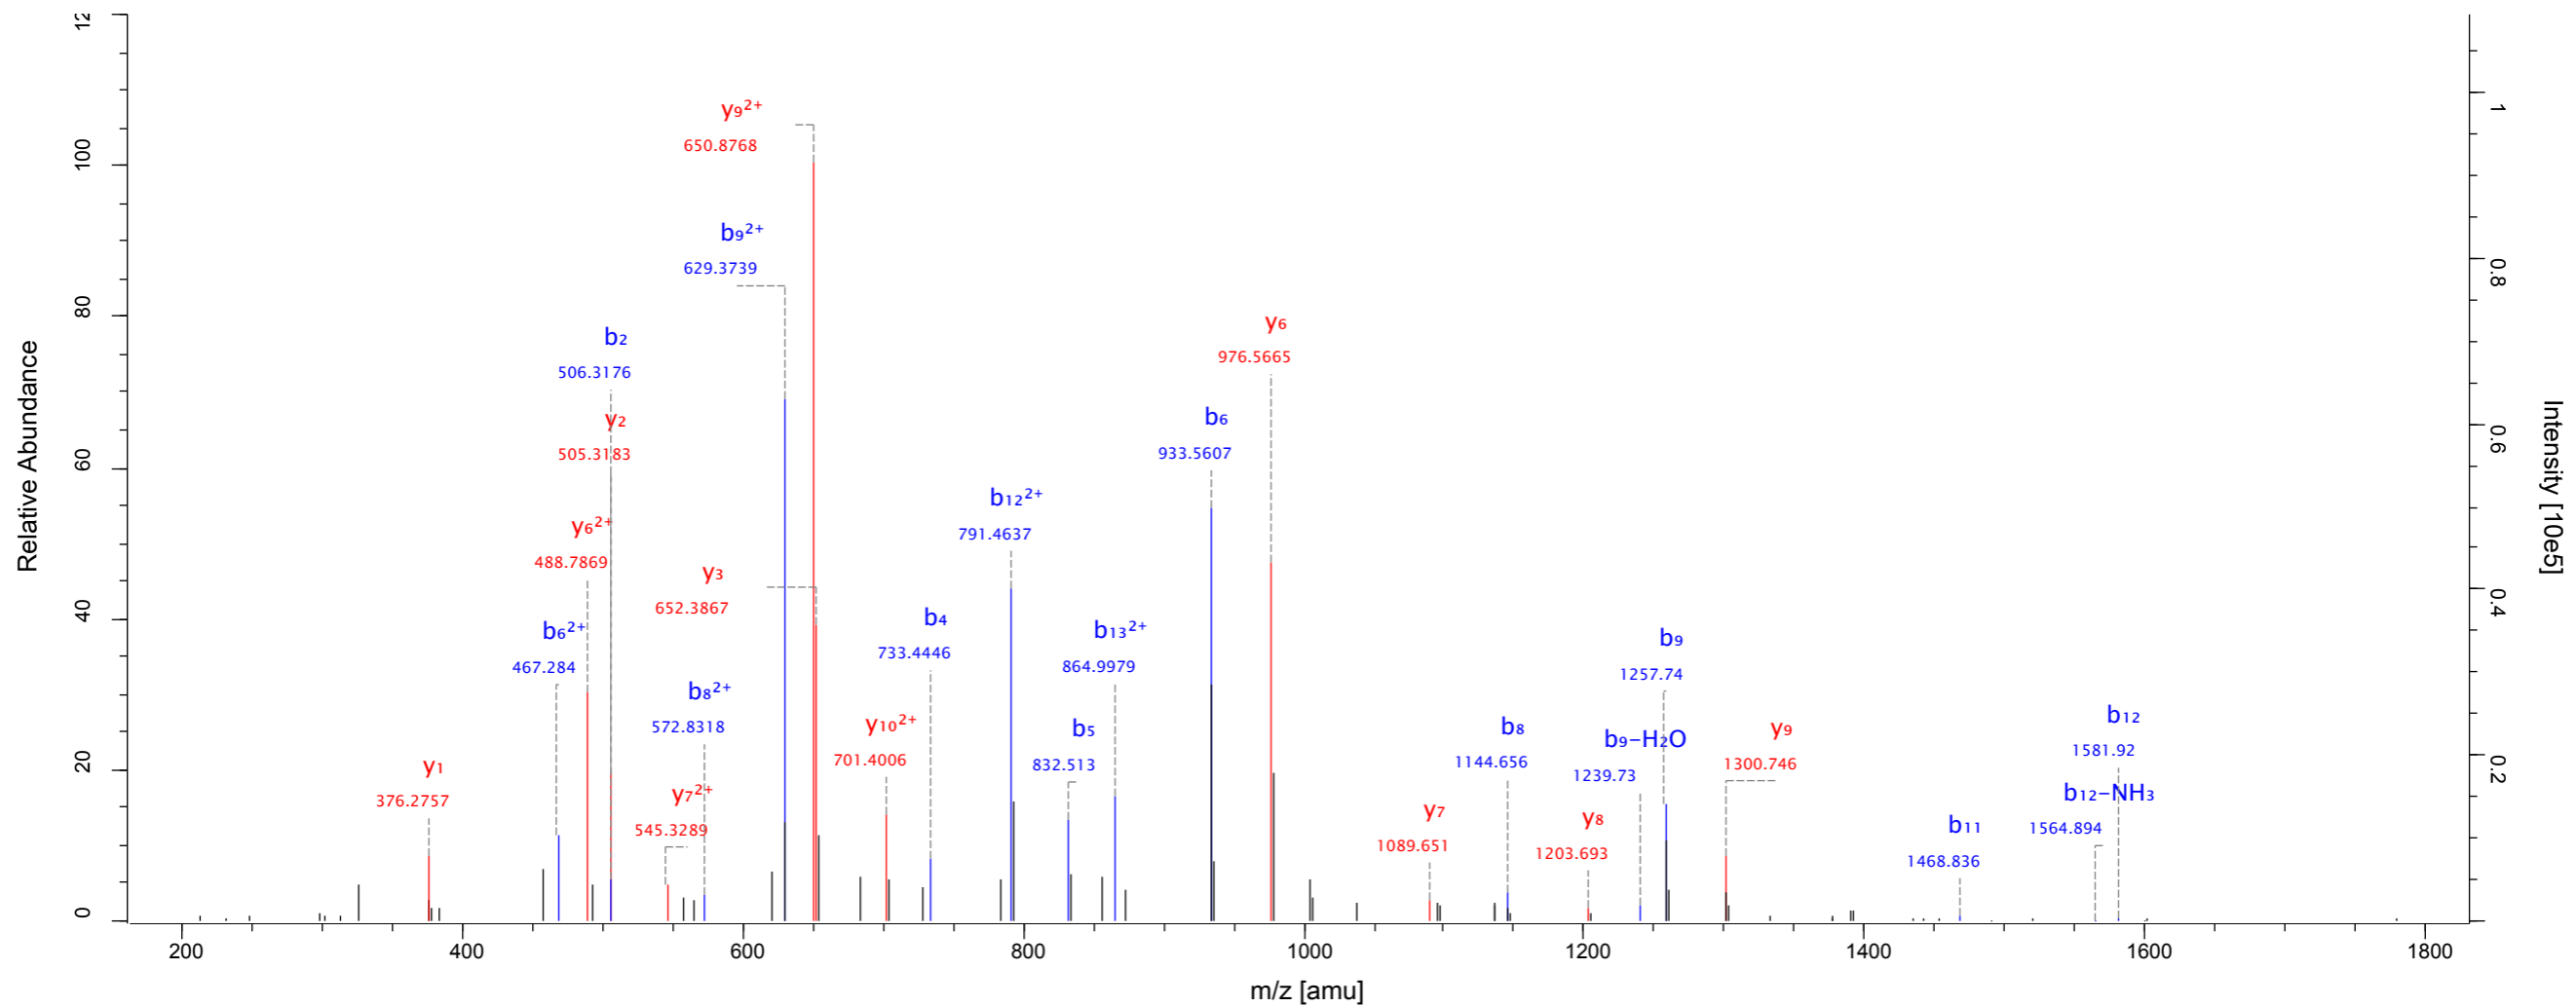

Source: mousePGCfemale-TMT6plex-group2-240ug-205min-13-14  
Scannumber: 39055  
Protein: Gadd45gip1; Q9CR59  
Peptide Score: 102.06  
Method: ITMS; CID; 1

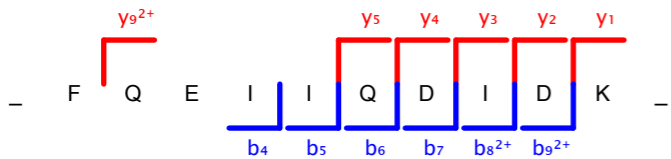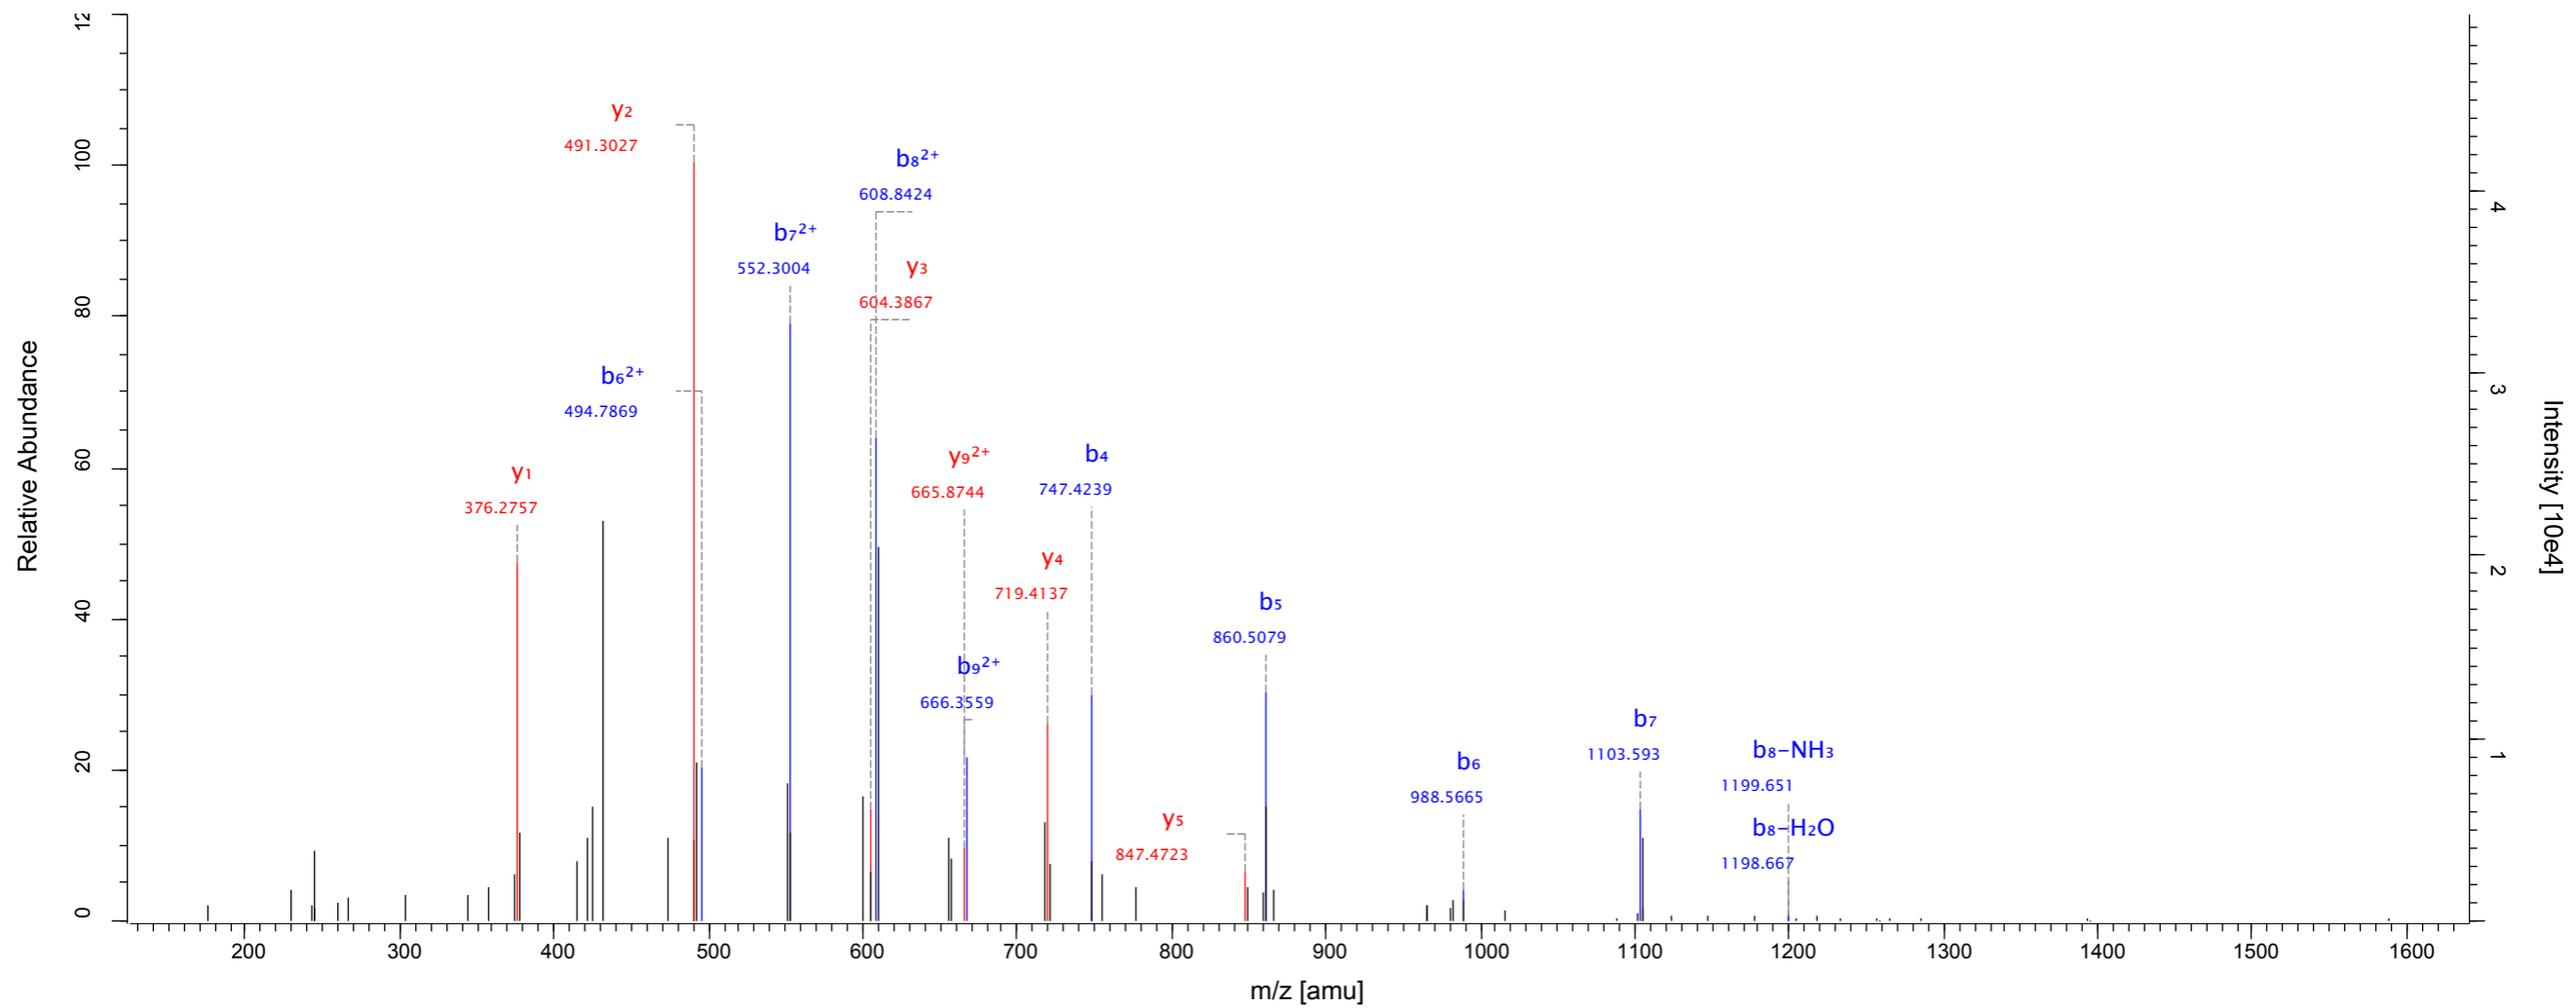

Source: mousePGCfemale-TMT6plex-group2-240ug-205min-15-16  
Scannumber: 2537  
Protein: Ptplb; Q9D3B1  
Peptide Score: 94.3  
Method: ITMS; CID; 1

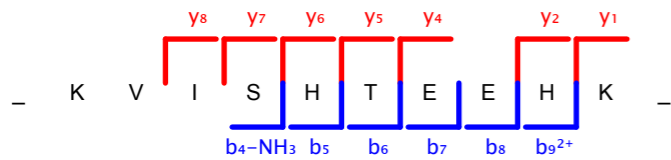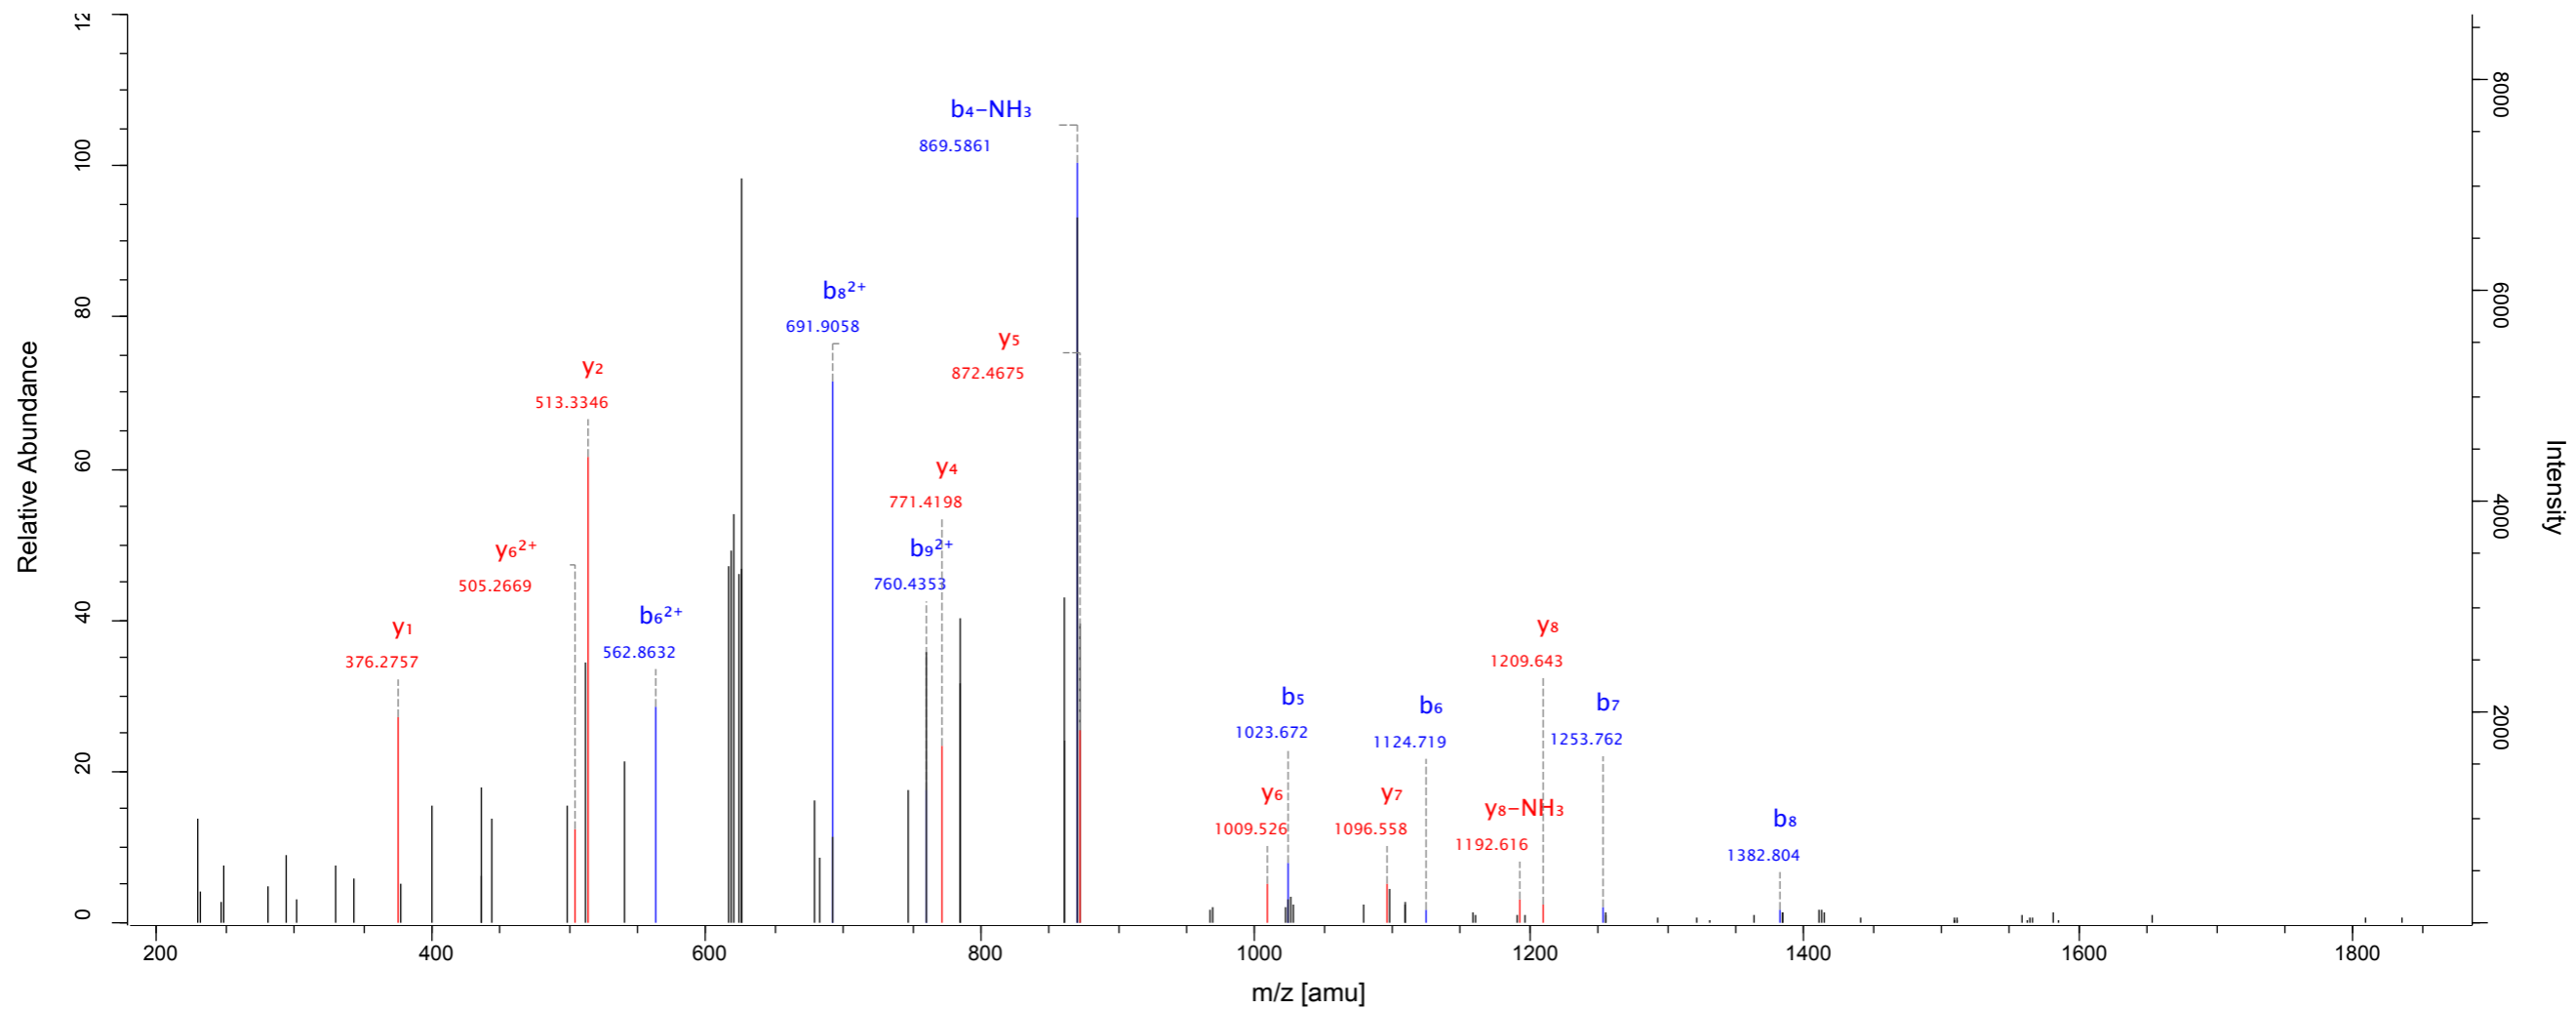



Source: mousePGCfemale-TMT6plex-group2-240ug-205min-15-16  
 Scannumber: 10461  
 Protein: Wbscr22; mCG\_16714; mCG\_16714; Wbscr22; Wbscr22; Q9CY21; Q148S9; Q148T0; D3YYK7; D3YWZ3; Q9D1L3  
 Peptide Score: 102.5  
 Method: ITMS; CID; 1

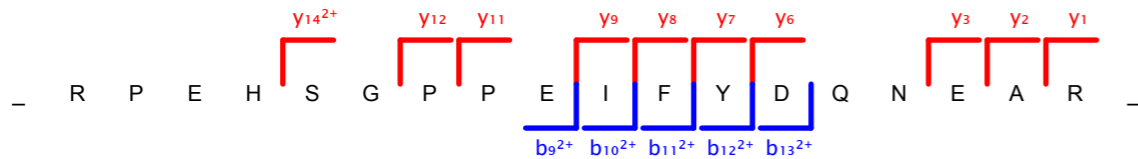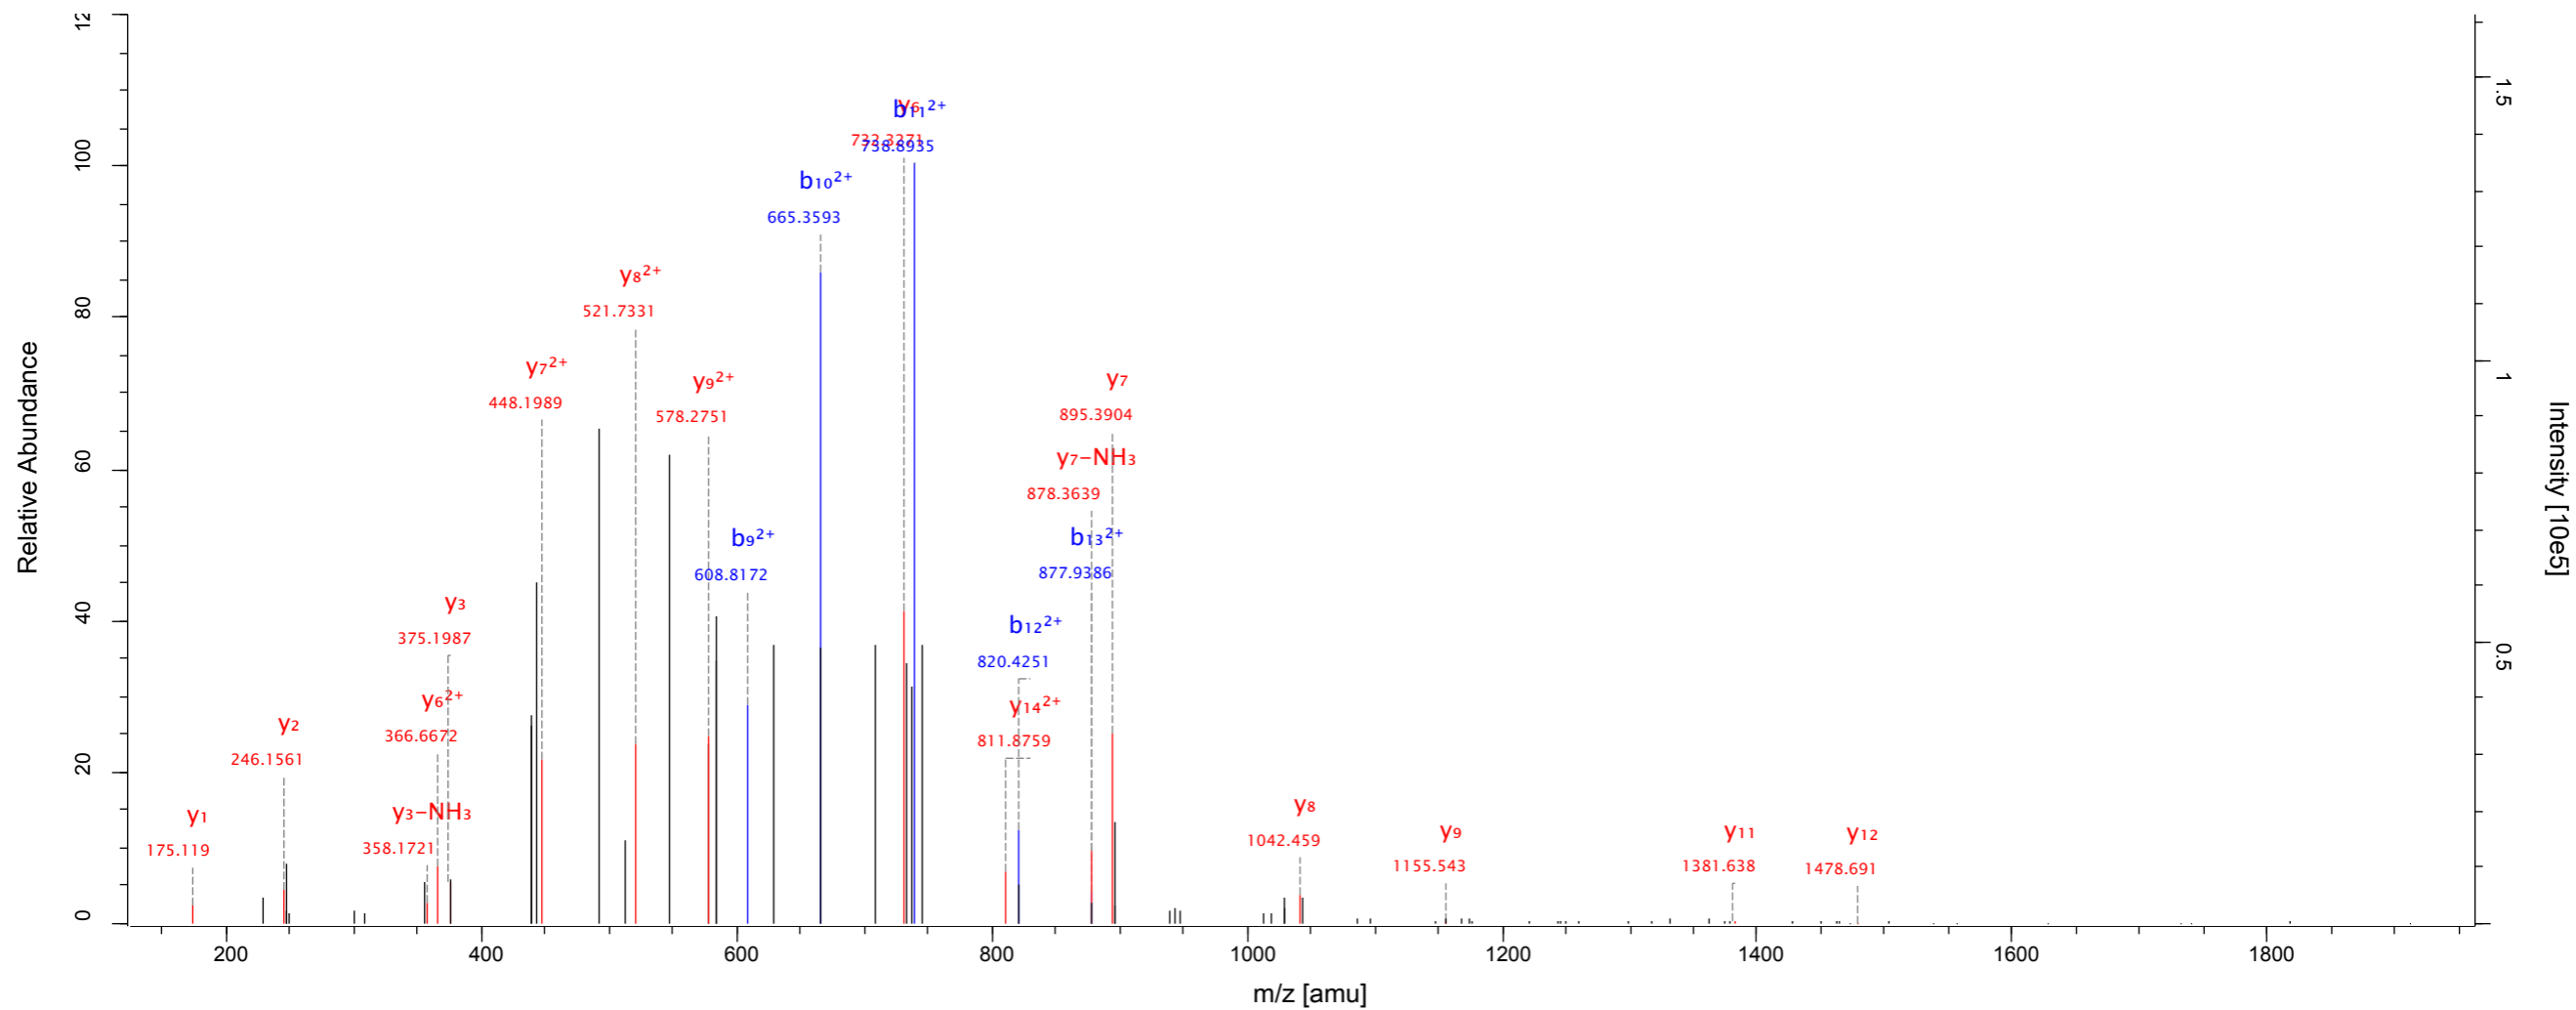

Source: mousePGCfemale-TMT6plex-group2-240ug-205min-15-16  
Scannumber: 26577  
Protein: Tmem111; Q99KI3  
Peptide Score: 152.7  
Method: ITMS; CID; 1

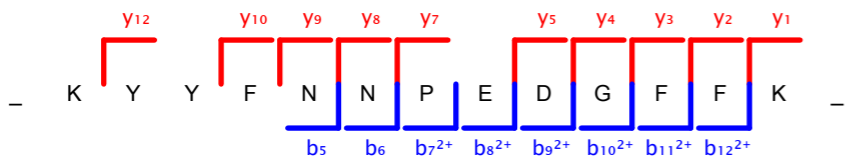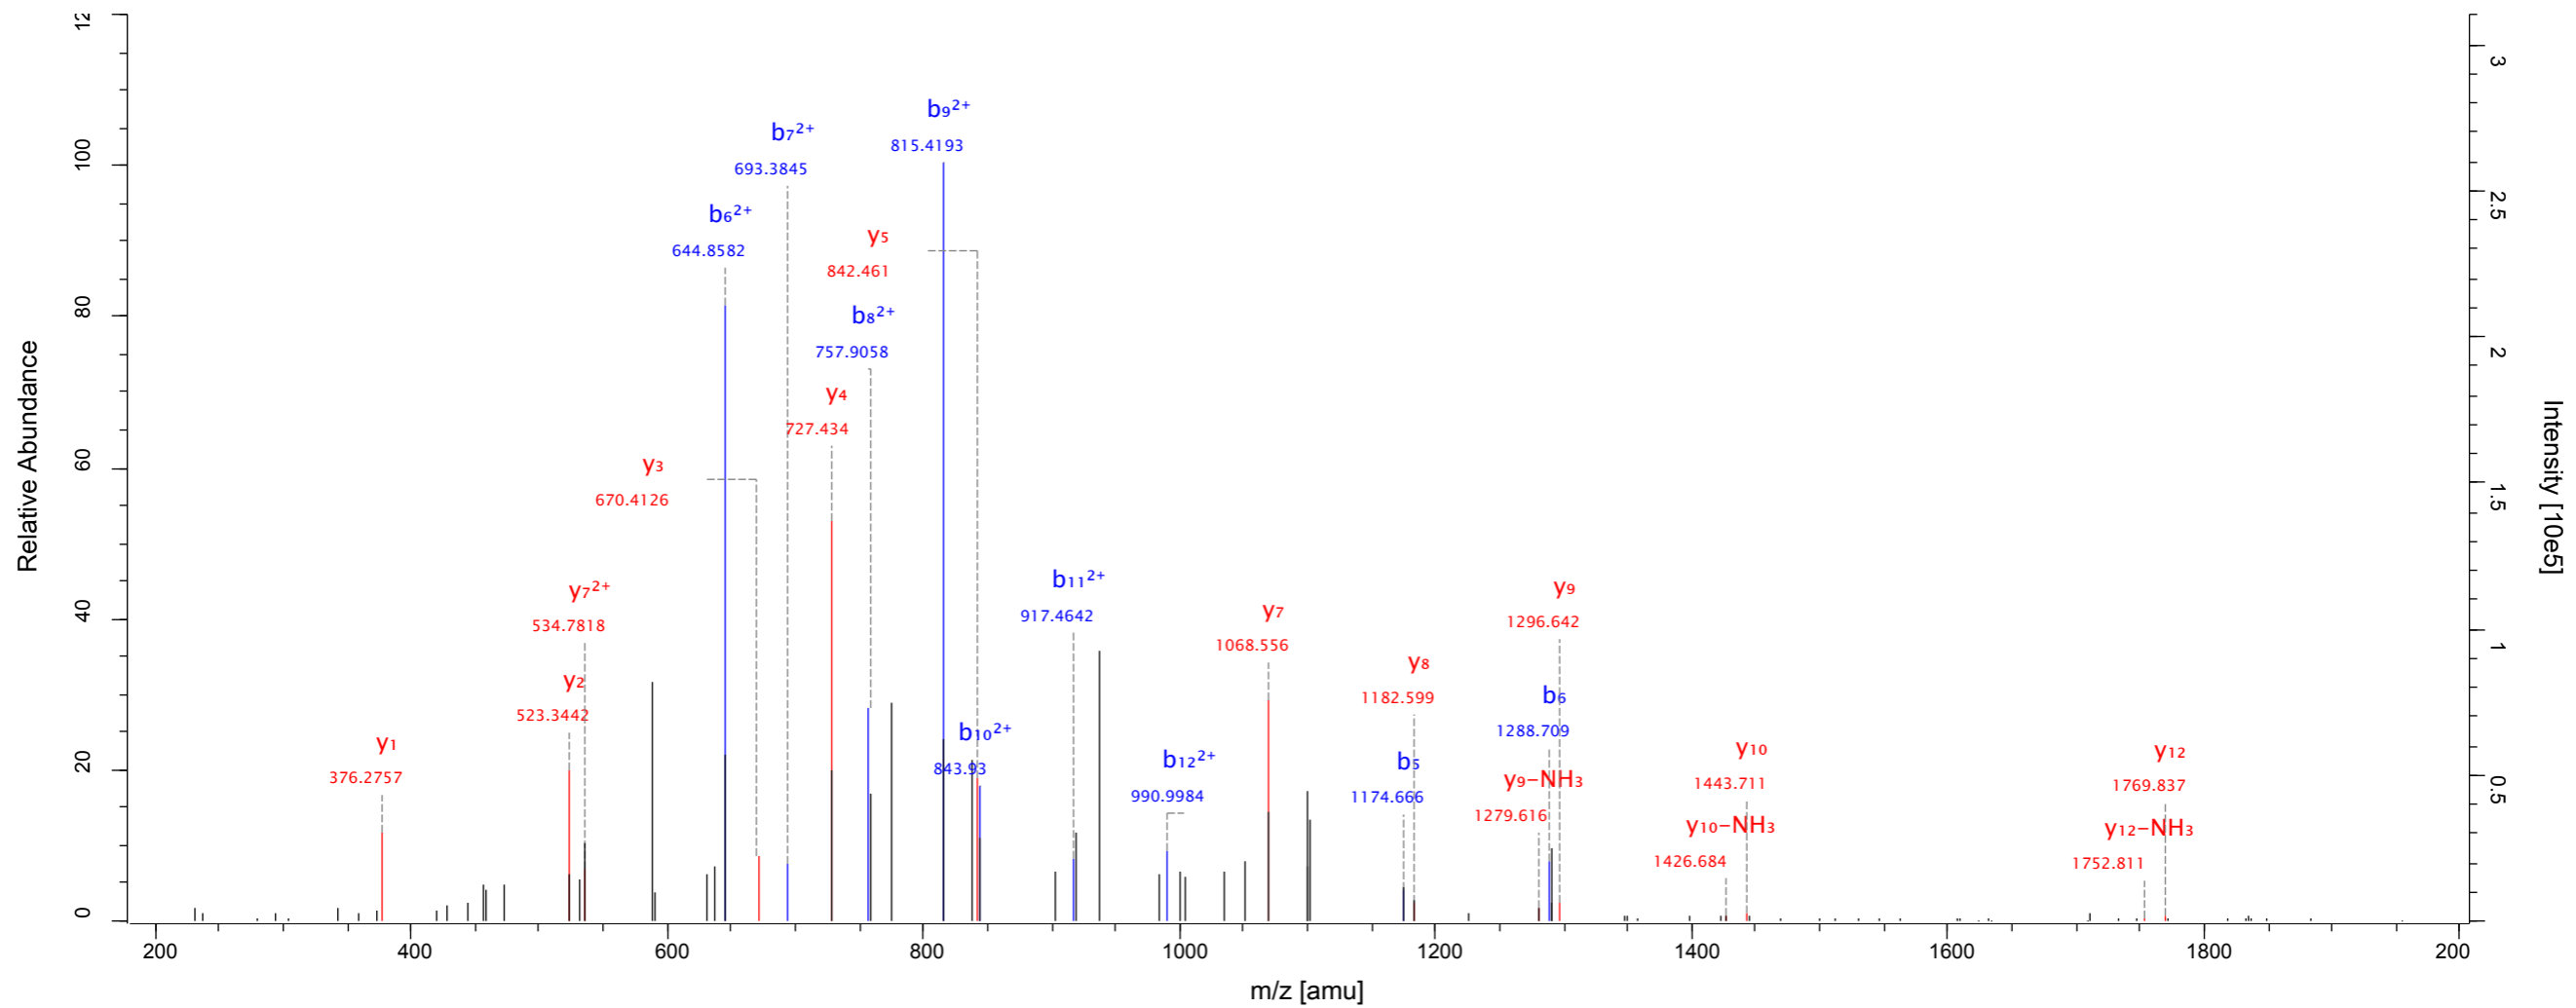

Source: mousePGCfemale-TMT6plex-group2-240ug-205min-15-16  
Scannumber: 42568  
Protein: mKIAA0327; Pcdhga8; mCG\_133388; Q5DTQ9; Q6PHX8; Q91XY0  
Peptide Score: 93.01  
Method: ITMS; CID; 1

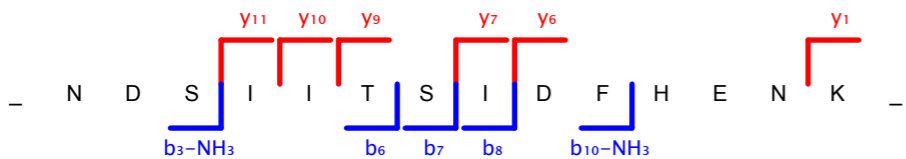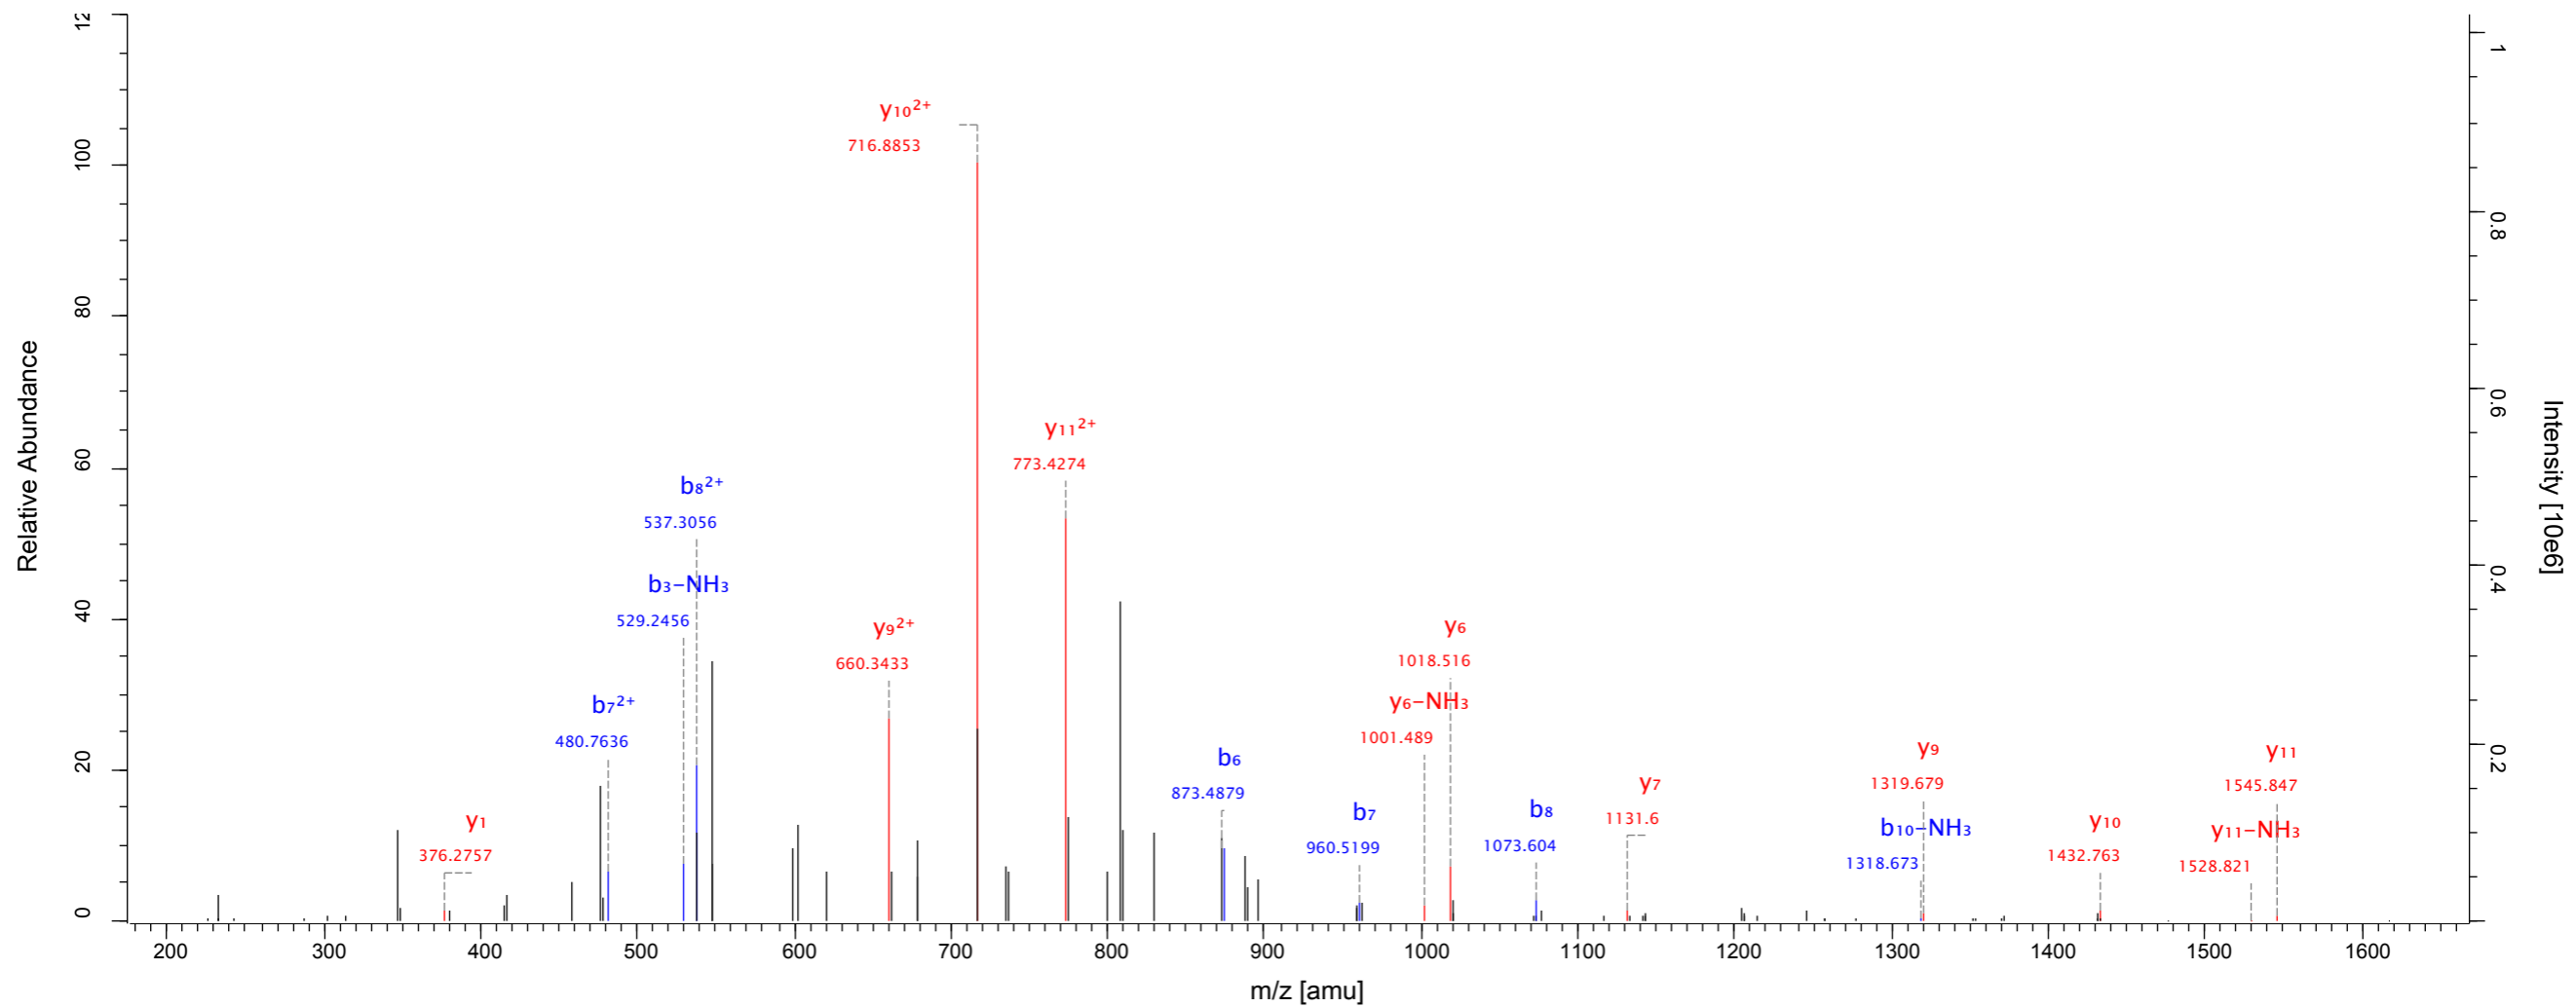

Source: mousePGCfemale-TMT6plex-group2-240ug-205min-17-18  
Scannumber: 21055  
Protein: lft172; Kiaa1179; Wim; Q6VH22-1; Q6VH22  
Peptide Score: 116.52  
Method: ITMS; CID; 1

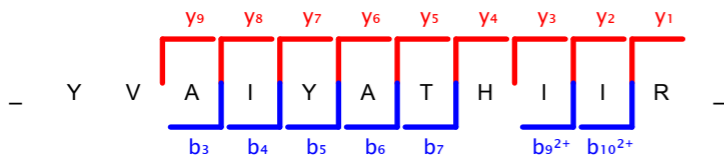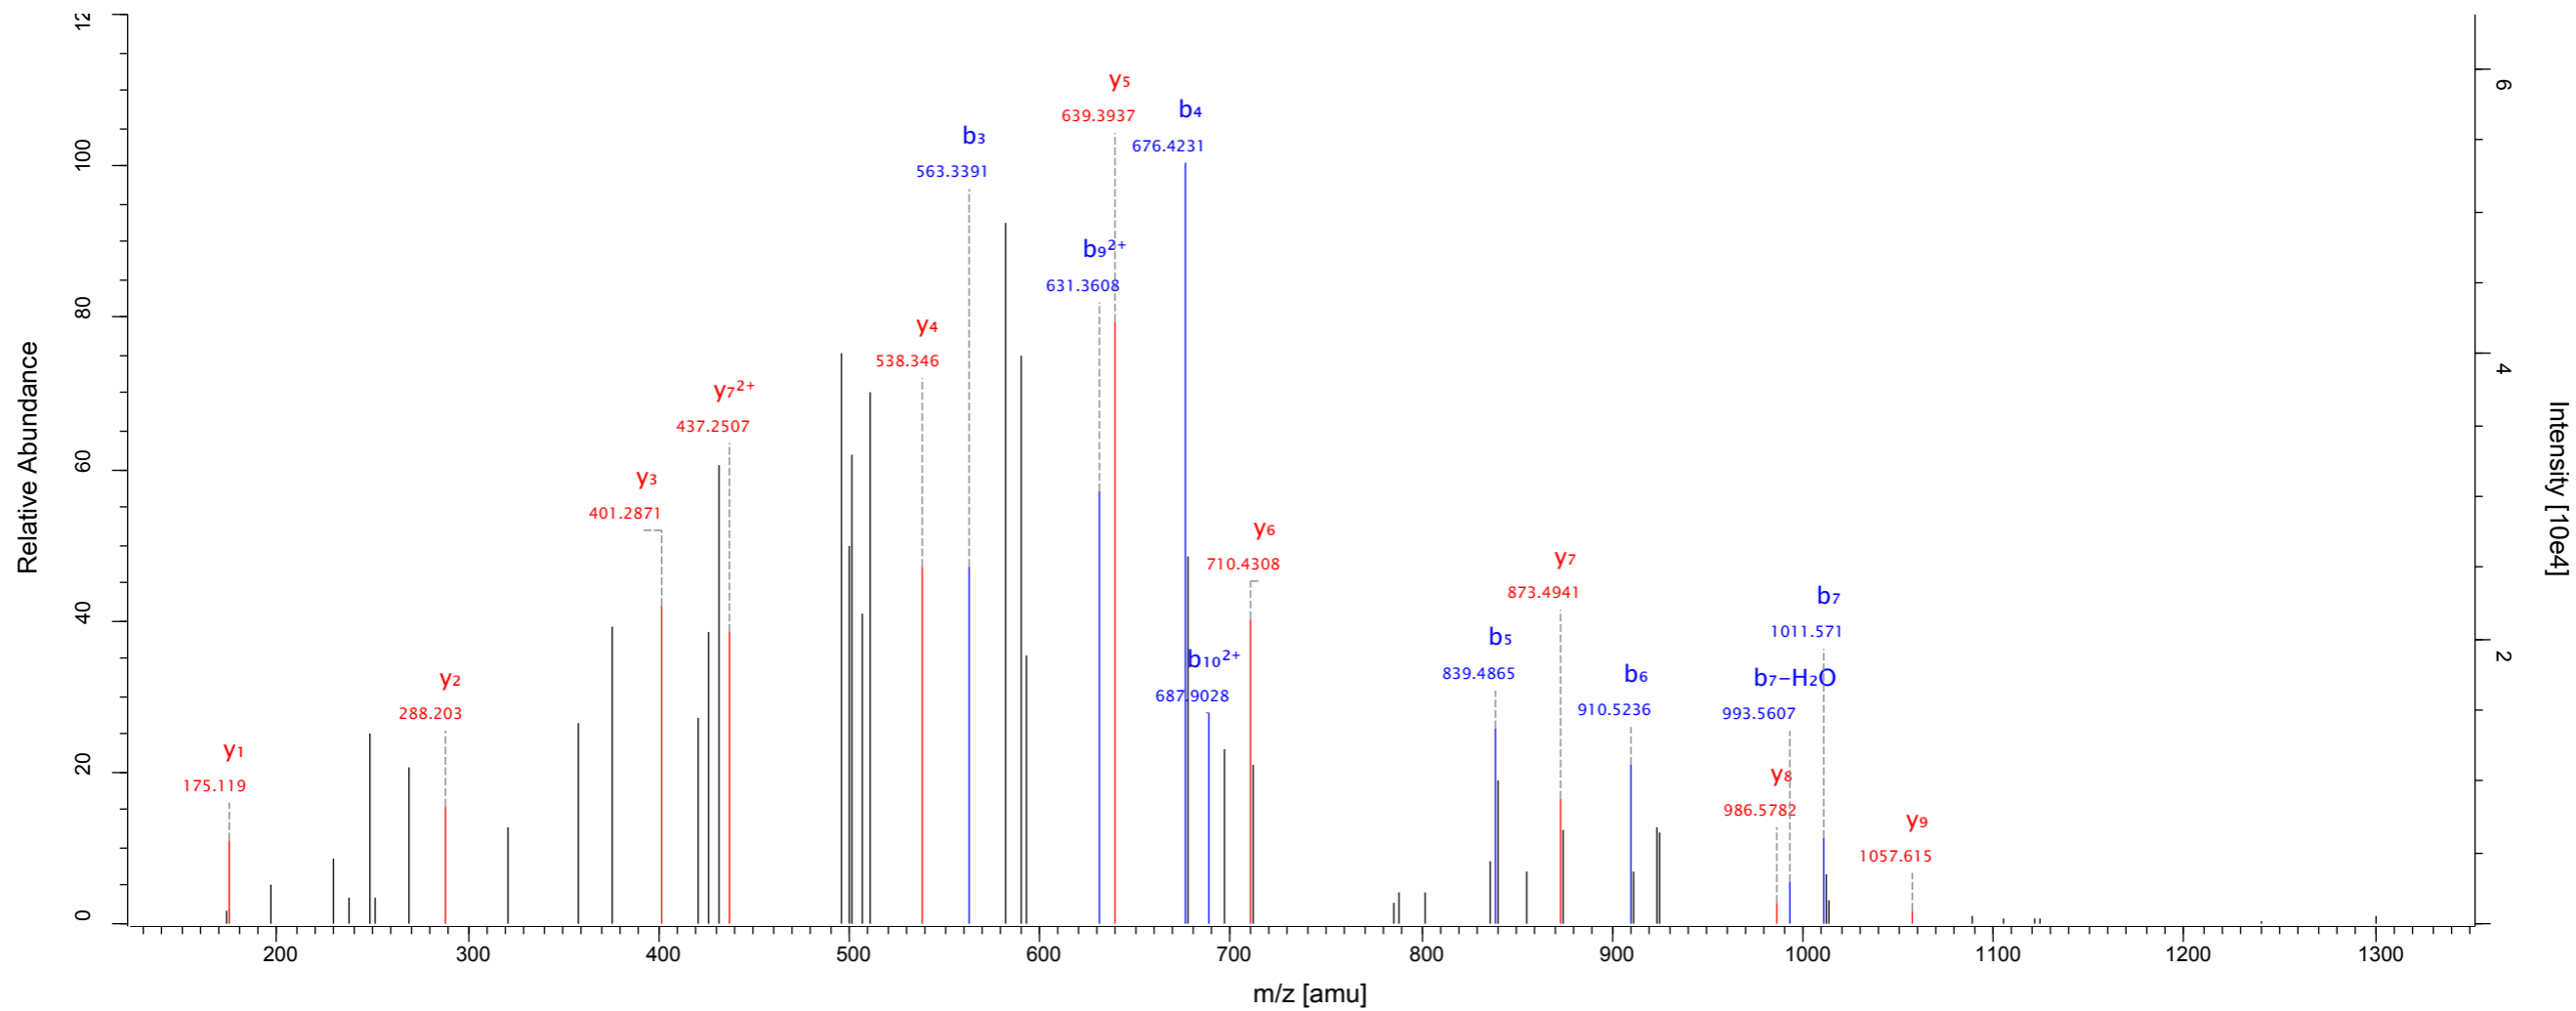

Source: mousePGCfemale-TMT6plex-group2-240ug-205min-17-18  
 Scannumber: 26454  
 Protein: Smbp; Tm9sf3; mKIAA4036; Smbp; Tm9sf3; Smbp; Tm9sf3; Q9ET30; Q571B0; Q3UH23; Q8C6F5  
 Peptide Score: 113.29  
 Method: ITMS; CID; 1

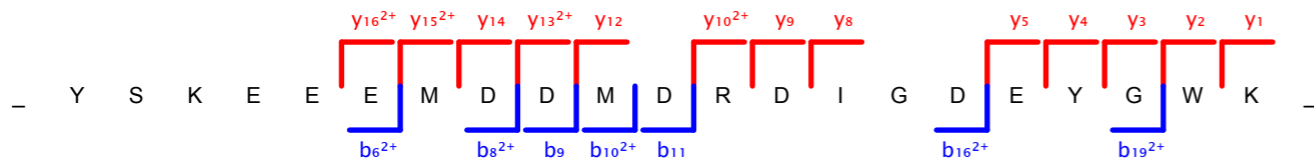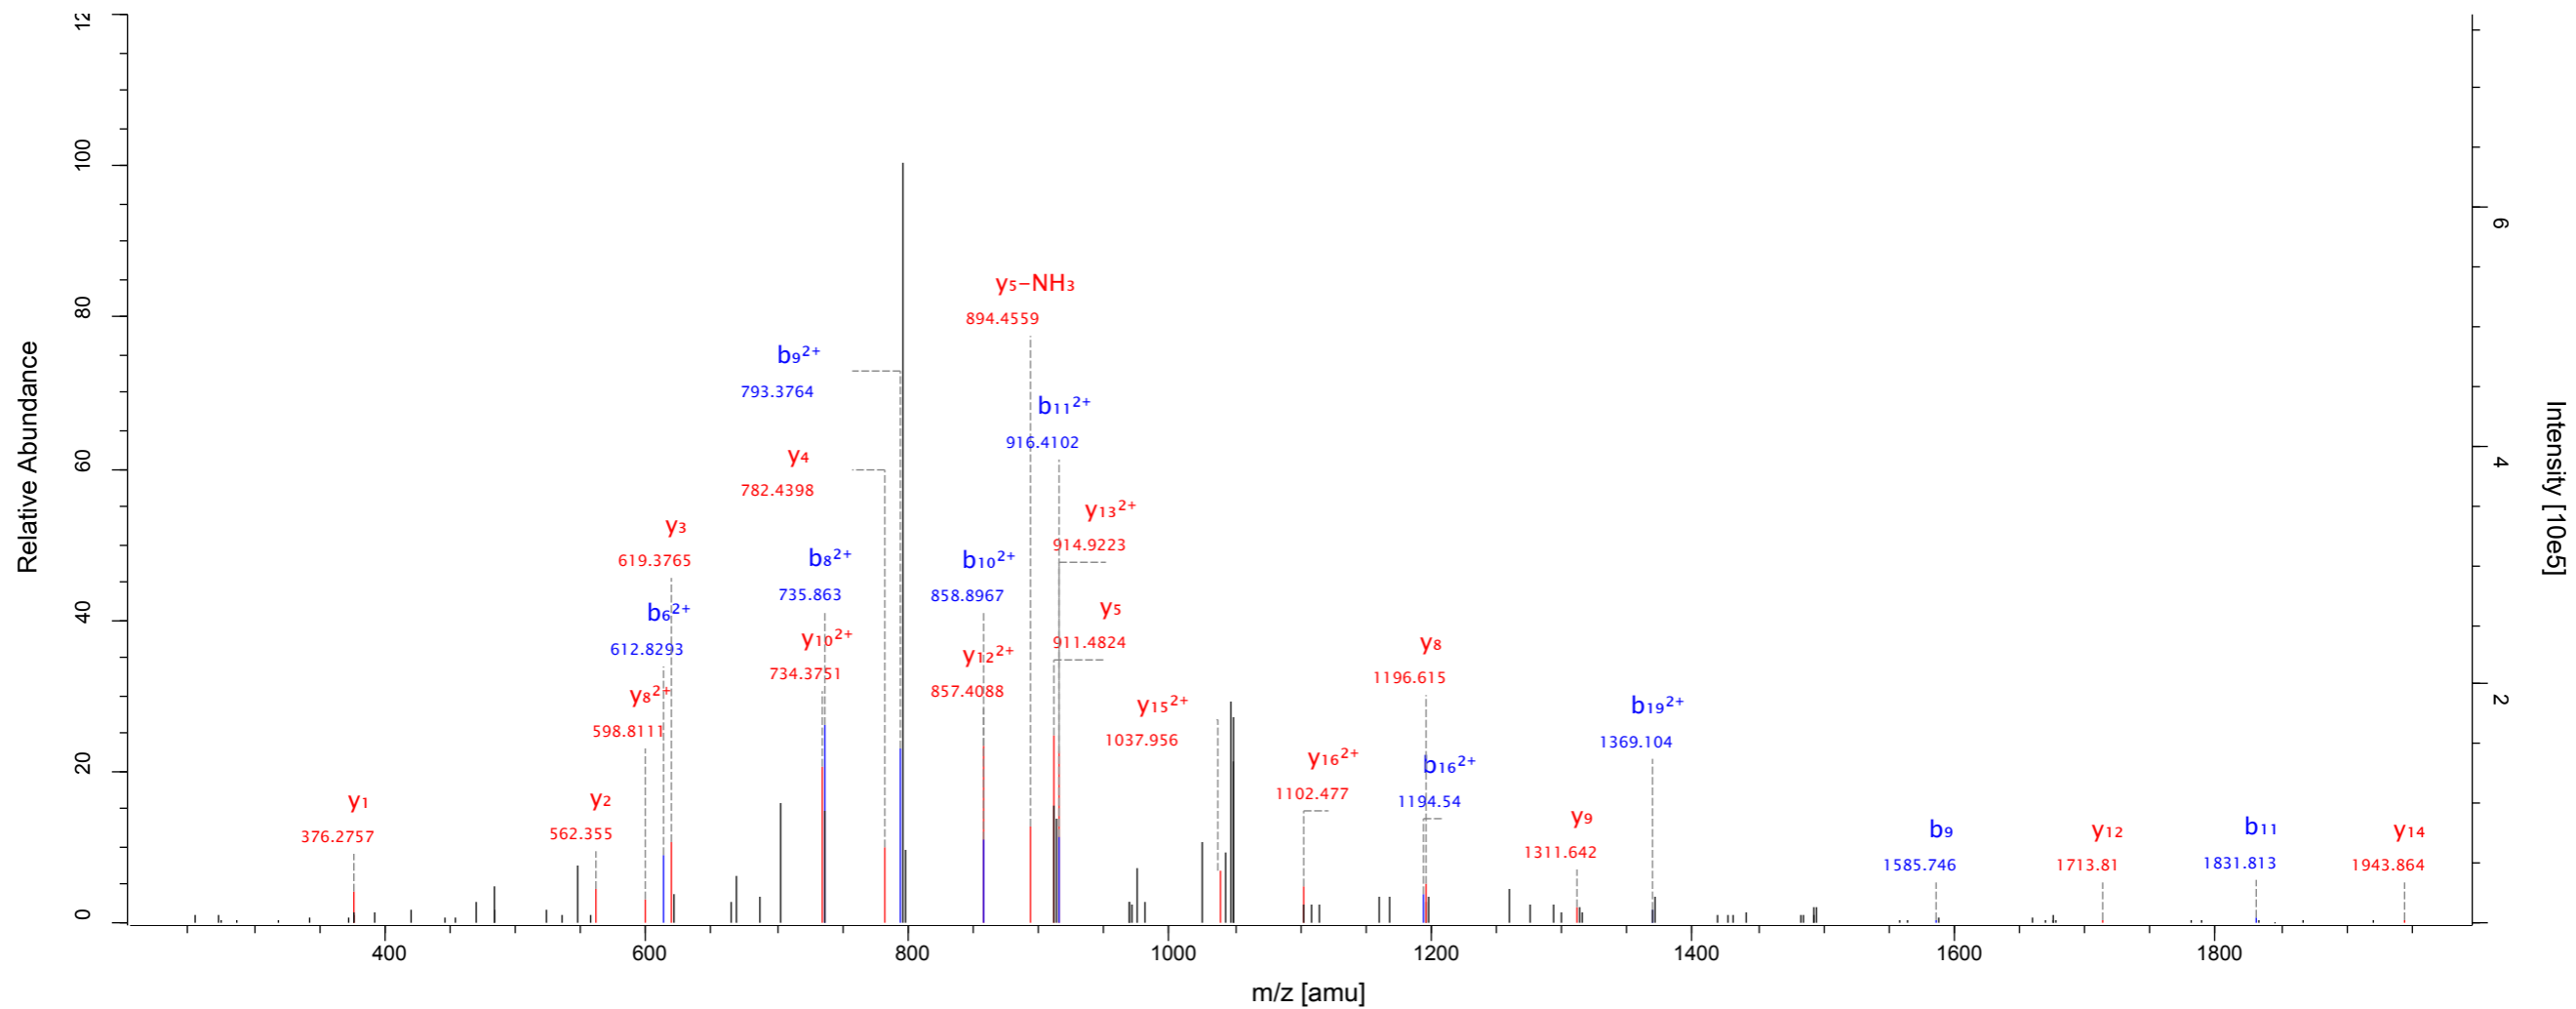

Source: mousePGCfemale-TMT6plex-group2-240ug-205min-17-18  
Scannumber: 34289  
Protein: MNCb-1039; Mrfap1; Pam14; Q9CQL7  
Peptide Score: 121.5  
Method: ITMS; CID; 1

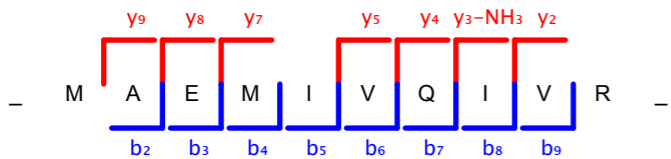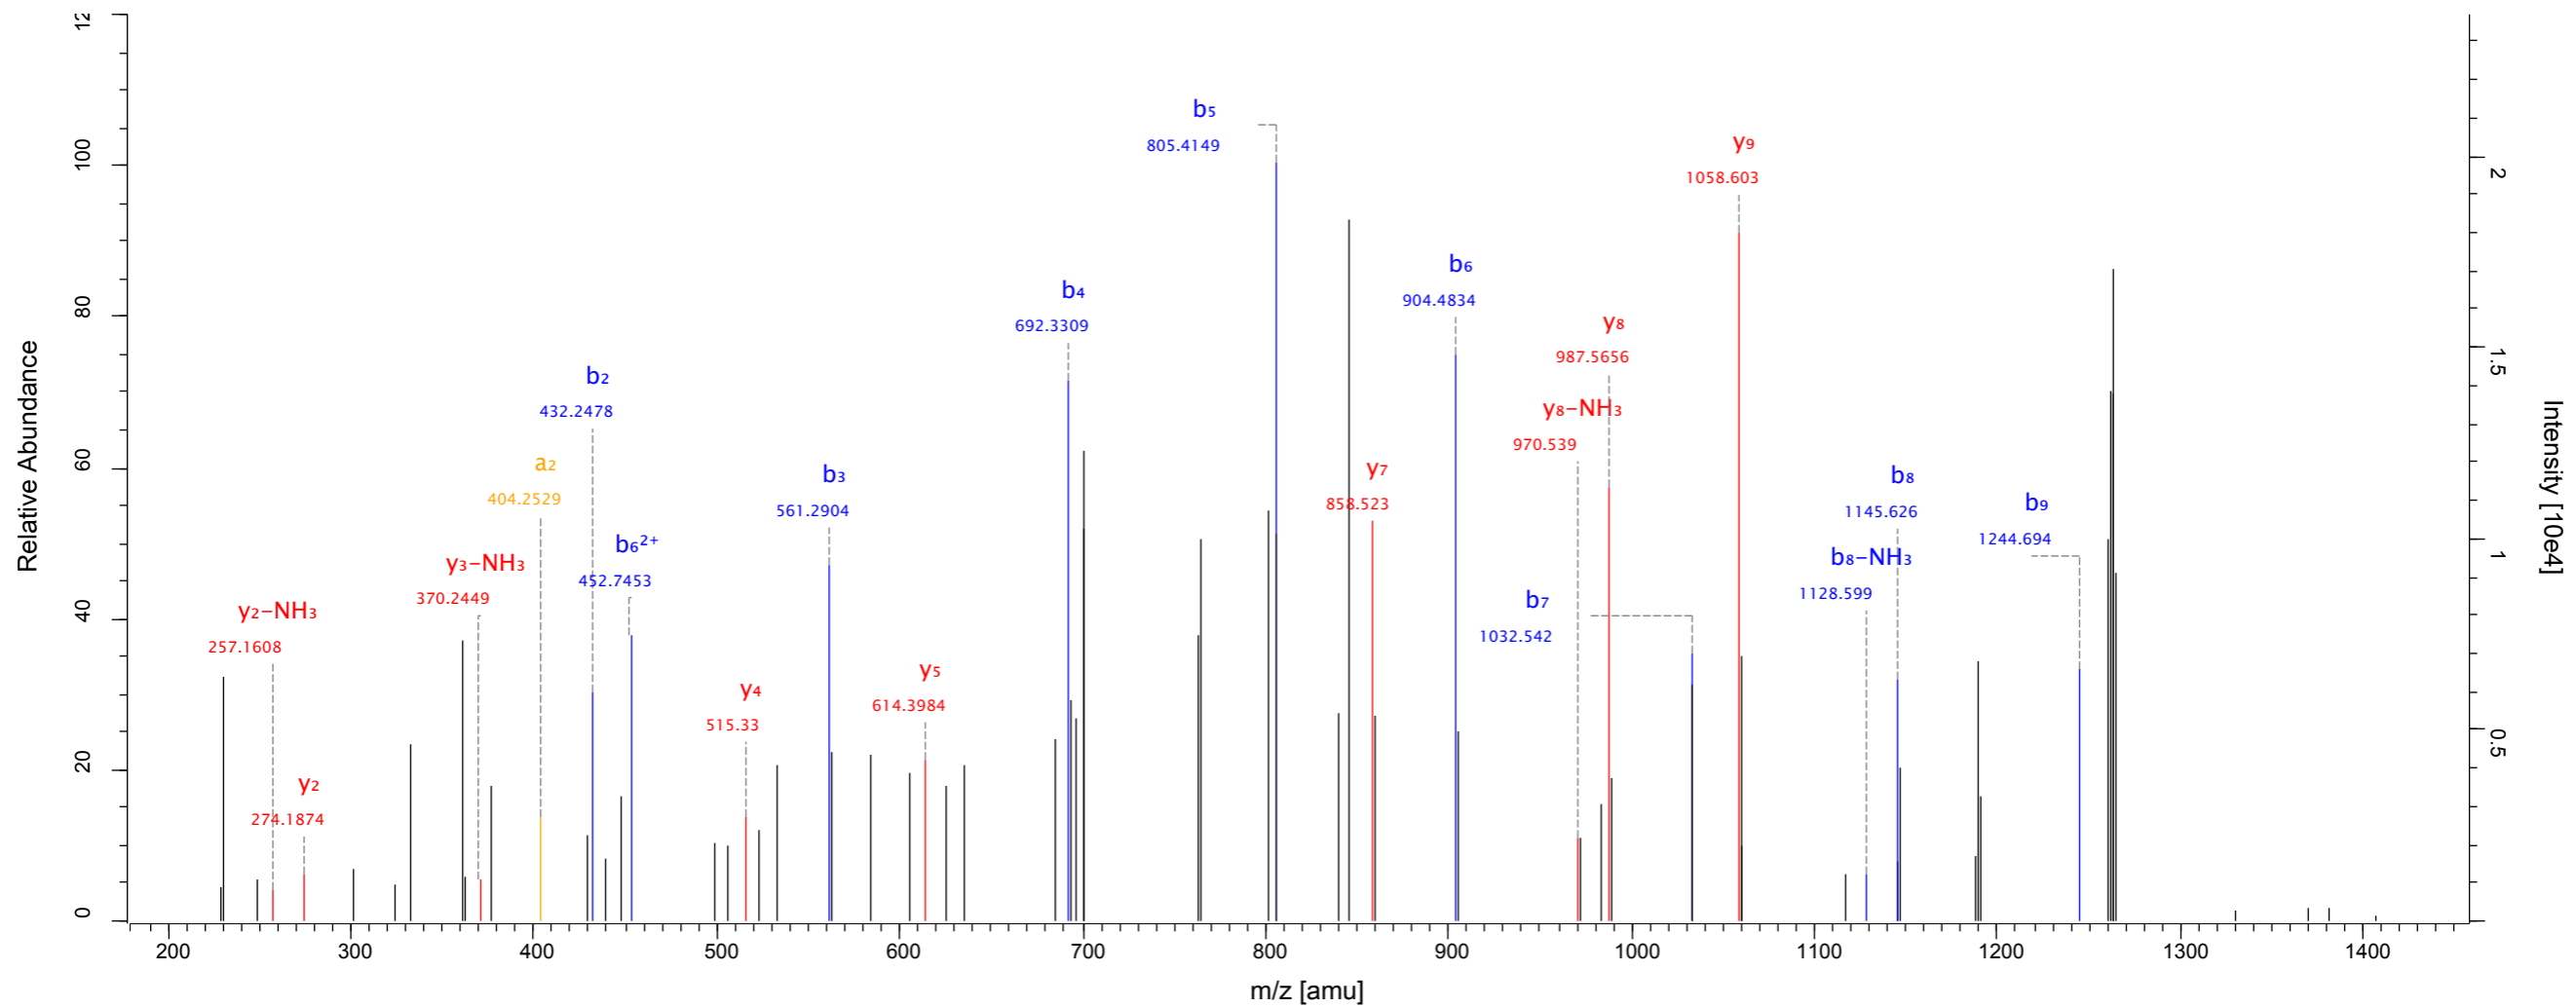

Source: mousePGCfemale-TMT6plex-group2-240ug-205min-17-18  
Scannumber: 38871  
Protein: Vkorc1l1; Q6TEK5; Q9D781  
Peptide Score: 177.06  
Method: ITMS; CID; 1

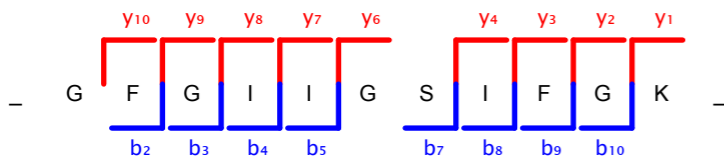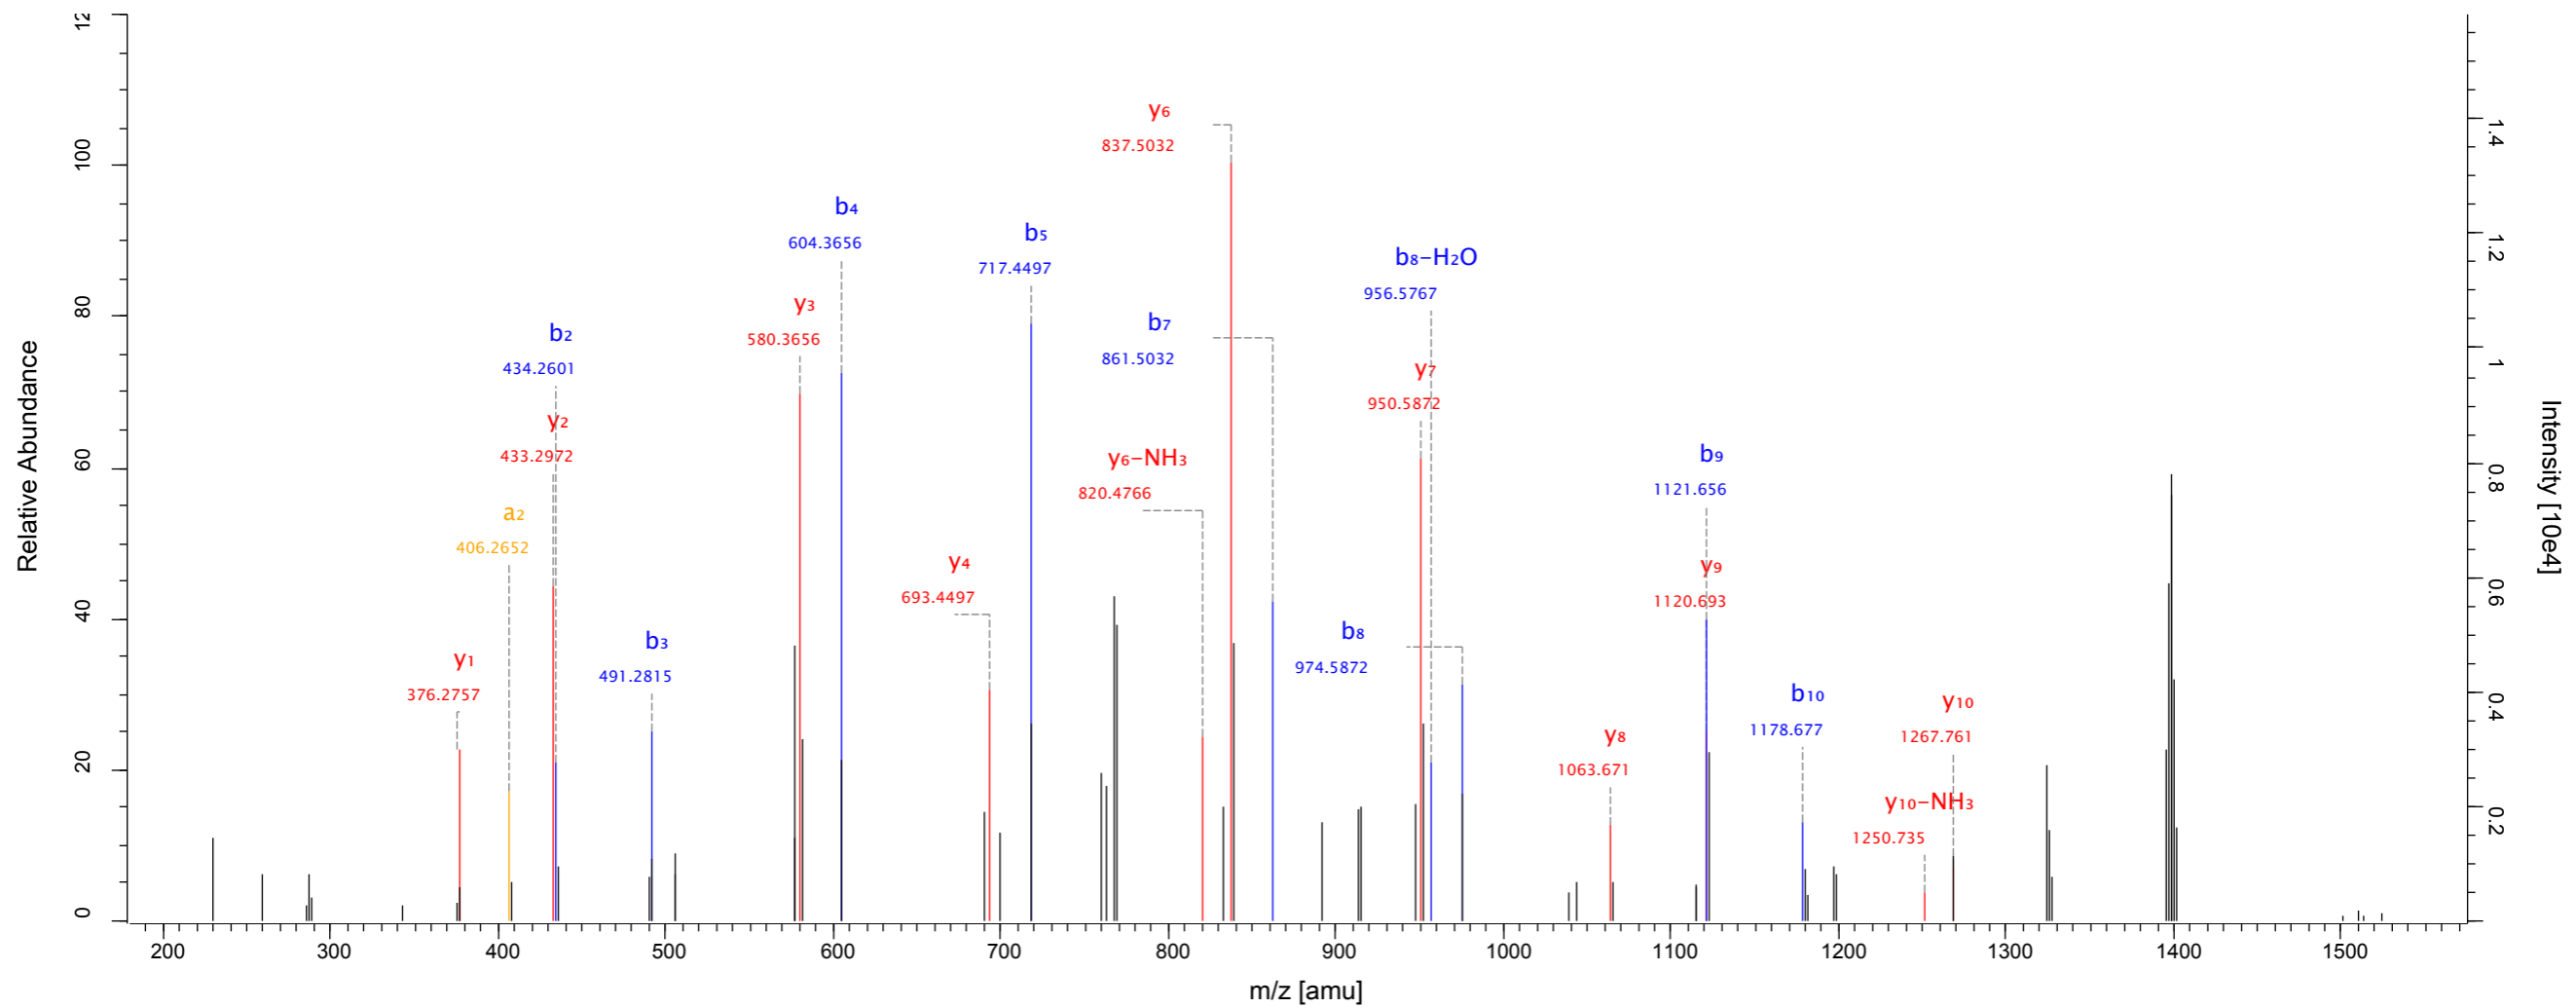

Source: mousePGCfemale-TMT6plex-group2-240ug-205min-19-20  
Scannumber: 19006  
Protein: Mageg1; Ndnl2; mFLJ00211; Q9CPR8; Q6KAQ0  
Peptide Score: 81.62  
Method: ITMS; CID; 1

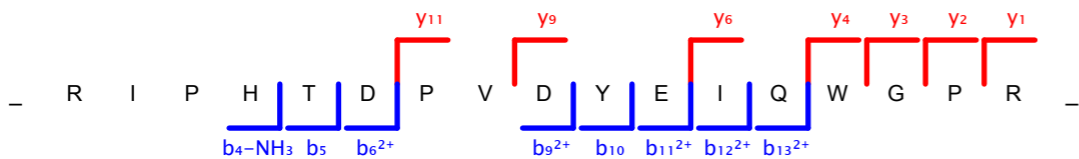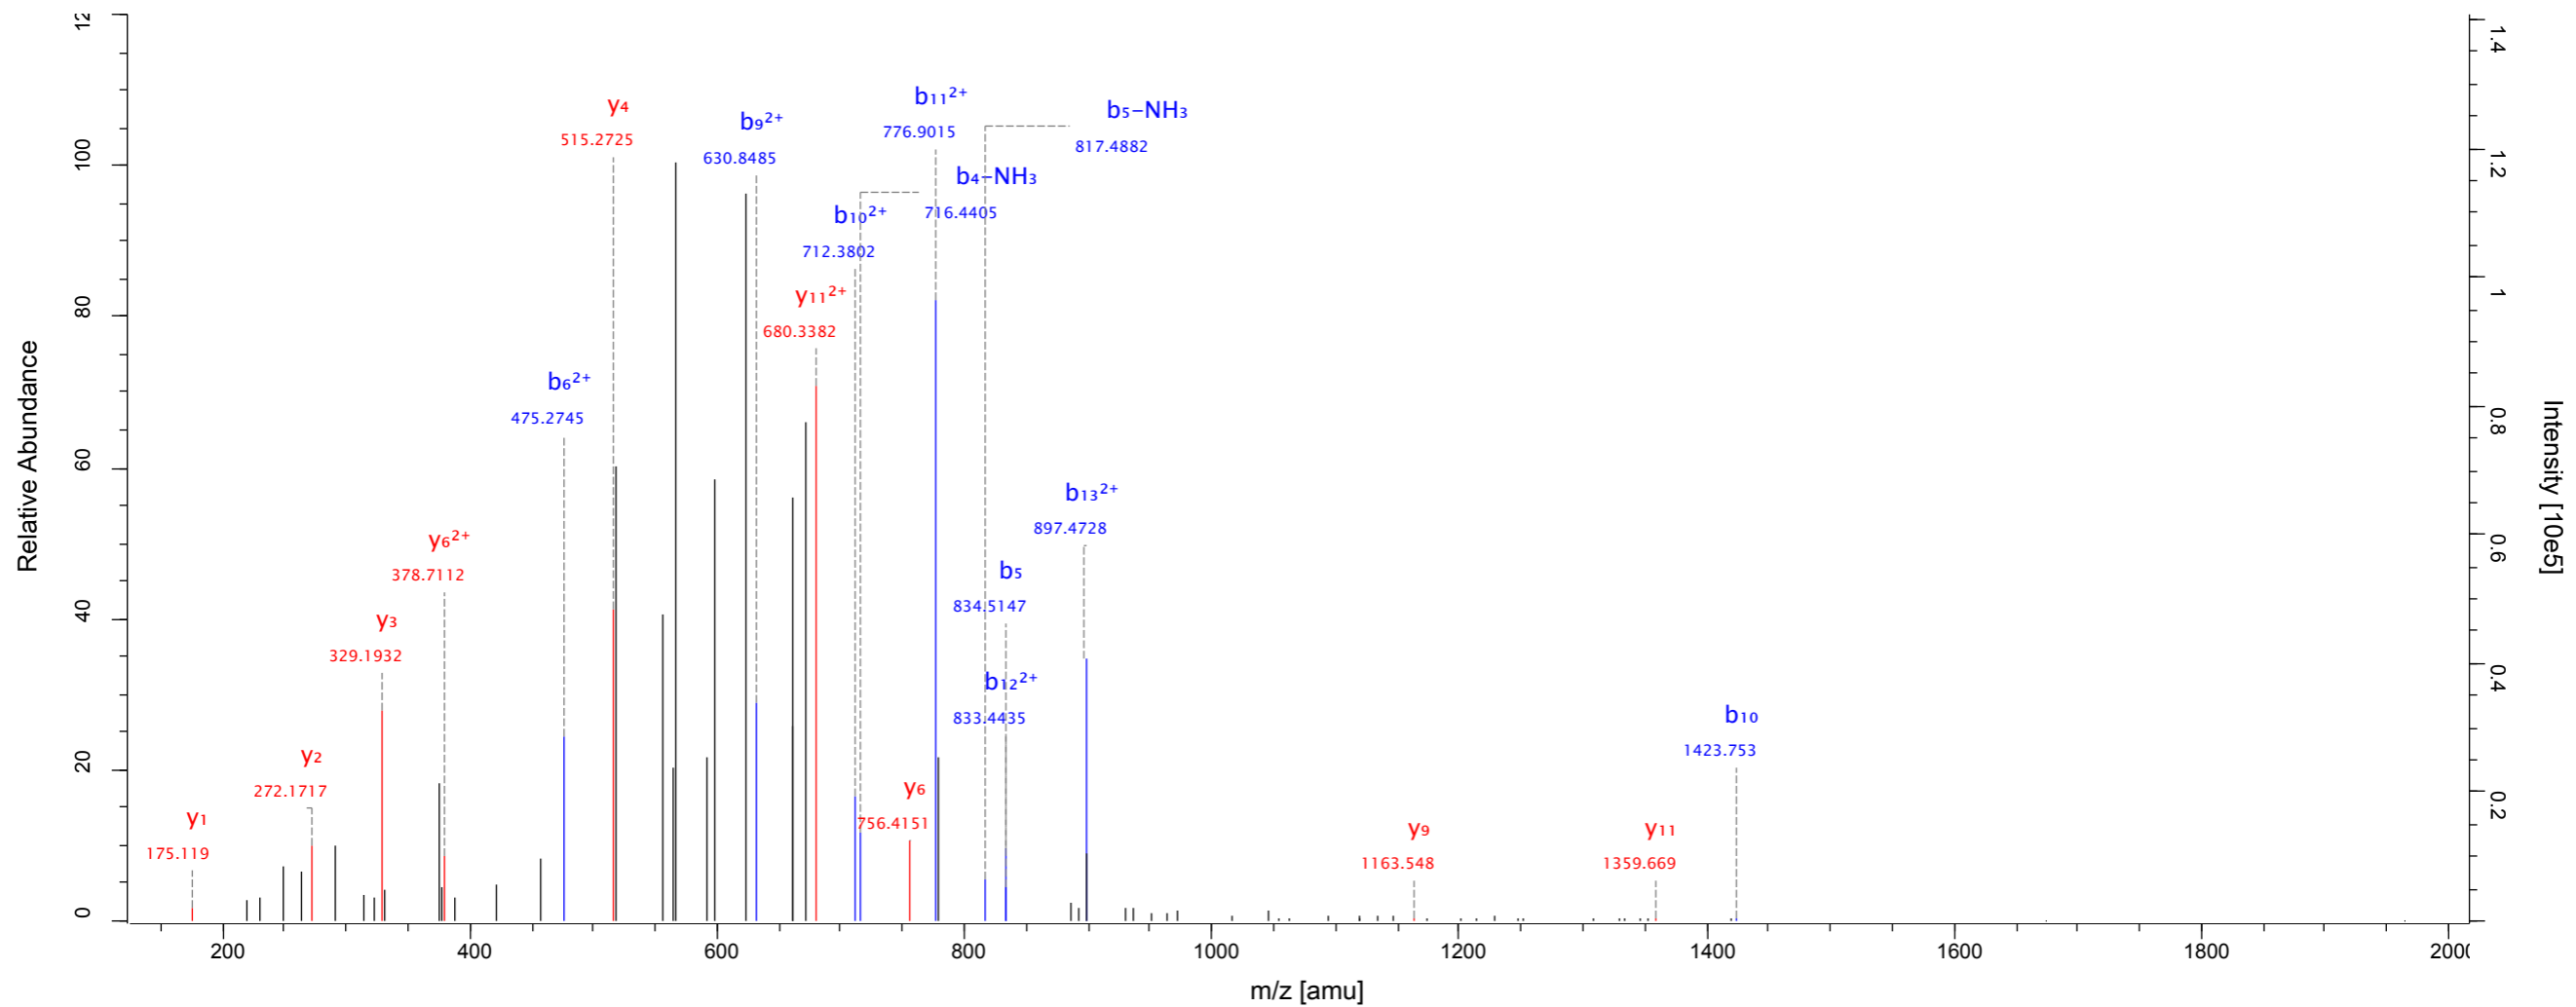



Source: mousePGCfemale-TMT6plex-group2-240ug-205min-19-20  
Scannumber: 20780  
Protein: Kiaa1885; Vars2; Vars2l; Vars2; E9QMJ4; Q3U2A8; E9Q4G3; Q8K2X9  
Peptide Score: 164.64  
Method: ITMS; CID; 1

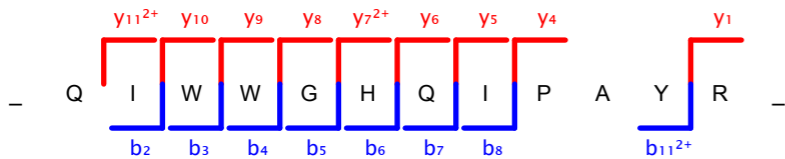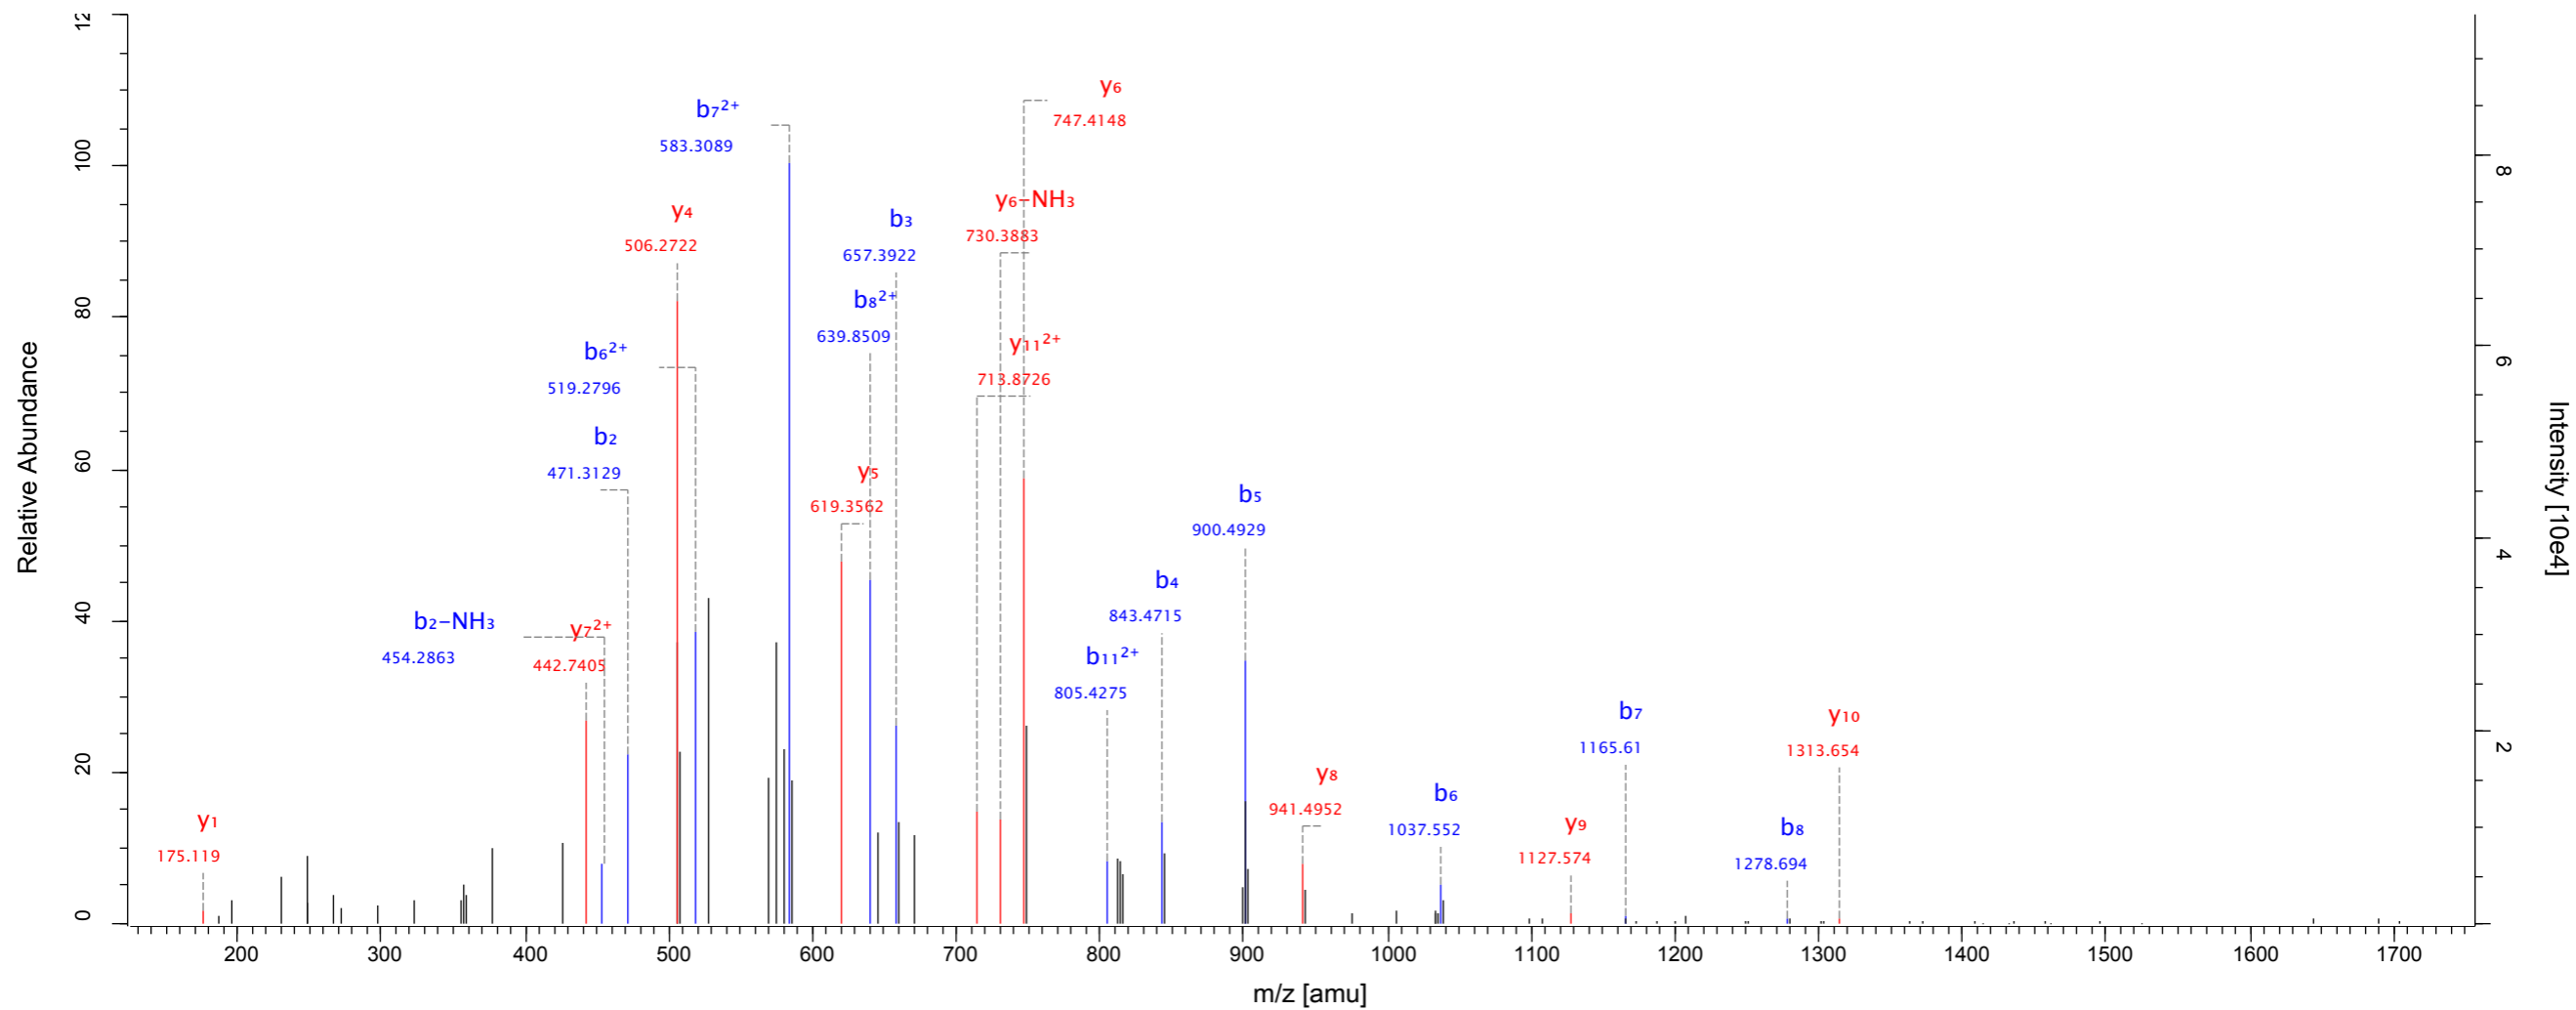

Source: mousePGCfemale-TMT6plex-group2-240ug-205min-19-20  
Scannumber: 21319  
Protein: Gm4969; D3YZT1  
Peptide Score: 125.82  
Method: ITMS; CID; 1

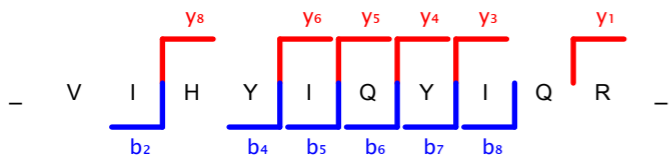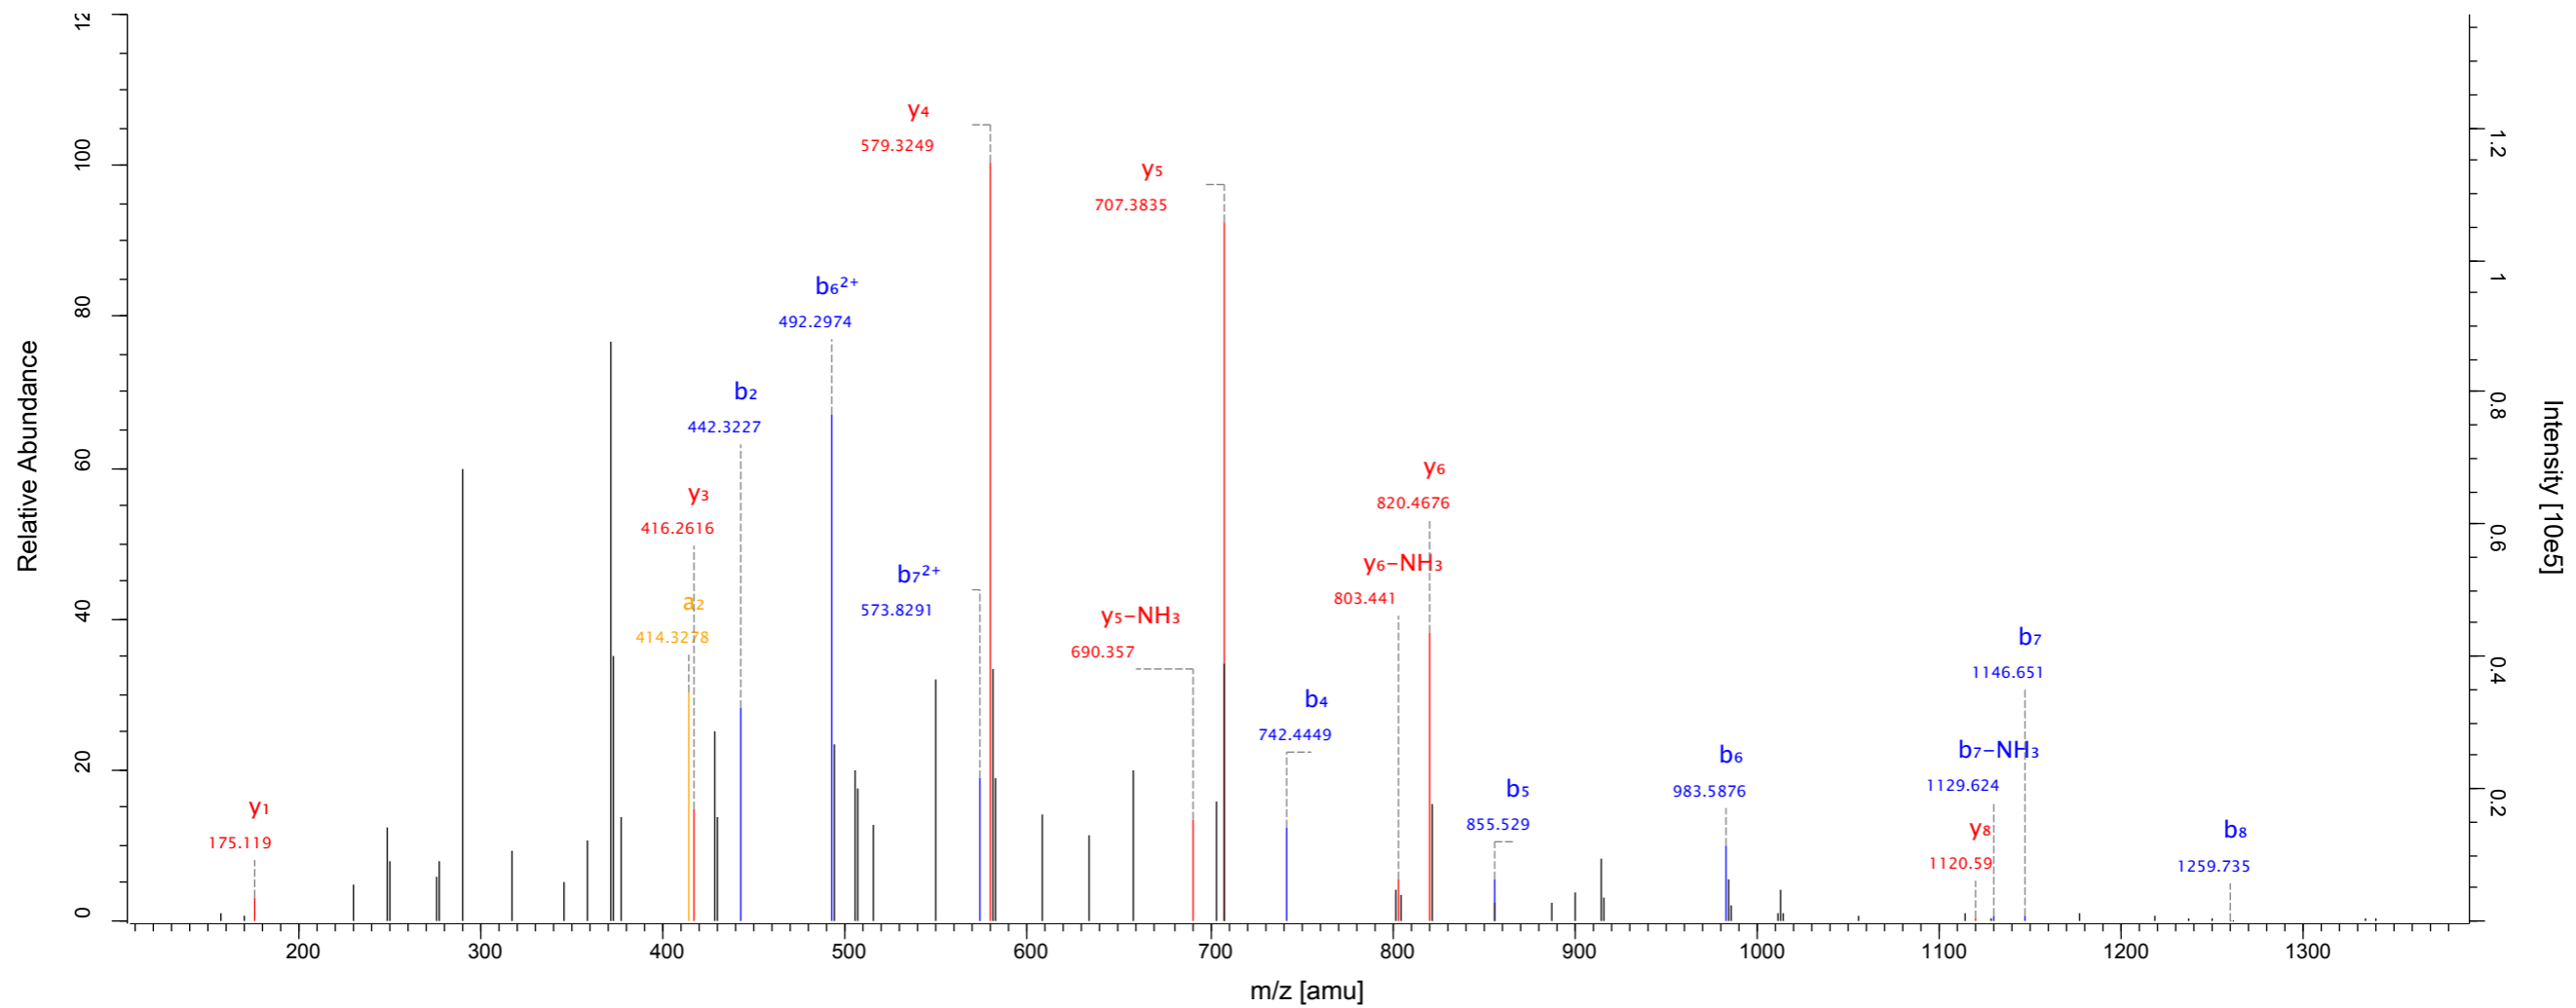

Source: mousePGCfemale-TMT6plex-group2-240ug-205min-19-20  
Scannumber: 24995  
Protein: Ndufa1; mCG\_116470; RP23-43O20.5-001; O35683; Q545K0  
Peptide Score: 183.67  
Method: ITMS; CID; 1

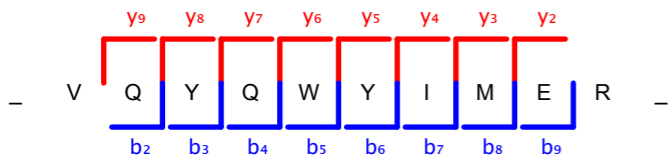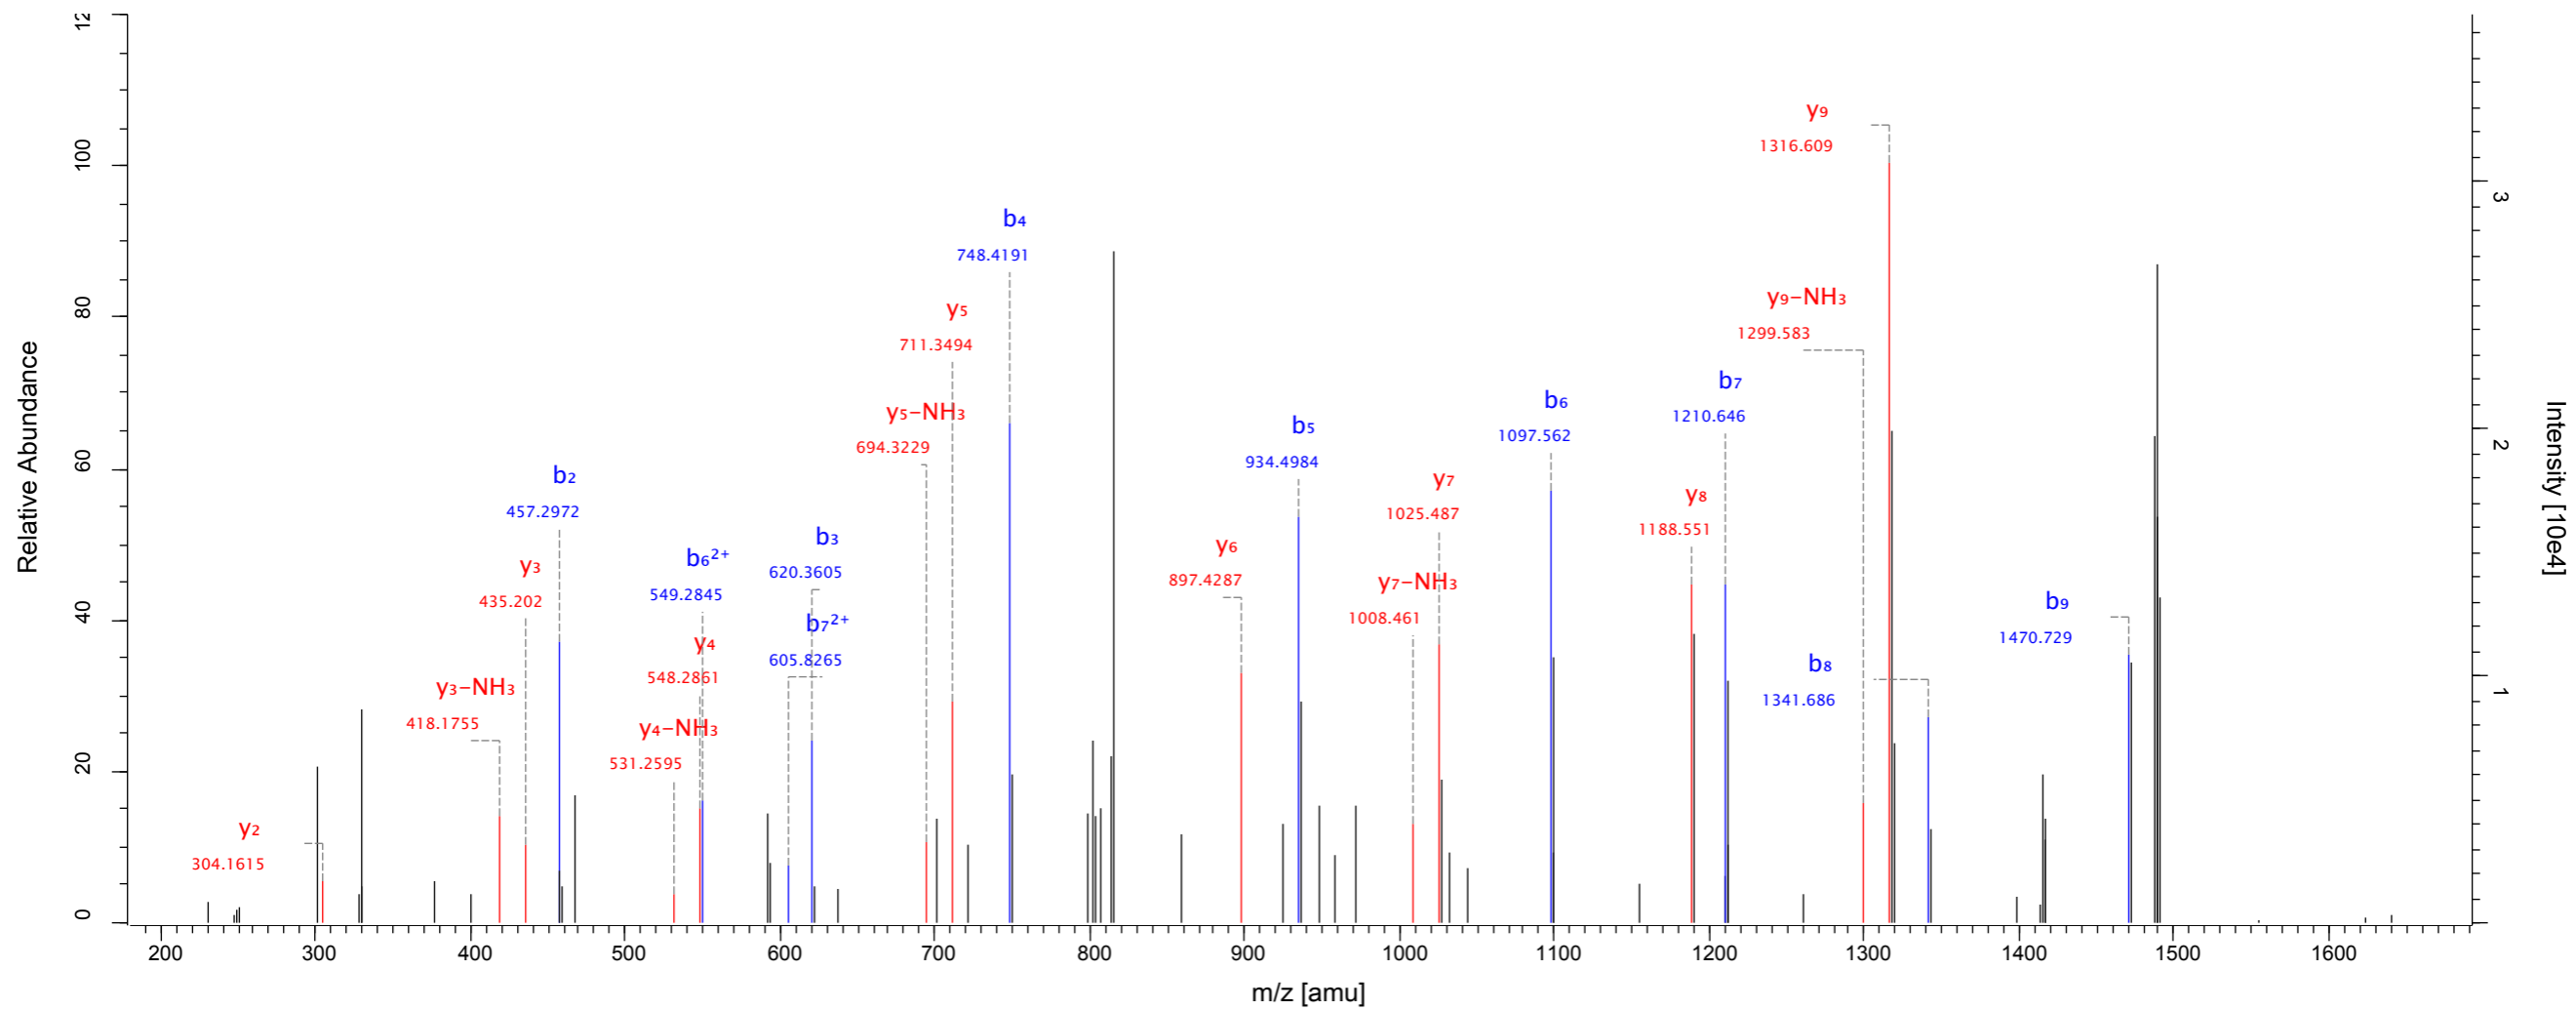

Source: mousePGCfemale-TMT6plex-group2-240ug-205min-19-20  
Scannumber: 27002  
Protein: Hps5; Ru2; Hps5; mKIAA1017; Hps5; Hps5; Ru2; P59438-1; P59438; Q640Q9; E9Q9Z2; Q6ZQ01; E9Q3X4; Q3TU08; P59438-2; P59438  
Peptide Score: 122.13  
Method: ITMS; CID; 1

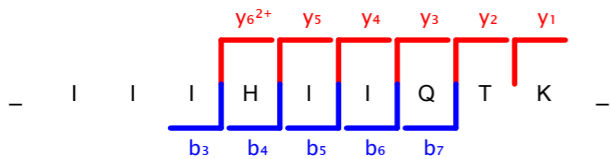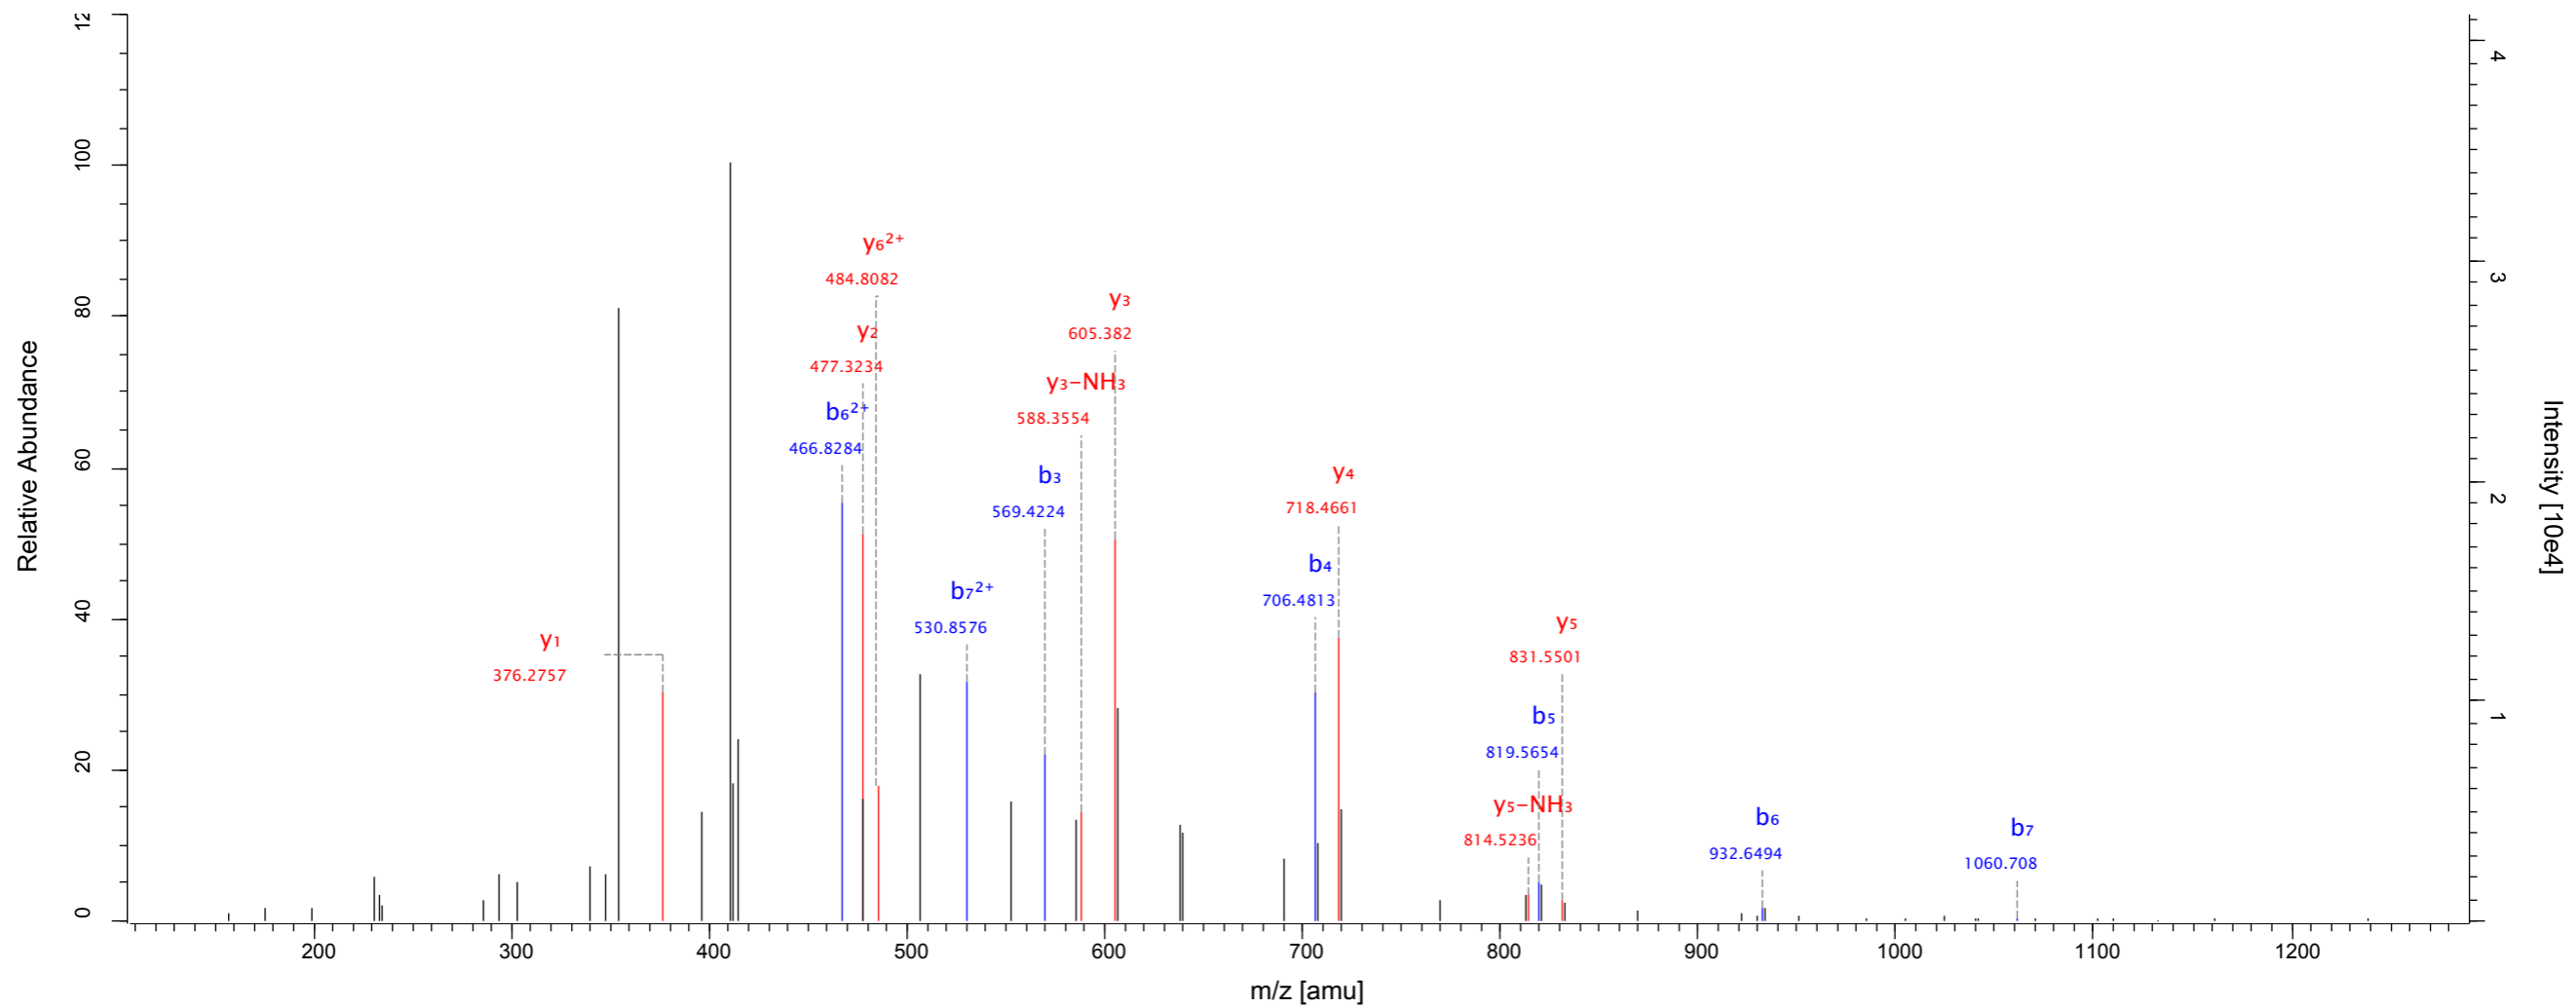

Source: mousePGCfemale-TMT6plex-group2-240ug-205min-19-20  
Scannumber: 29510  
Protein: Gnaq; P21279; Q3UHH5  
Peptide Score: 173.06  
Method: ITMS; CID; 1

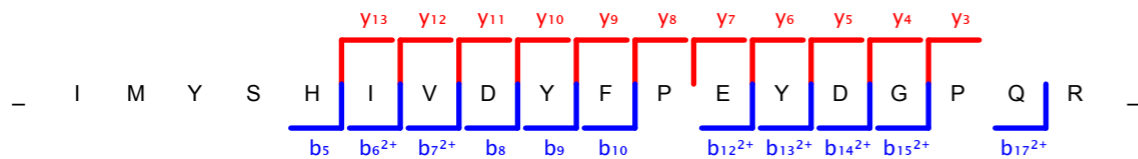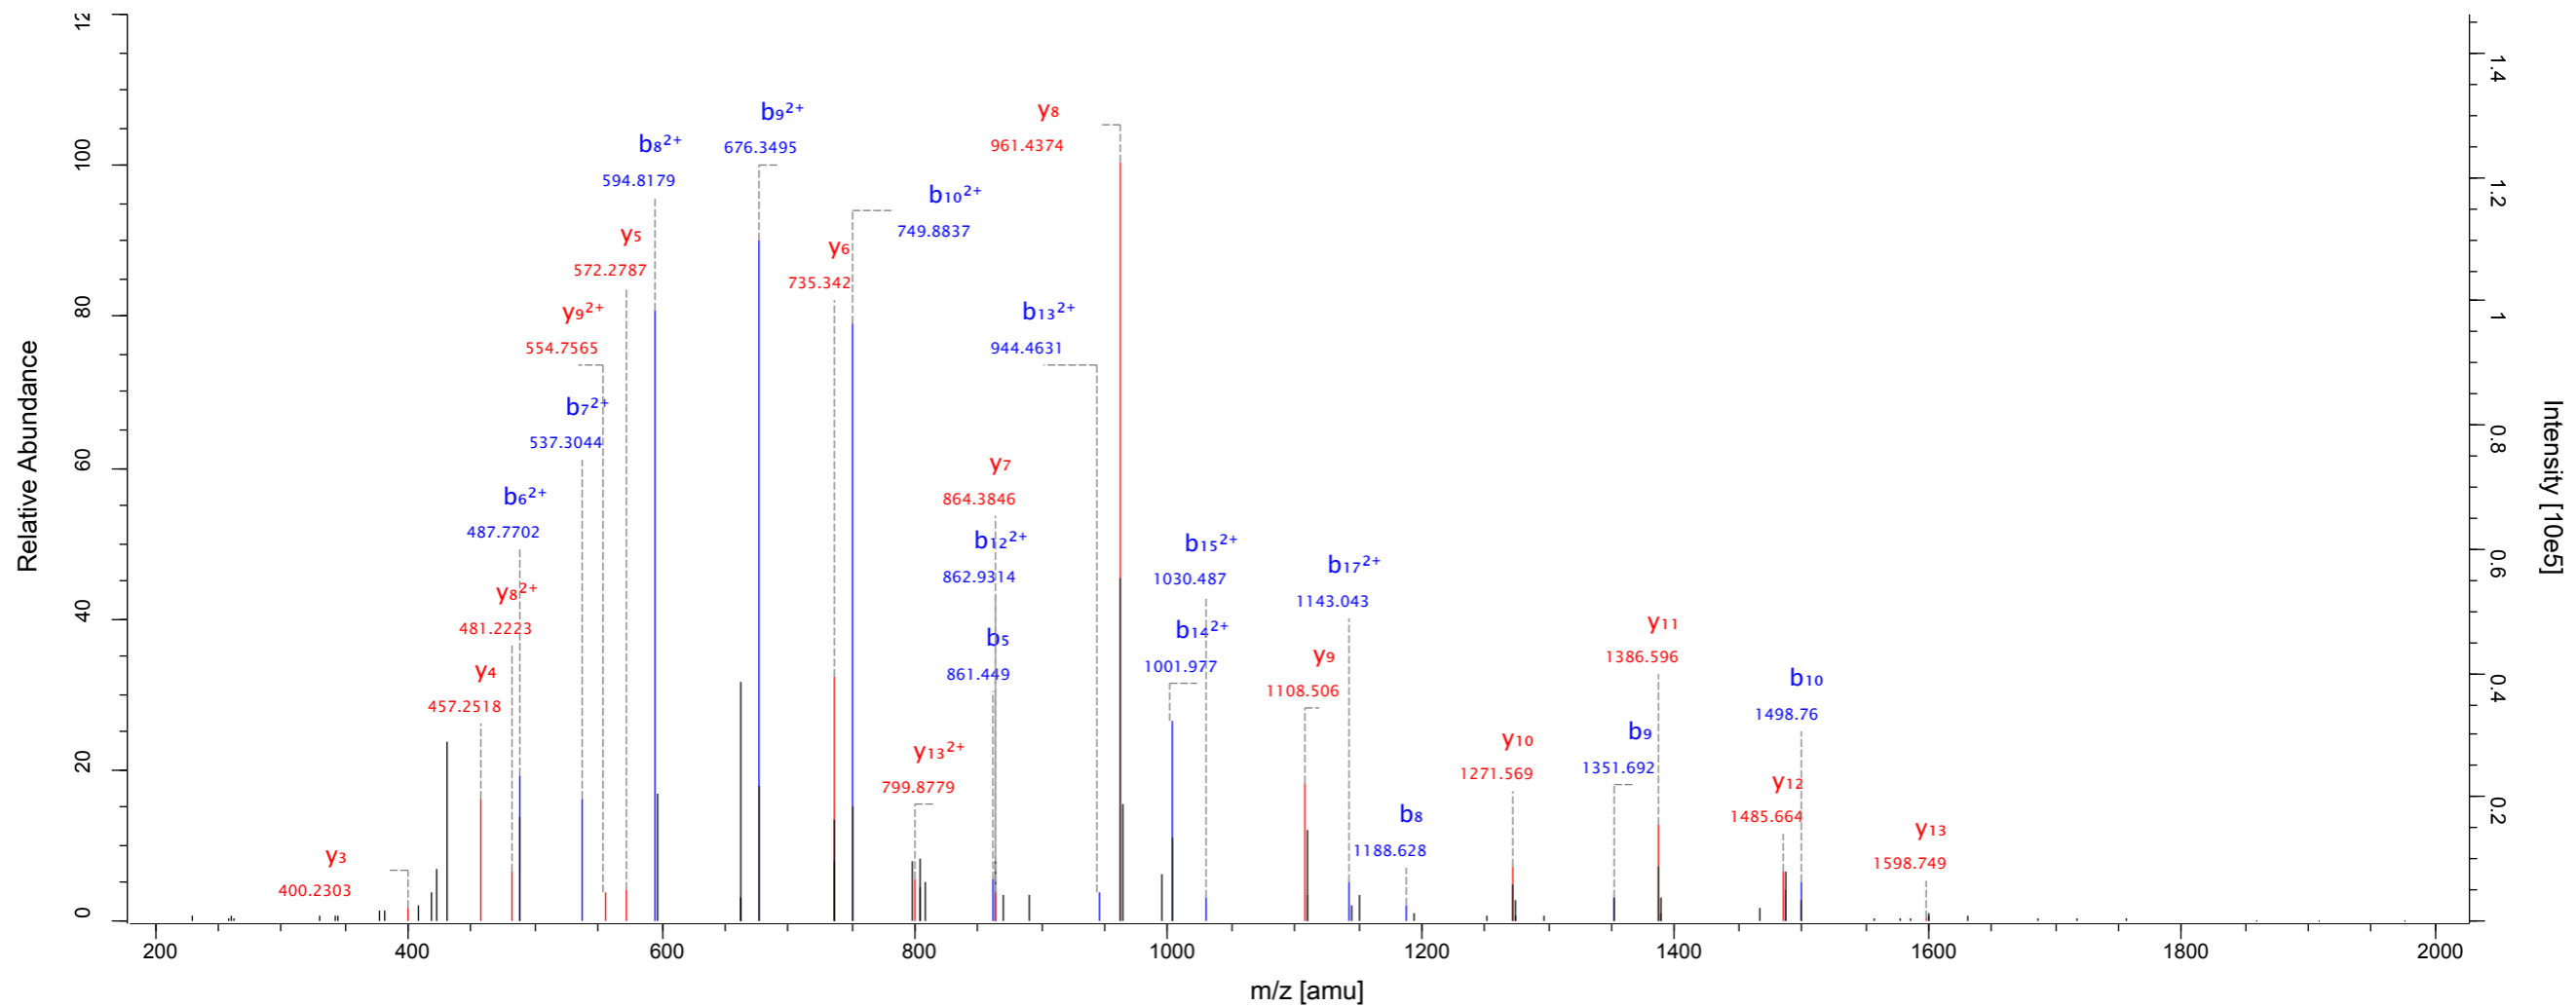

Source: mousePGCfemale-TMT6plex-group2-240ug-205min-21-22  
Scannumber: 15774  
Protein: Dcoh2; Dcohm; Pcbd2; Q9CZL5  
Peptide Score: 184.55  
Method: ITMS; CID; 1

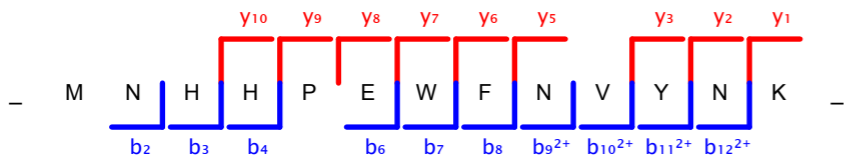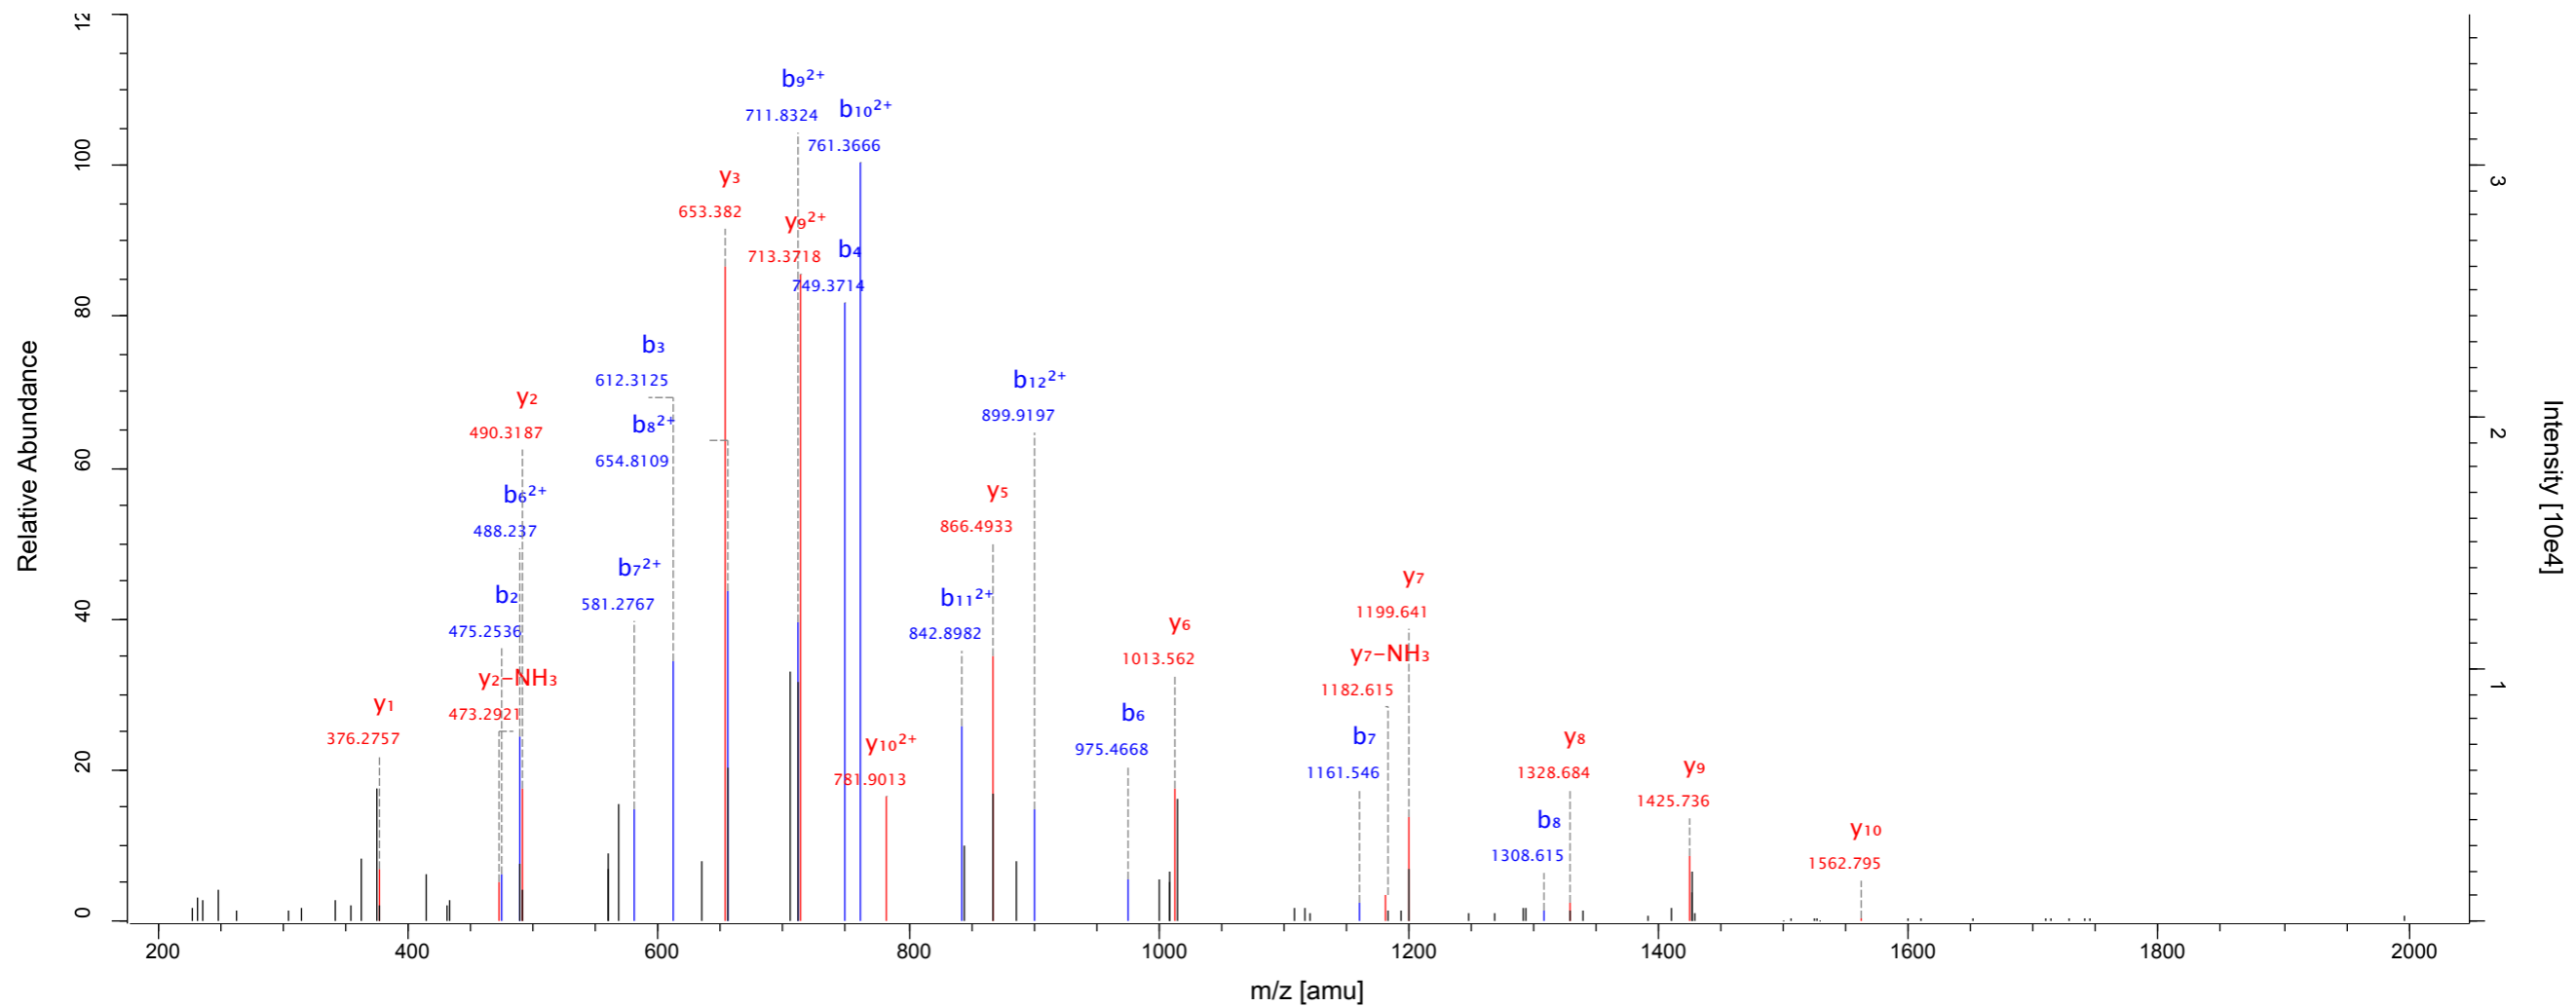

Source: mousePGCfemale-TMT6plex-group2-240ug-205min-21-22  
Scannumber: 16871  
Protein: Laman; Man2b; Man2b1; Manb; Man2b1; O09159; Q3TB95; Q3TBM1; Q3UGH3  
Peptide Score: 110.53  
Method: ITMS; CID; 1

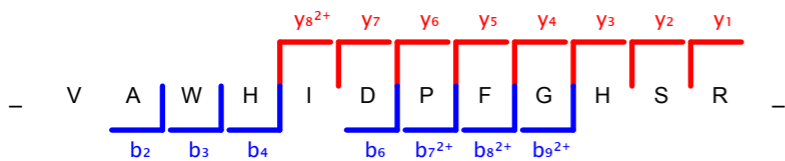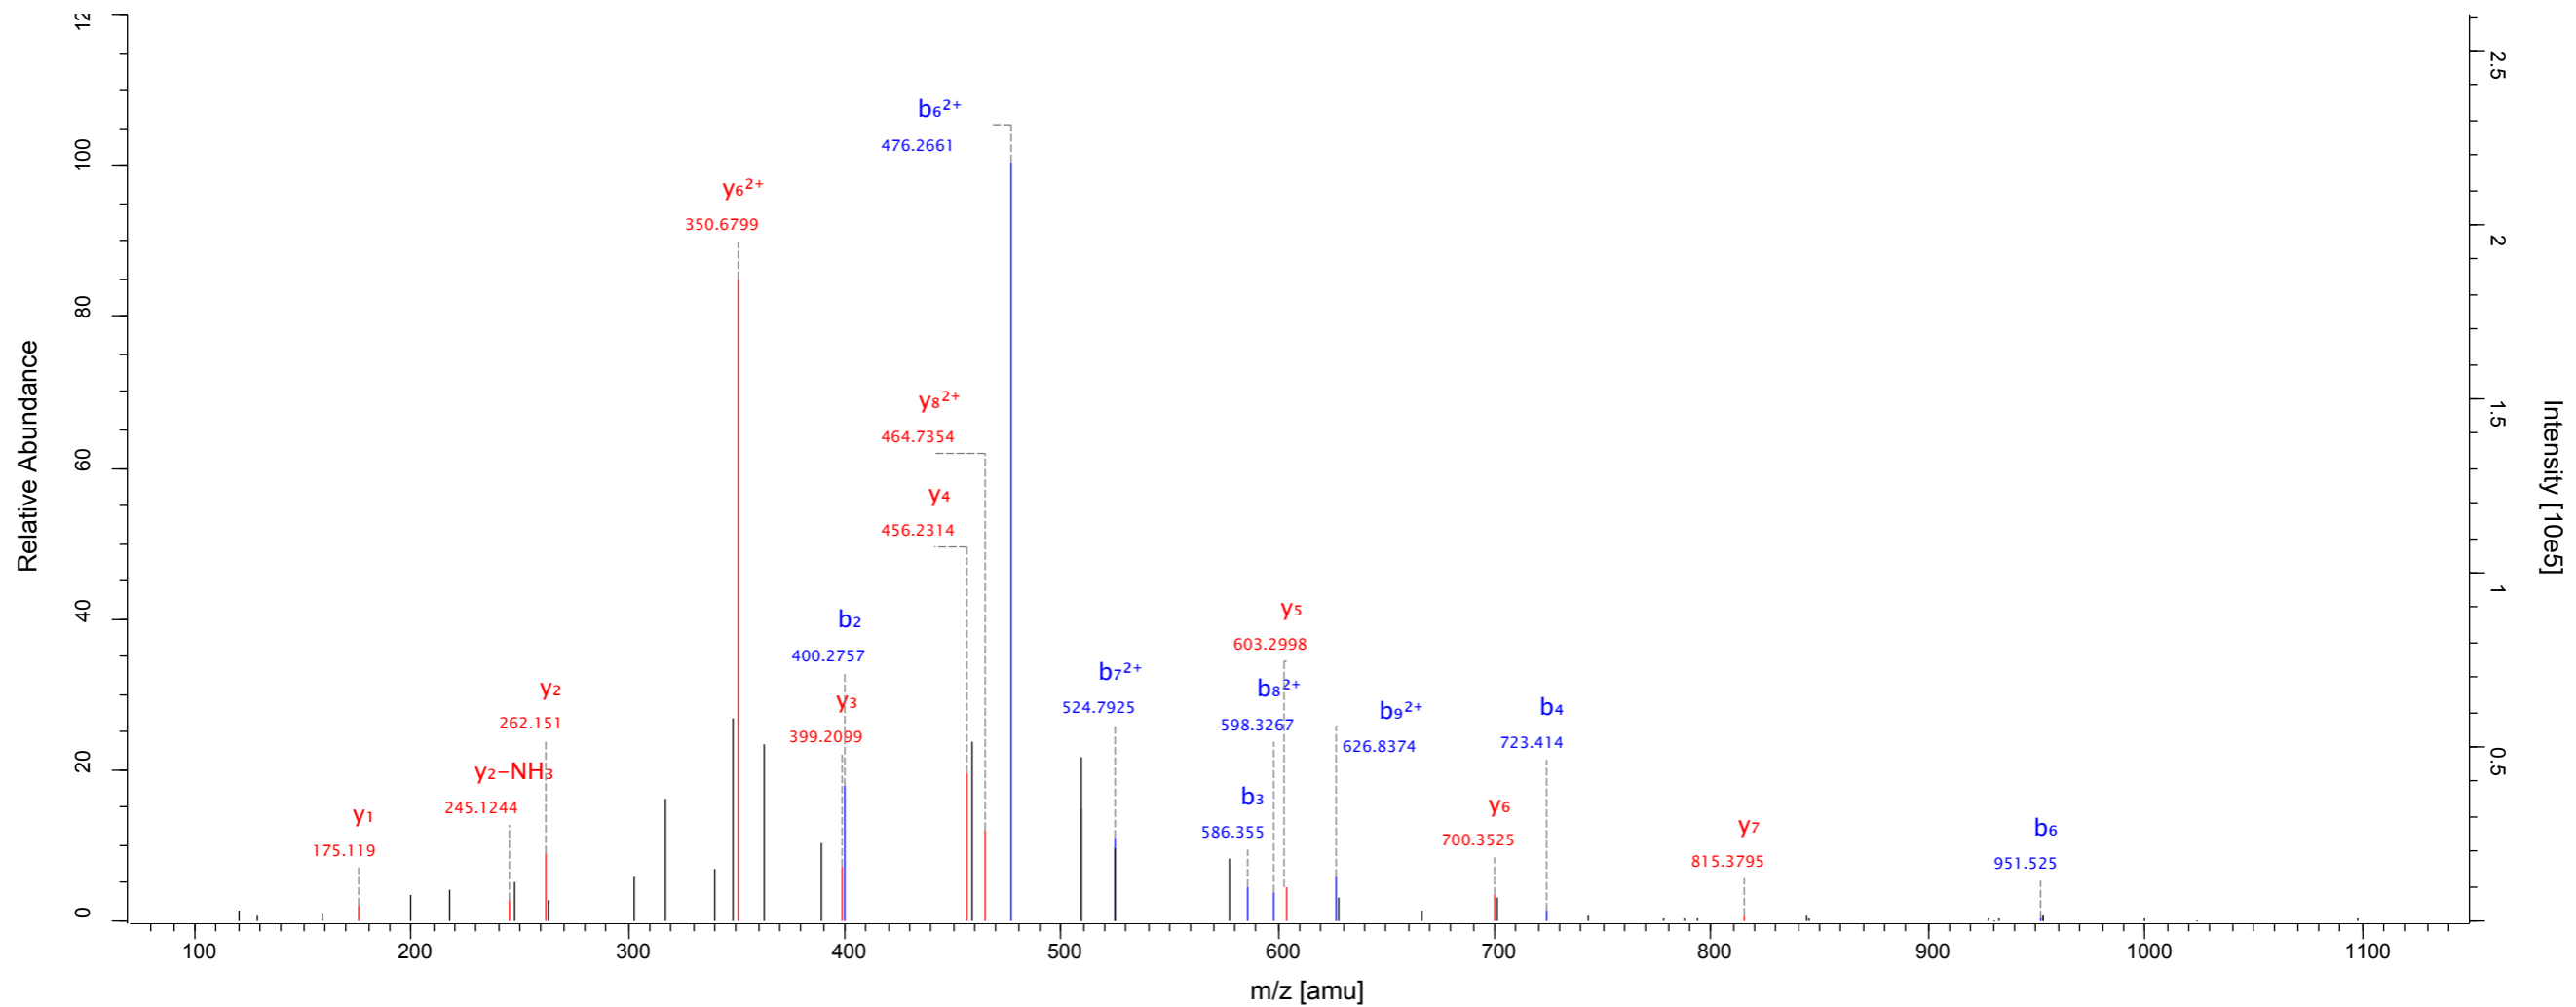

Source: mousePGCfemale-TMT6plex-group2-240ug-205min-21-22  
Scannumber: 22365  
Protein: Prmt10; Prmt10; Q3U3W5-2; Q3U3W5; D3YU52; Q3U3W5-1; Q3U3W5  
Peptide Score: 120.07  
Method: ITMS; CID; 1

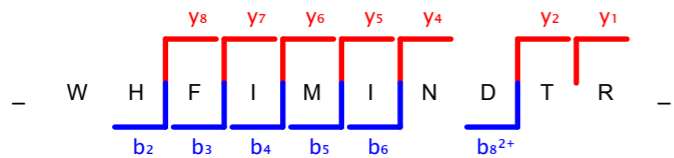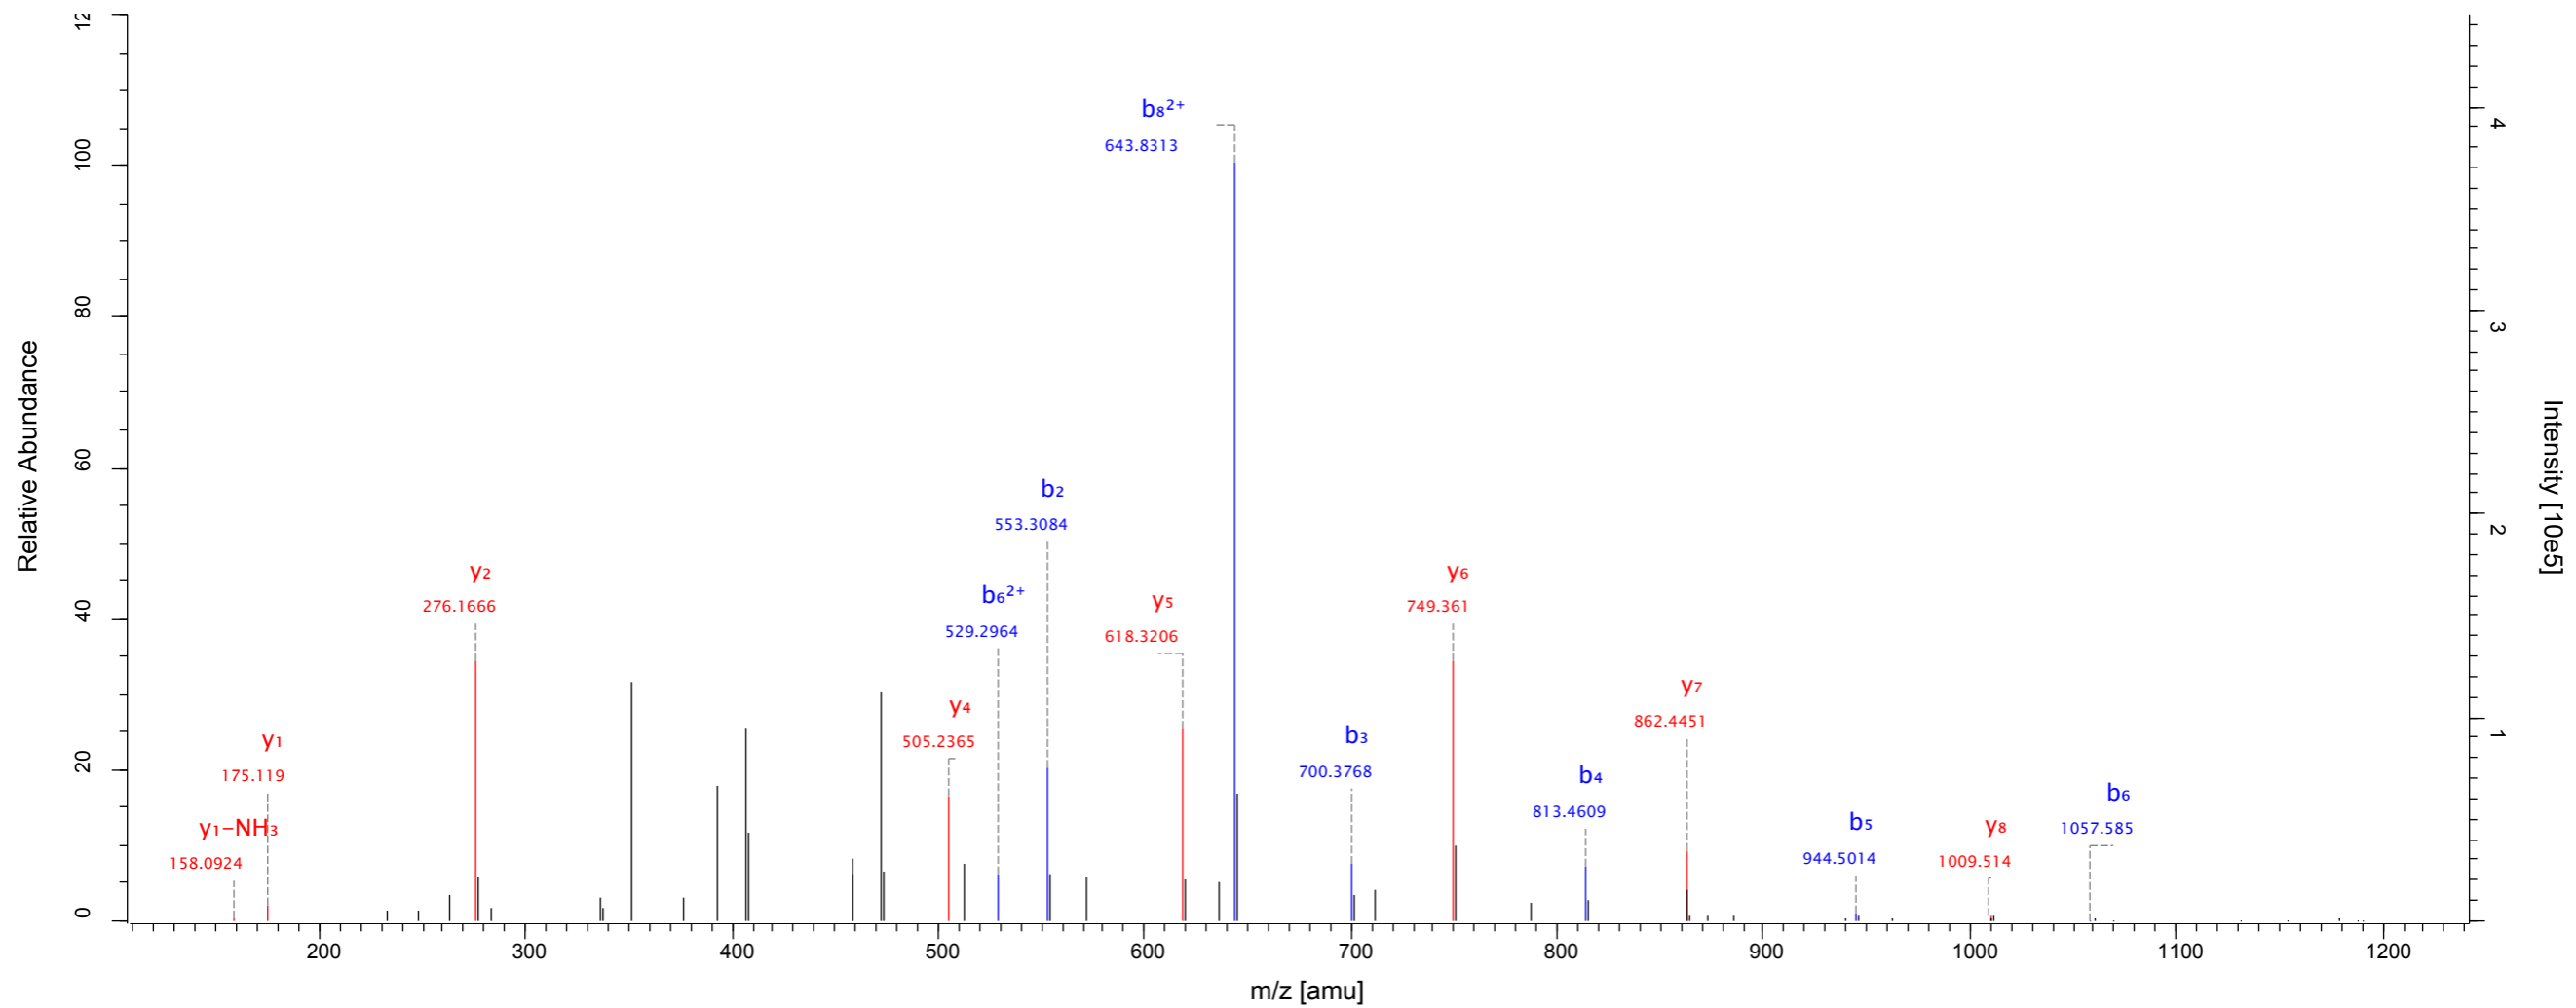



Source: mousePGCfemale-TMT6plex-group2-240ug-205min-21-22  
Scannumber: 28281  
Protein: Bub1; RP23-189N15.7-001; Bub1; Bub1; A2APR8; Q8K1K8; O08901; Q9CS10; Q8C4D0  
Peptide Score: 148.68  
Method: ITMS; CID; 1

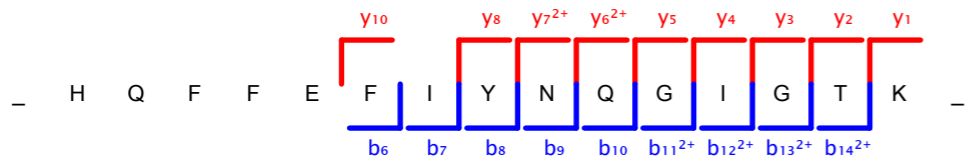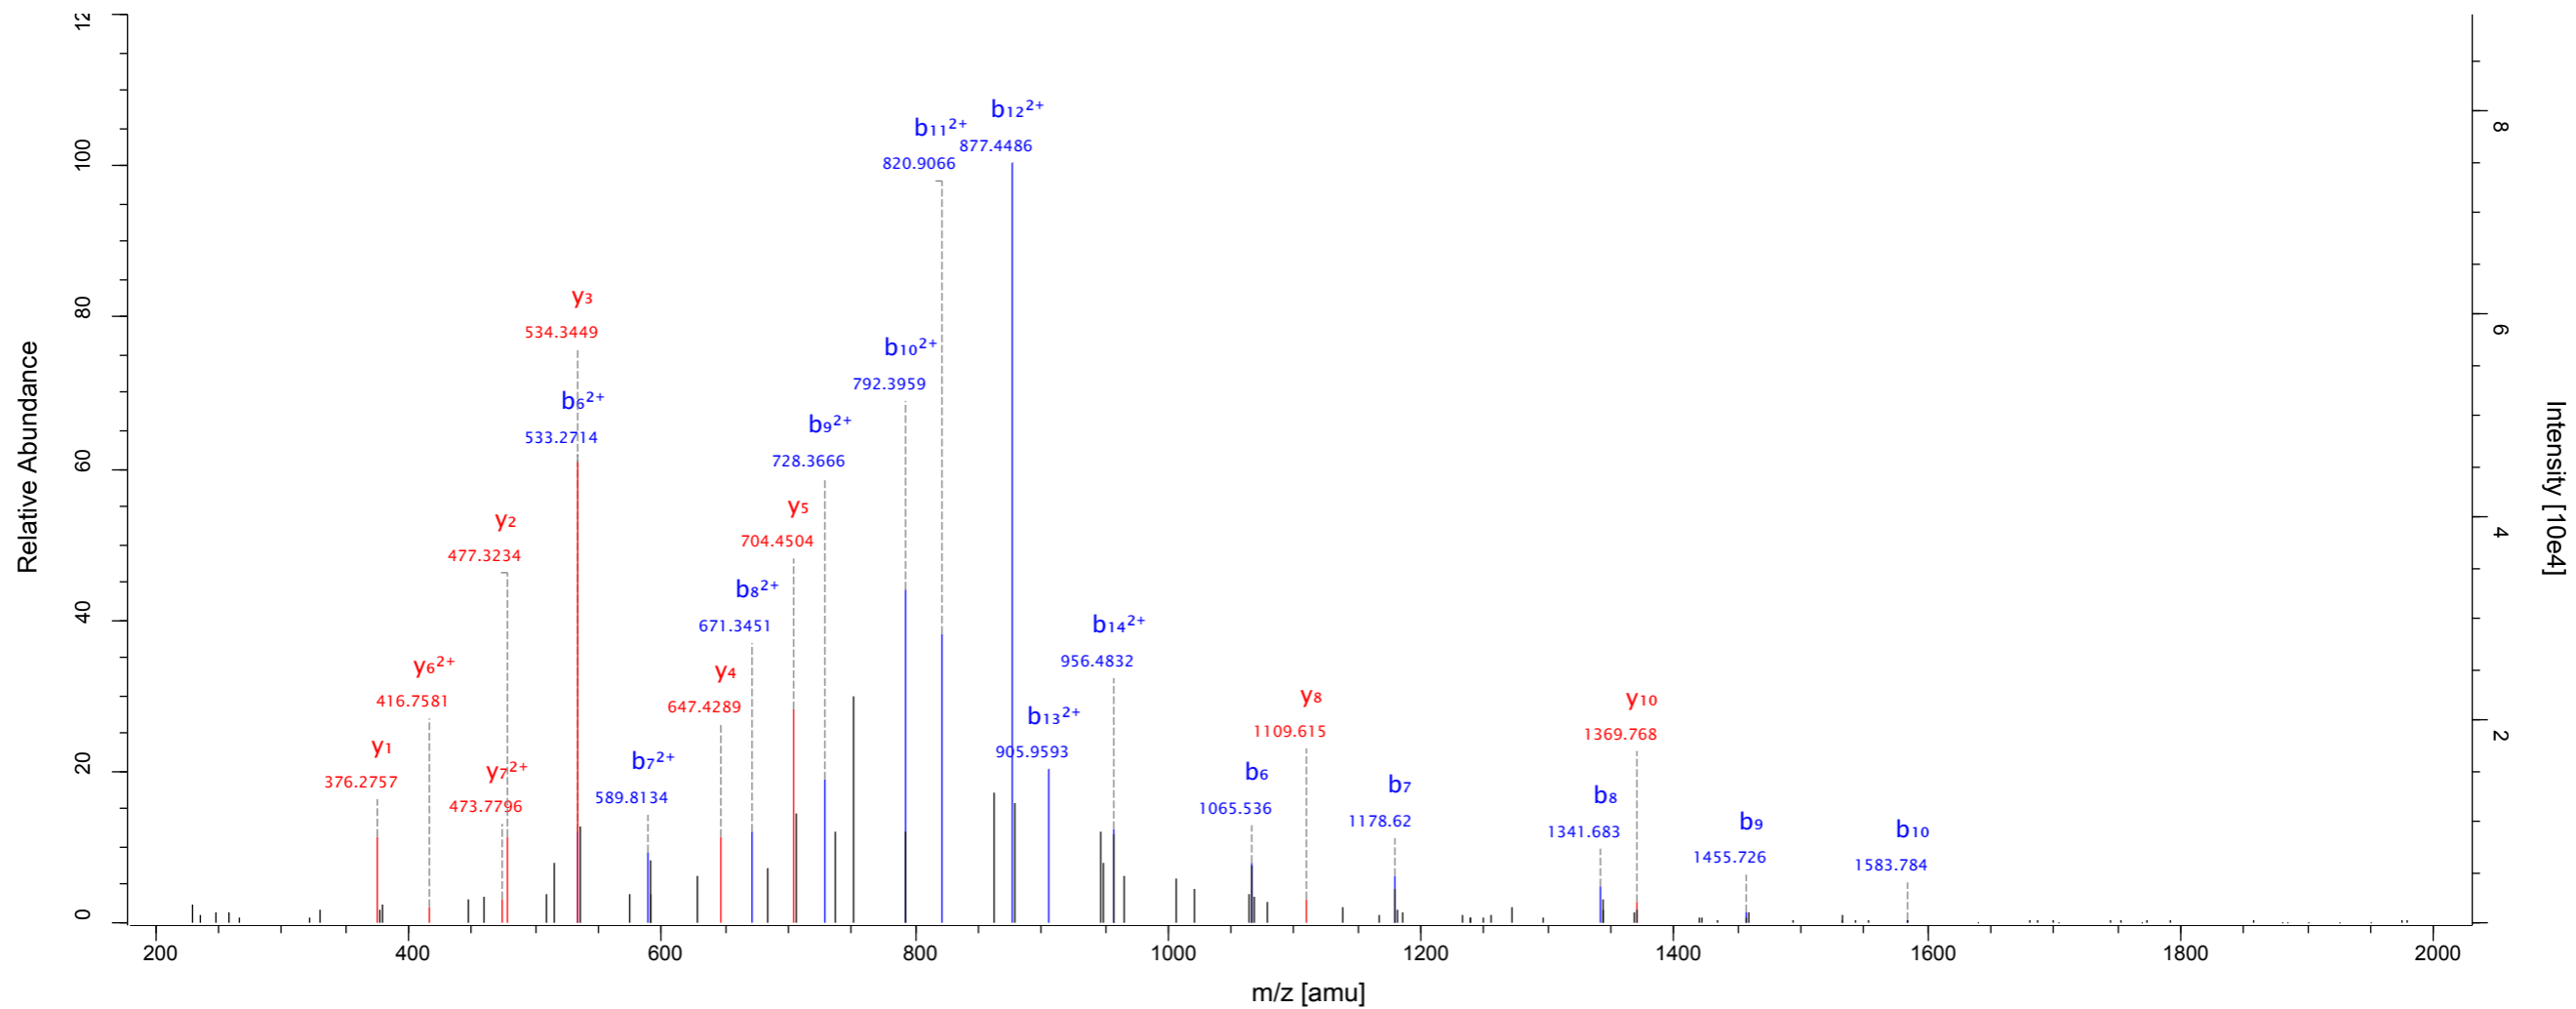

Source: mousePGCfemale-TMT6plex-group2-240ug-205min-23-24

Scannumber: 11043

Protein: Kiaa0358; Madd; RP23-20F9.4-001; Kiaa0358; Madd; Kiaa0358; Madd; Kiaa0358; Madd; RP23-20F9.4-011; Madd; RP23-20F9.4-002; Madd; RP23-20F9.4-010; Kiaa0358; Madd; Kiaa0358; Madd; RP23-20F9.4-004; Madd; RP23-20F9.4-003; Kiaa0358; Madd

Peptide Score: 114.4

Method: ITMS; CID; 1

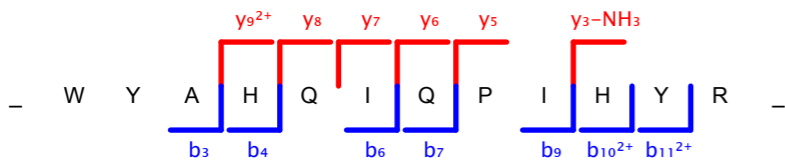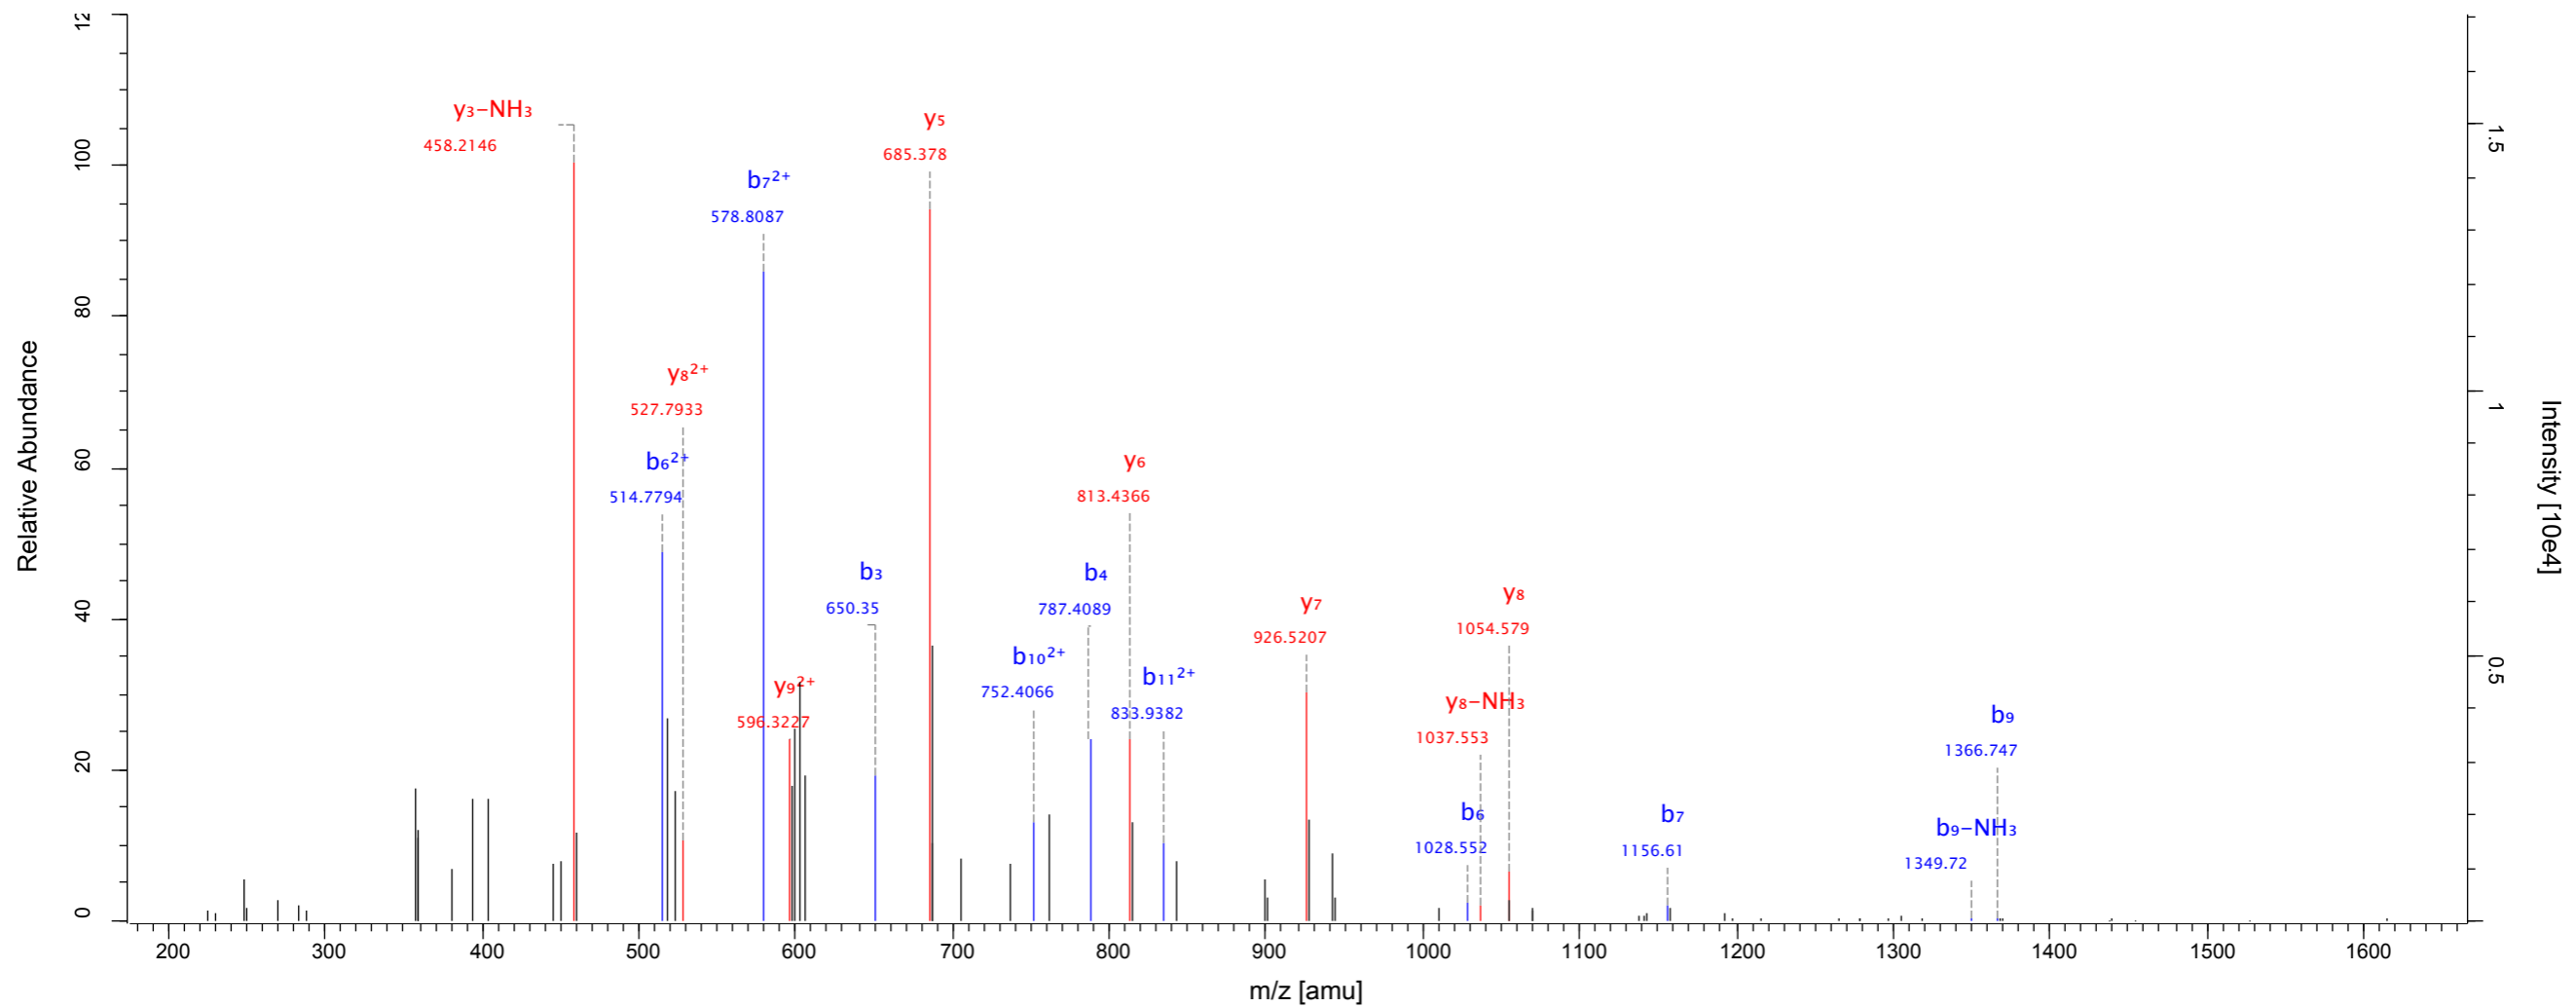

Source: mousePGCfemale-TMT6plex-group2-240ug-205min-23-24  
 Scannumber: 17128  
 Protein: Sdccag1; Sdccag1; Sdccag1; Q8CCP0-1; Q8CCP0; Q8CCP0-2; Q8CCP0; Q8CCP0-3; Q8CCP0  
 Peptide Score: 208.95  
 Method: ITMS; CID; 1

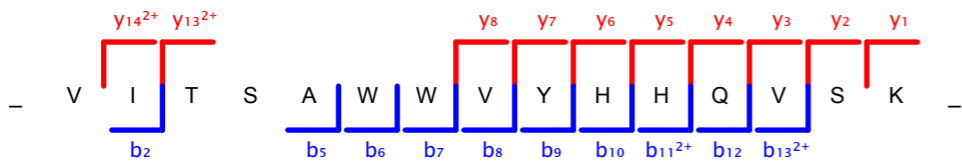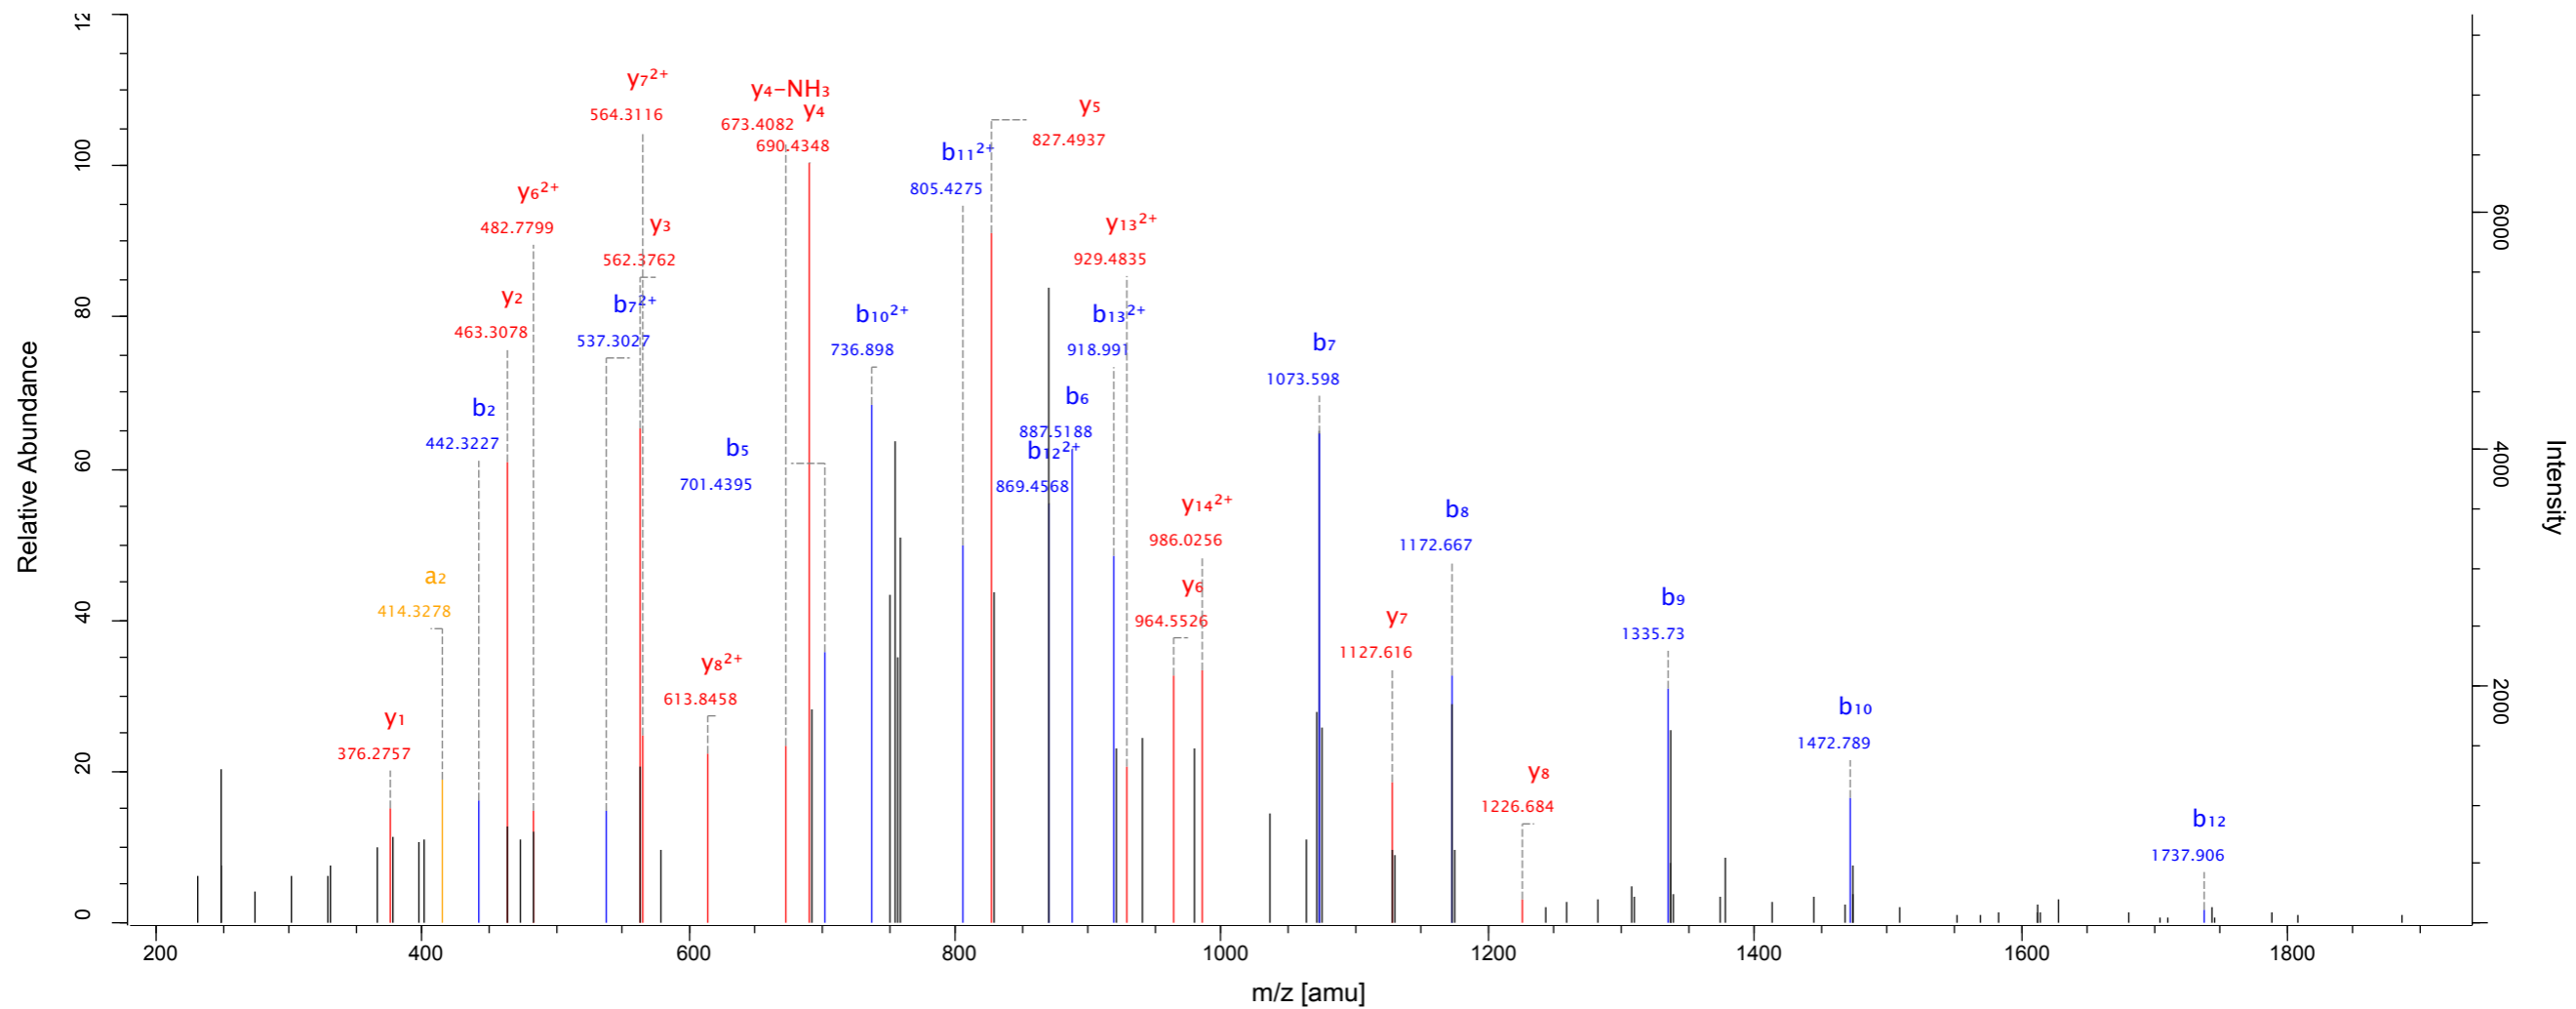

Source: mousePGCfemale-TMT6plex-group2-240ug-205min-23-24  
Scannumber: 19027  
Protein: Amz2; RP23-465A12.3-002; Amz2; RP23-465A12.3-001; Q400C8-1; Q400C8; B1AT59; Q400C8-2; Q400C8; B1AT60  
Peptide Score: 103.91  
Method: ITMS; CID; 1

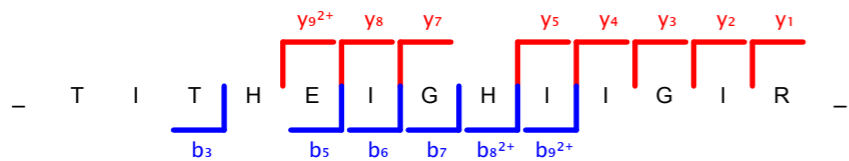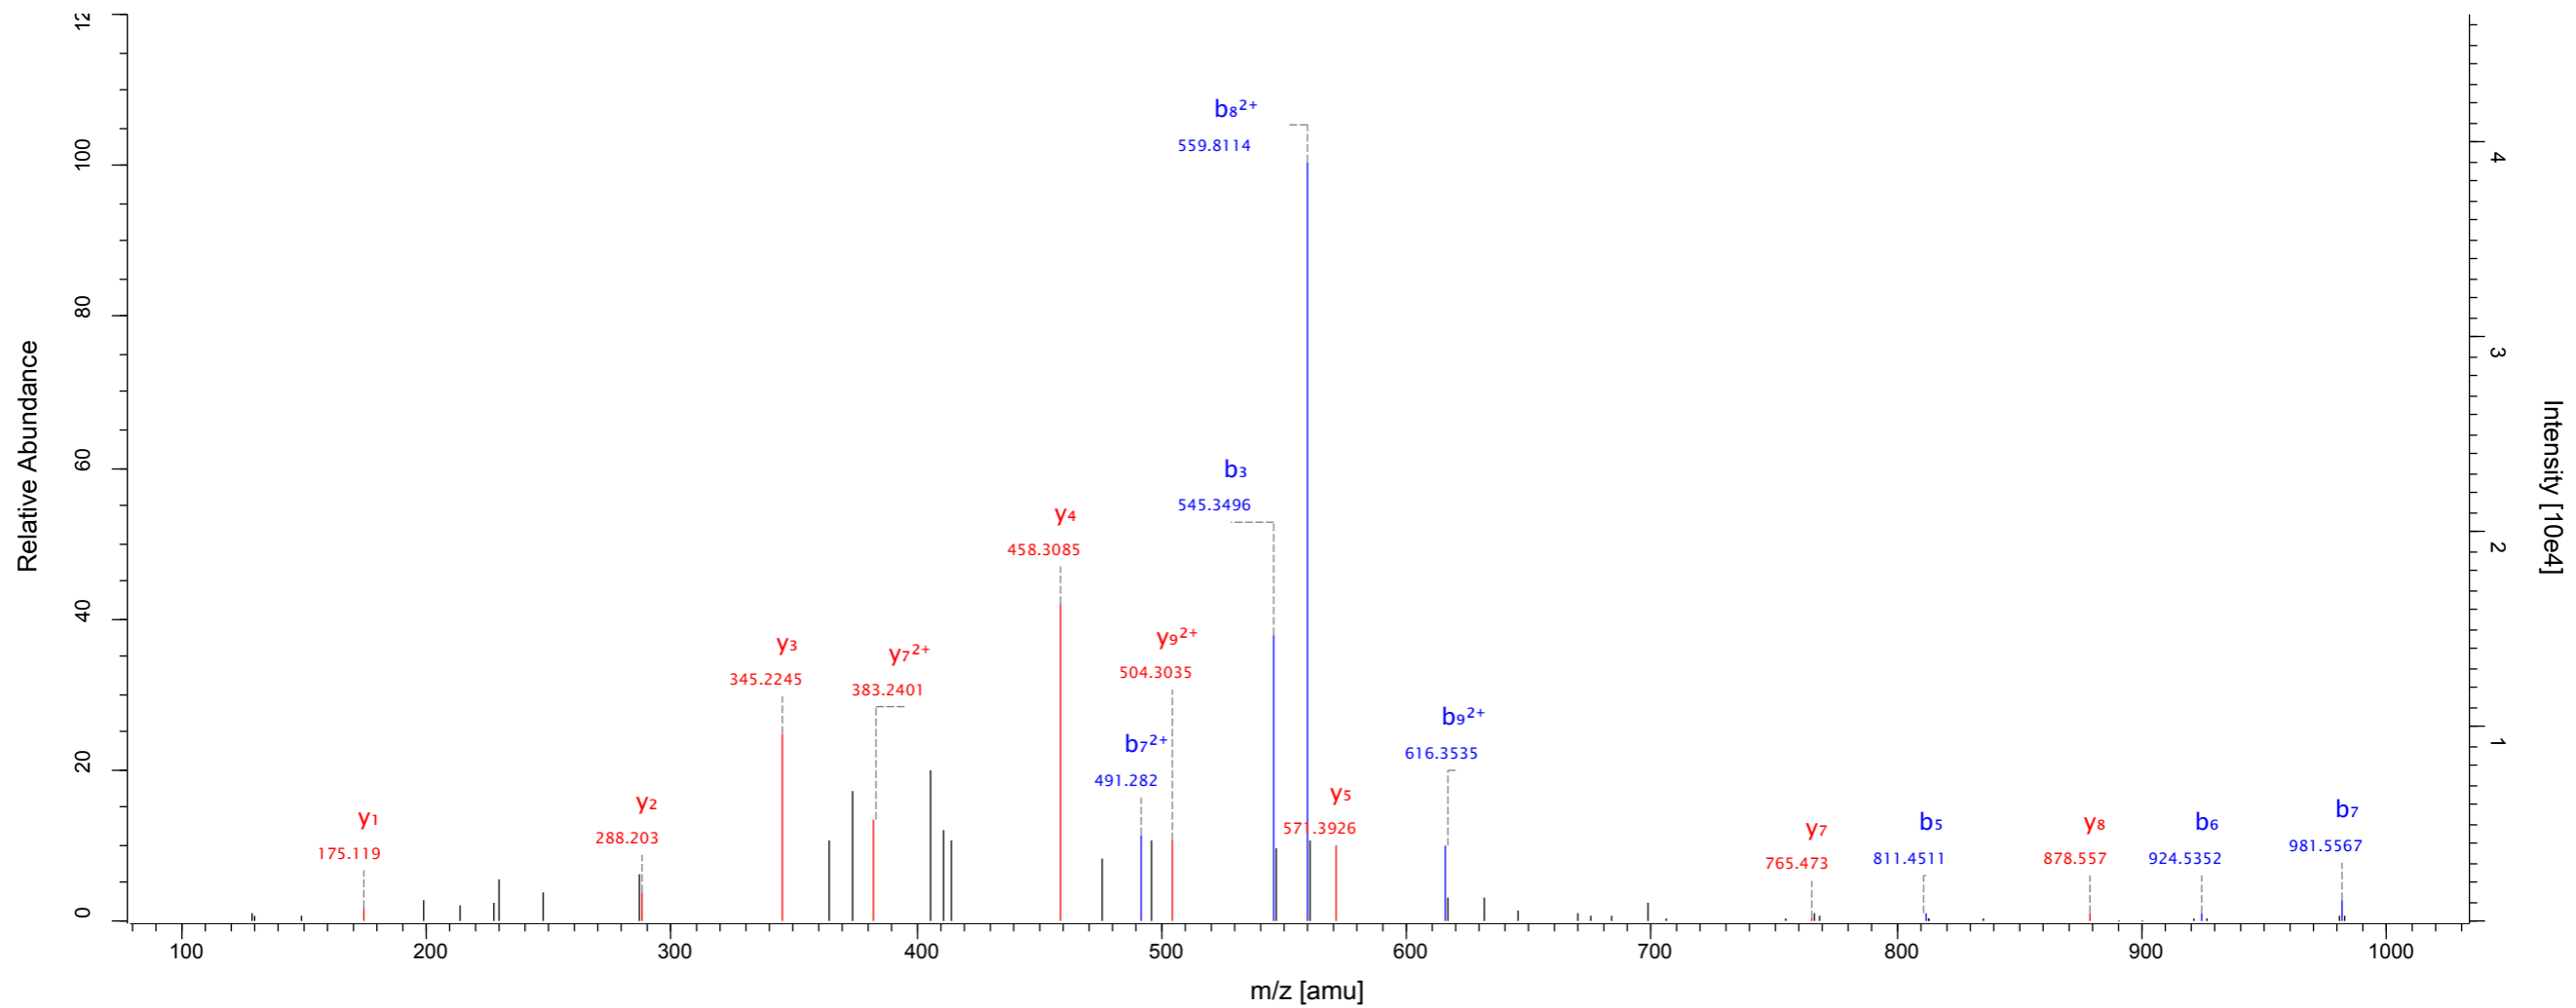

Source: mousePGCfemale-TMT6plex-group2-240ug-205min-23-24  
Scannumber: 27105  
Protein: Kiaa0193; Scrn1; Q9CZC8  
Peptide Score: 133.05  
Method: ITMS; CID; 1

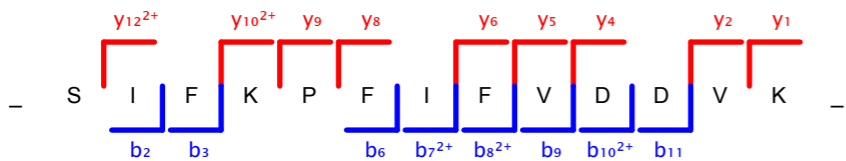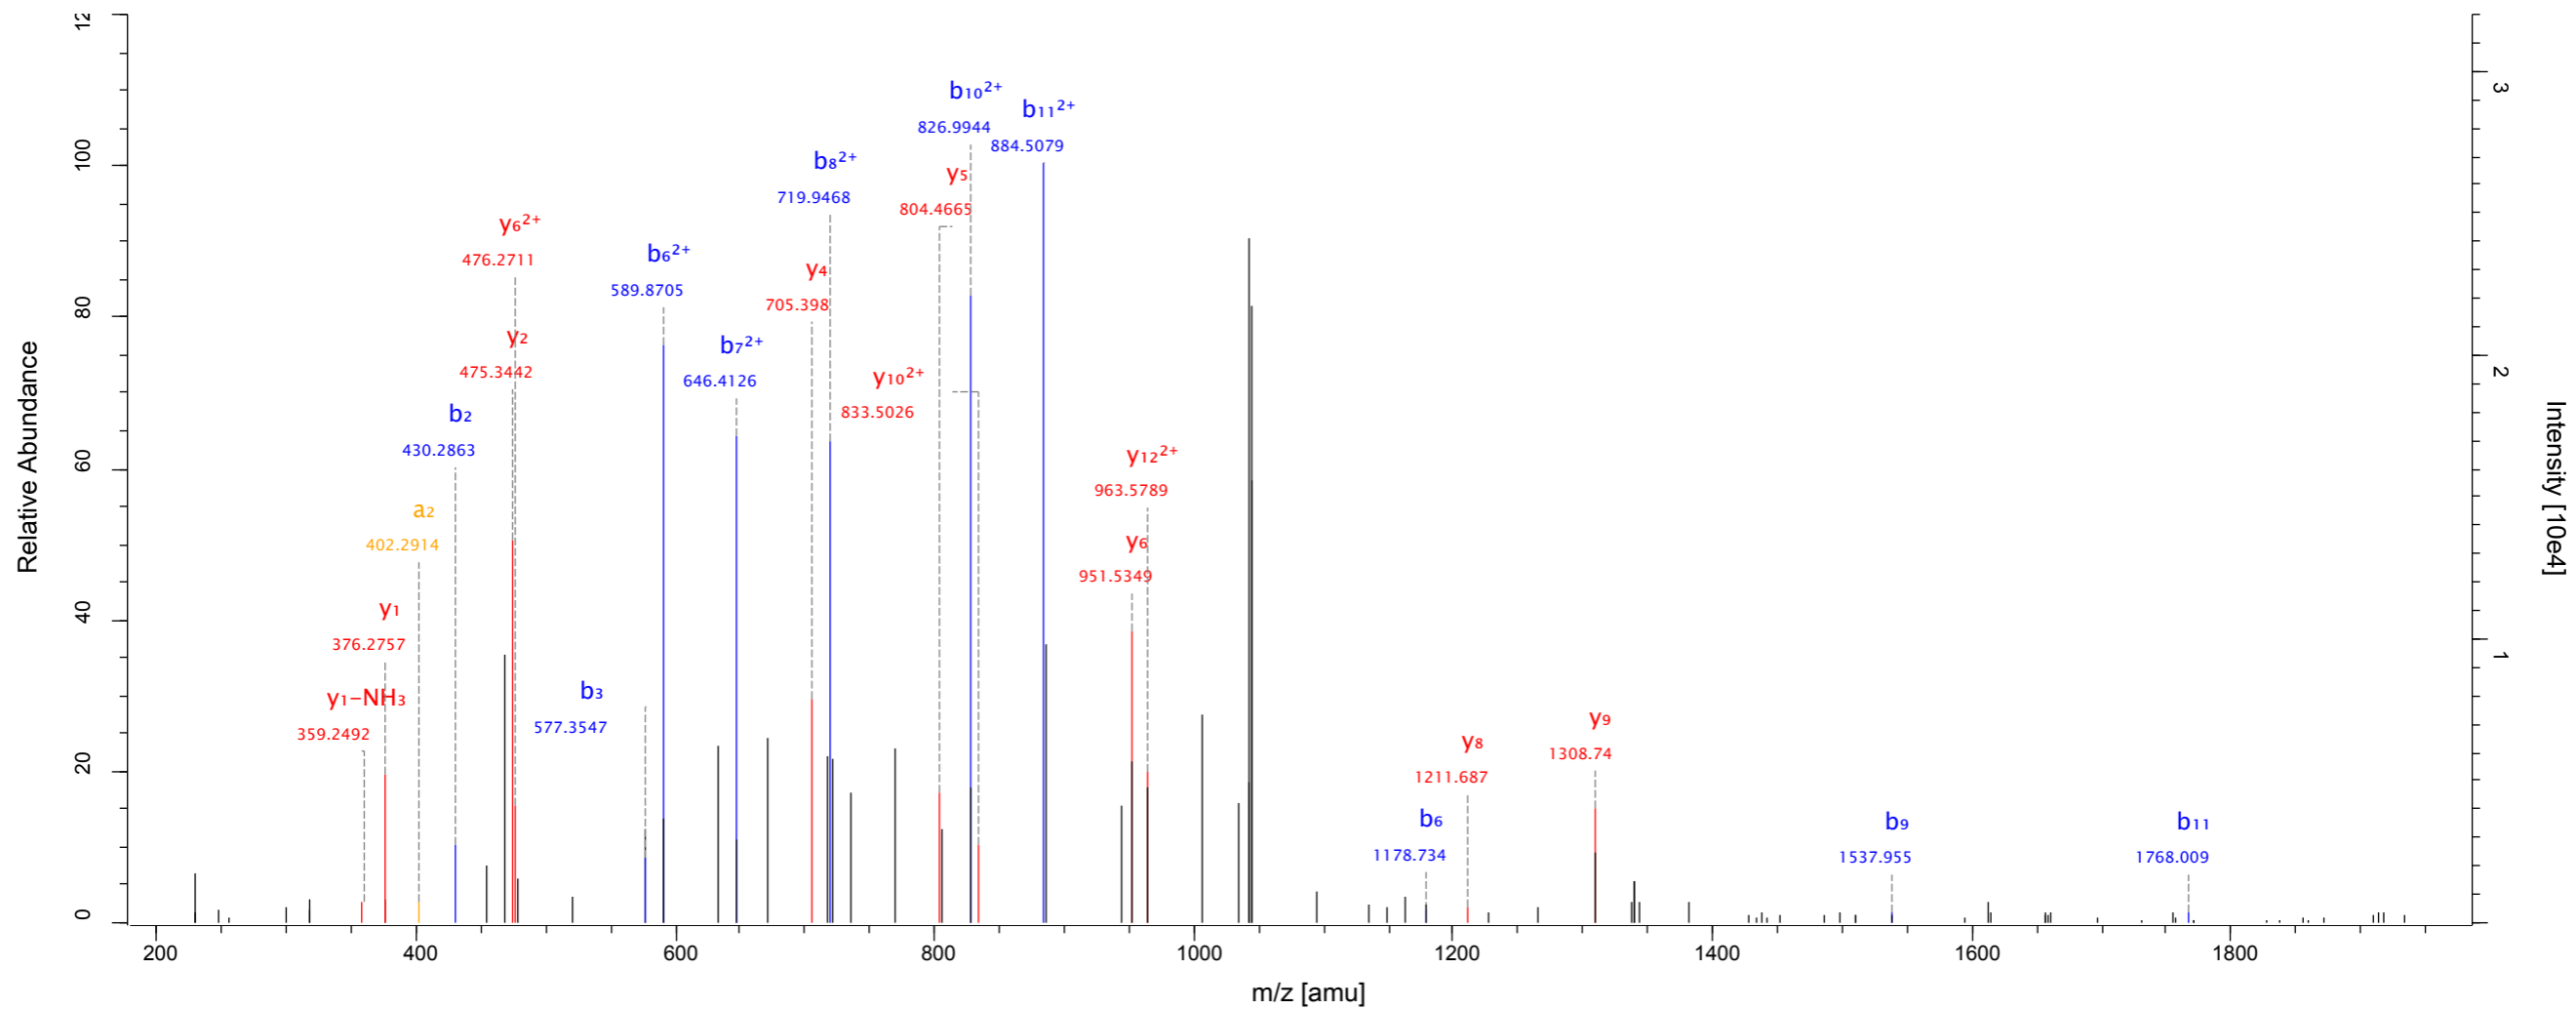

Source: mousePGCfemale-TMT6plex-group2-240ug-205min-25-26  
Scannumber: 22070  
Protein: Tsg101; mCG\_123182; CC2; Tsg101; Tsg101; Q61187; Q3UCW0; Q3UK08; Q6LBE4; D3Z0S9; D3Z2V5  
Peptide Score: 147.51  
Method: ITMS; CID; 1

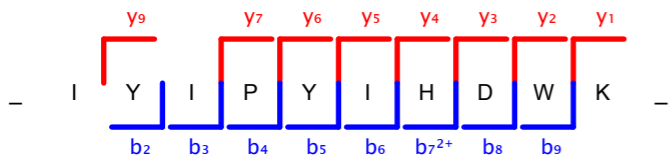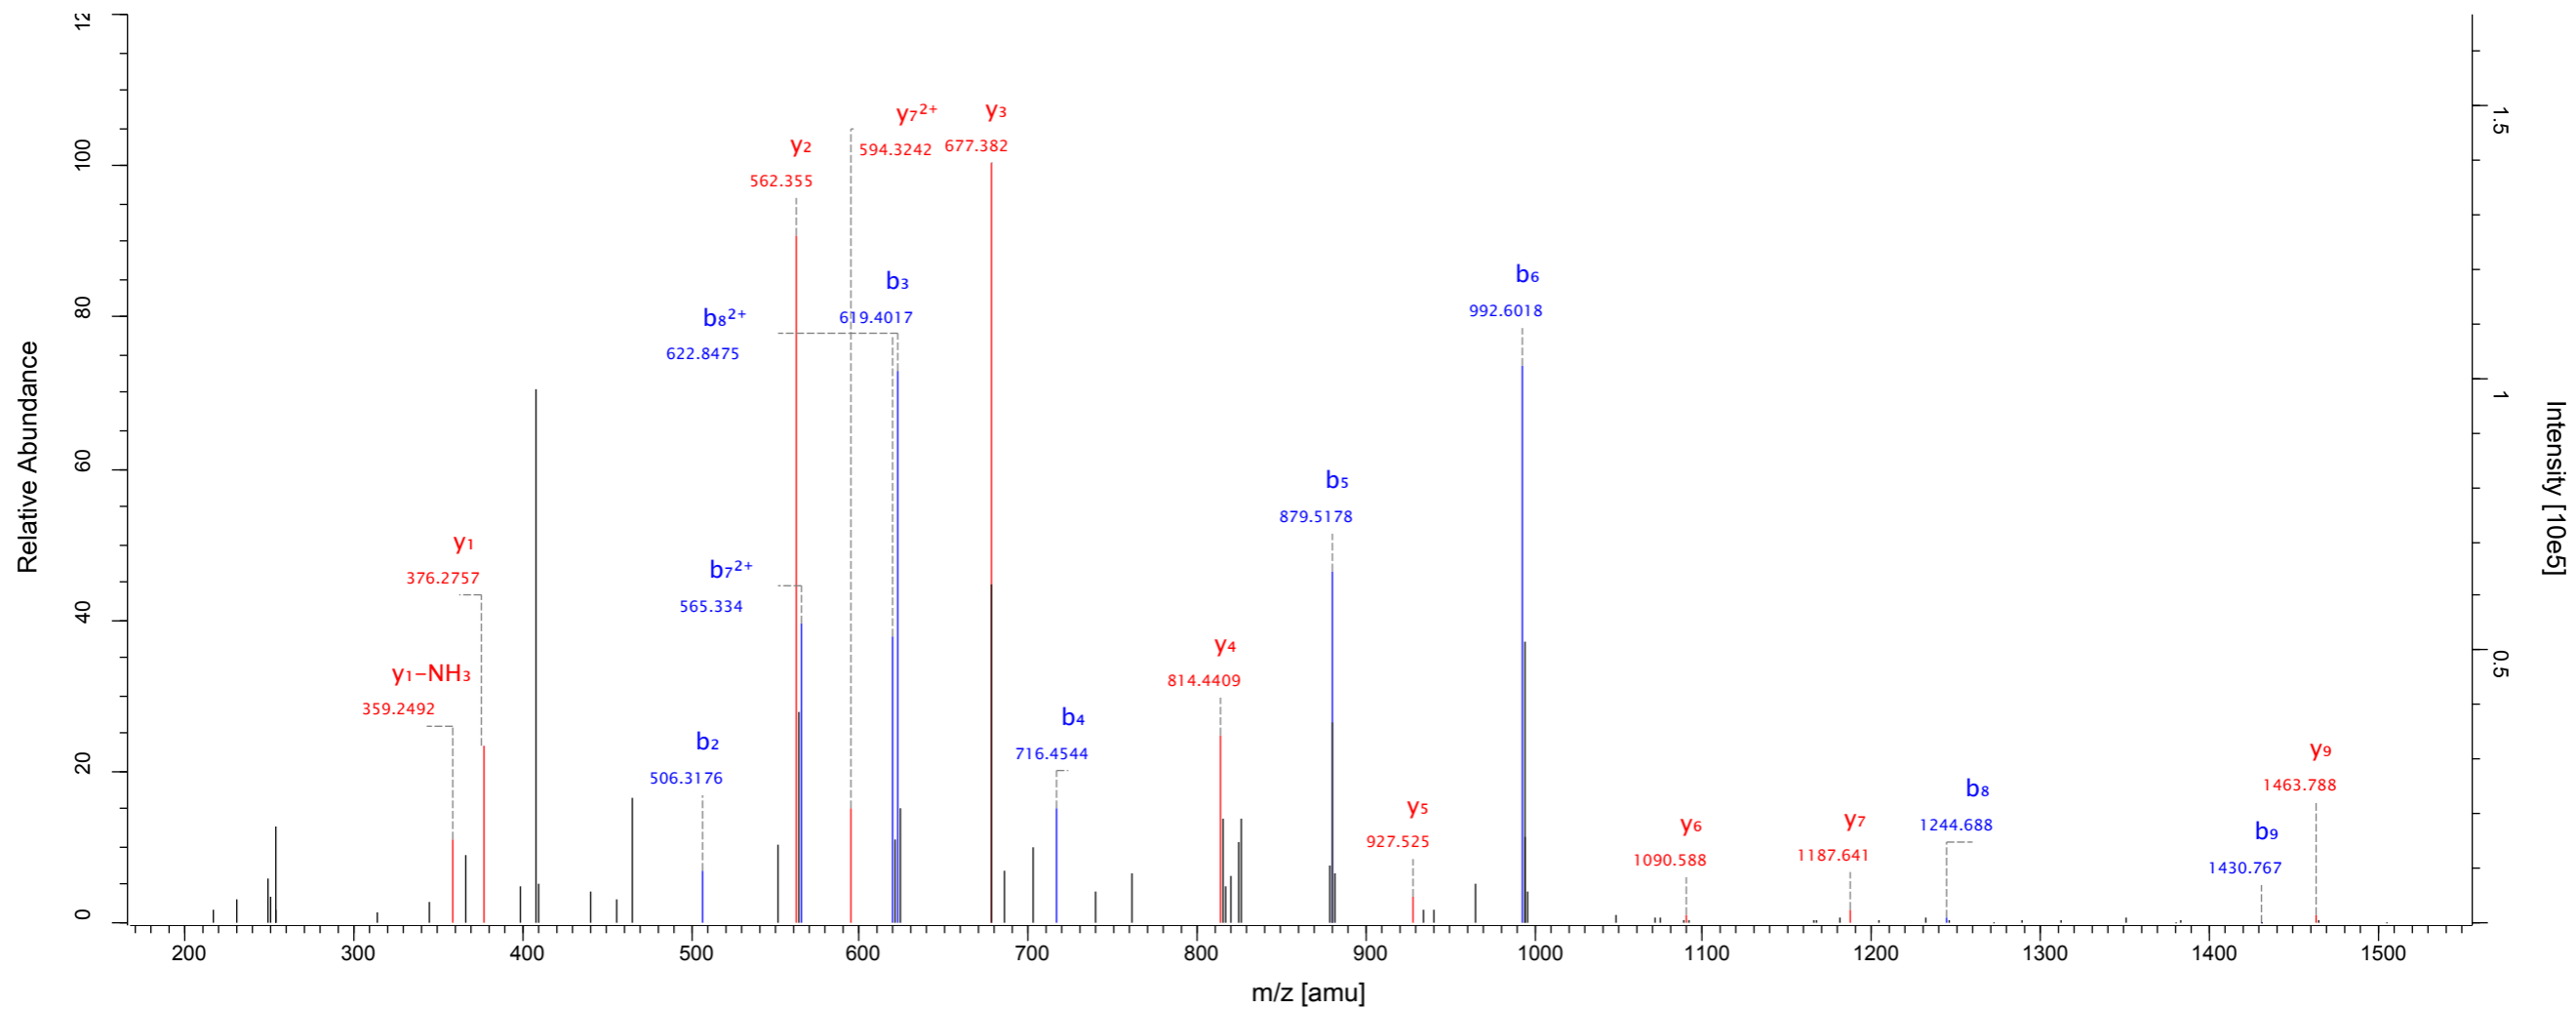

Source: mousePGCfemale-TMT6plex-group2-240ug-205min-25-26

Scannumber: 24627

Protein: COXI; mt-Co1; COI; COX1; COI; mt-Co1; Mtco1; A5YMU1; A5YMZ2; A5YMZ3; A5YMZ4; A5YMZ5; A5YMZ6; A5YMZ7; A5YMZ8; A5YMZ9; A5YN00; B3IYS1; D6R472; D9D7W1; Q35042; Q3TML7; Q3TRT0; Q3UQ58; Q3UR21; Q3UTW3; Q5BP84; Q5BP85; Q5BP88

Peptide Score: 178.71

Method: ITMS; CID; 1

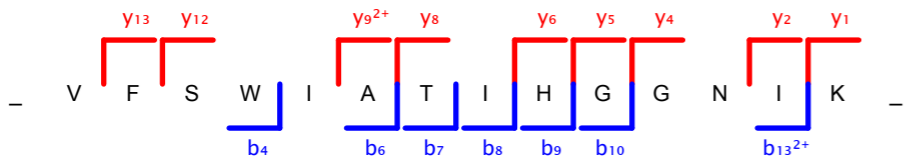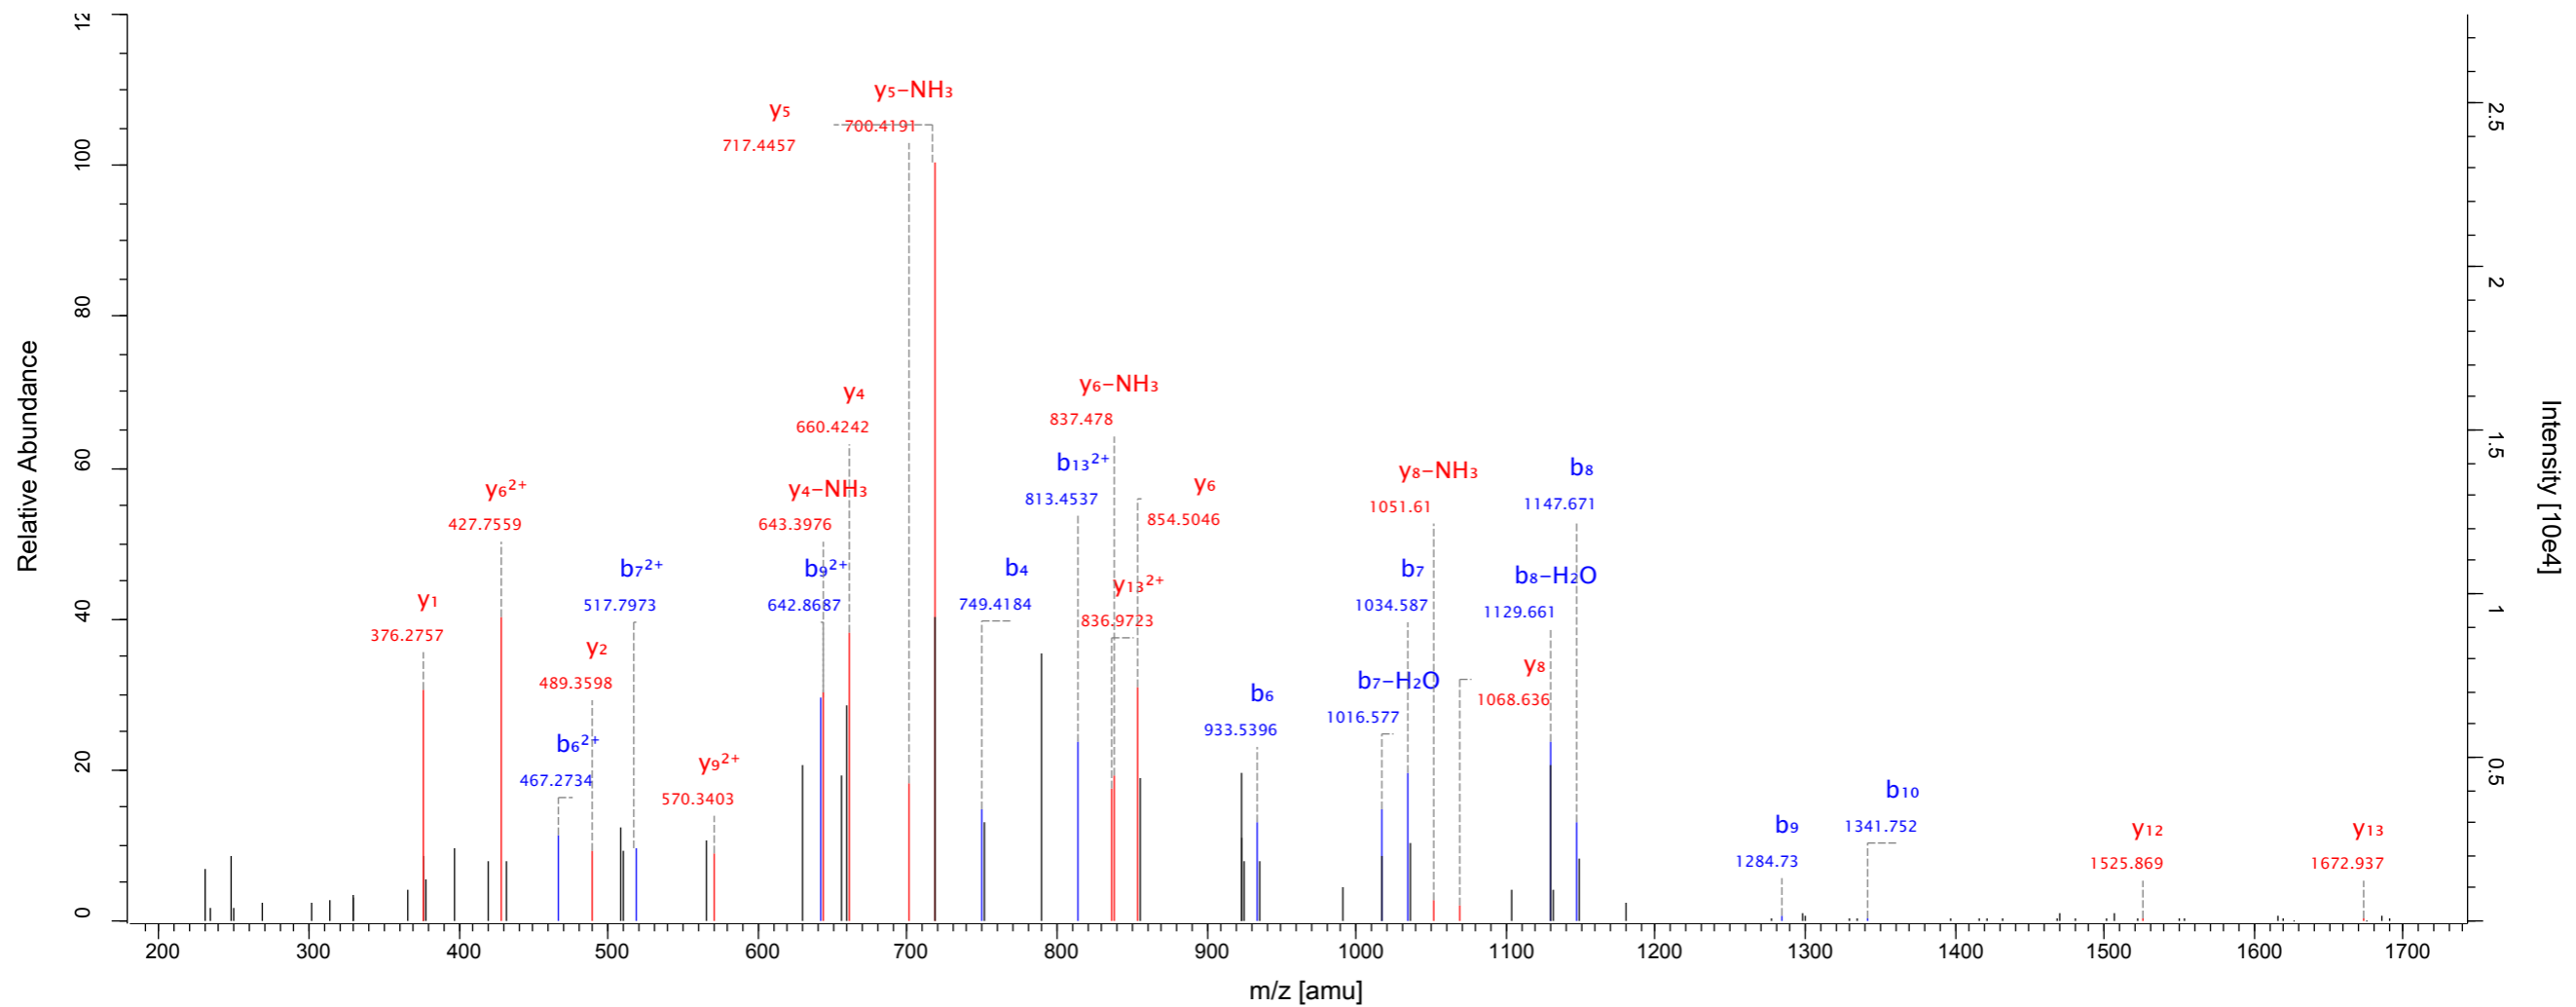

Source: mousePGCfemale-TMT6plex-group2-240ug-205min-25-26  
Scannumber: 25797  
Protein: Islr; Q6GU68  
Peptide Score: 173.44  
Method: ITMS; CID; 1

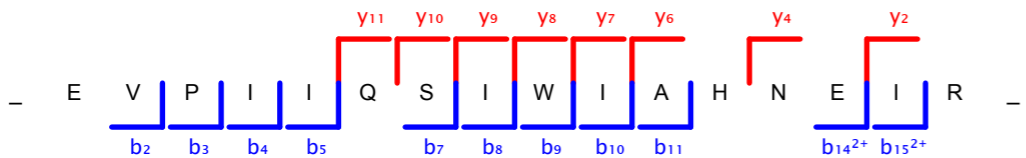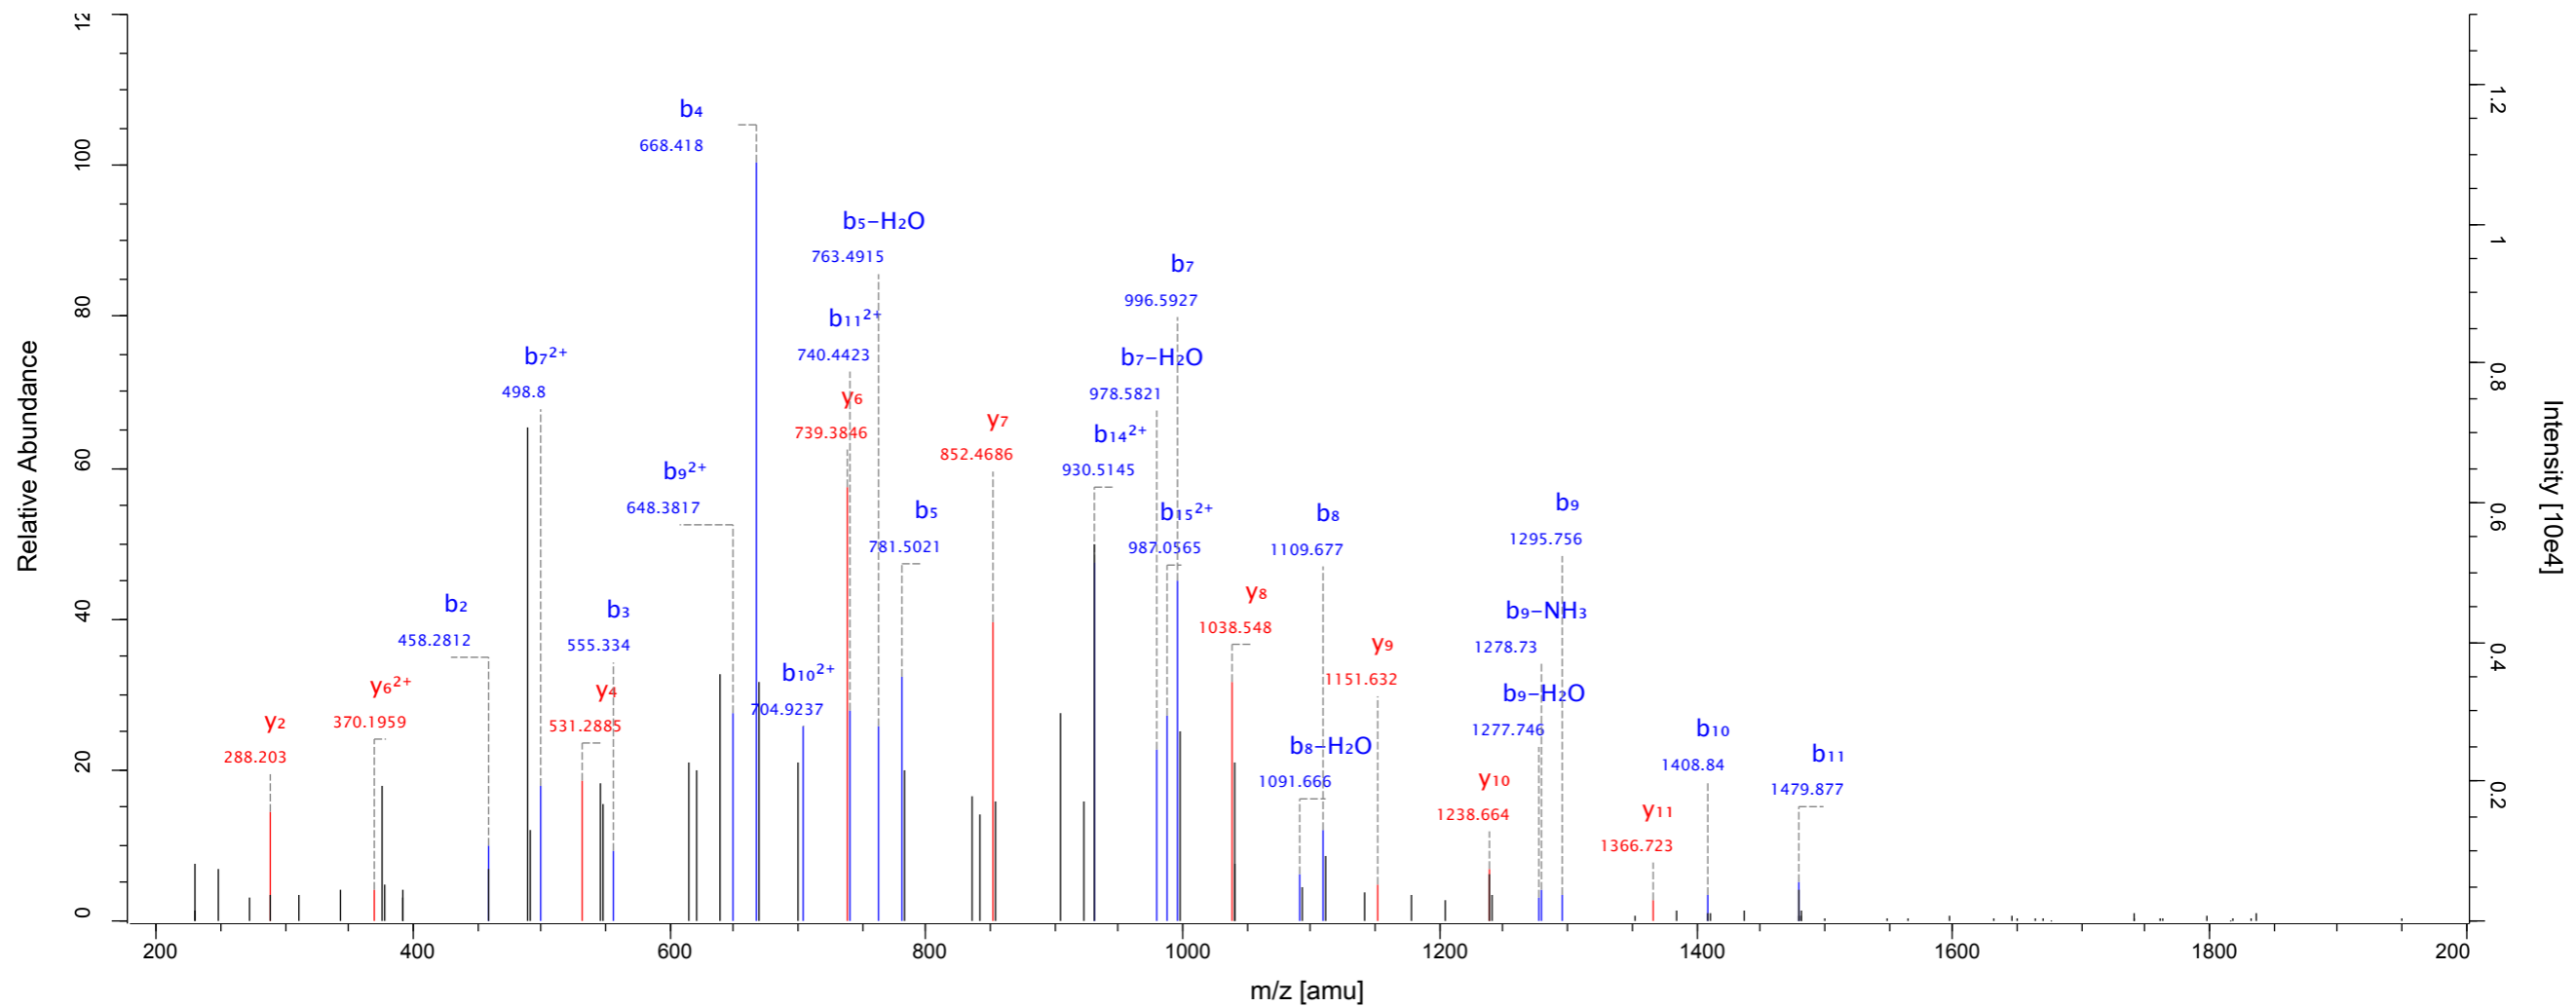



Source: mousePGCfemale-TMT6plex-group2-240ug-205min-25-26  
 Scannumber: 26490  
 Protein: Tmco1; Tmco1; Q3V4A0; Q921L3  
 Peptide Score: 227.06  
 Method: ITMS; CID; 1

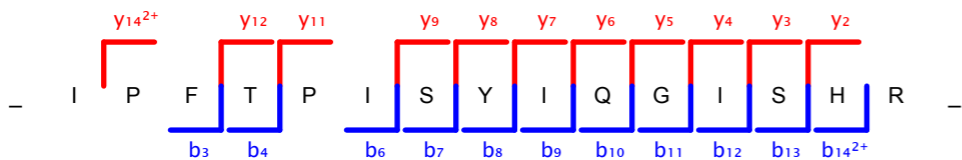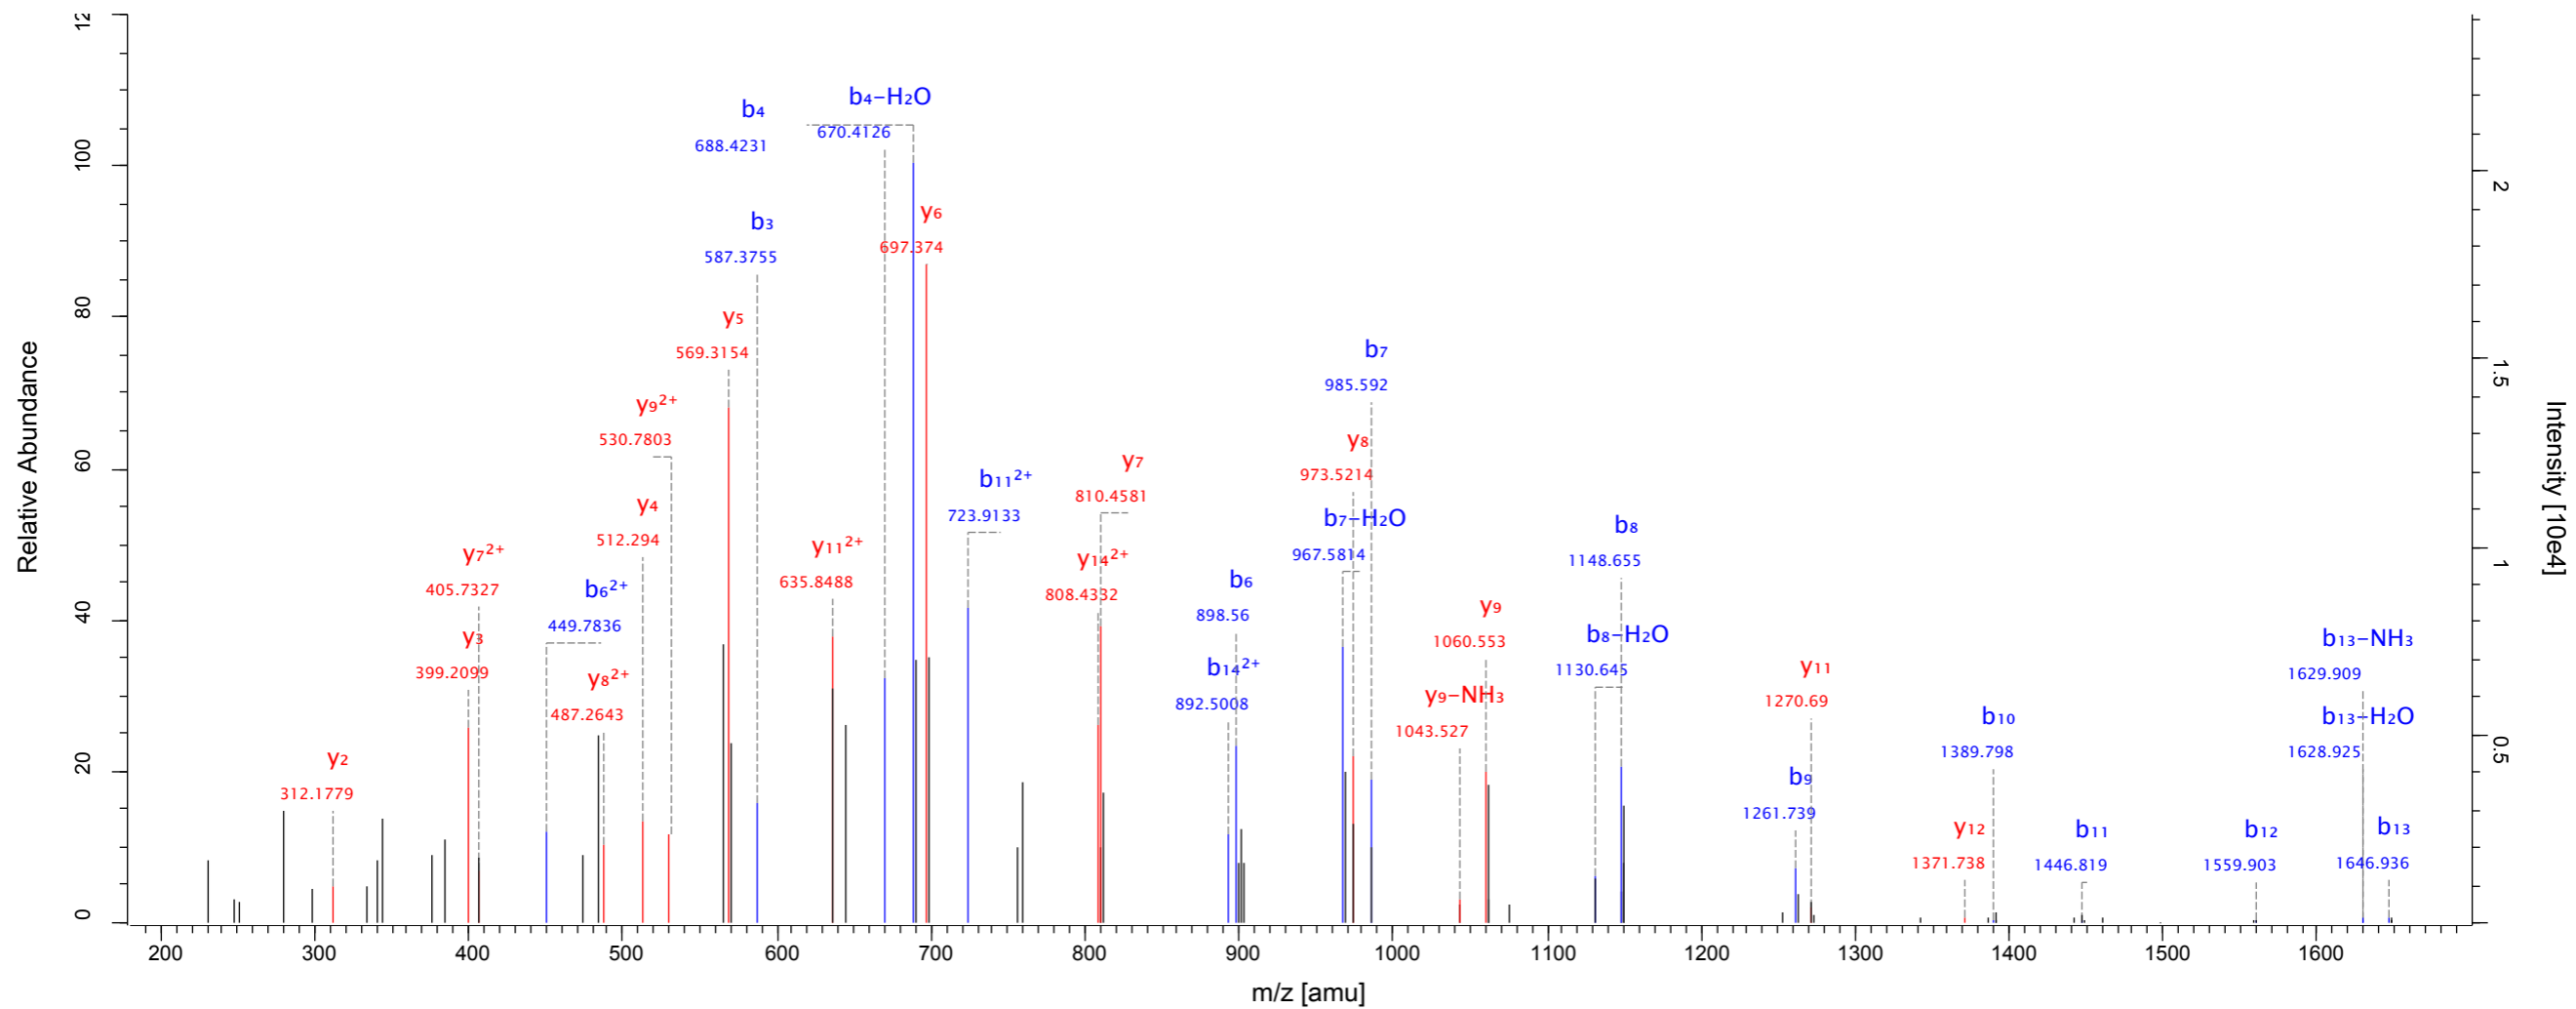

Source: mousePGCfemale-TMT6plex-group2-240ug-205min-25-26  
Scannumber: 27086  
Protein: Pss2; Ptdss2; Q9Z1X2-1; Q9Z1X2  
Peptide Score: 214.26  
Method: ITMS; CID; 1

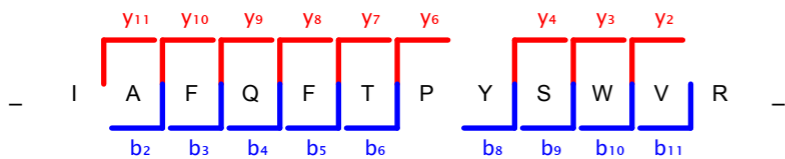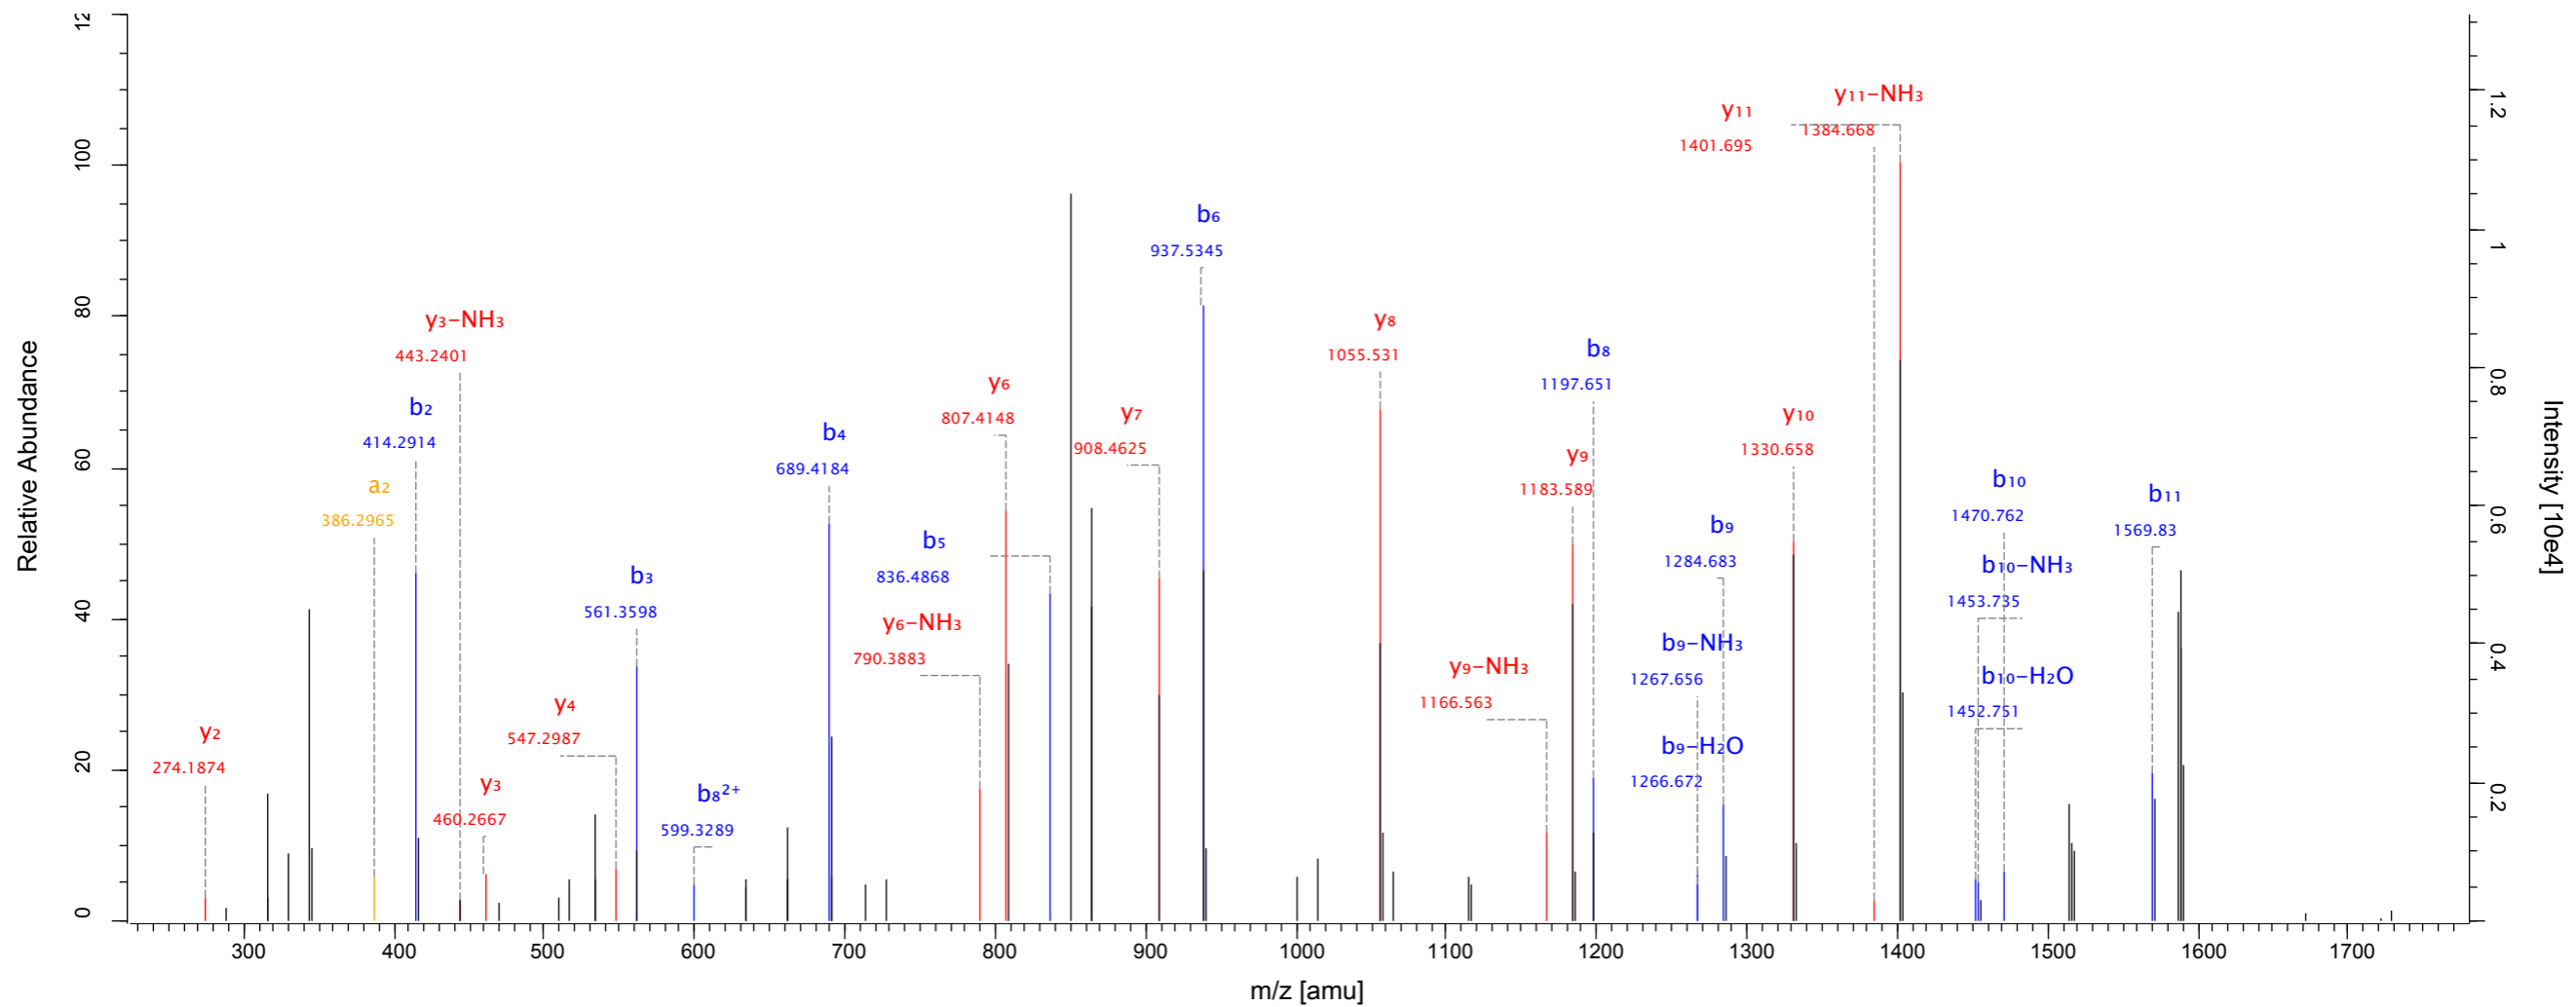

Source: mousePGCfemale-TMT6plex-group2-240ug-205min-25-26  
Scannumber: 28095  
Protein: Atp11c; RP23-316G5.1-001; Atp11c; Q9QZW0-1; Q9QZW0; B1AUG5; E9QKK8; Q9QZW0-2; Q9QZW0  
Peptide Score: 116.3  
Method: ITMS; CID; 1

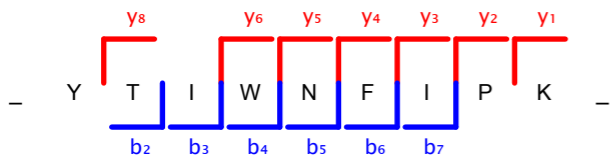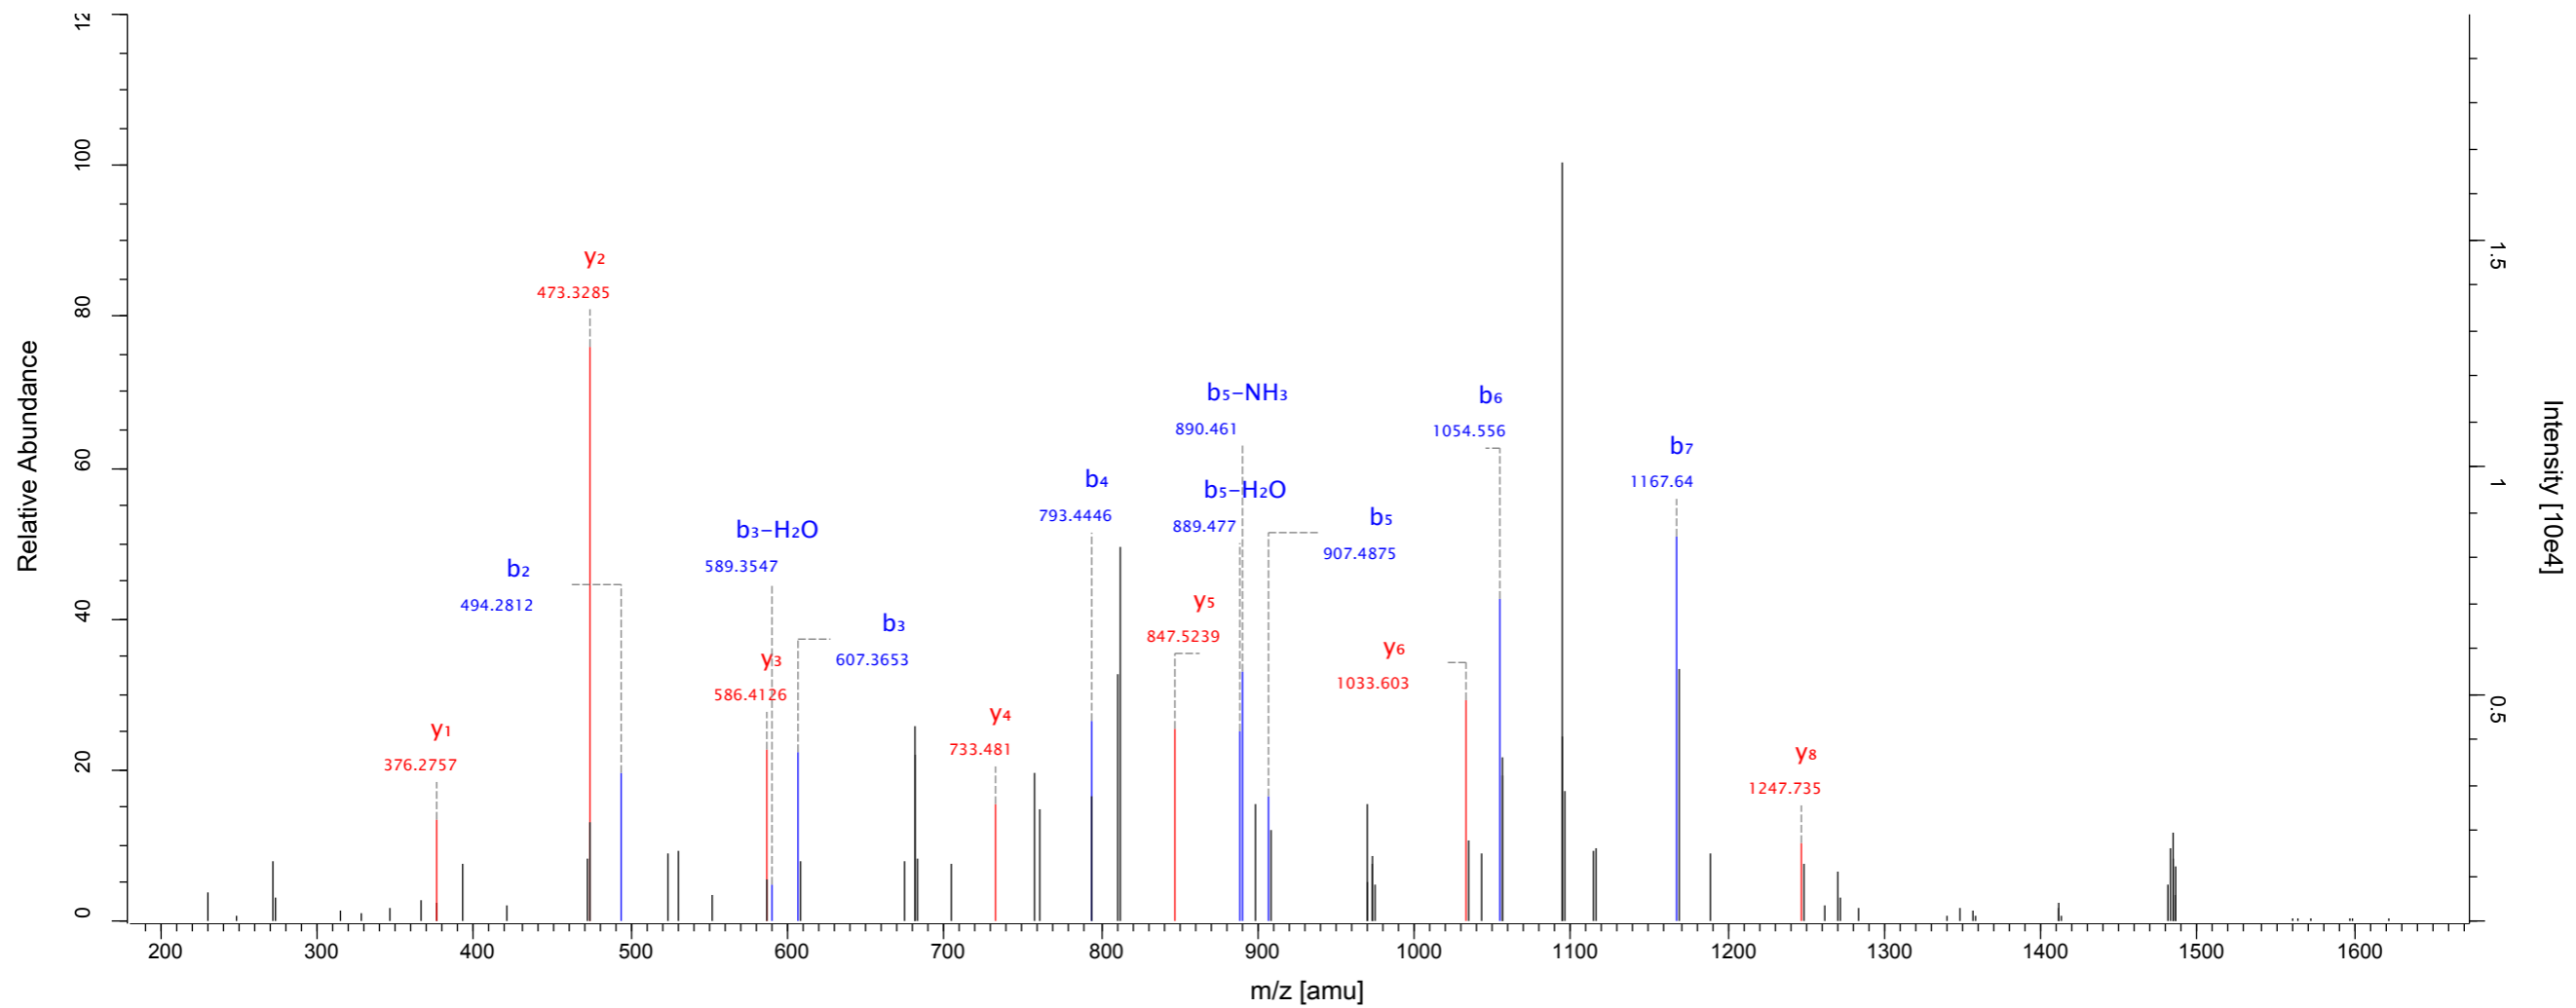

Source: mousePGCfemale-TMT6plex-group2-240ug-205min-25-26  
Scannumber: 28837  
Protein: Inpp5a; Inpp5a; Inpp5a; E9QAS7; Q8BNK3; Q3TZT4; Q7TNC9  
Peptide Score: 115.29  
Method: ITMS; CID; 1

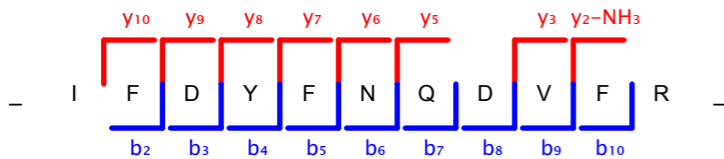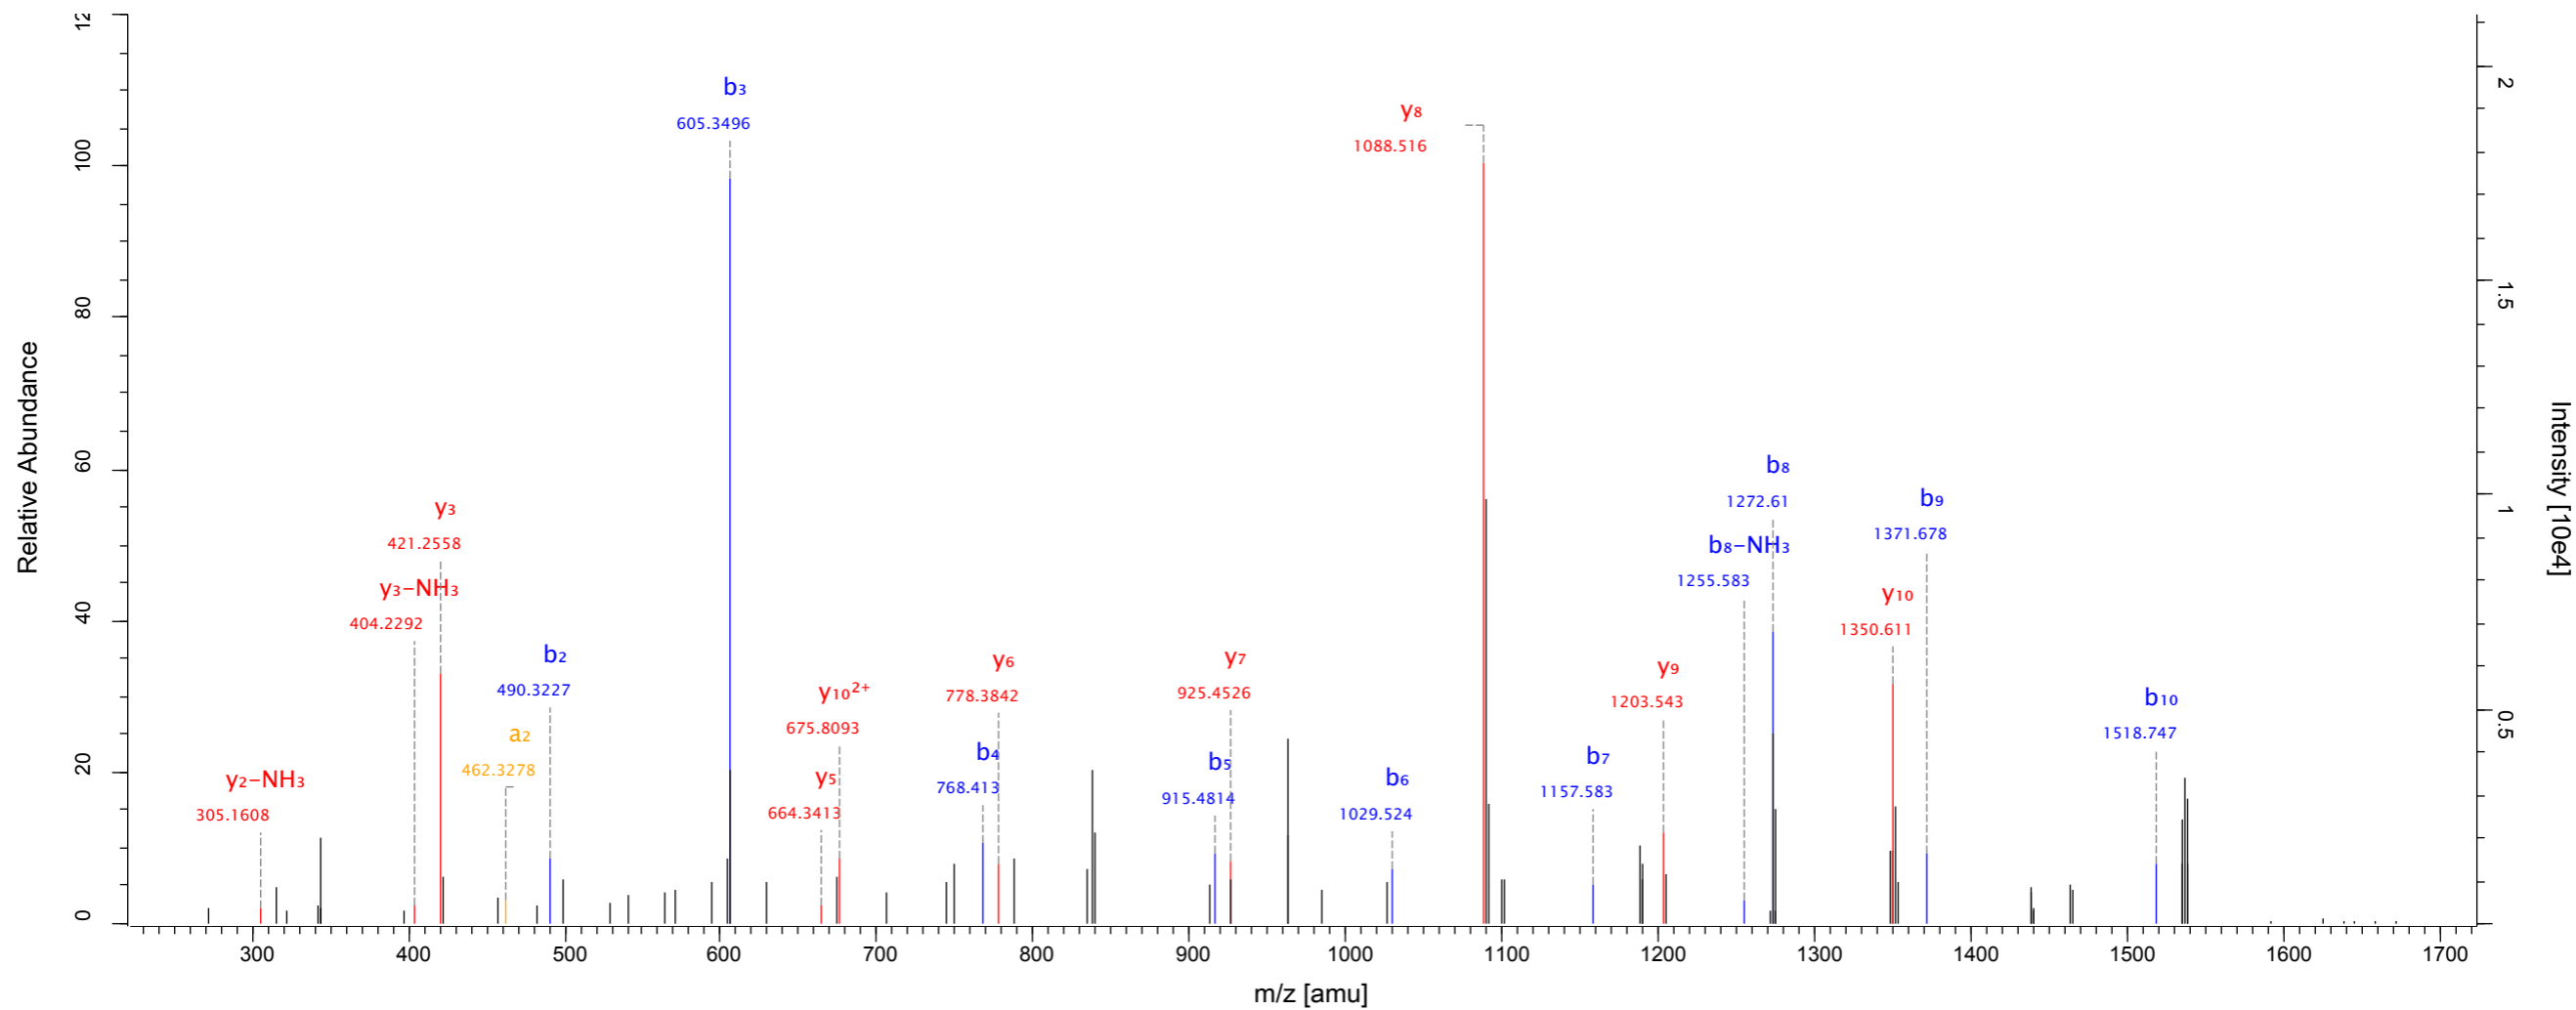

Source: mousePGCfemale-TMT6plex-group2-240ug-205min-25-26

Scannumber: 29111

Protein: mCG\_10891; RP23-153M14.3-001; Zmym1; RP23-153M14.3-003; Zmym1; Q3TJB1; Q3V1K4; Q6PG63; Q8BQI6; A2A7T8; Q05CB3; Q6P214; Q9D102; Q9D294

Peptide Score: 107.79

Method: ITMS; CID; 1

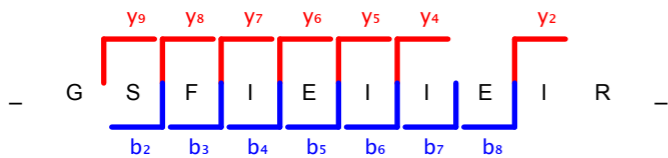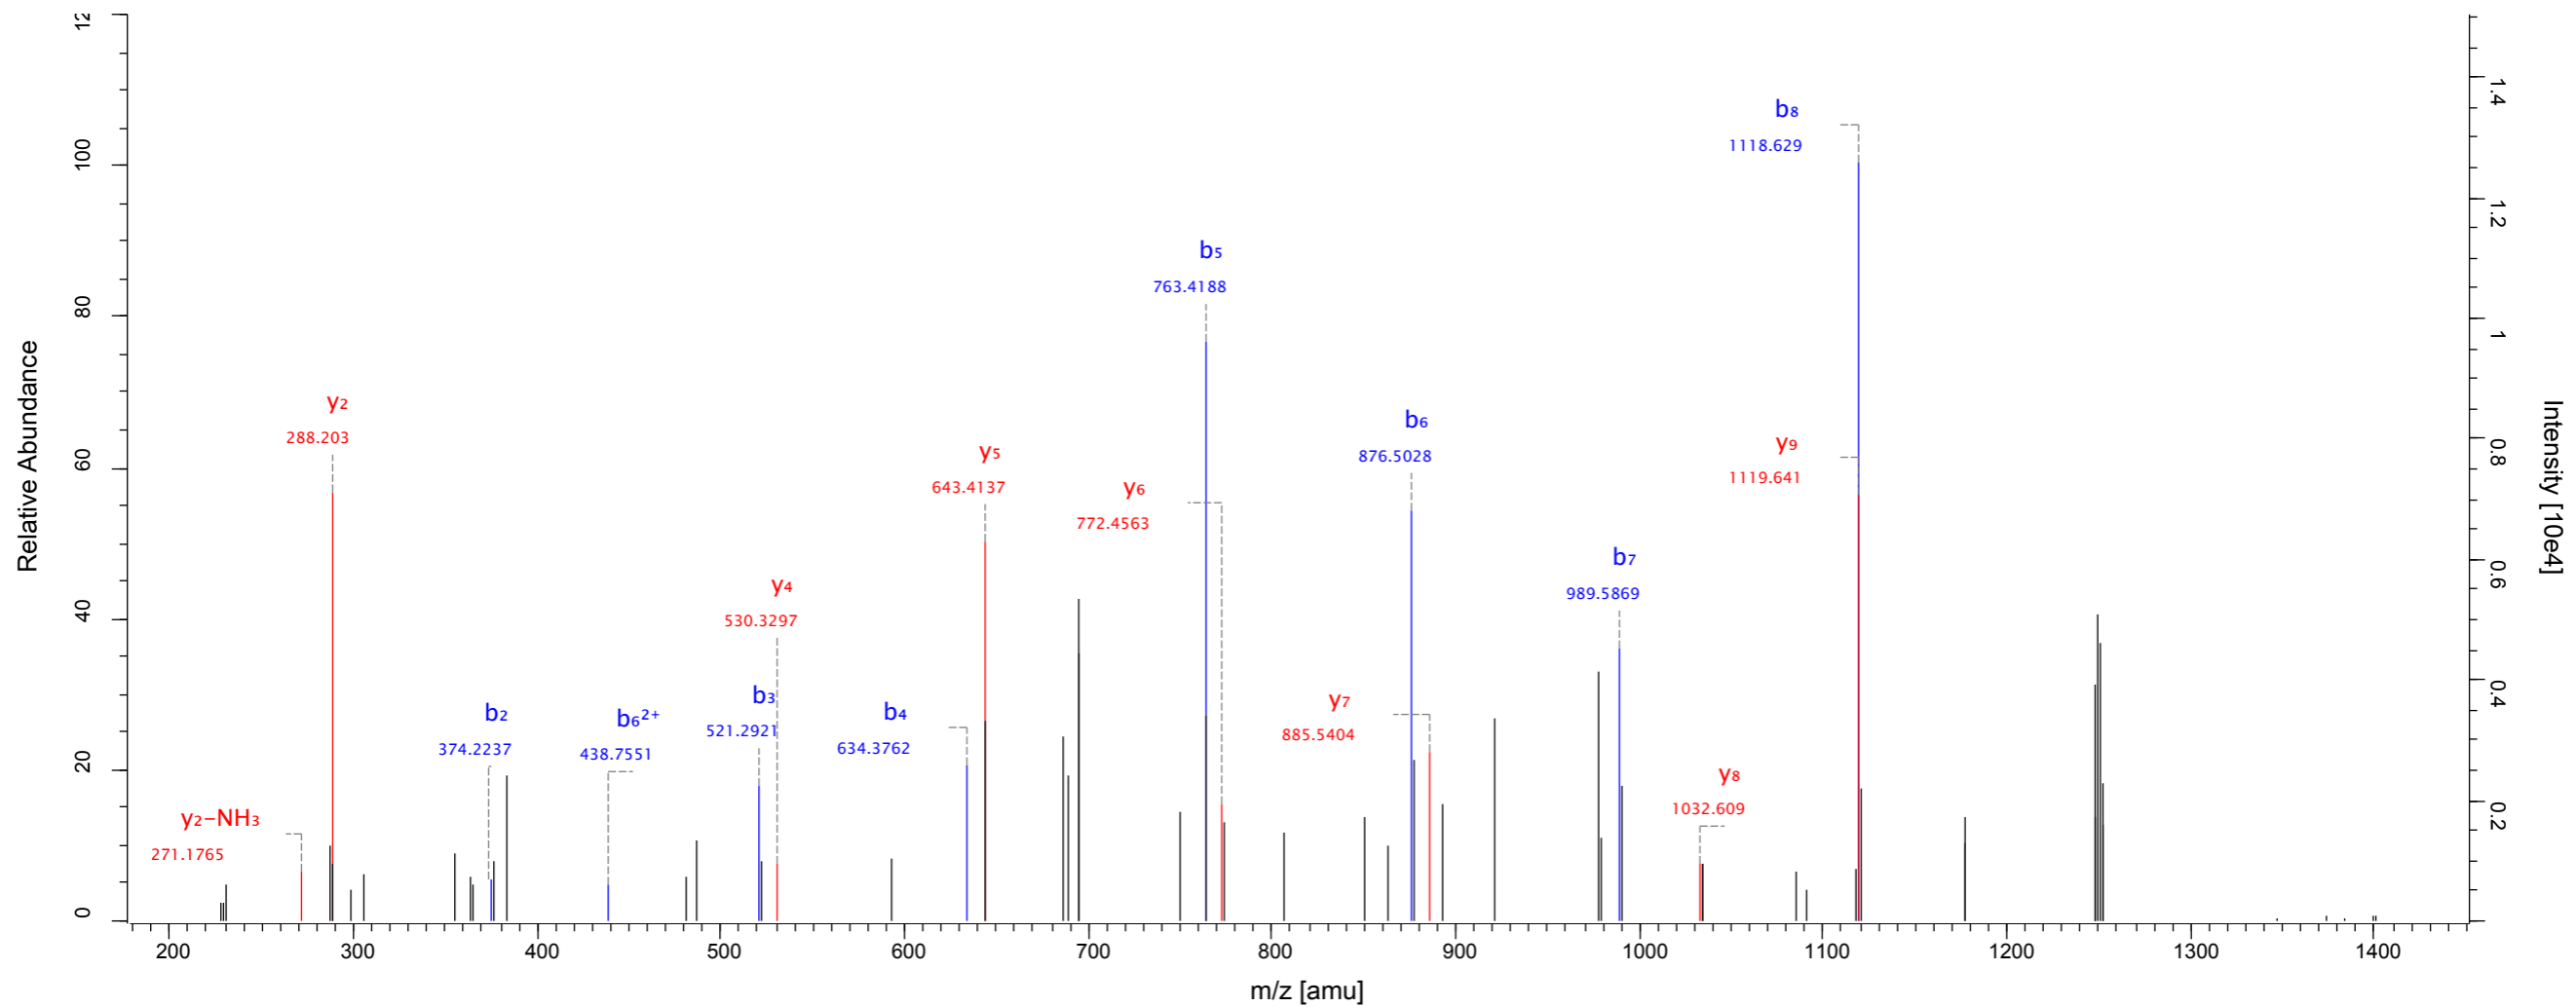

Source: mousePGCfemale-TMT6plex-group2-240ug-205min-25-26  
Scannumber: 29534  
Protein: Pkd2; Pkd2; Pkd2; E9QQA3; Q8BPR6; O35245; C0KJK2; E9Q4F6; Q9ES37  
Peptide Score: 147.72  
Method: ITMS; CID; 1

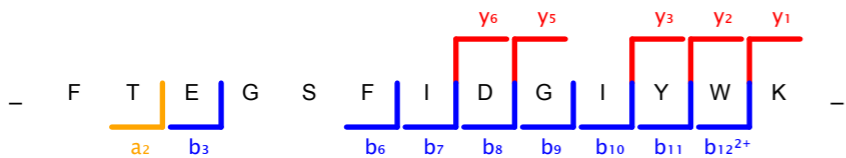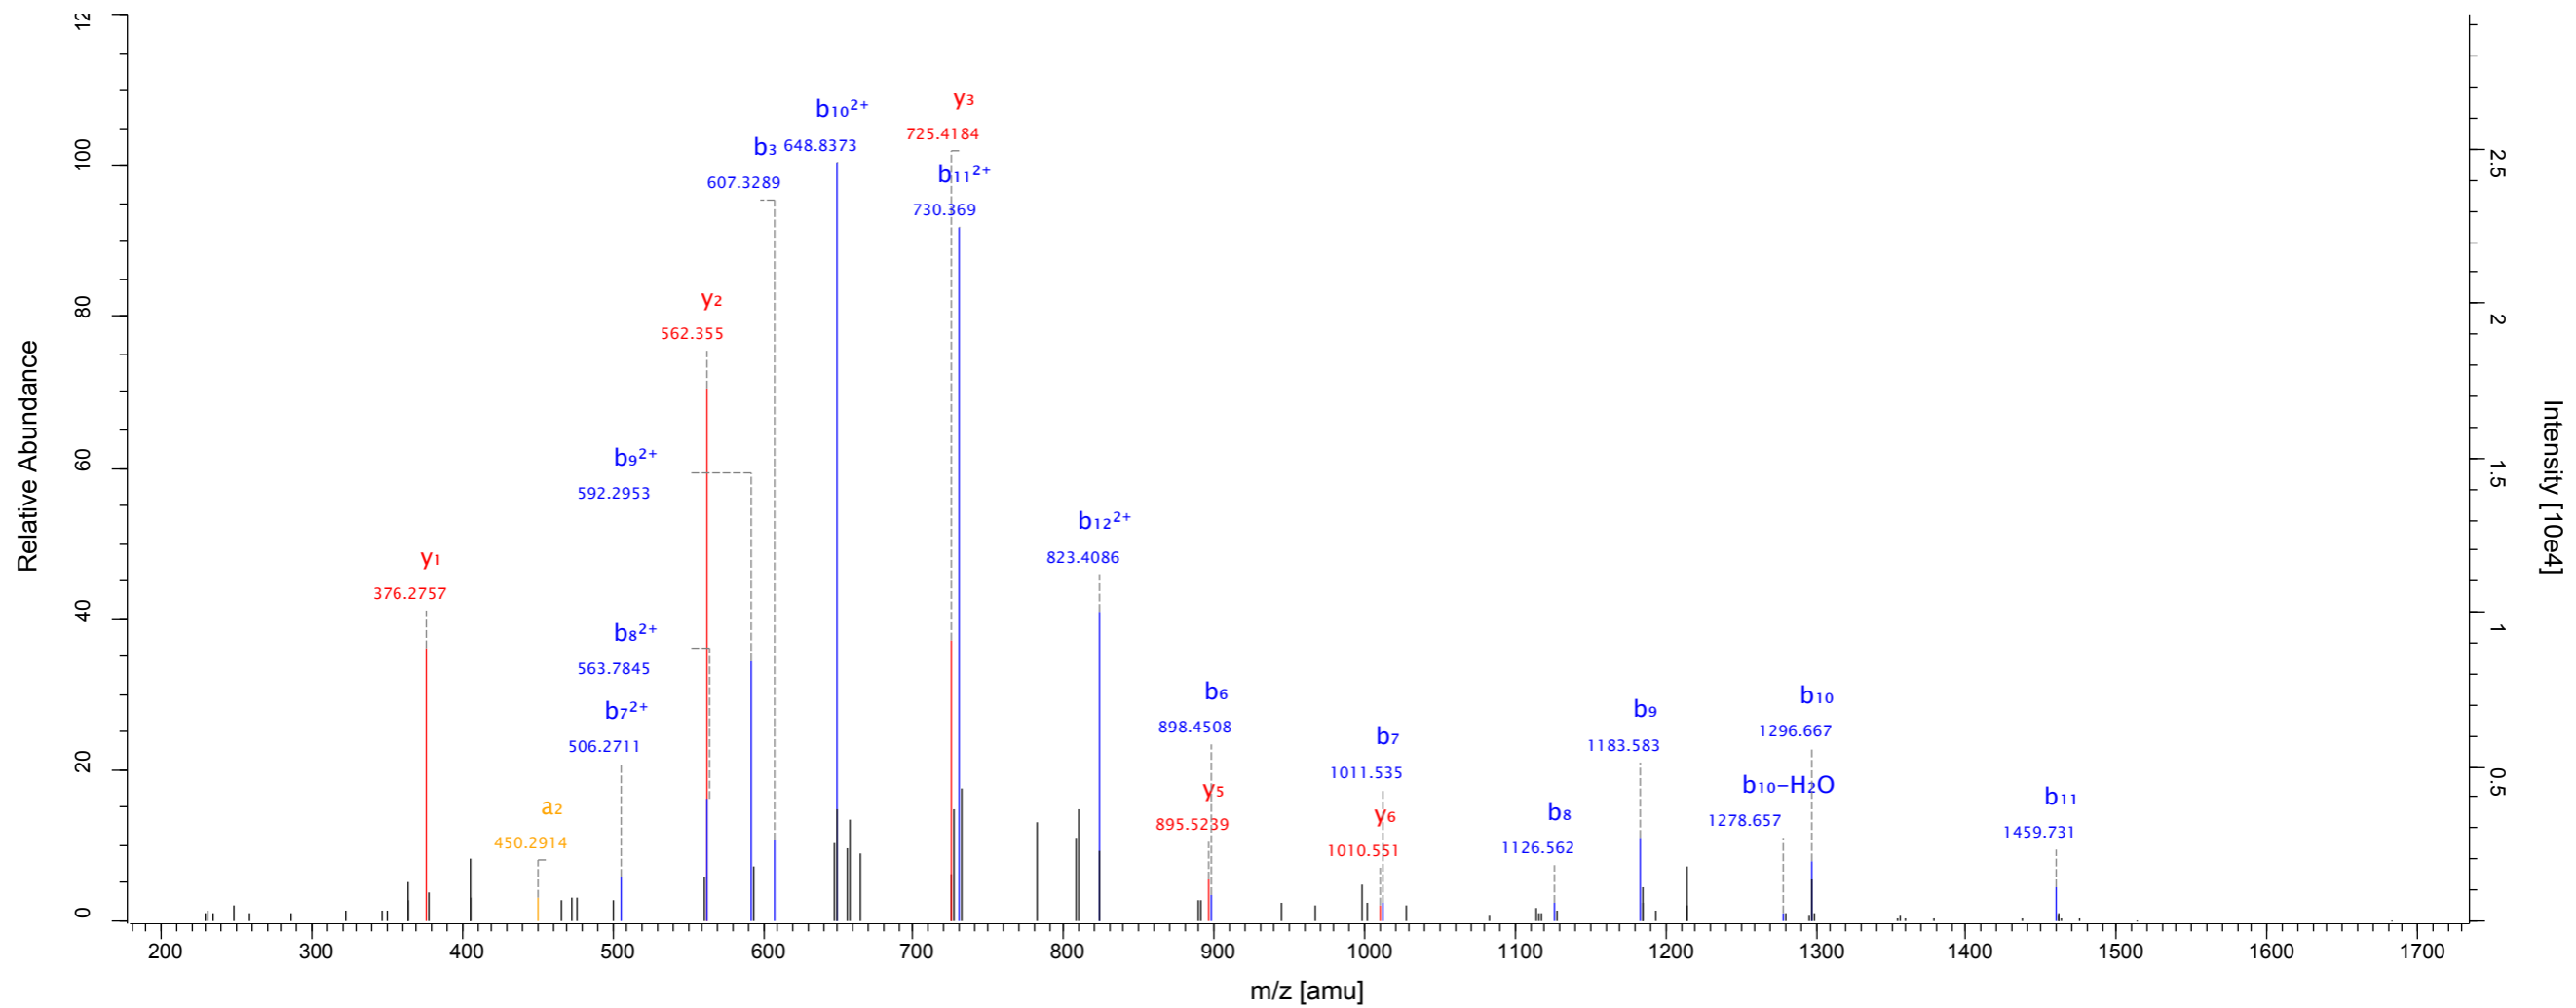

Source: mousePGCfemale-TMT6plex-group2-240ug-205min-25-26  
Scannumber: 29549  
Protein: Stag3; B2RSV0; Q3TYZ1; Q3V170  
Peptide Score: 176.51  
Method: ITMS; CID; 1

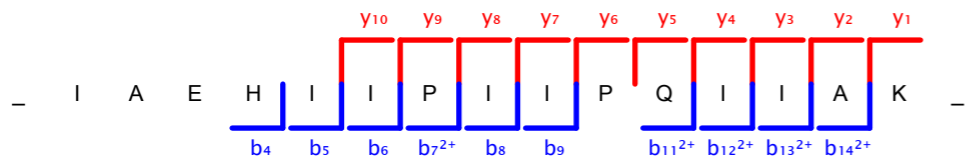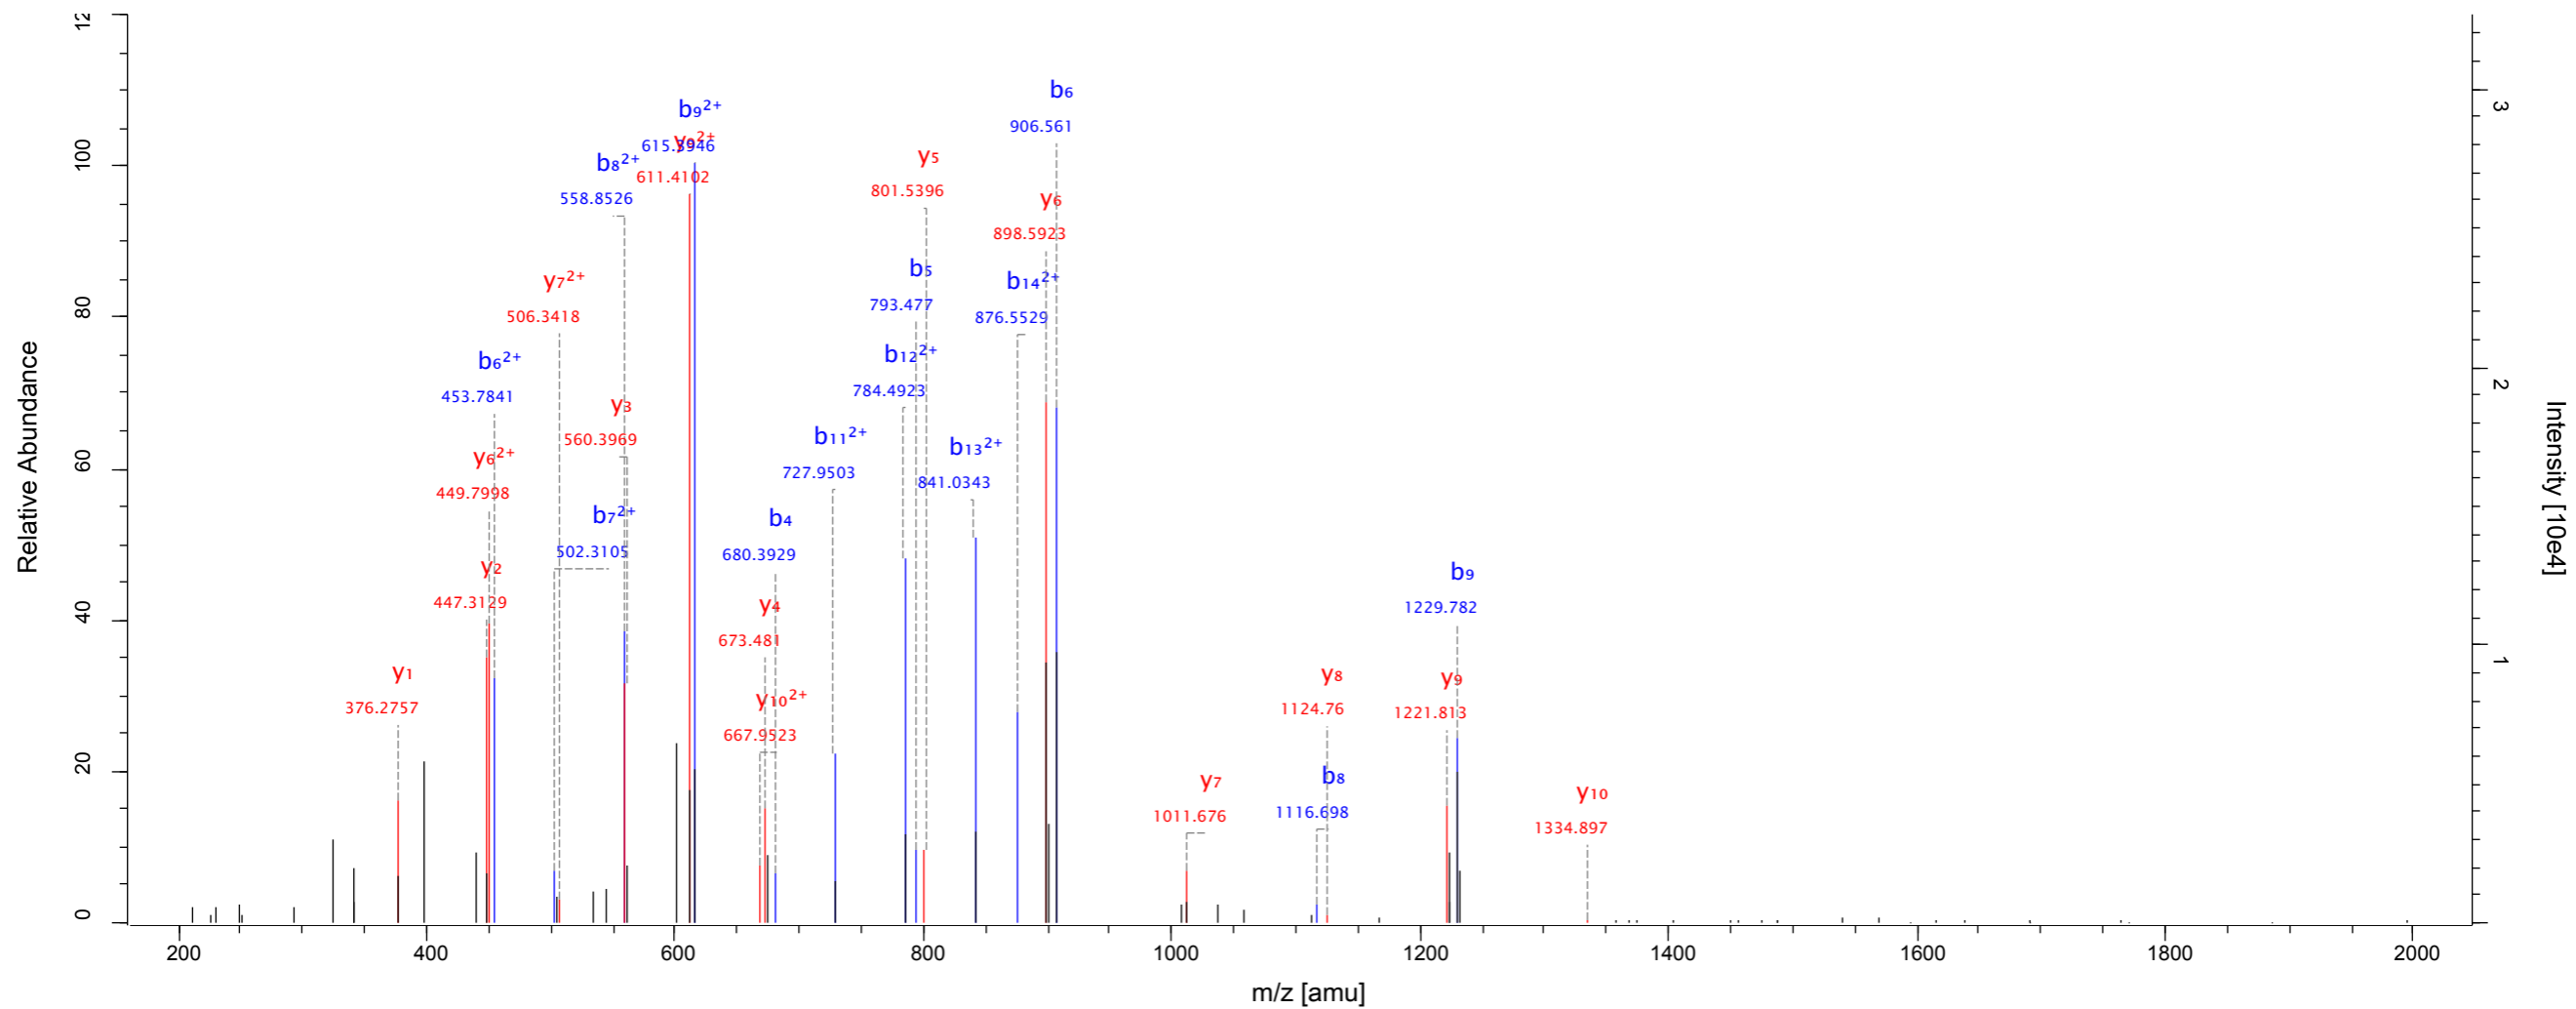

Source: mousePGCfemale-TMT6plex-group2-240ug-205min-27-28  
Scannumber: 25849  
Protein: Clptm1l; Q8BXA5  
Peptide Score: 222.79  
Method: ITMS; CID; 1

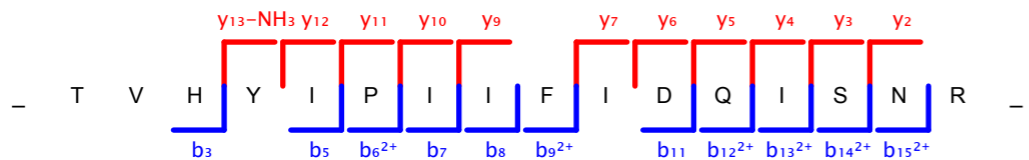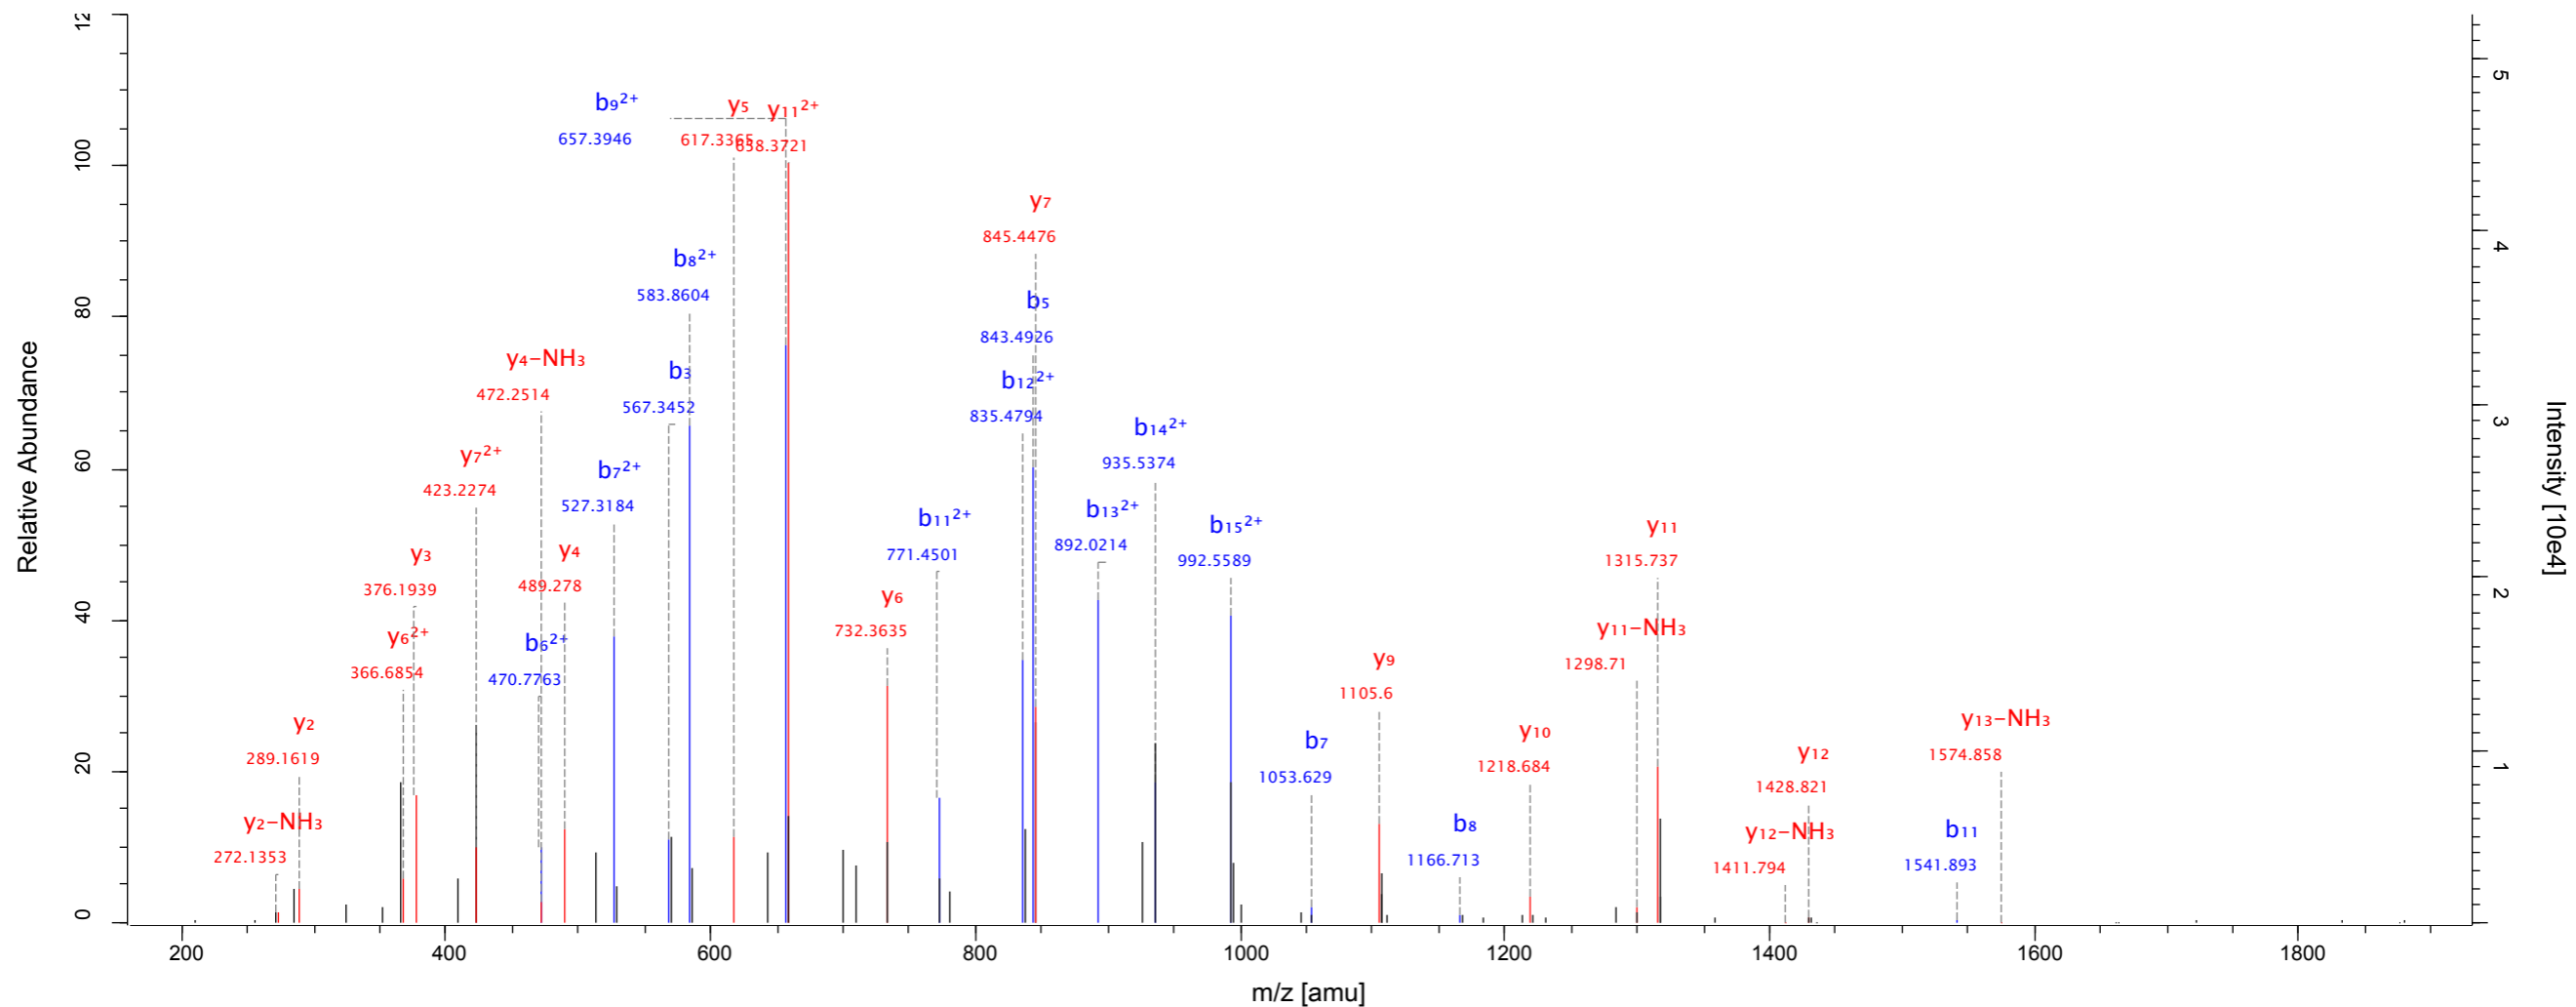



Source: mousePGCfemale-TMT6plex-group2-240ug-205min-27-28  
Scannumber: 26596  
Protein: Adams2; mKIAA4060; mCG\_67958; RP23-432O24.1-001; Q8C9W3; Q1LZL1; Q5DTQ6; Q5NCH8  
Peptide Score: 119.01  
Method: ITMS; CID; 1

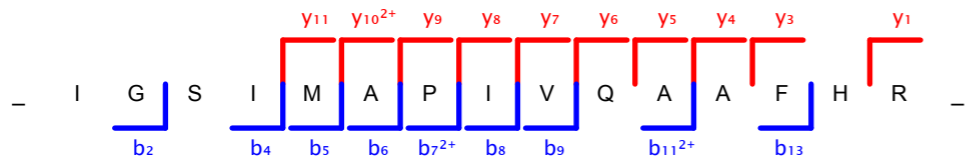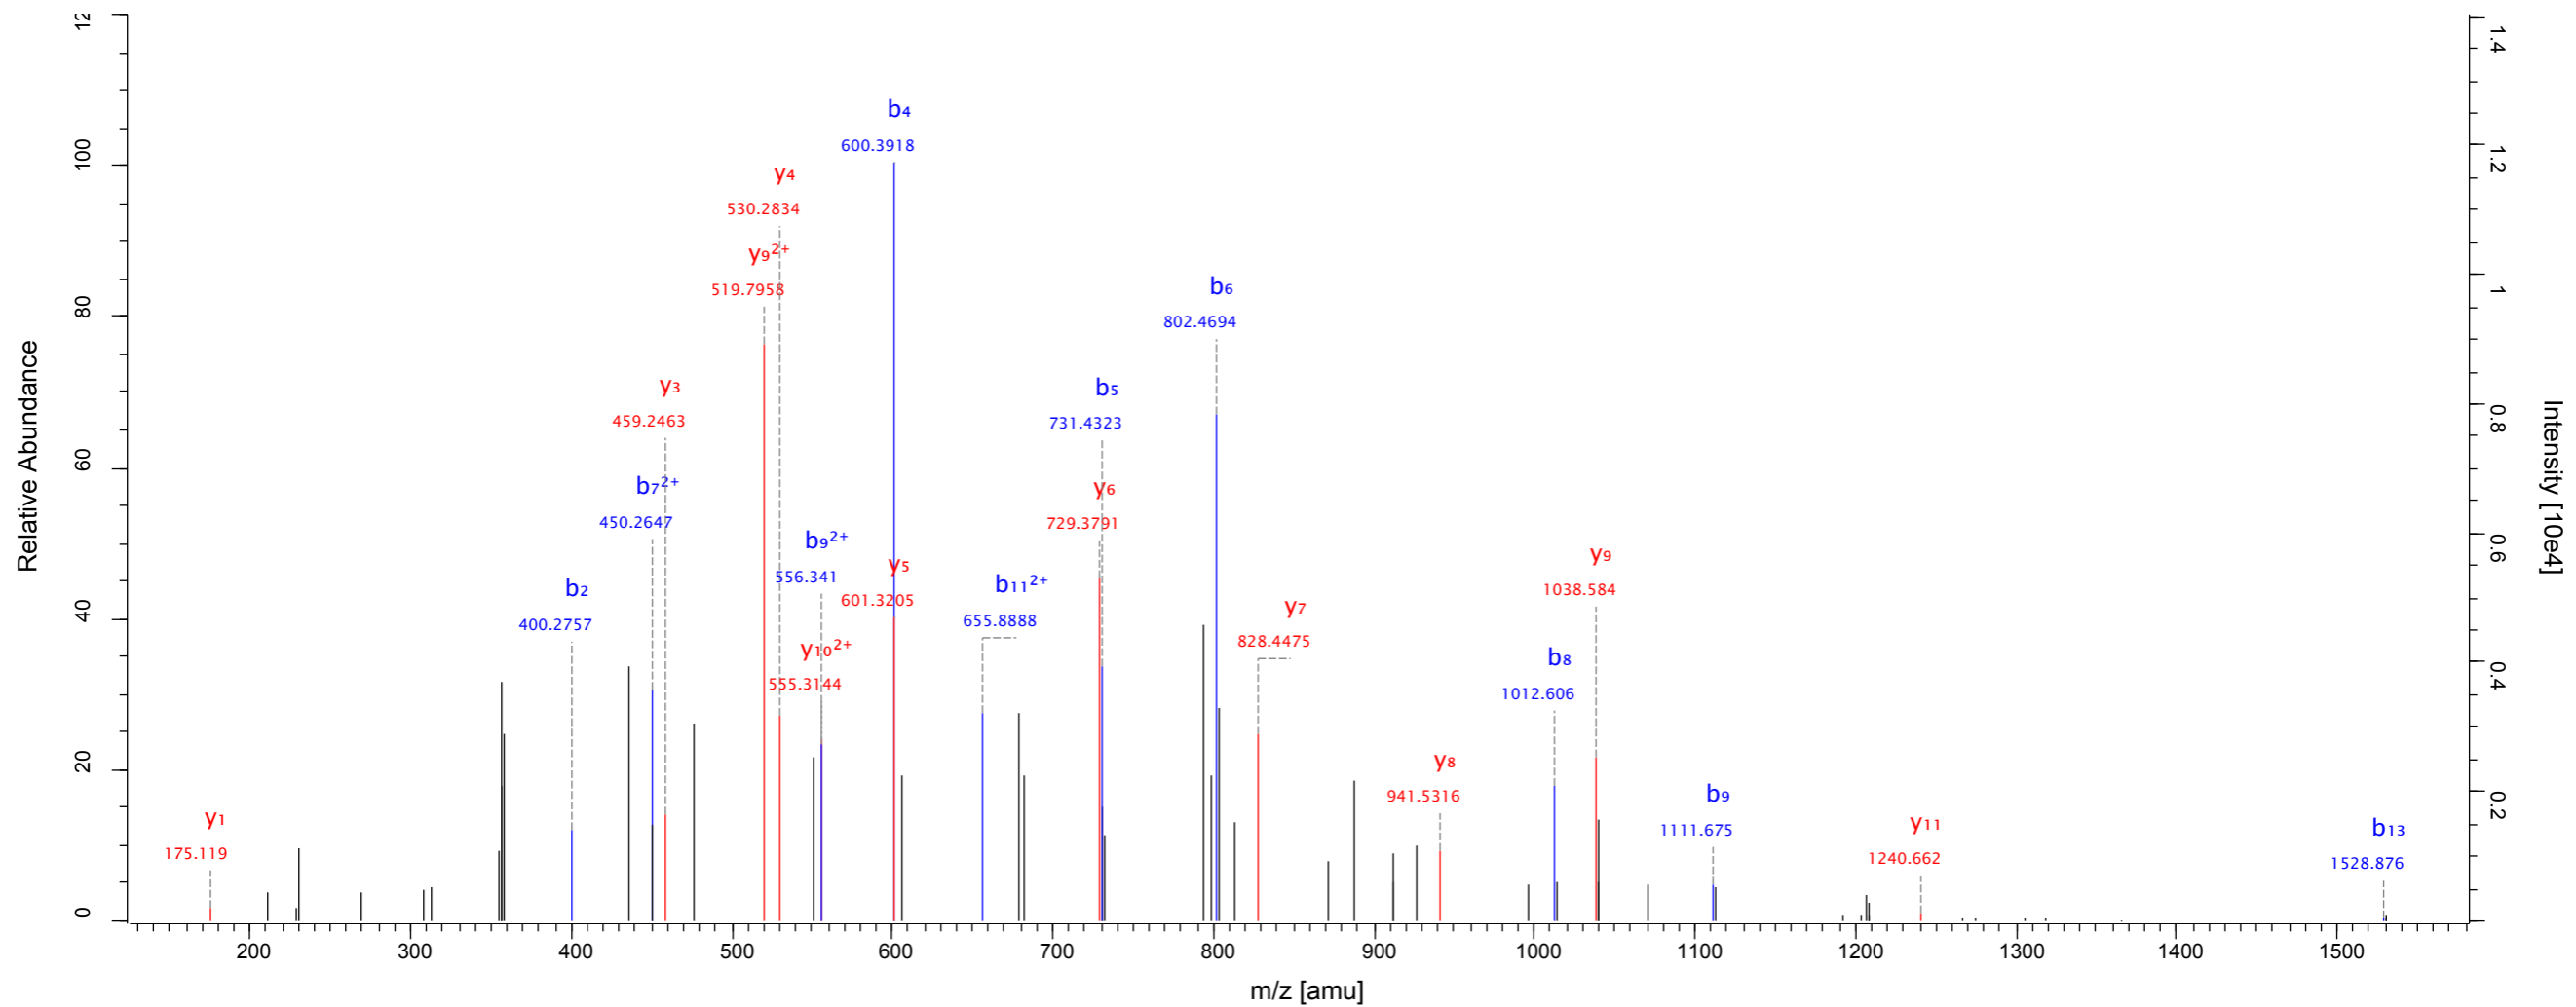

Source: mousePGCfemale-TMT6plex-group2-240ug-205min-27-28  
Scannumber: 27399  
Protein: Armcx1; mCG\_49263; RP23-316A19.1-001; Q9CX83; A2AKS2  
Peptide Score: 141.39  
Method: ITMS; CID; 1

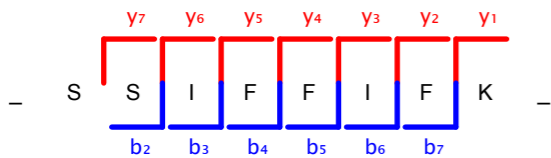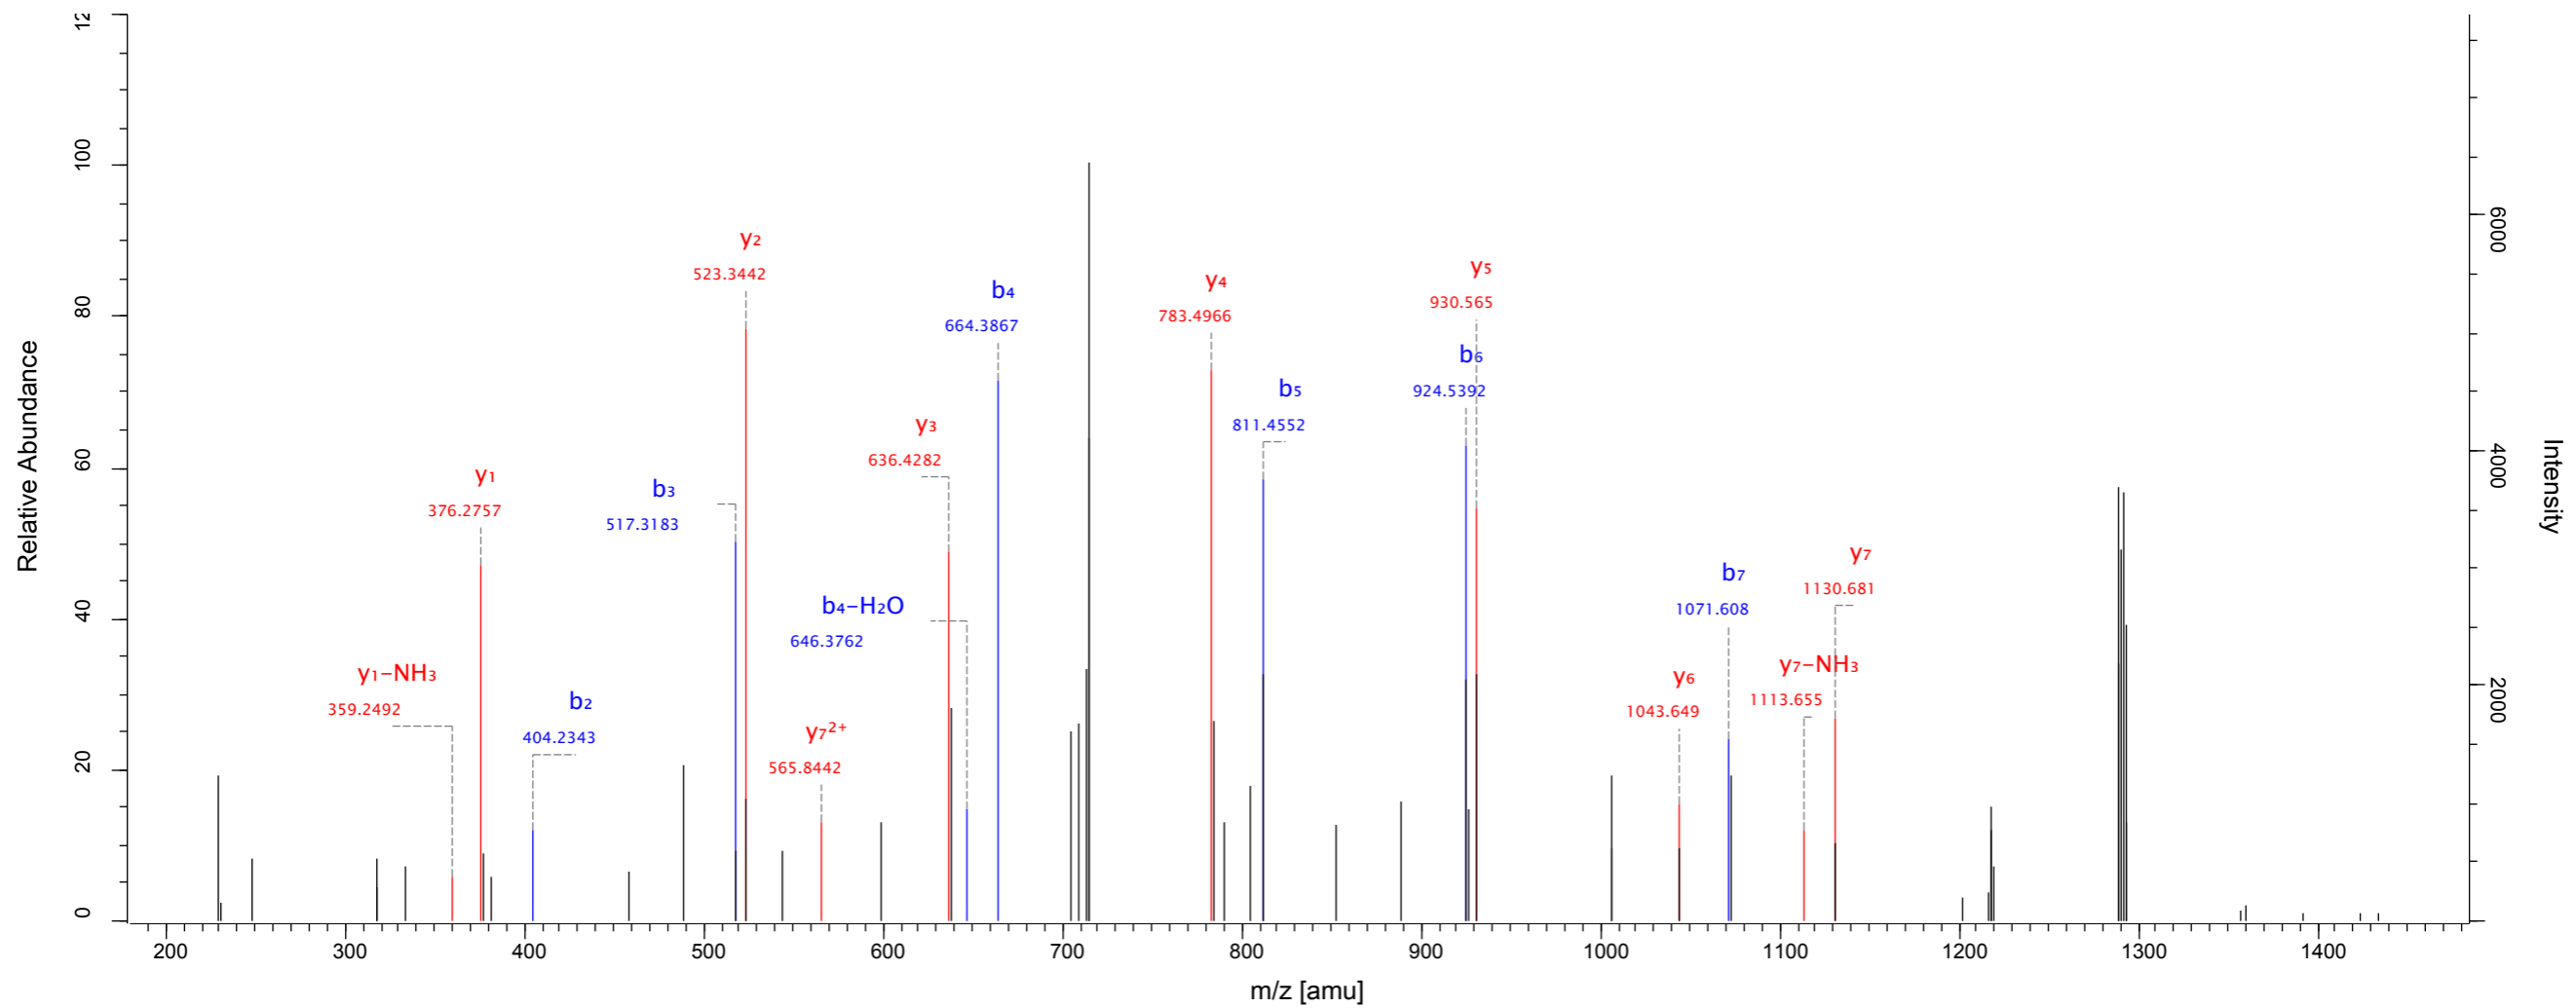

Source: mousePGCfemale-TMT6plex-group2-240ug-205min-27-28  
Scannumber: 27812  
Protein: Tmem167; Tmem167a; Tmem167; Tmem167a; D3YW38; Q9CR64-1; Q9CR64; Q9CR64-2; Q9CR64; E0CY07  
Peptide Score: 156.94  
Method: ITMS; CID; 1

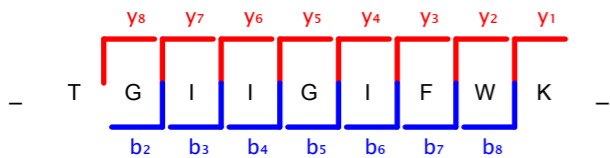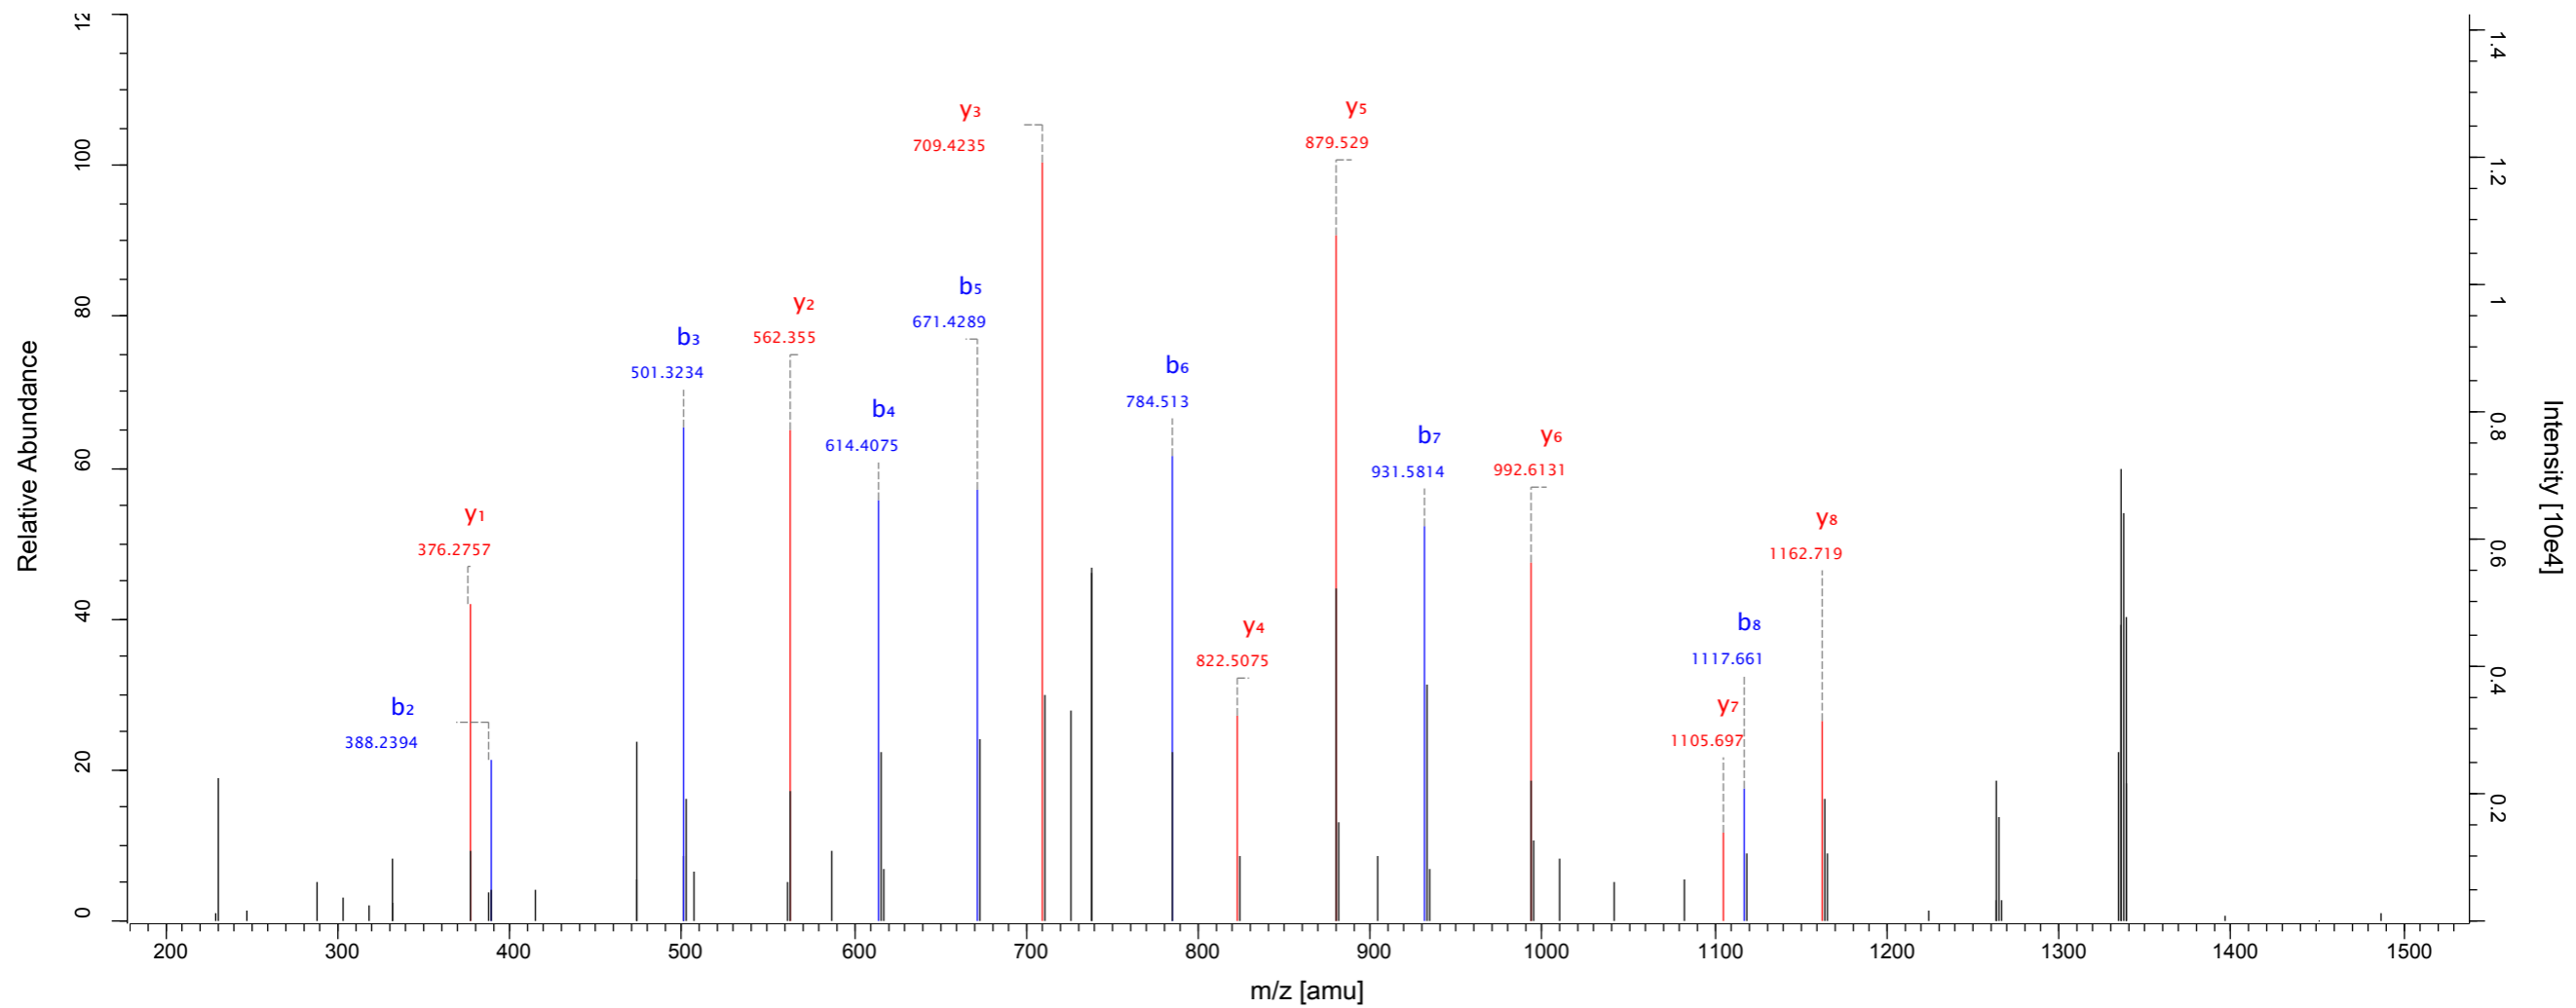

Source: mousePGCfemale-TMT6plex-group2-240ug-205min-27-28  
Scannumber: 29192  
Protein: Acrbp; Acrbp; Ing4; Q3V140-1; Q3V140; Q3V140-2; Q3V140; Q1WWJ9; Q6P8Q6  
Peptide Score: 141.88  
Method: ITMS; CID; 1

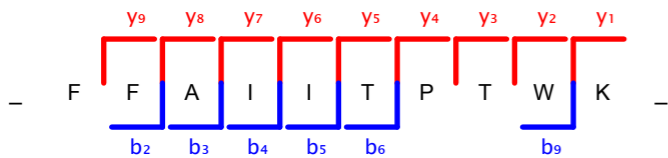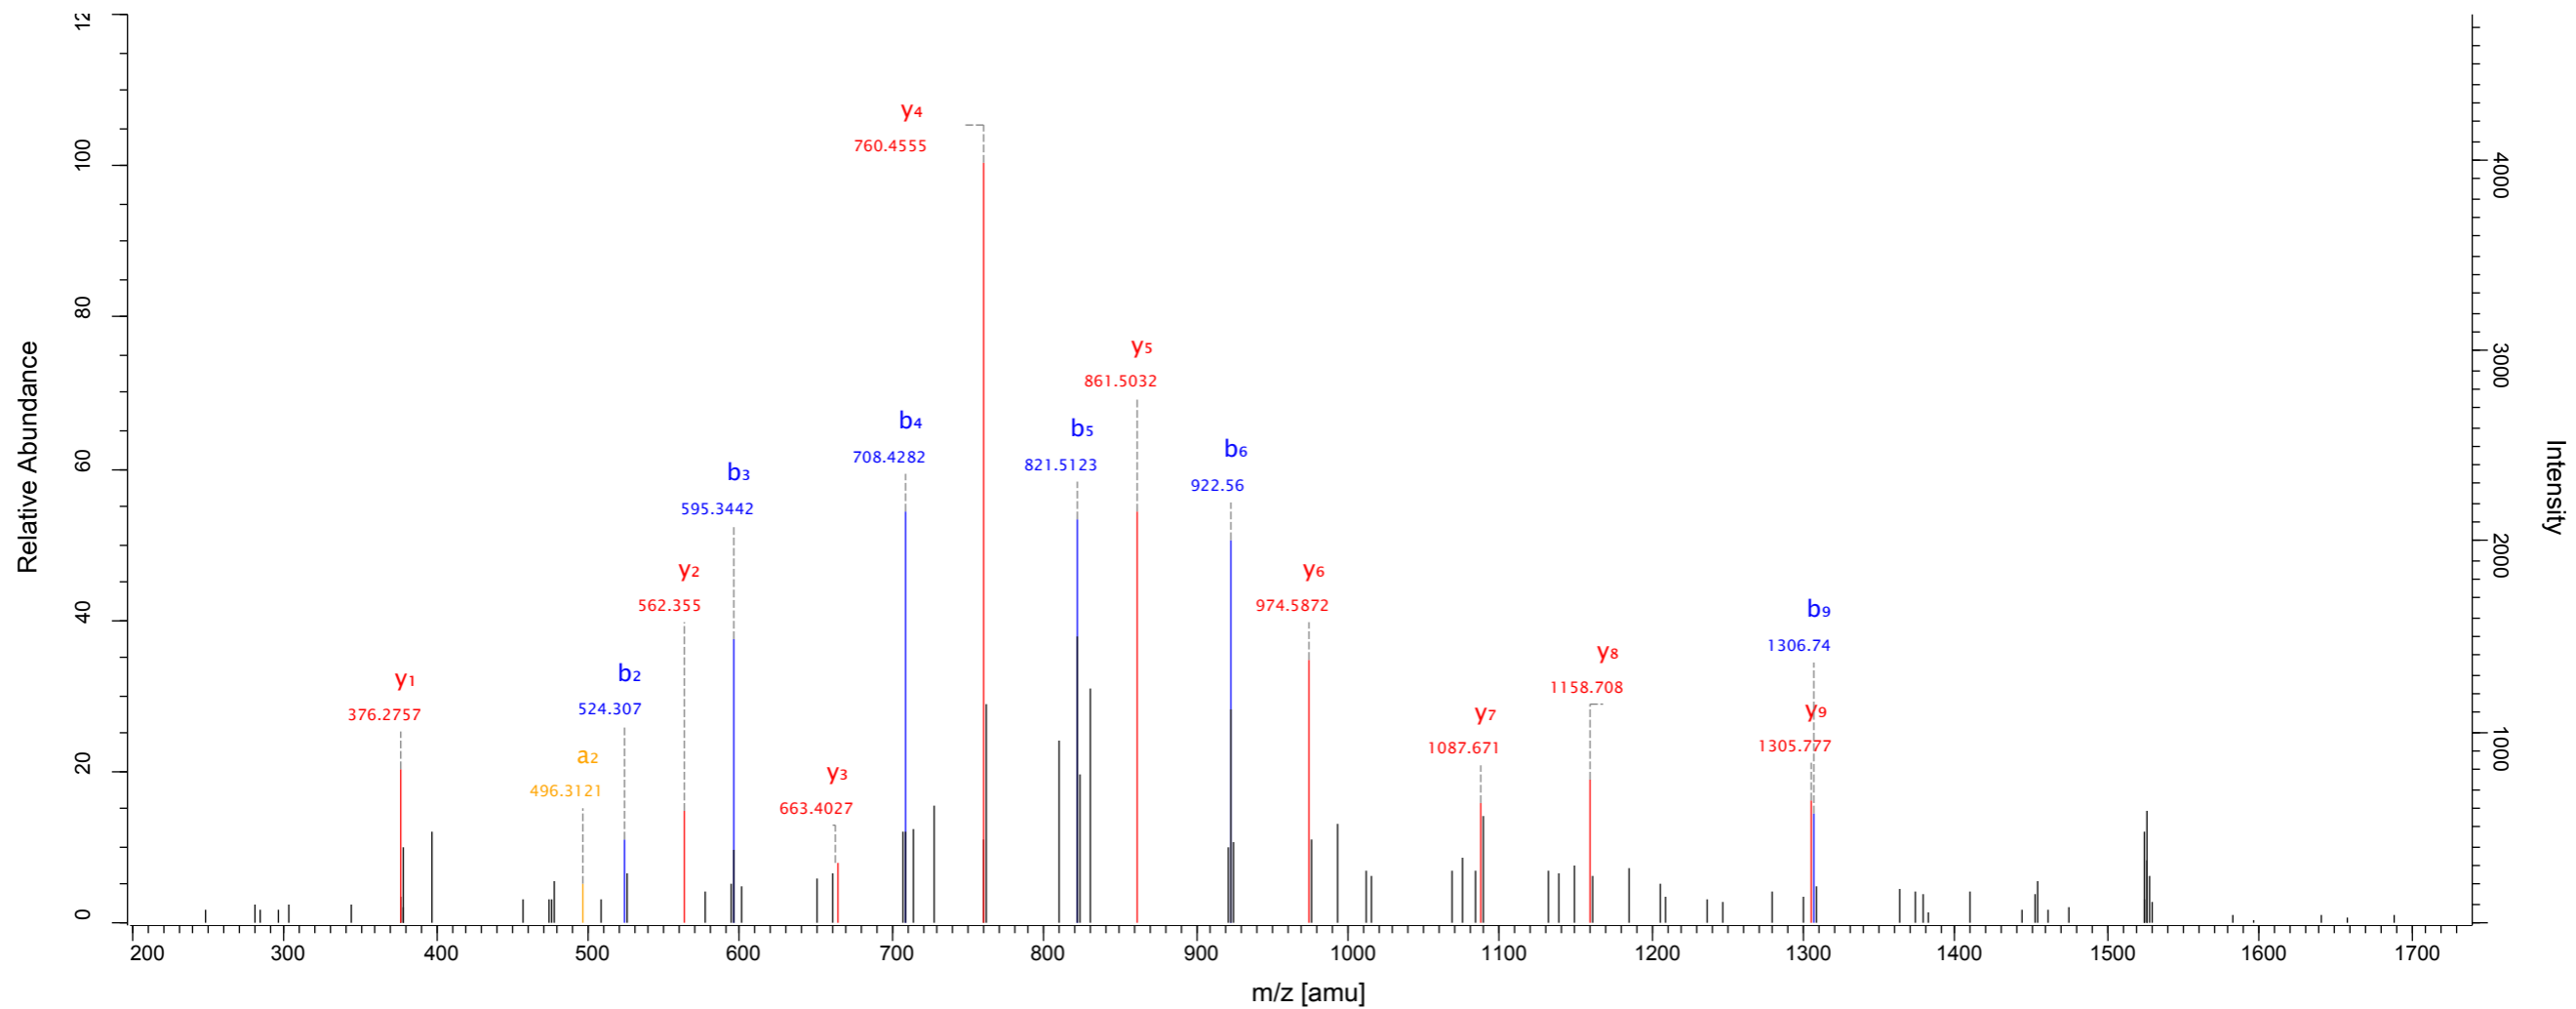

Source: mousePGCfemale-TMT6plex-group2-240ug-205min-29-30  
Scannumber: 21063  
Protein: Capn5; Ncl3; mCG\_124265; O08688; Q3TDS7; Q3TPL4; Q3U2P3; Q3UTF3  
Peptide Score: 123.72  
Method: ITMS; CID; 1

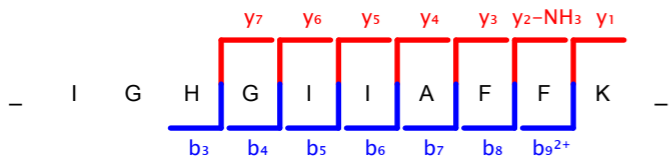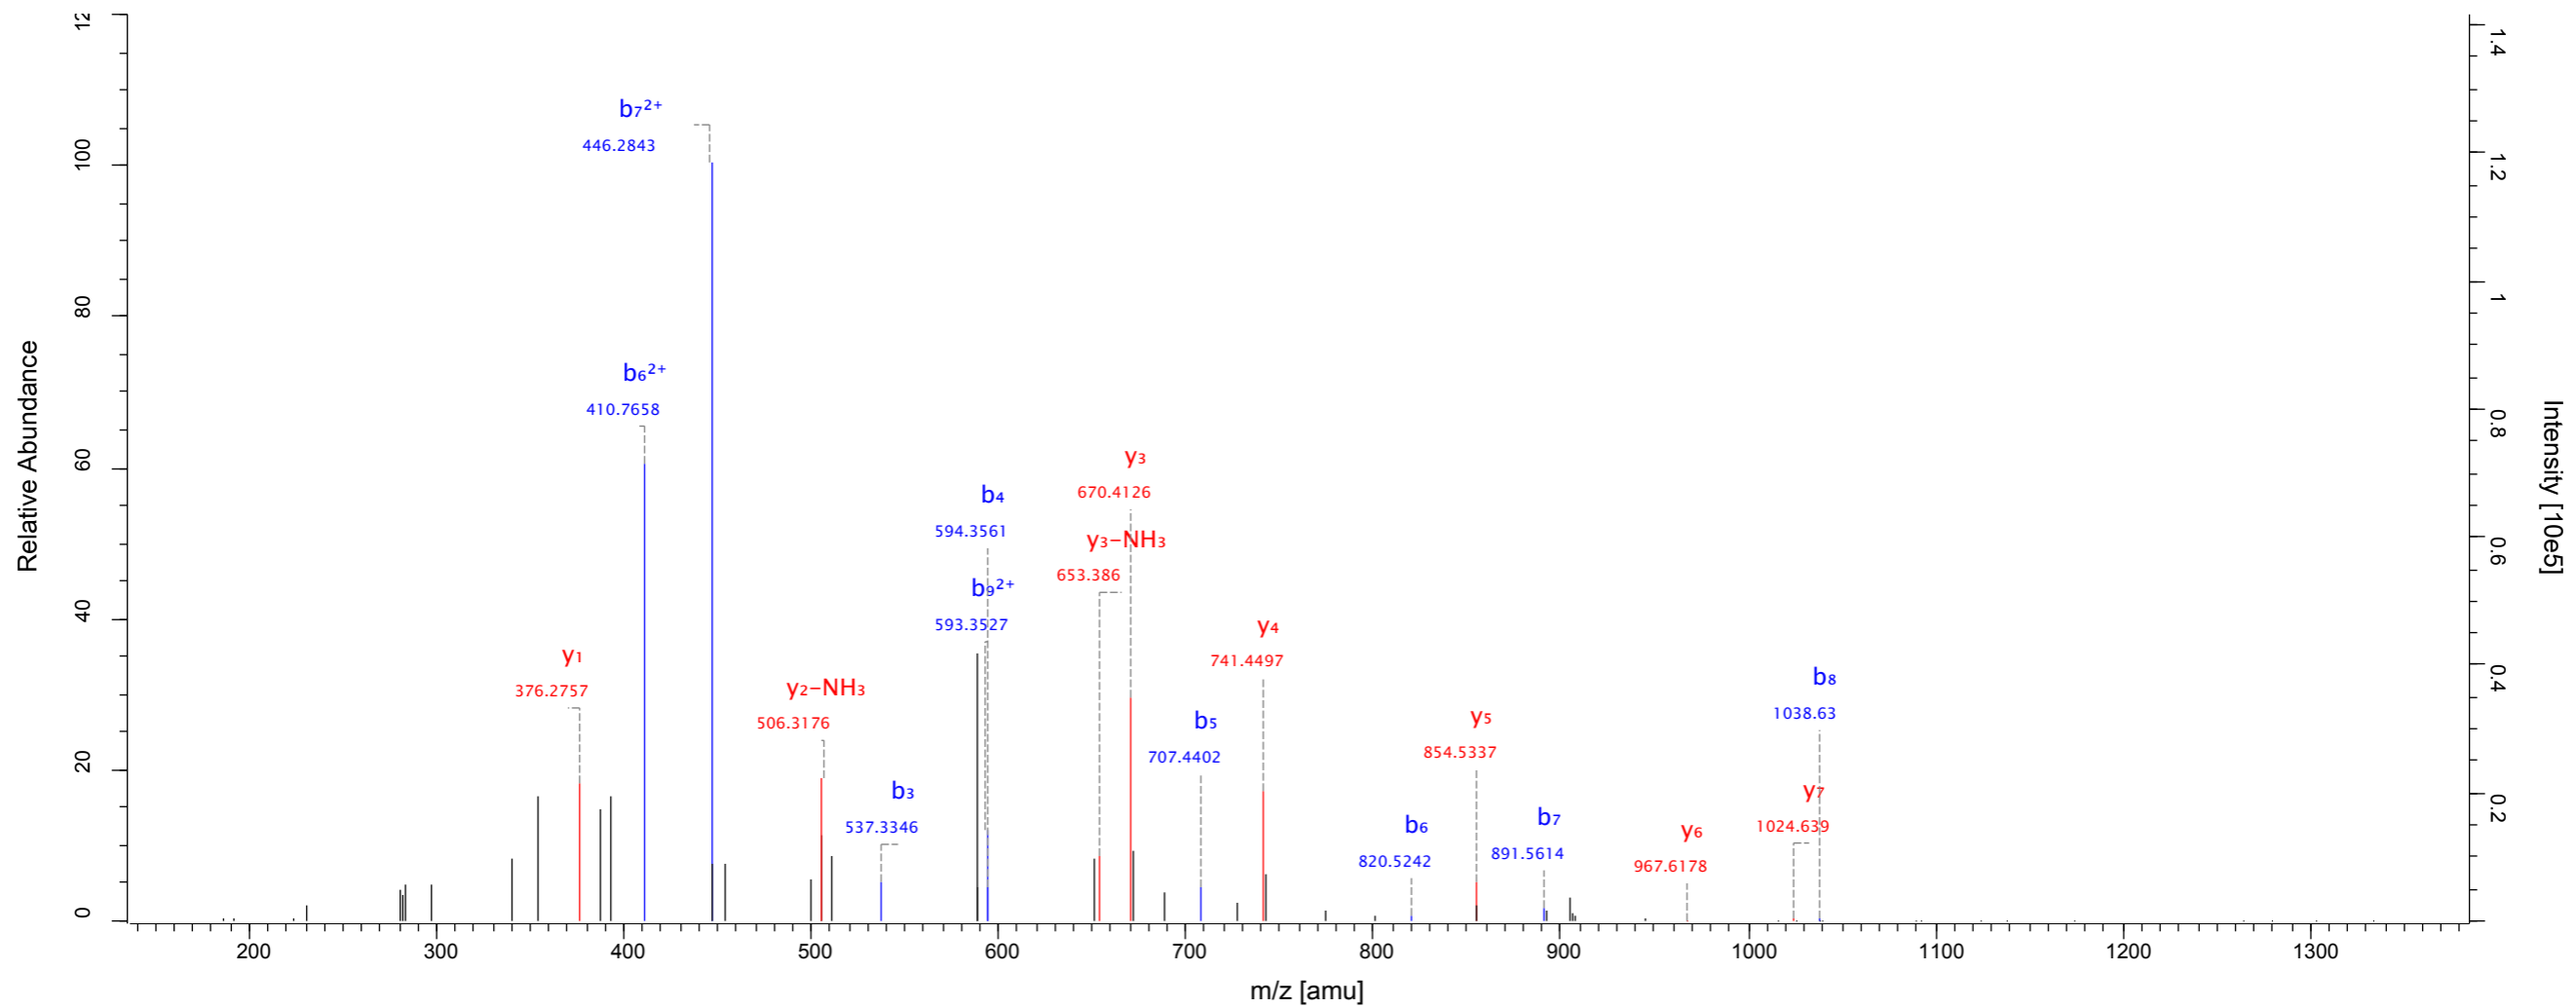

Source: mousePGCfemale-TMT6plex-group2-240ug-205min-29-30  
Scannumber: 23072  
Protein: Dcn; mCG\_11308; P28654; Q3TSV1; Q3UKR1; Q6LAK9  
Peptide Score: 125.48  
Method: ITMS; CID; 1

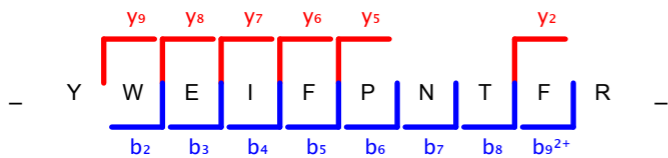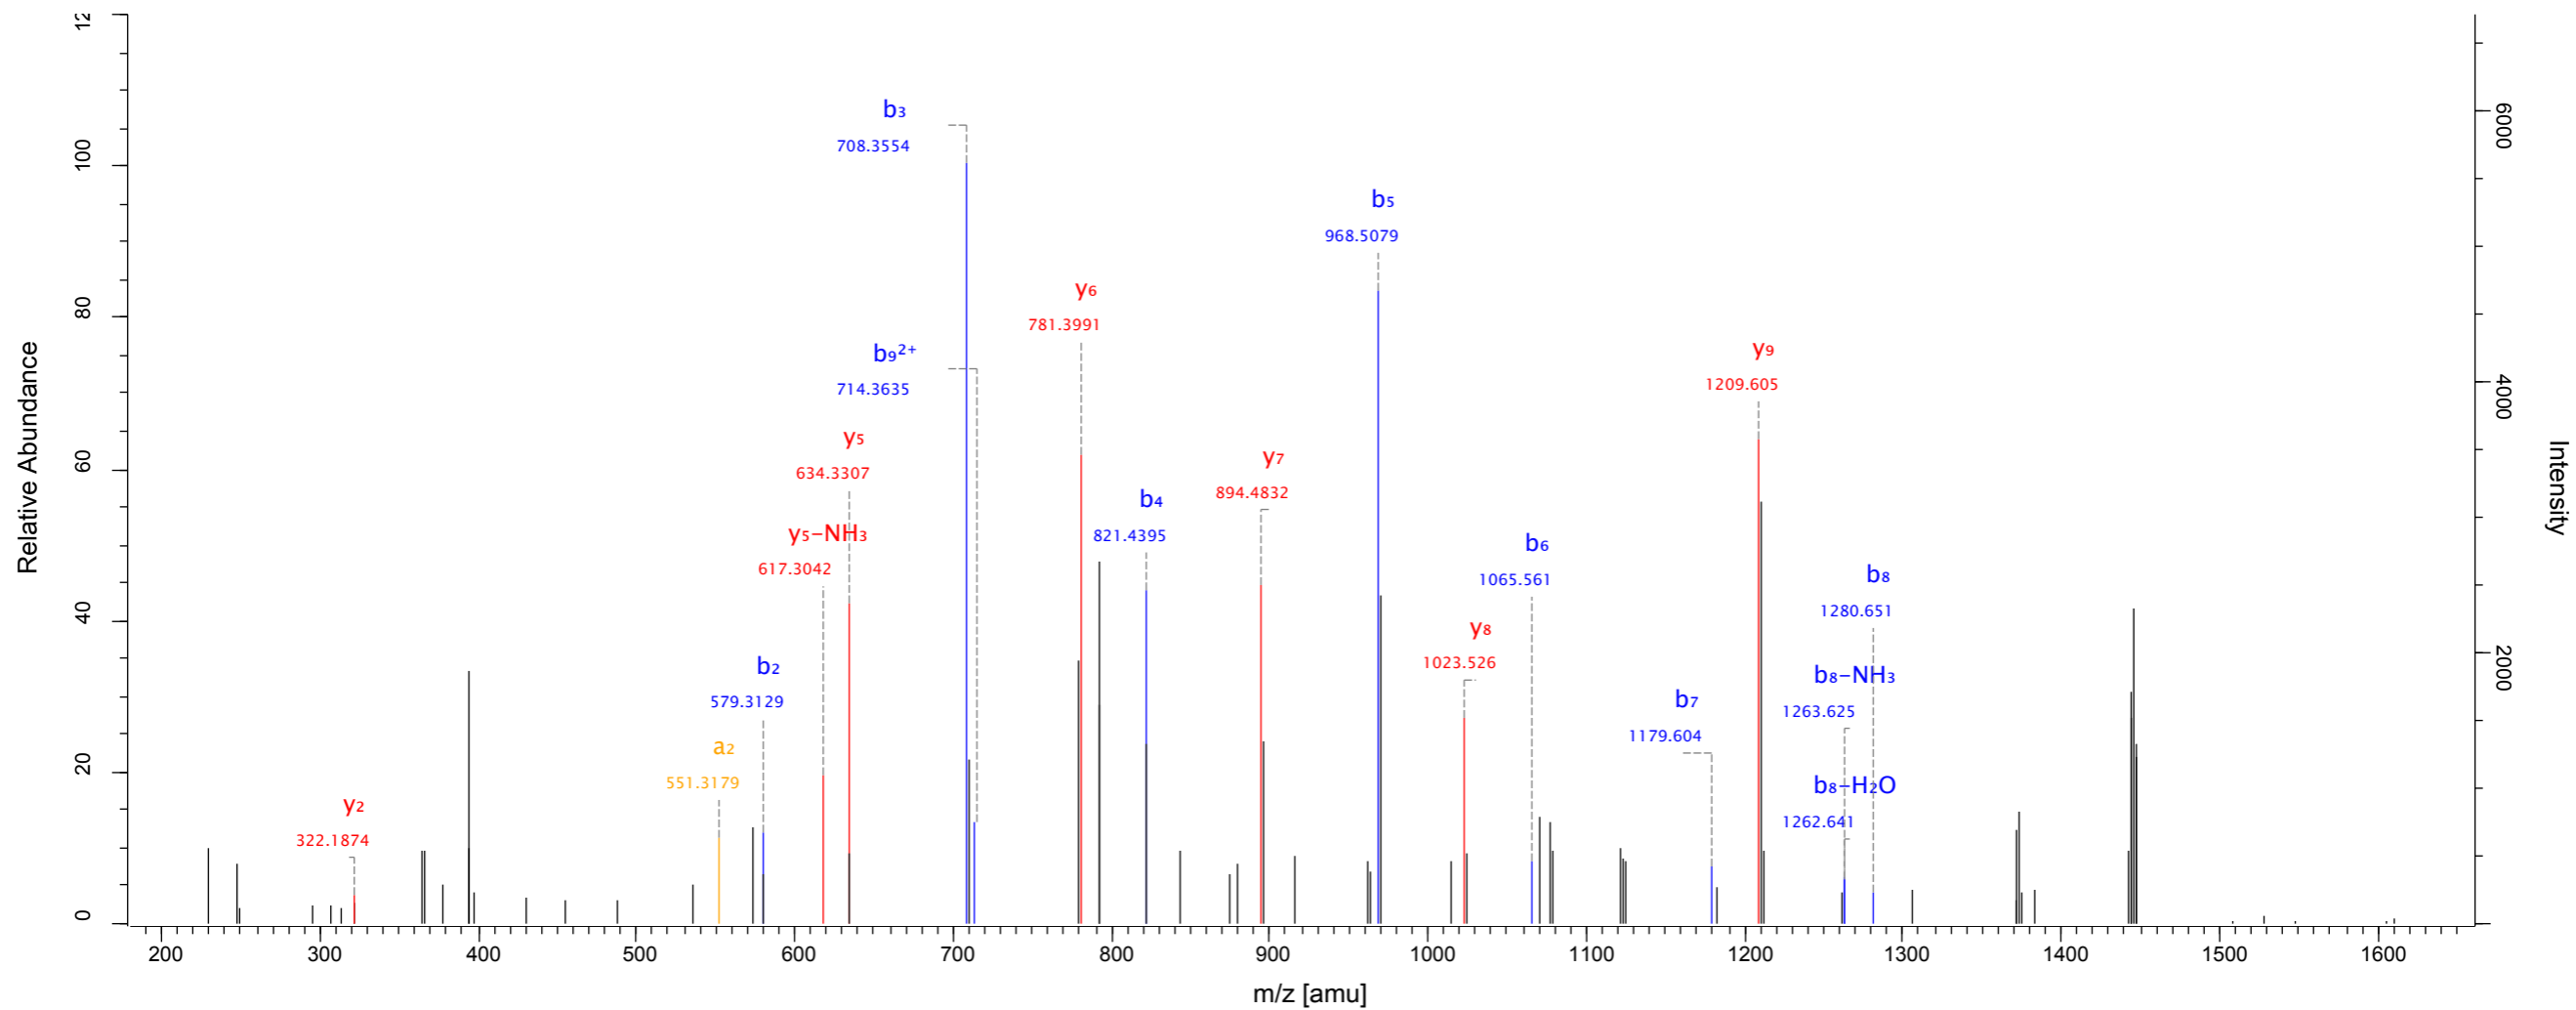

Source: mousePGCfemale-TMT6plex-group2-240ug-205min-29-30  
Scannumber: 23746  
Protein: Aadacl1; Kiaa1363; Nceh1; Q8BLF1; Q3TVS3  
Peptide Score: 122.79  
Method: ITMS; CID; 1

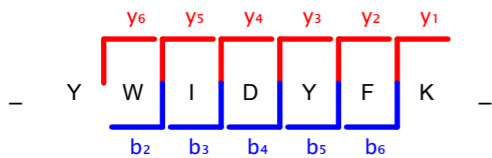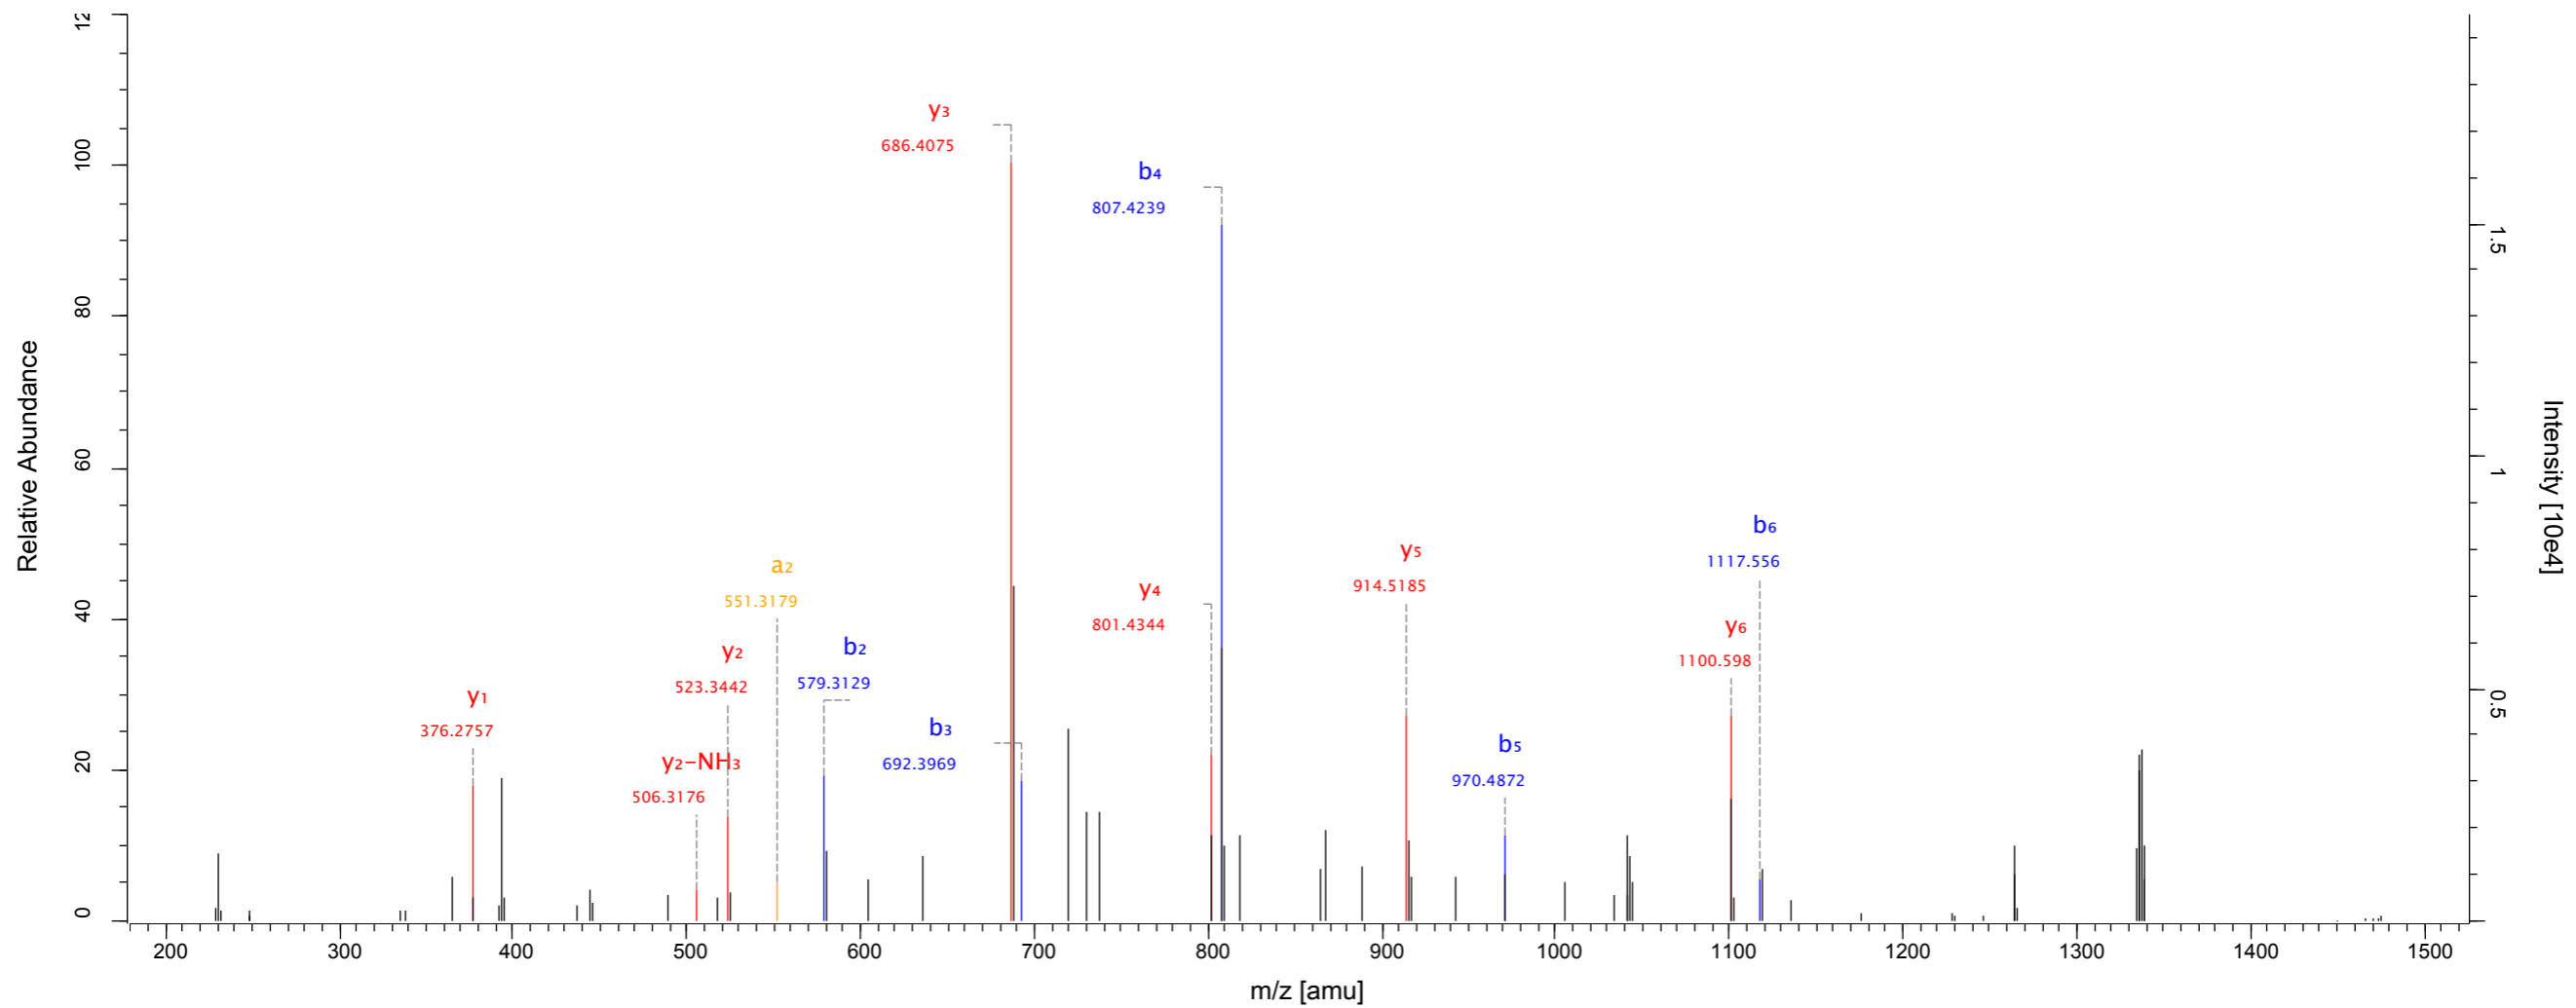

Source: mousePGCfemale-TMT6plex-group2-240ug-205min-31-32  
Scannumber: 18628  
Protein: Brca2; Fancd1; P97929; Q3TN53; Q6PB43; Q8VHD0  
Peptide Score: 115.71  
Method: ITMS; CID; 1

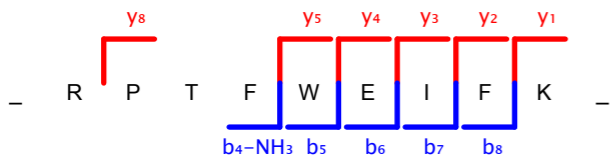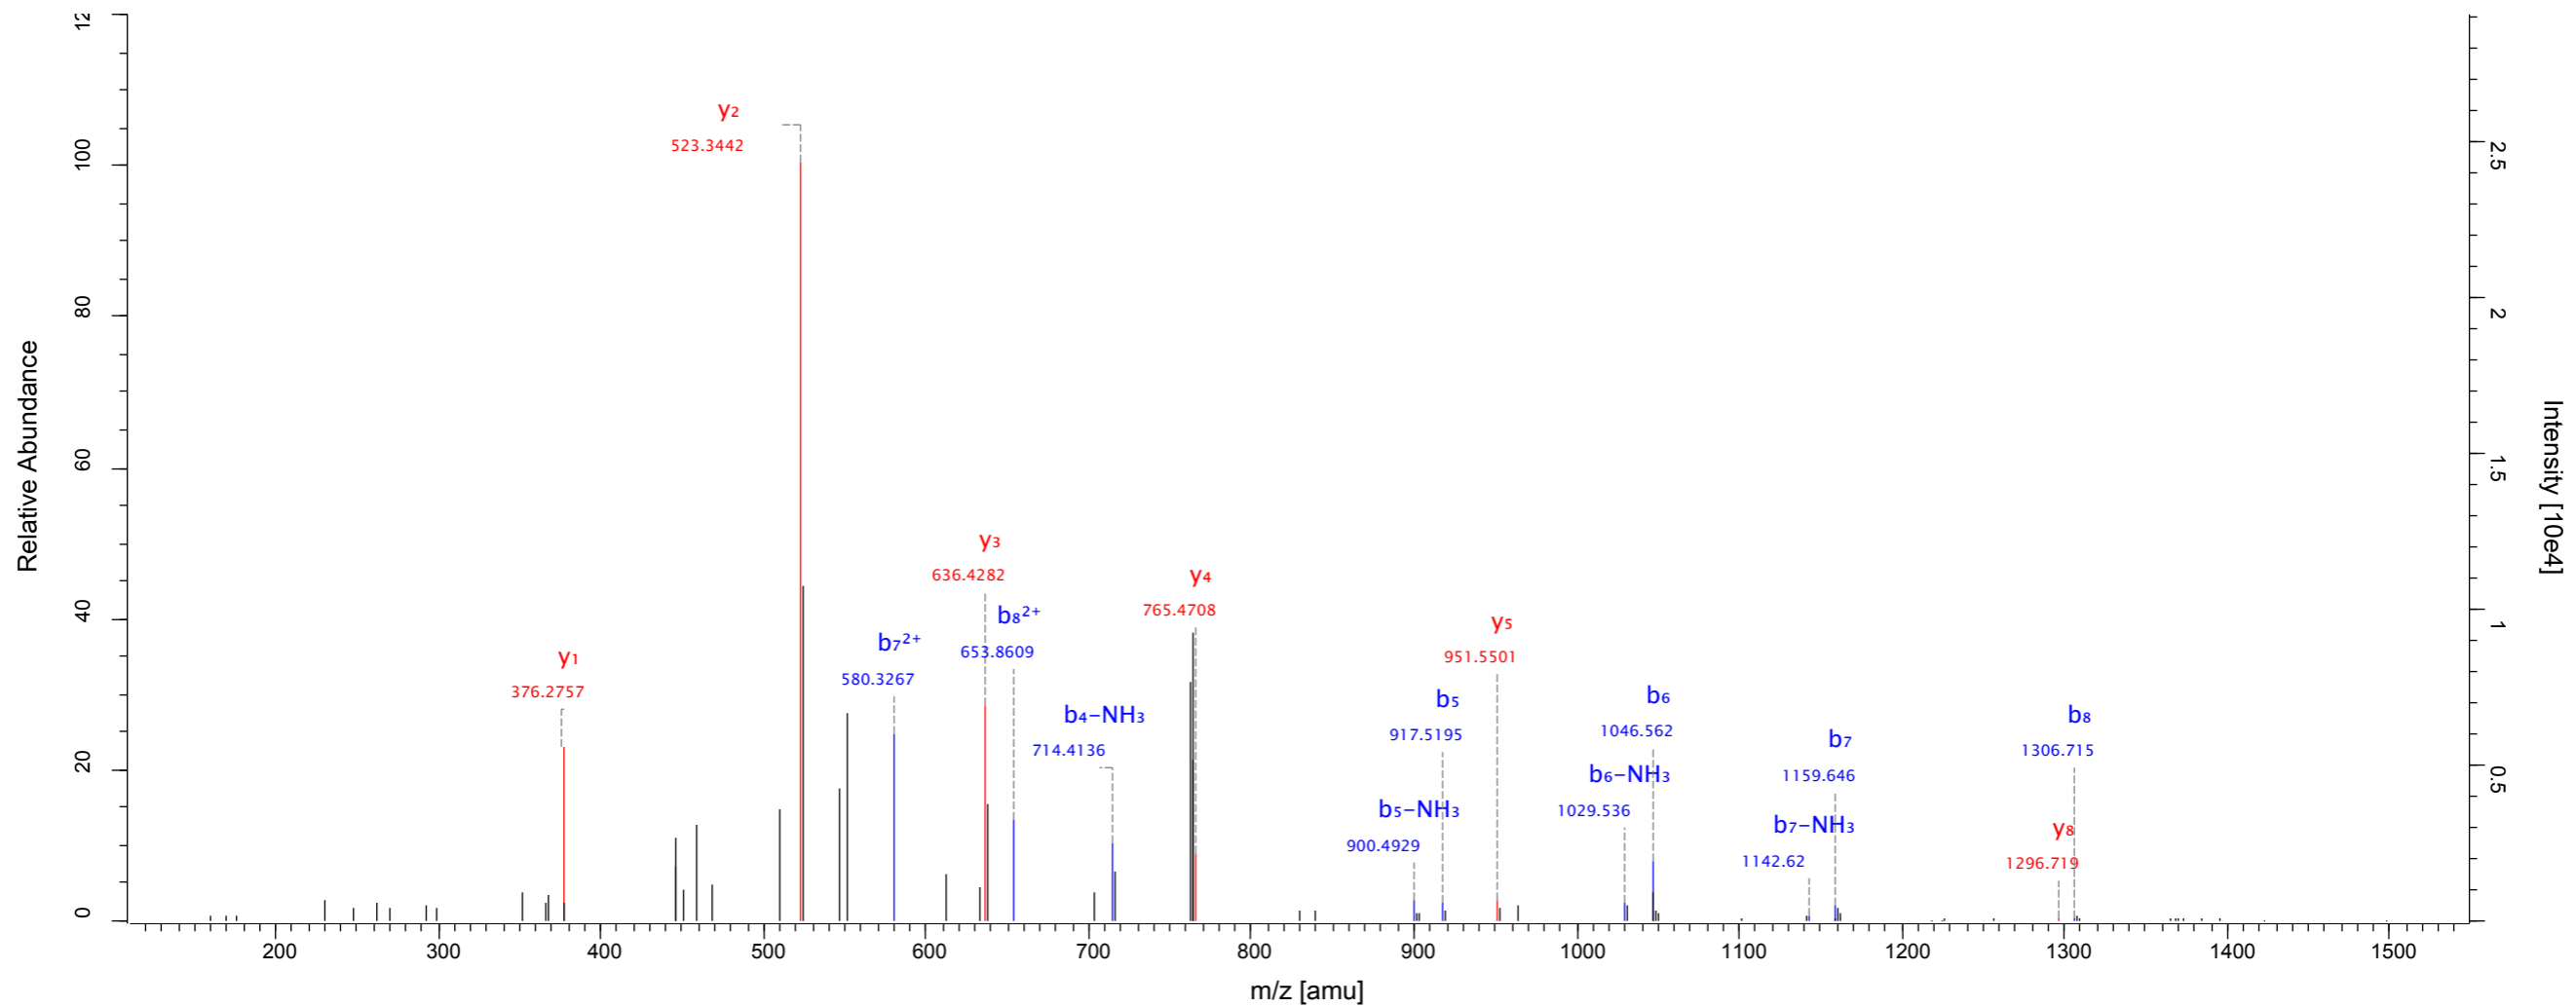



Source: mousePGCfemale-TMT6plex-group2-240ug-205min-31-32  
Scannumber: 24239  
Protein: Cpeb; Cpeb1; P70166; Q059Z2  
Peptide Score: 150.05  
Method: ITMS; CID; 1

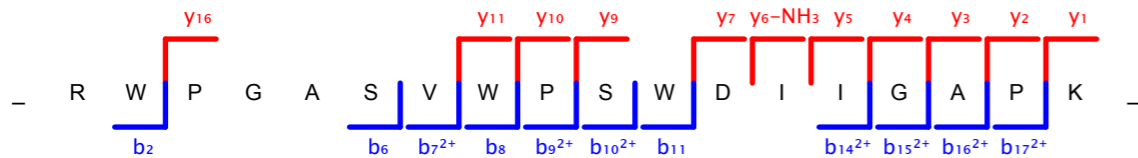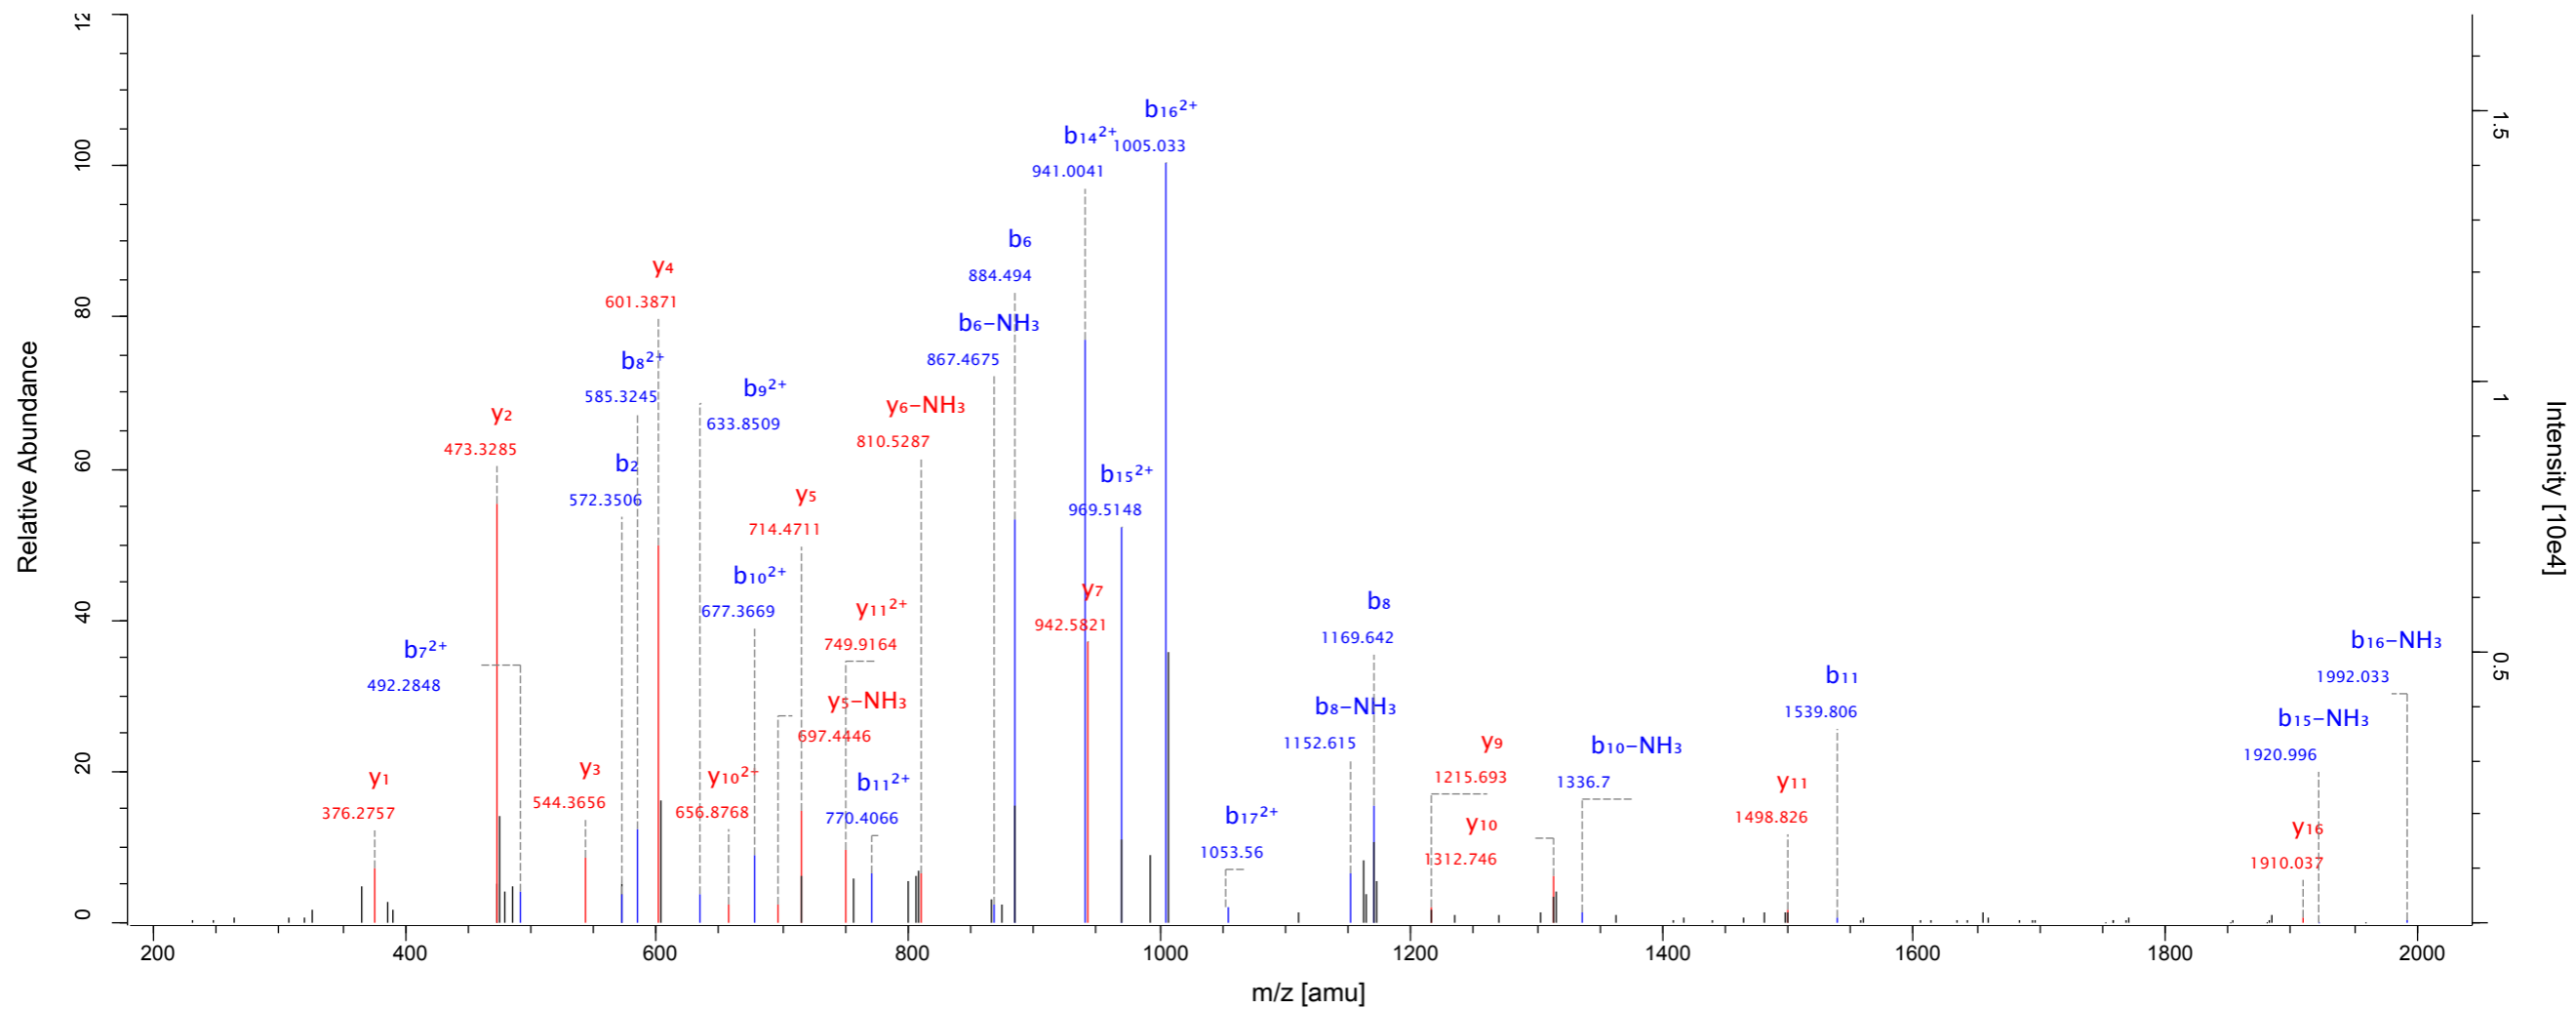

Source: mousePGCfemale-TMT6plex-group2-240ug-205min-31-32

Scannumber: 27917

Protein: Epn3; mCG\_10623; RP23-402D13.1-001; Epn2; RP23-155J3.7-006; mKIAA1065; Epn2; Epn2; RP23-155J3.7-004; Epn2; RP23-155J3.7-005; Q91W69; B1AT70; Q3TZ84; Q5NCM5; Q69ZS5; E9Q1Q2; Q8CHU3-1; Q8CHU3; Q8CHU3-2; Q8CHU3; Q5NCM7; Q

Peptide Score: 175.73

Method: ITMS; CID; 1

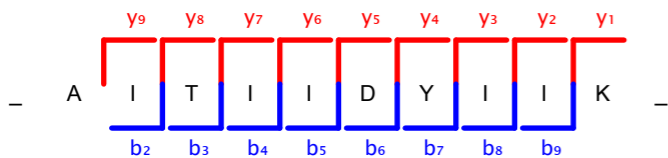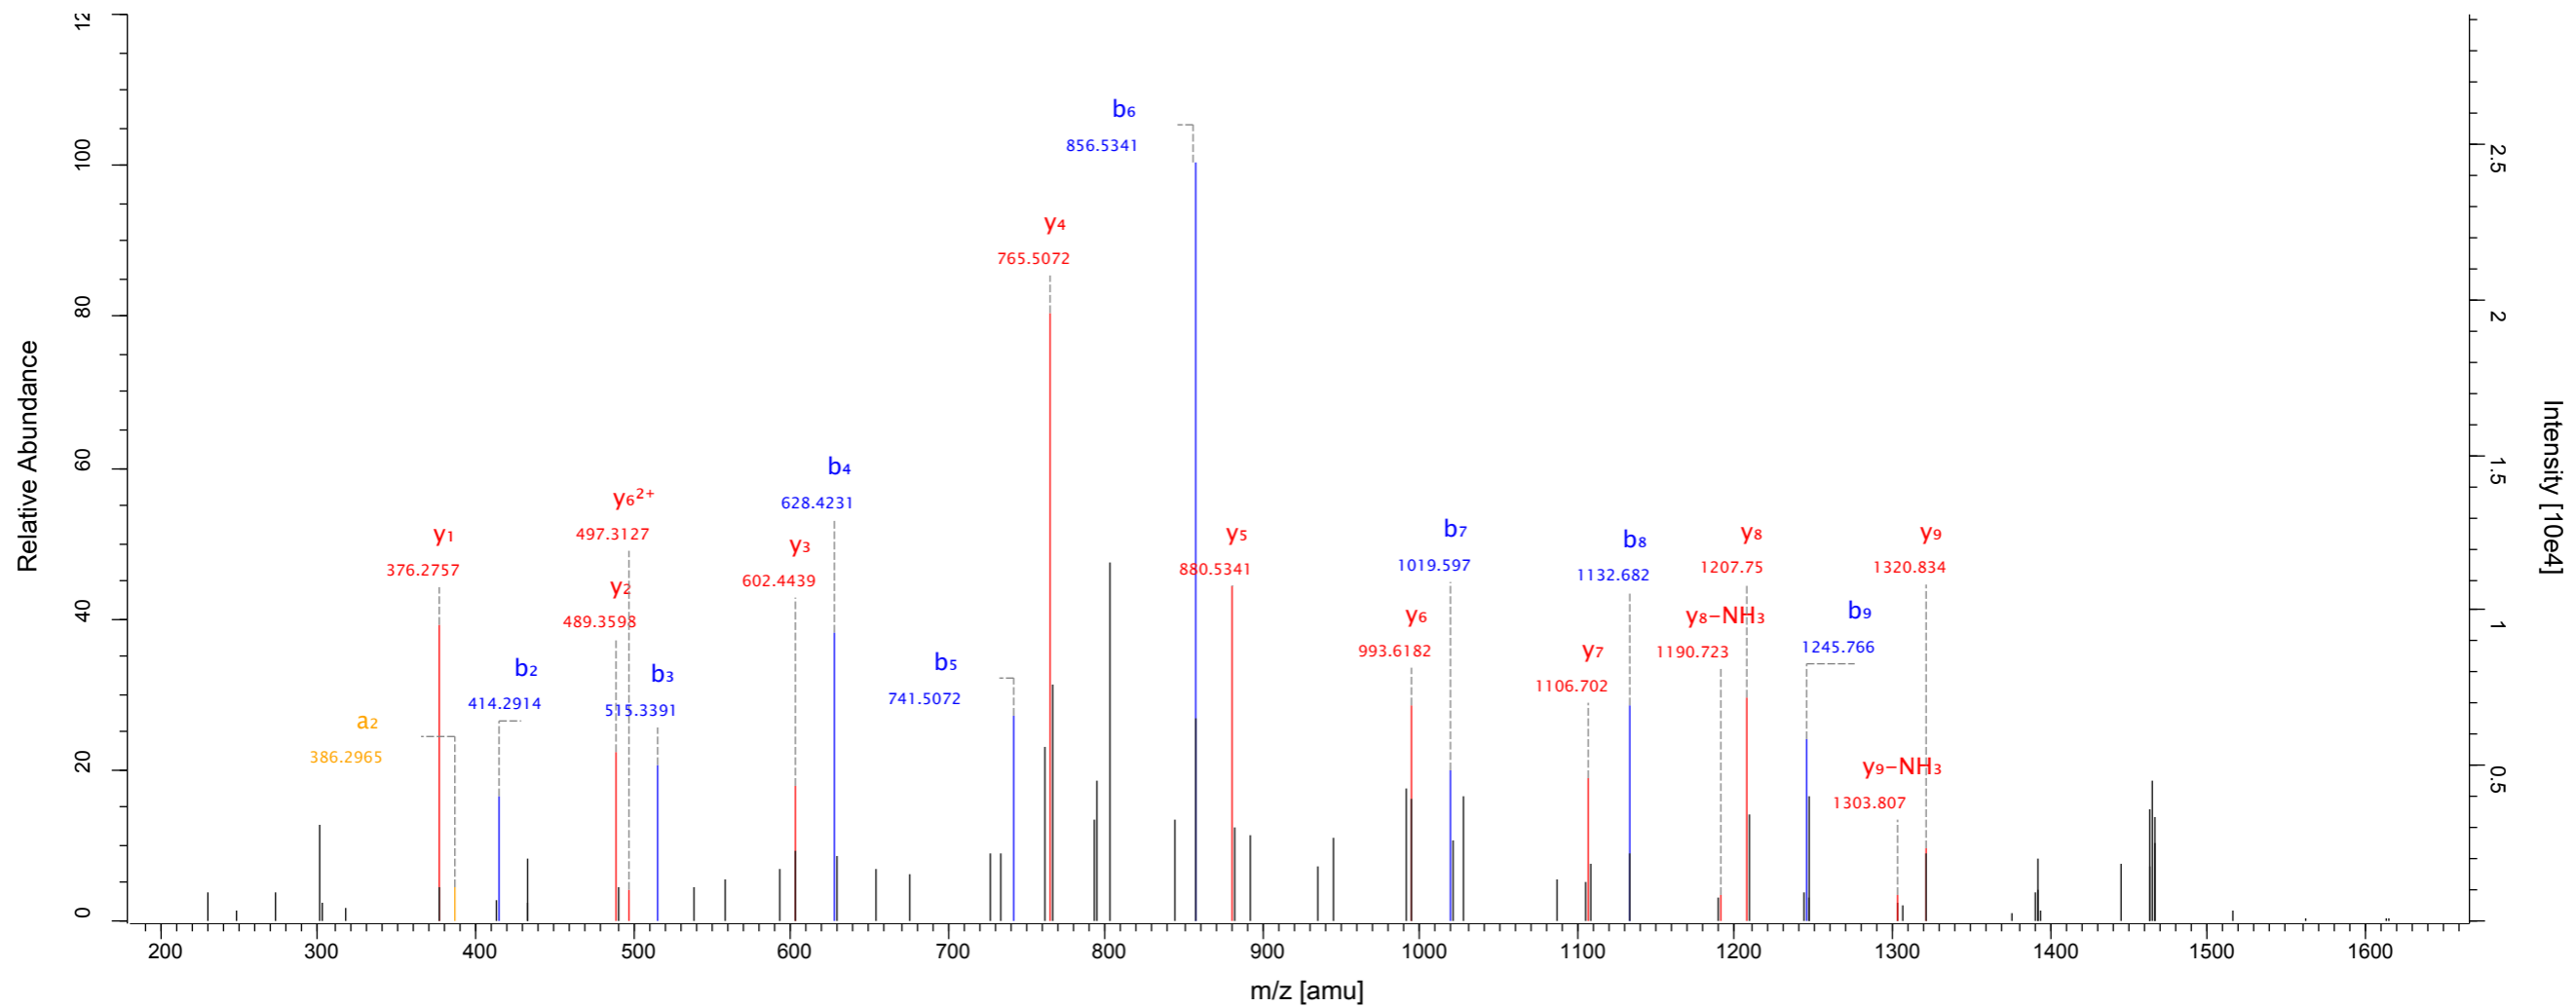

Source: mousePGCfemale-TMT6plex-group2-240ug-205min-33-34  
Scannumber: 24476  
Protein: Cyp20a1; Q8BKE6; Q80Y48  
Peptide Score: 173.37  
Method: ITMS; CID; 1

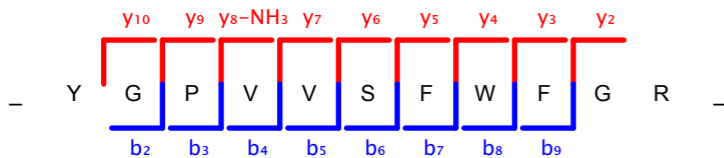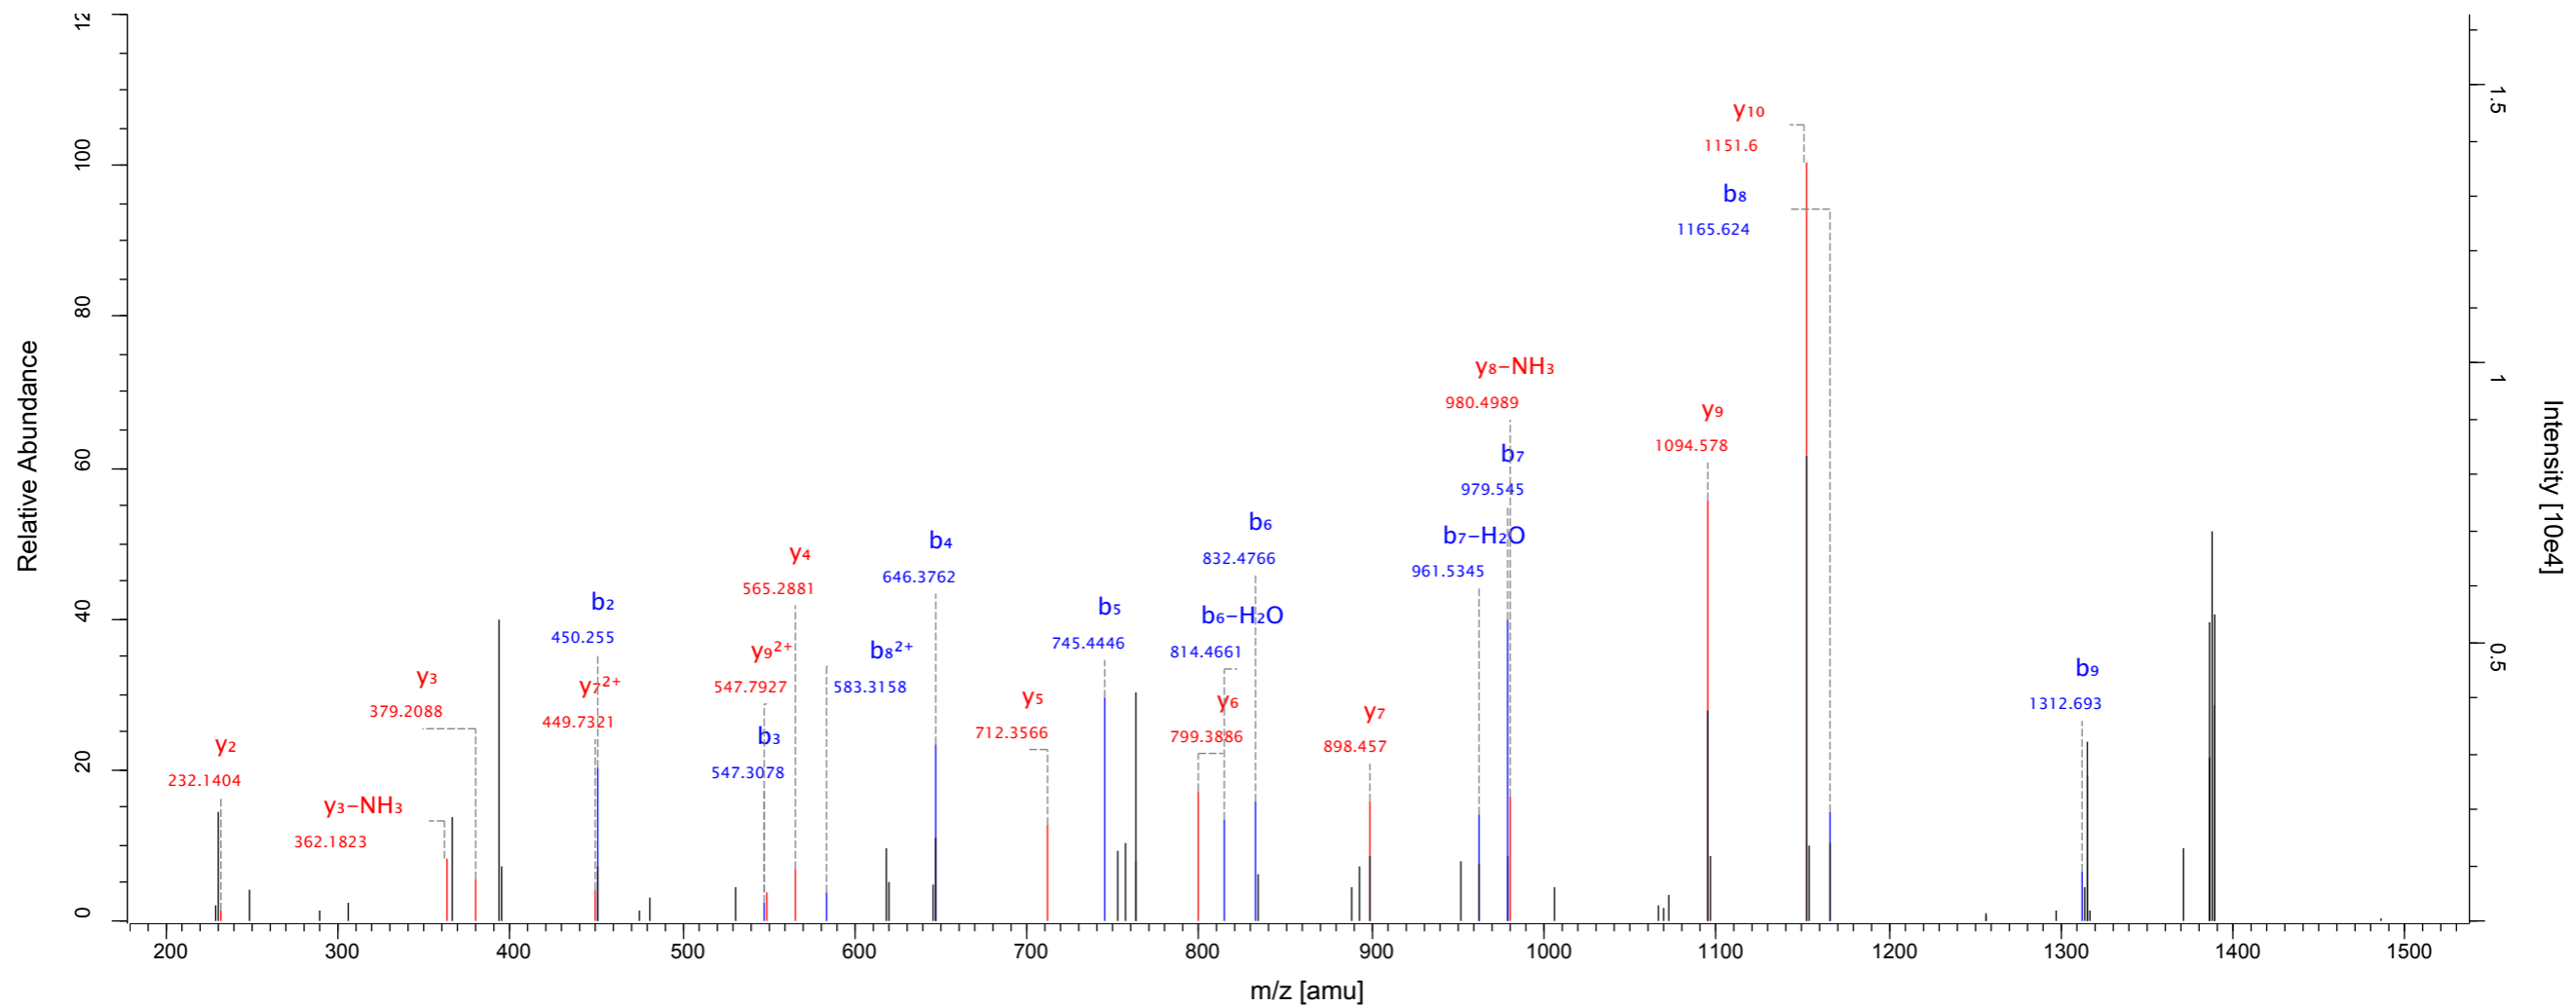

Source: mousePGCfemale-TMT6plex-group2-240ug-205min-35-36  
 Scannumber: 25628  
 Protein: Galnt7; Galnt7; Galnt7; Q80VA0-1; Q80VA0; Q3U8I4; Q3U9K4; Q80VA0-2; Q80VA0; Q80VA0-3; Q80VA0  
 Peptide Score: 204.07  
 Method: ITMS; CID; 1

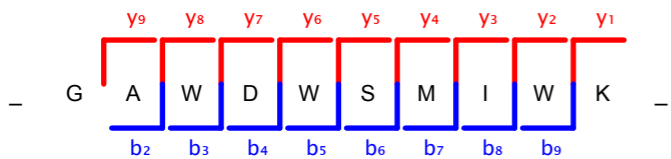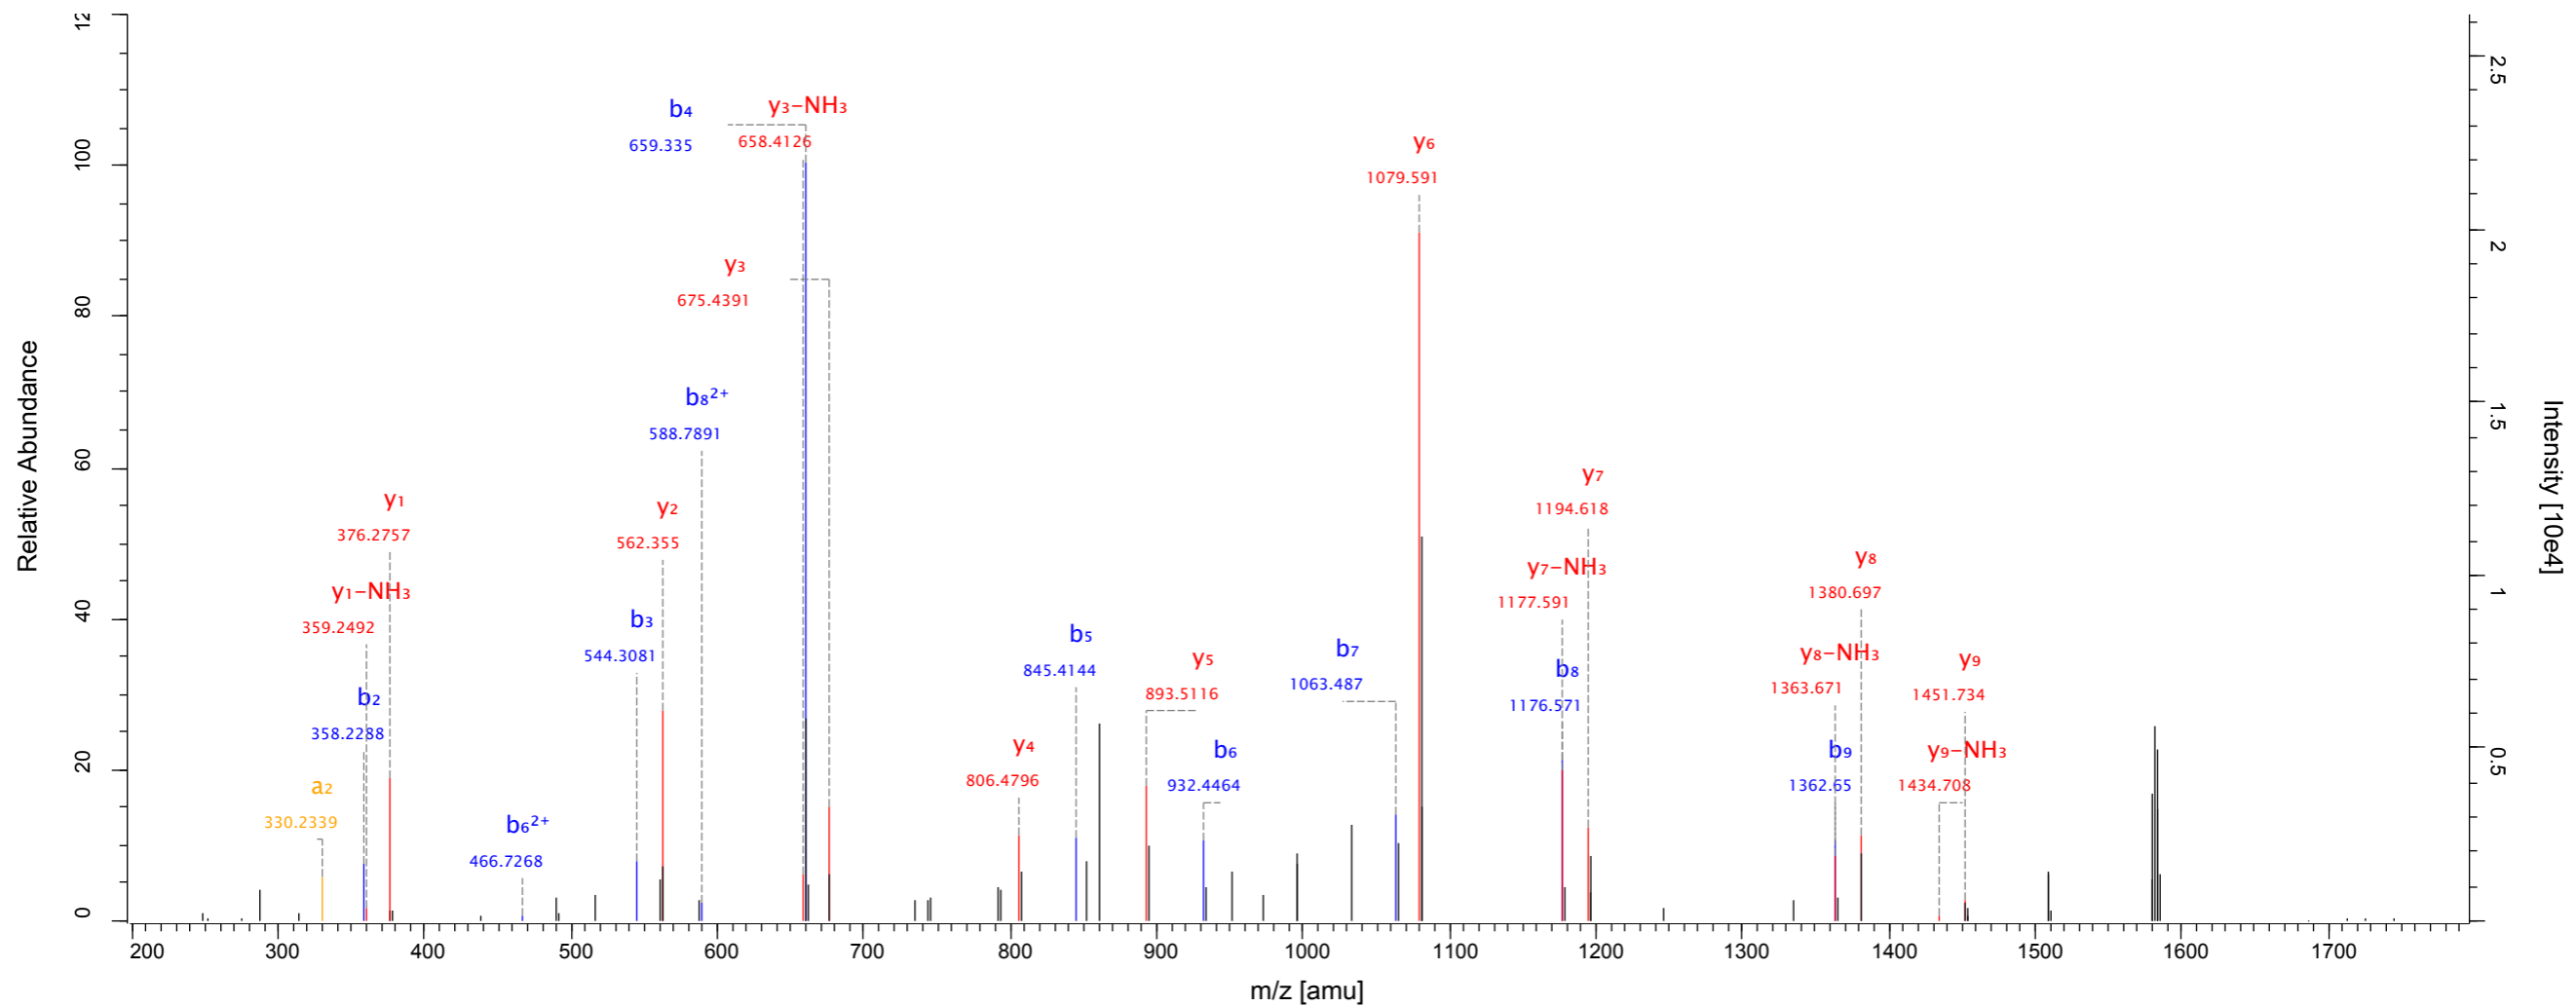

Source: mousePGCfemale-TMT6plex-group2-240ug-205min-37-38  
Scannumber: 26203  
Protein: Kit; Kit; Sl; Q8C8K9; P05532; C7ENW2; Q3ULJ6; Q6QJB7; Q6QJB8; Q7TS86  
Peptide Score: 144.77  
Method: ITMS; CID; 1

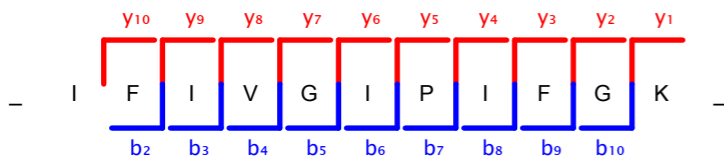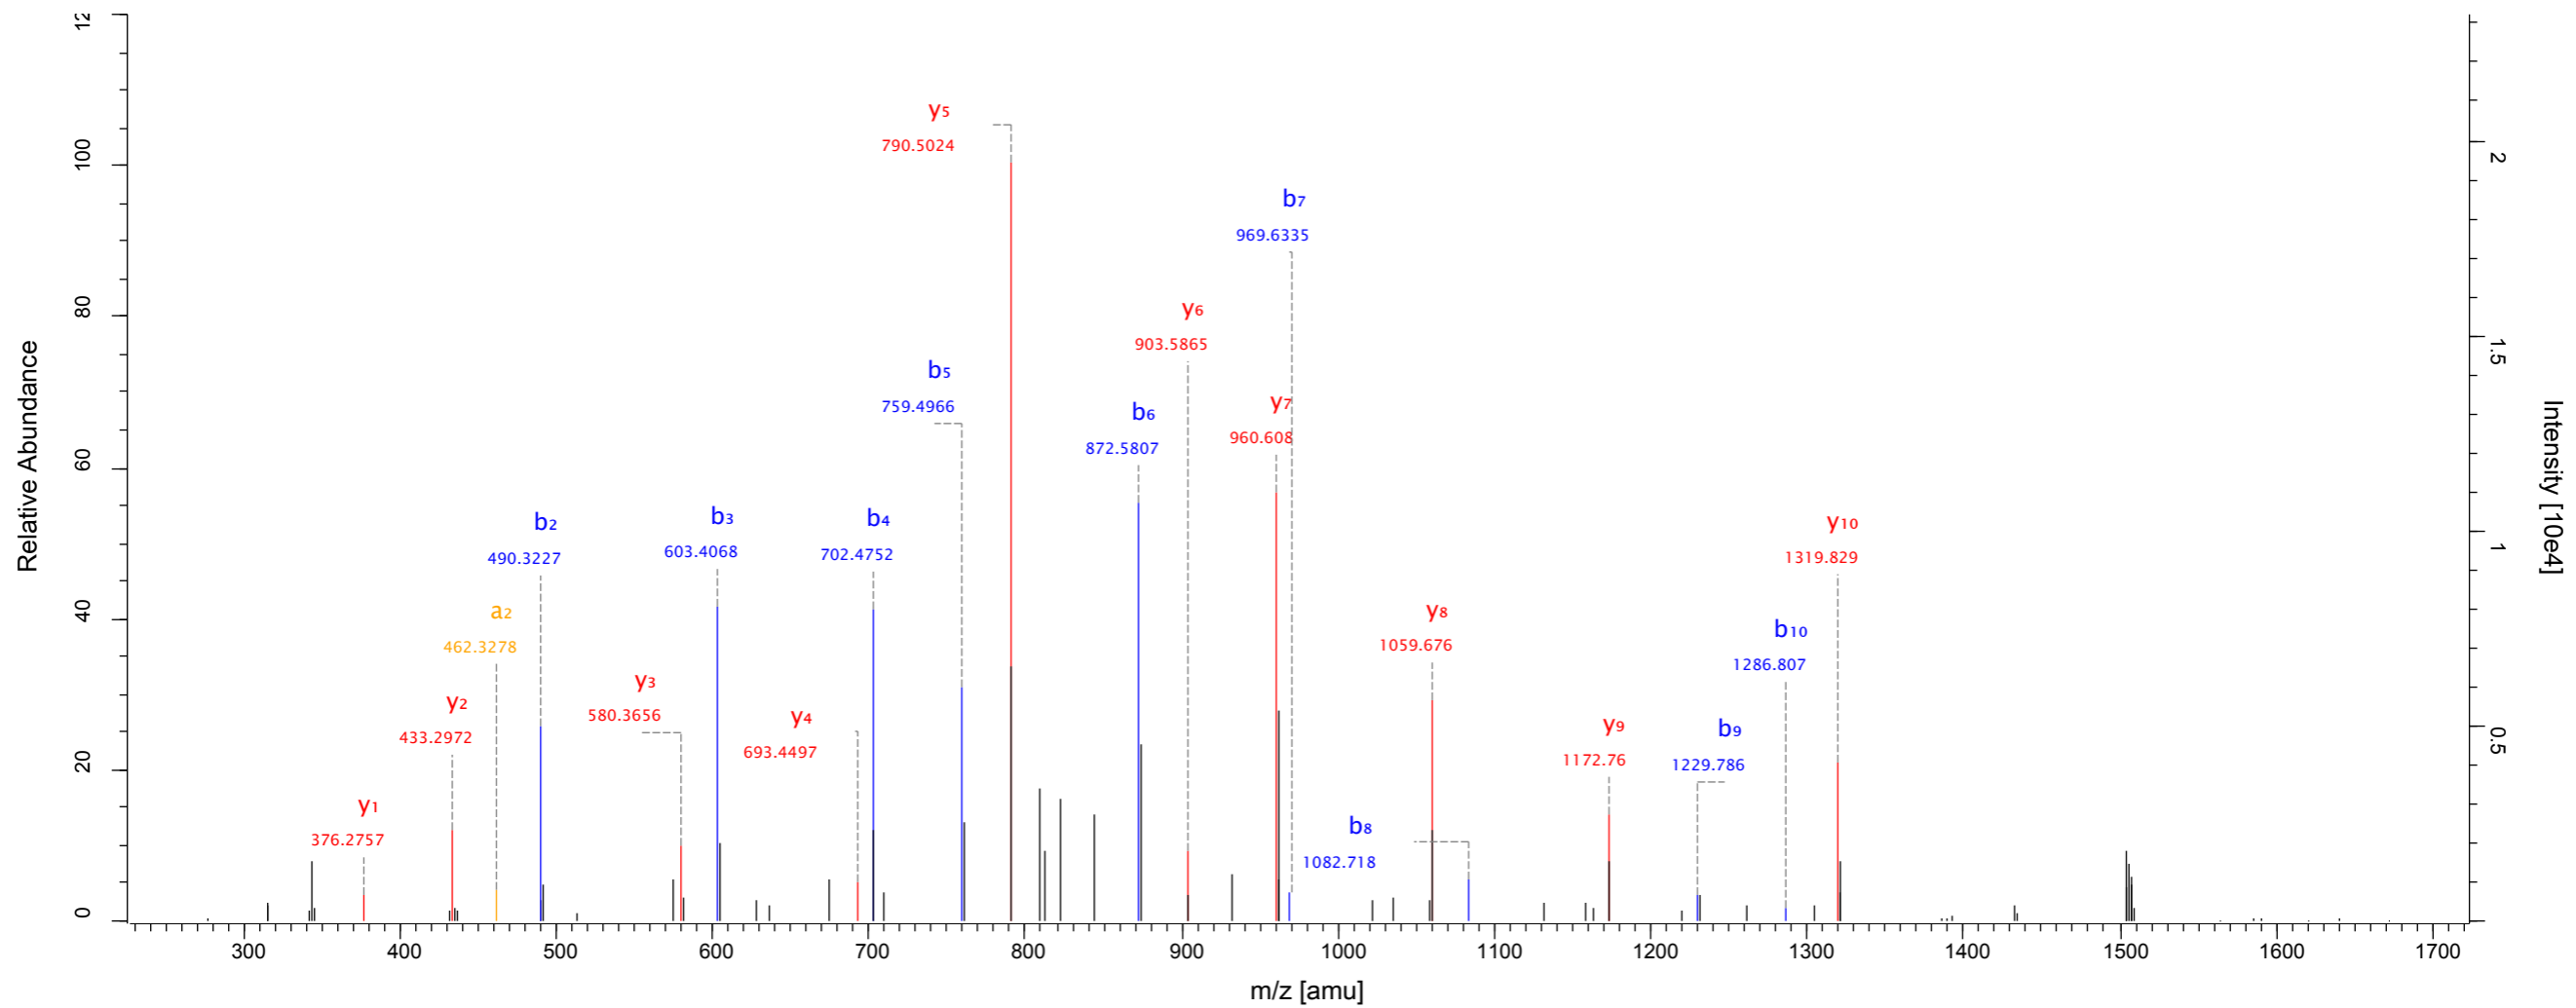

Source: mousePGCfemale-TMT6plex-group2-240ug-205min-39-40  
Scannumber: 21160  
Protein: Cyp11a; Cyp11a1; Q9QZ82; Q6NV84  
Peptide Score: 227.81  
Method: ITMS; CID; 1

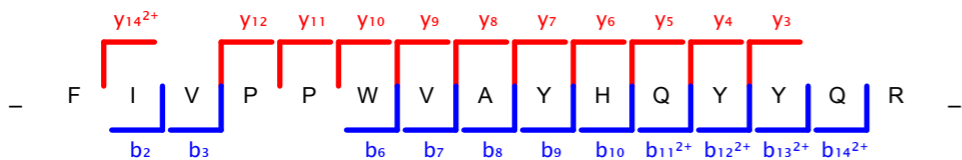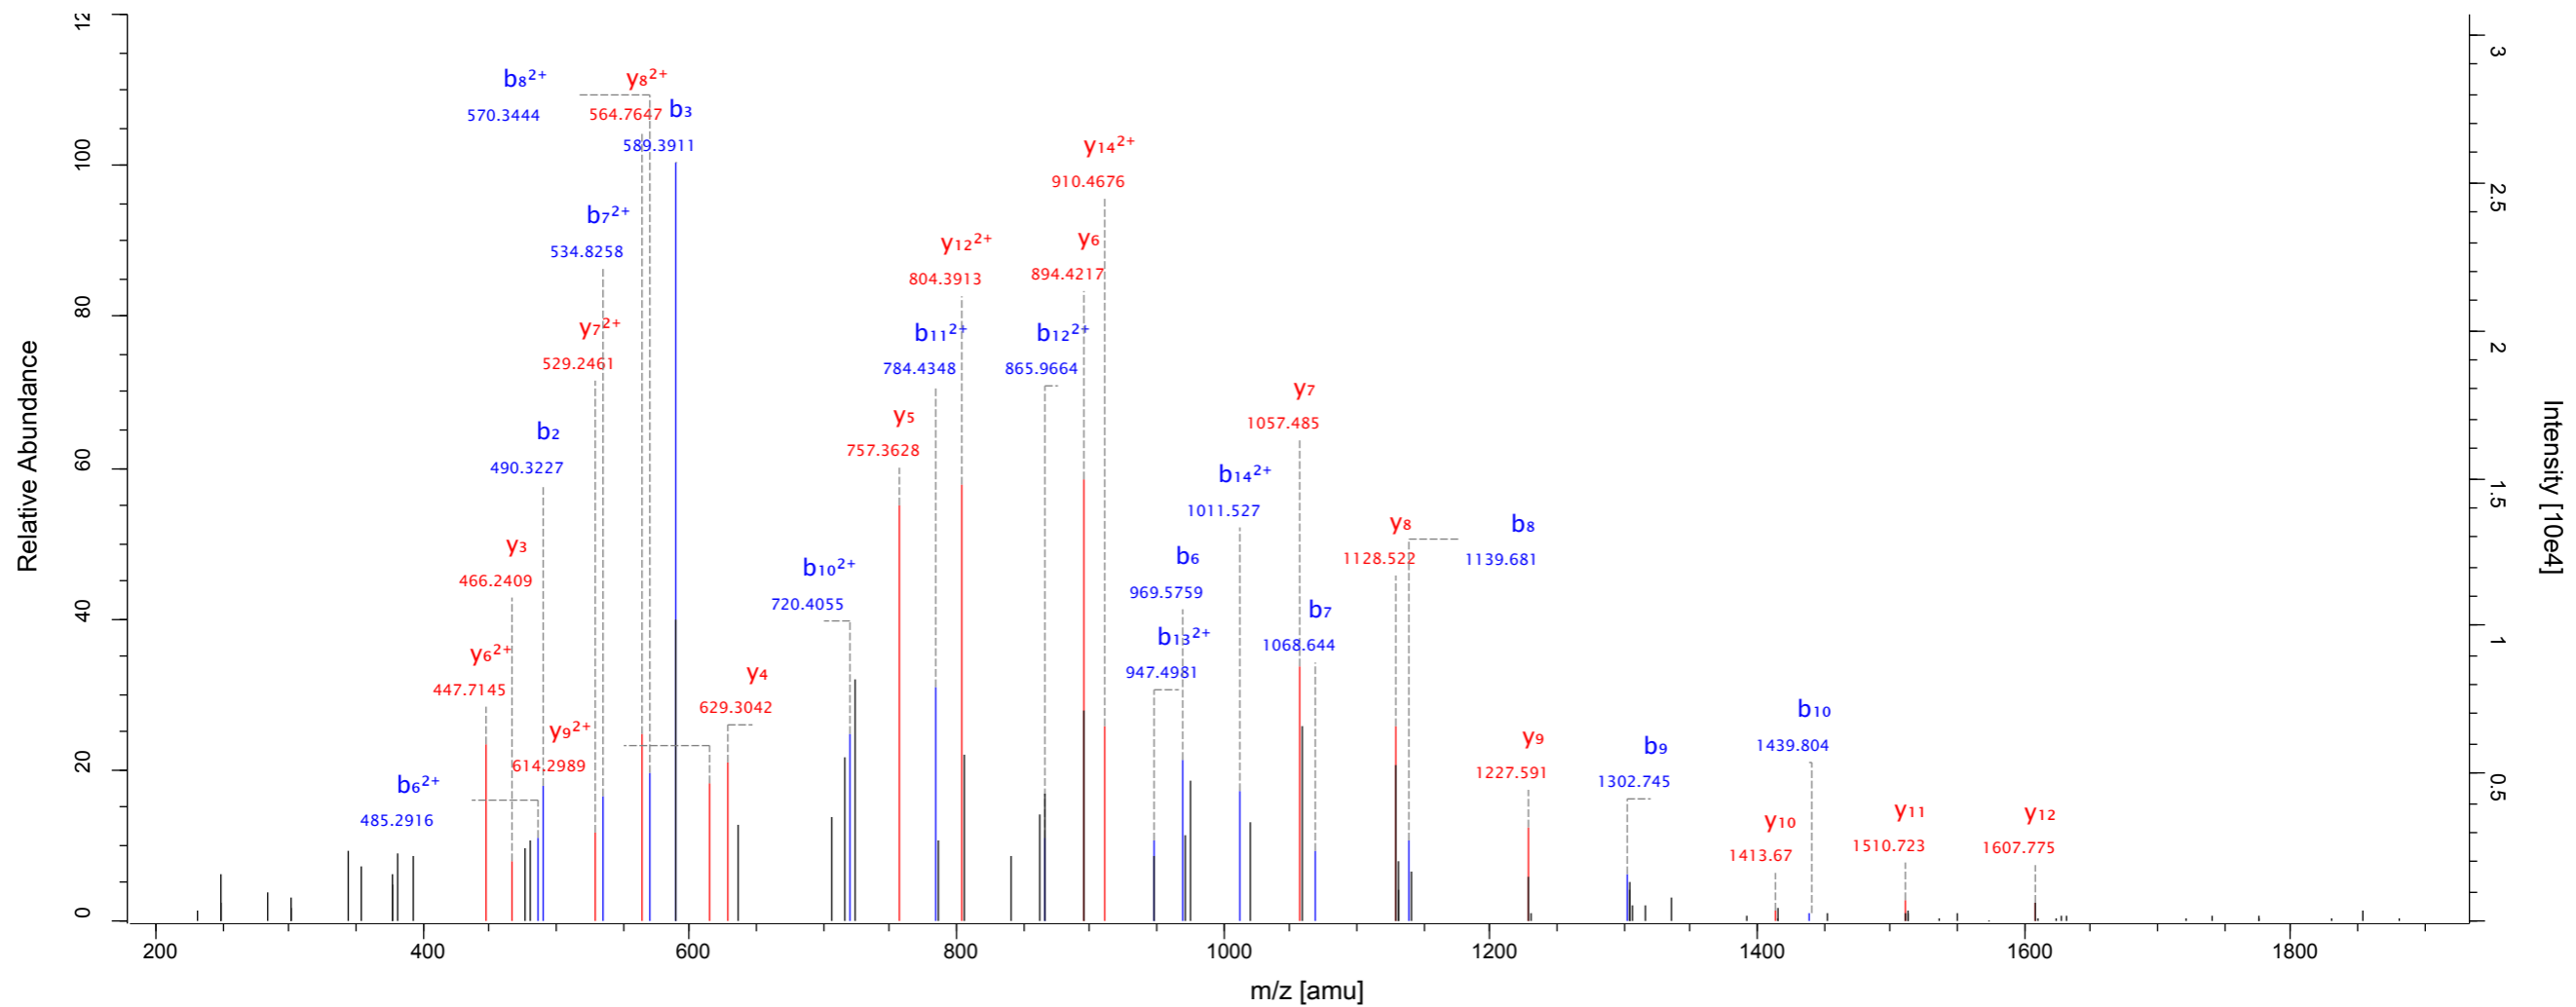

Source: mousePGCfemale-TMT6plex-group2-240ug-205min-39-40  
Scannumber: 27862  
Protein: Golph3; Gpp34; Q9CRA5-1; Q9CRA5; Q3TIL4; Q3UWP6  
Peptide Score: 107.61  
Method: ITMS; CID; 1

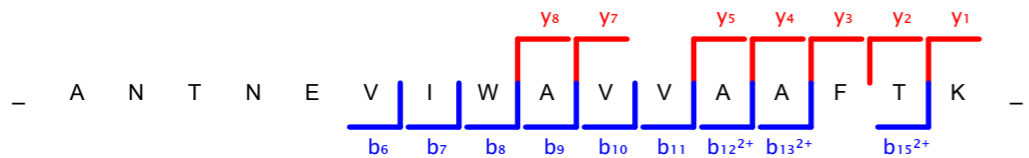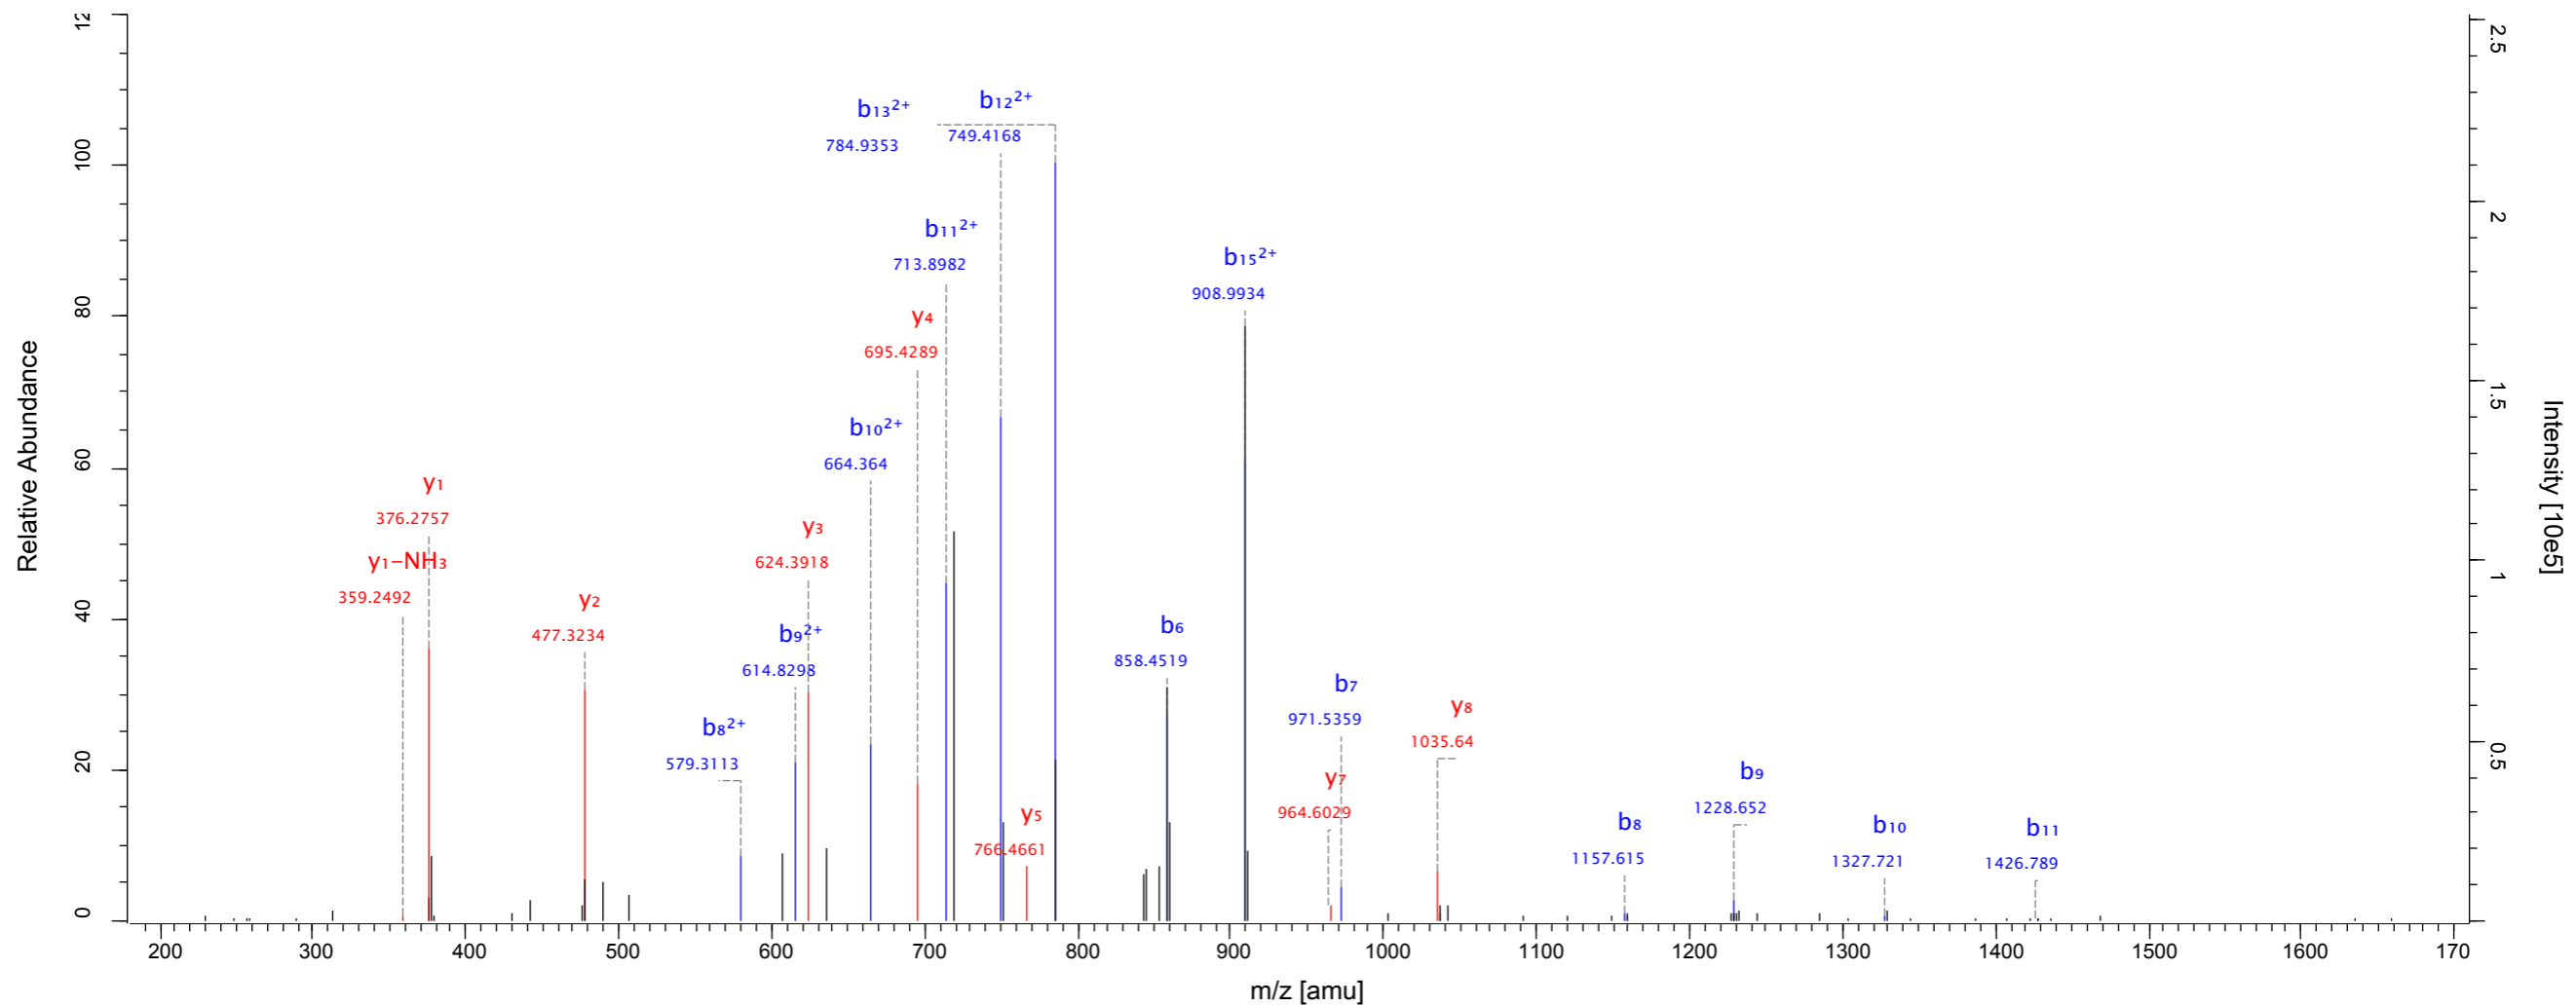

Source: mousePGCfemale-TMT6plex-group2-240ug-205min-39-40  
 Scannumber: 27930  
 Protein: Impa2; mCG\_10505; Q91UZ5; Q3TAU6; Q3TC14; Q3U3B7; Q924A9  
 Peptide Score: 151.07  
 Method: ITMS; CID; 1

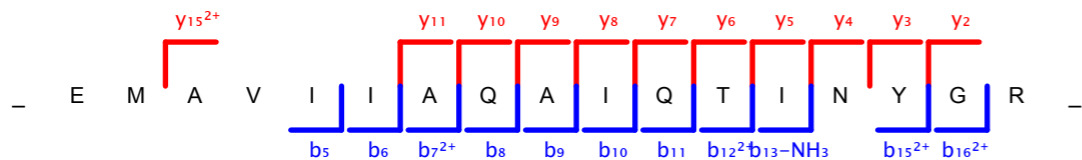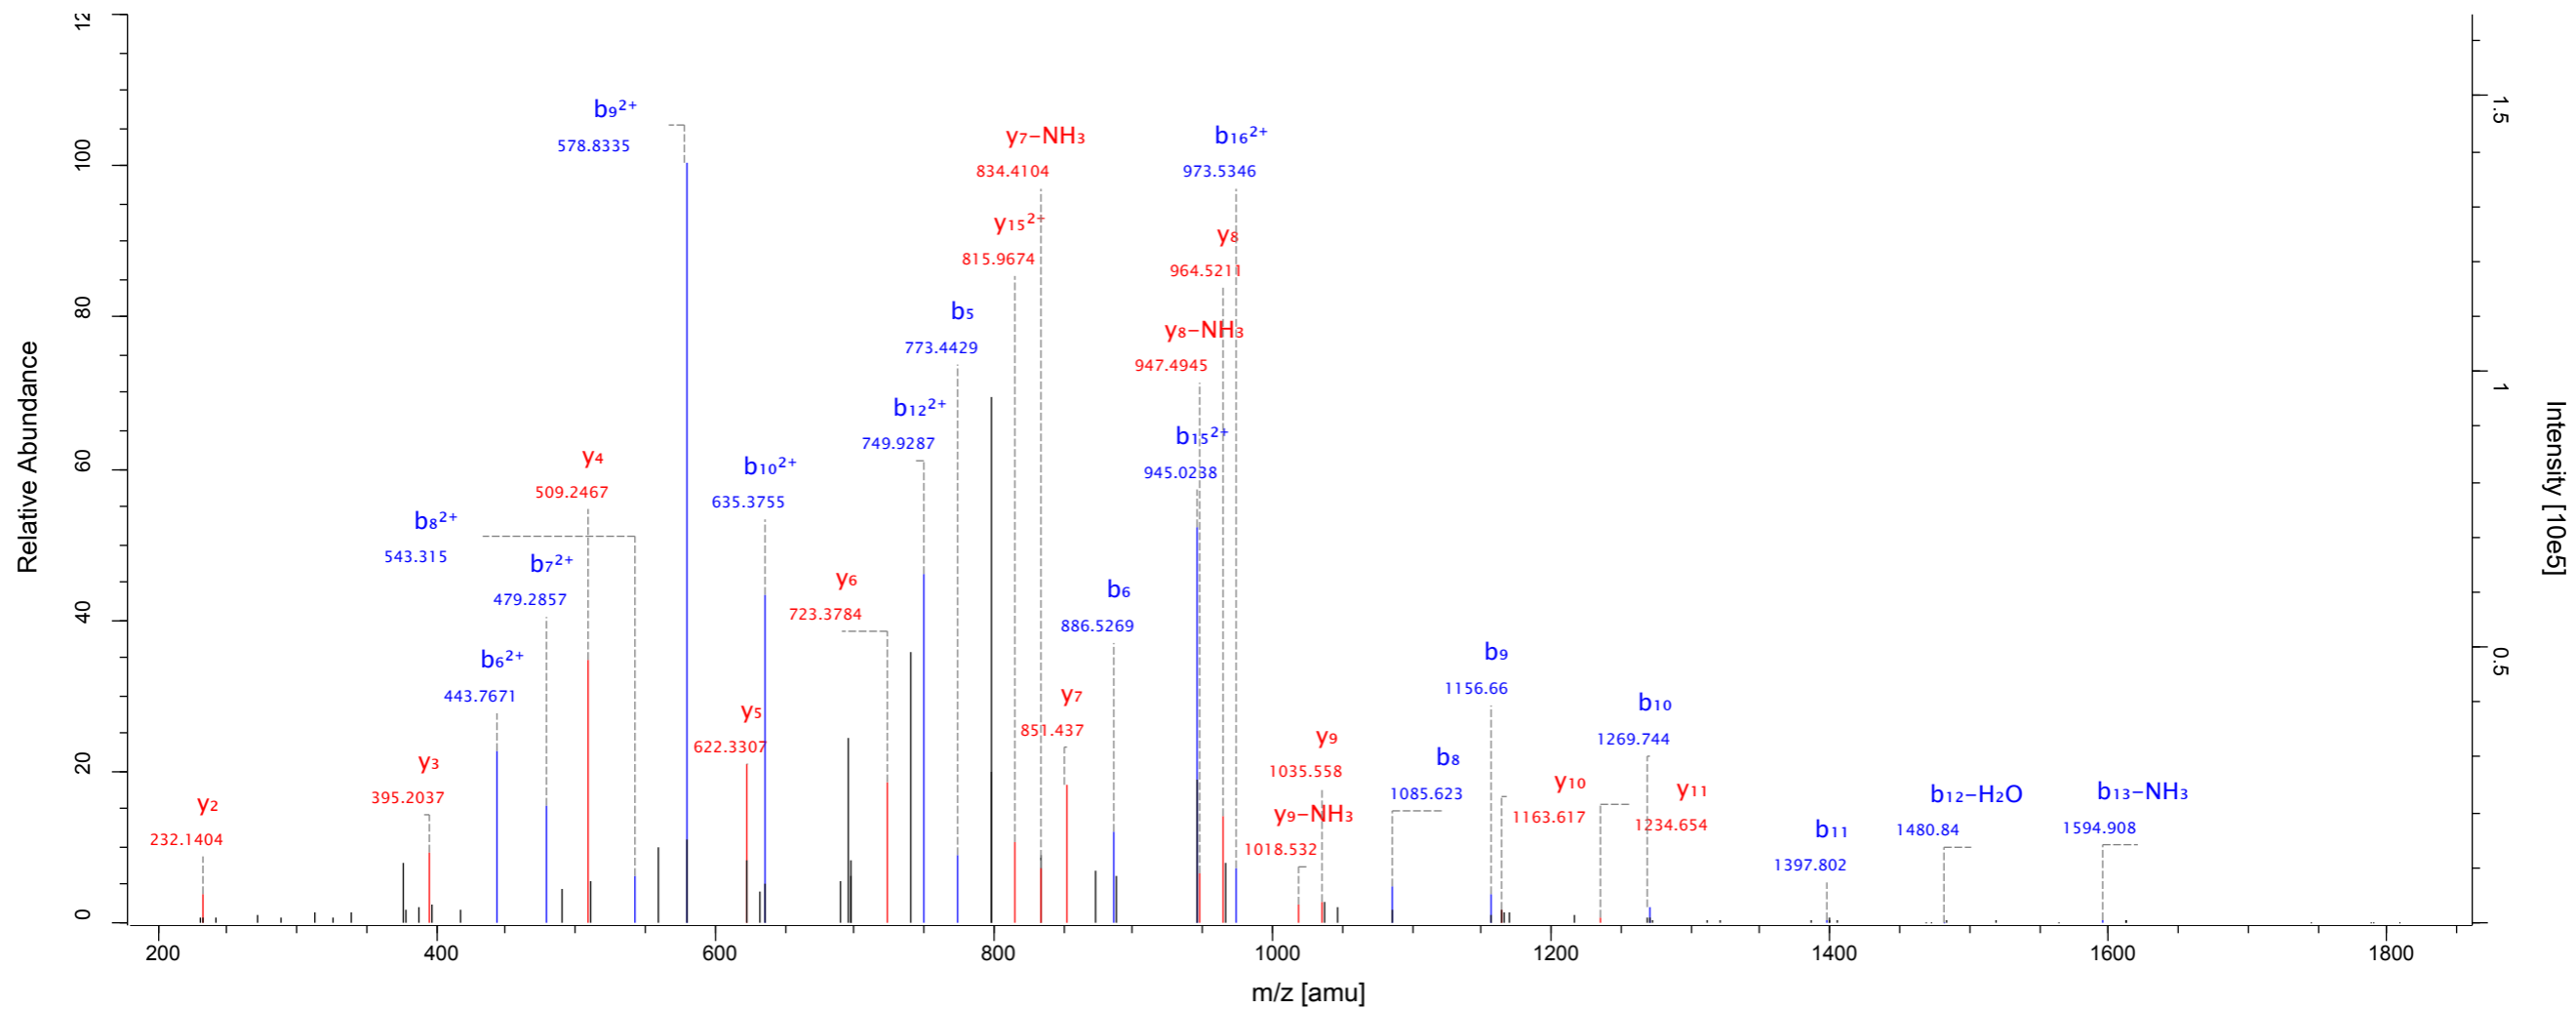



Source: mousePGC-TMT6plex-group1-240ug-205min-3-4  
Scannumber: 32982  
Protein: Tprkb; Tprkb; Tprkb; Tprkb; Q8QZZ7; Q8R2M6; D3Z5E8; D3YXX8  
Peptide Score: 117.93  
Method: ITMS; CID; 1

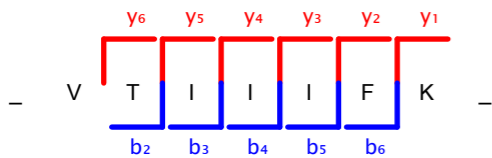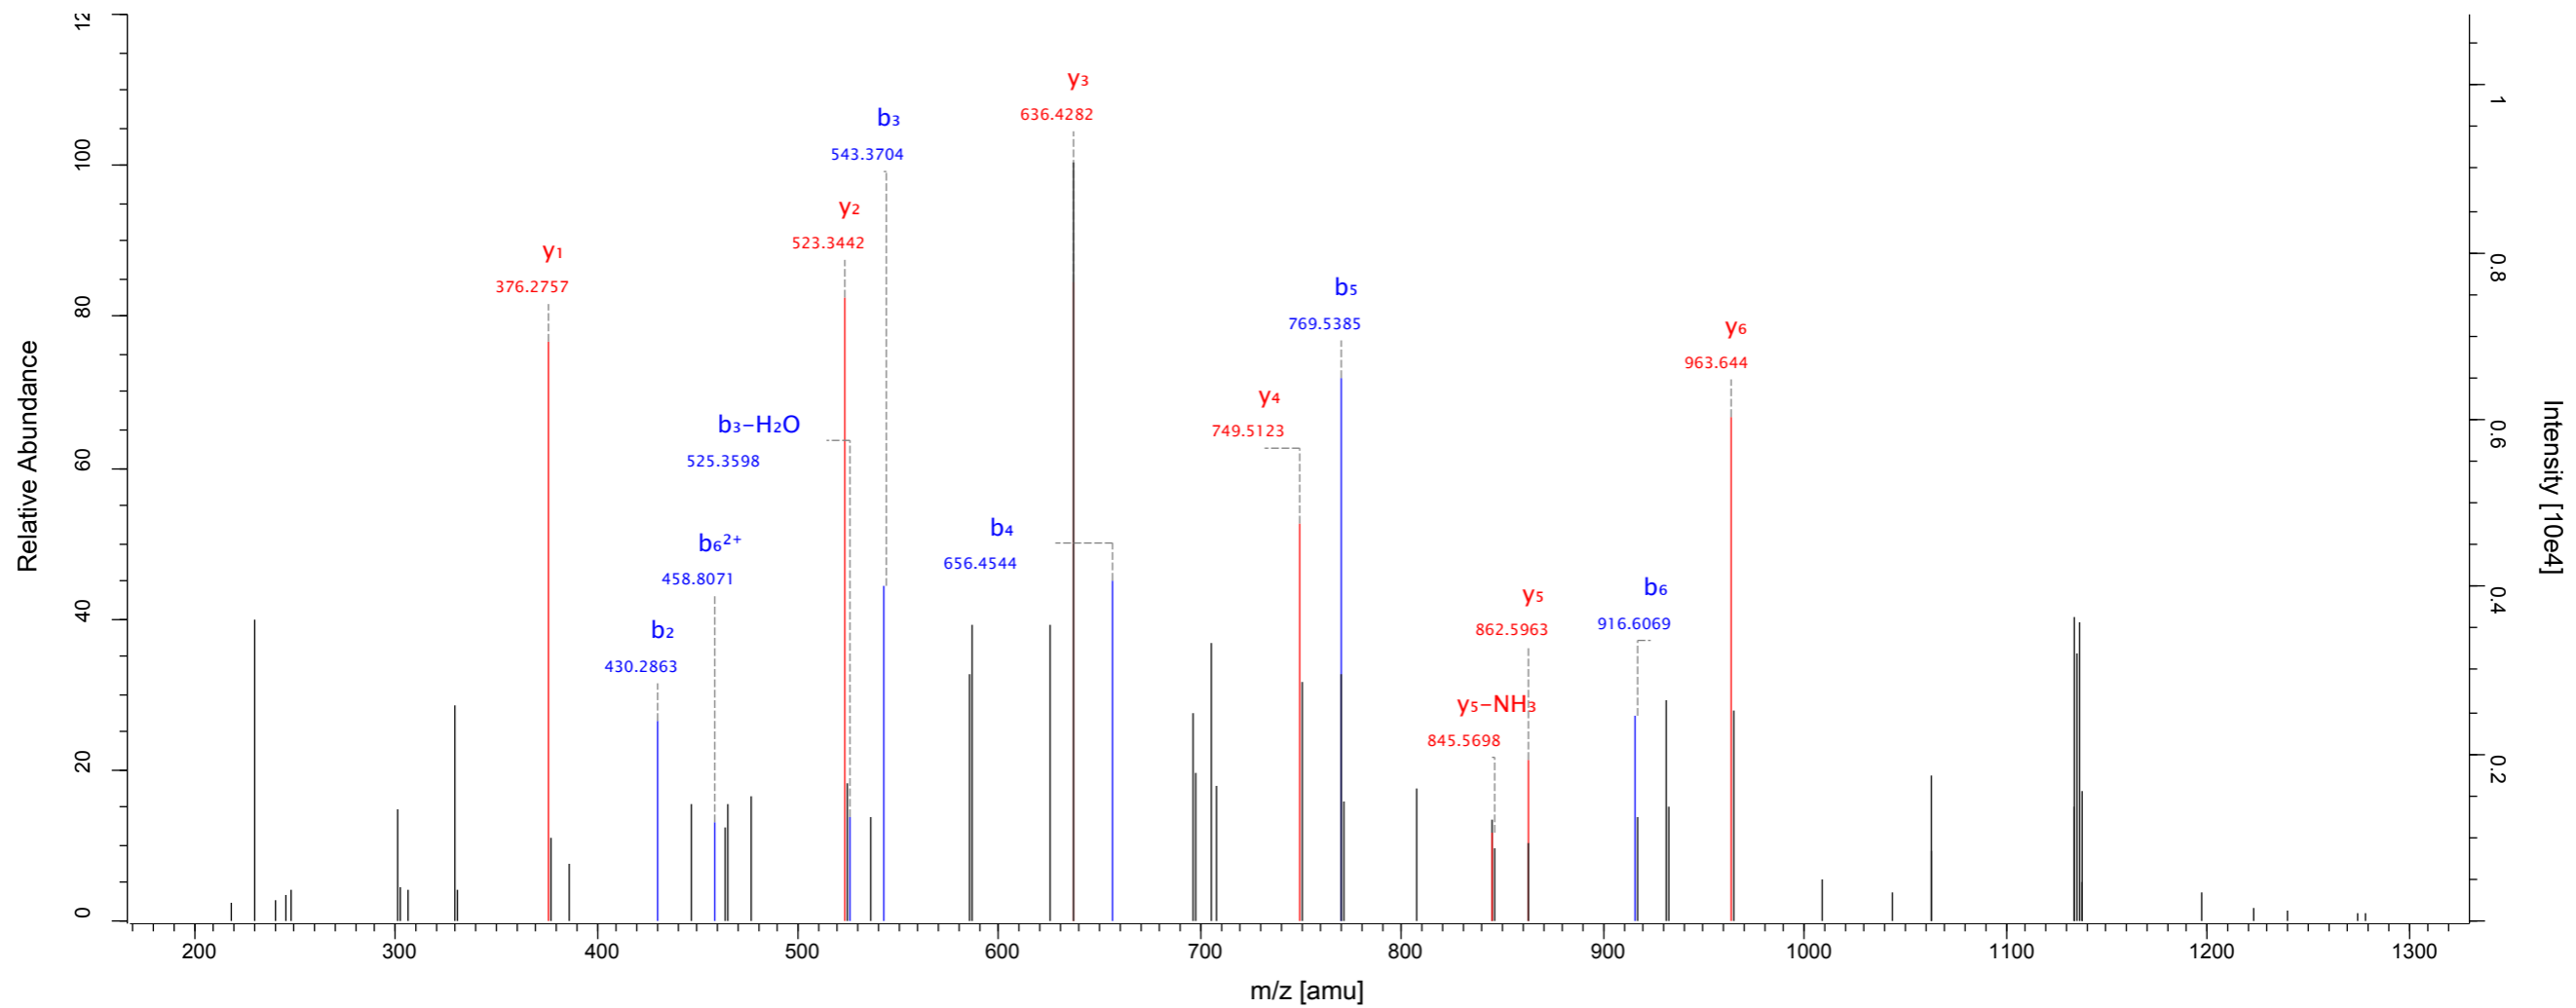

Source: mousePGC-TMT6plex-group1-240ug-205min-9-10  
Scannumber: 19543  
Protein: Mrpl12; Rpl12; Q9DB15  
Peptide Score: 110.39  
Method: ITMS; CID; 1

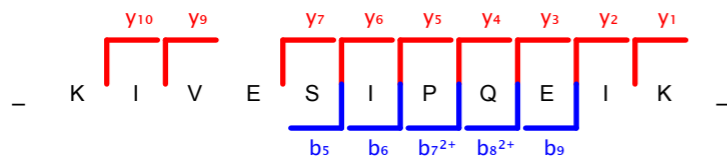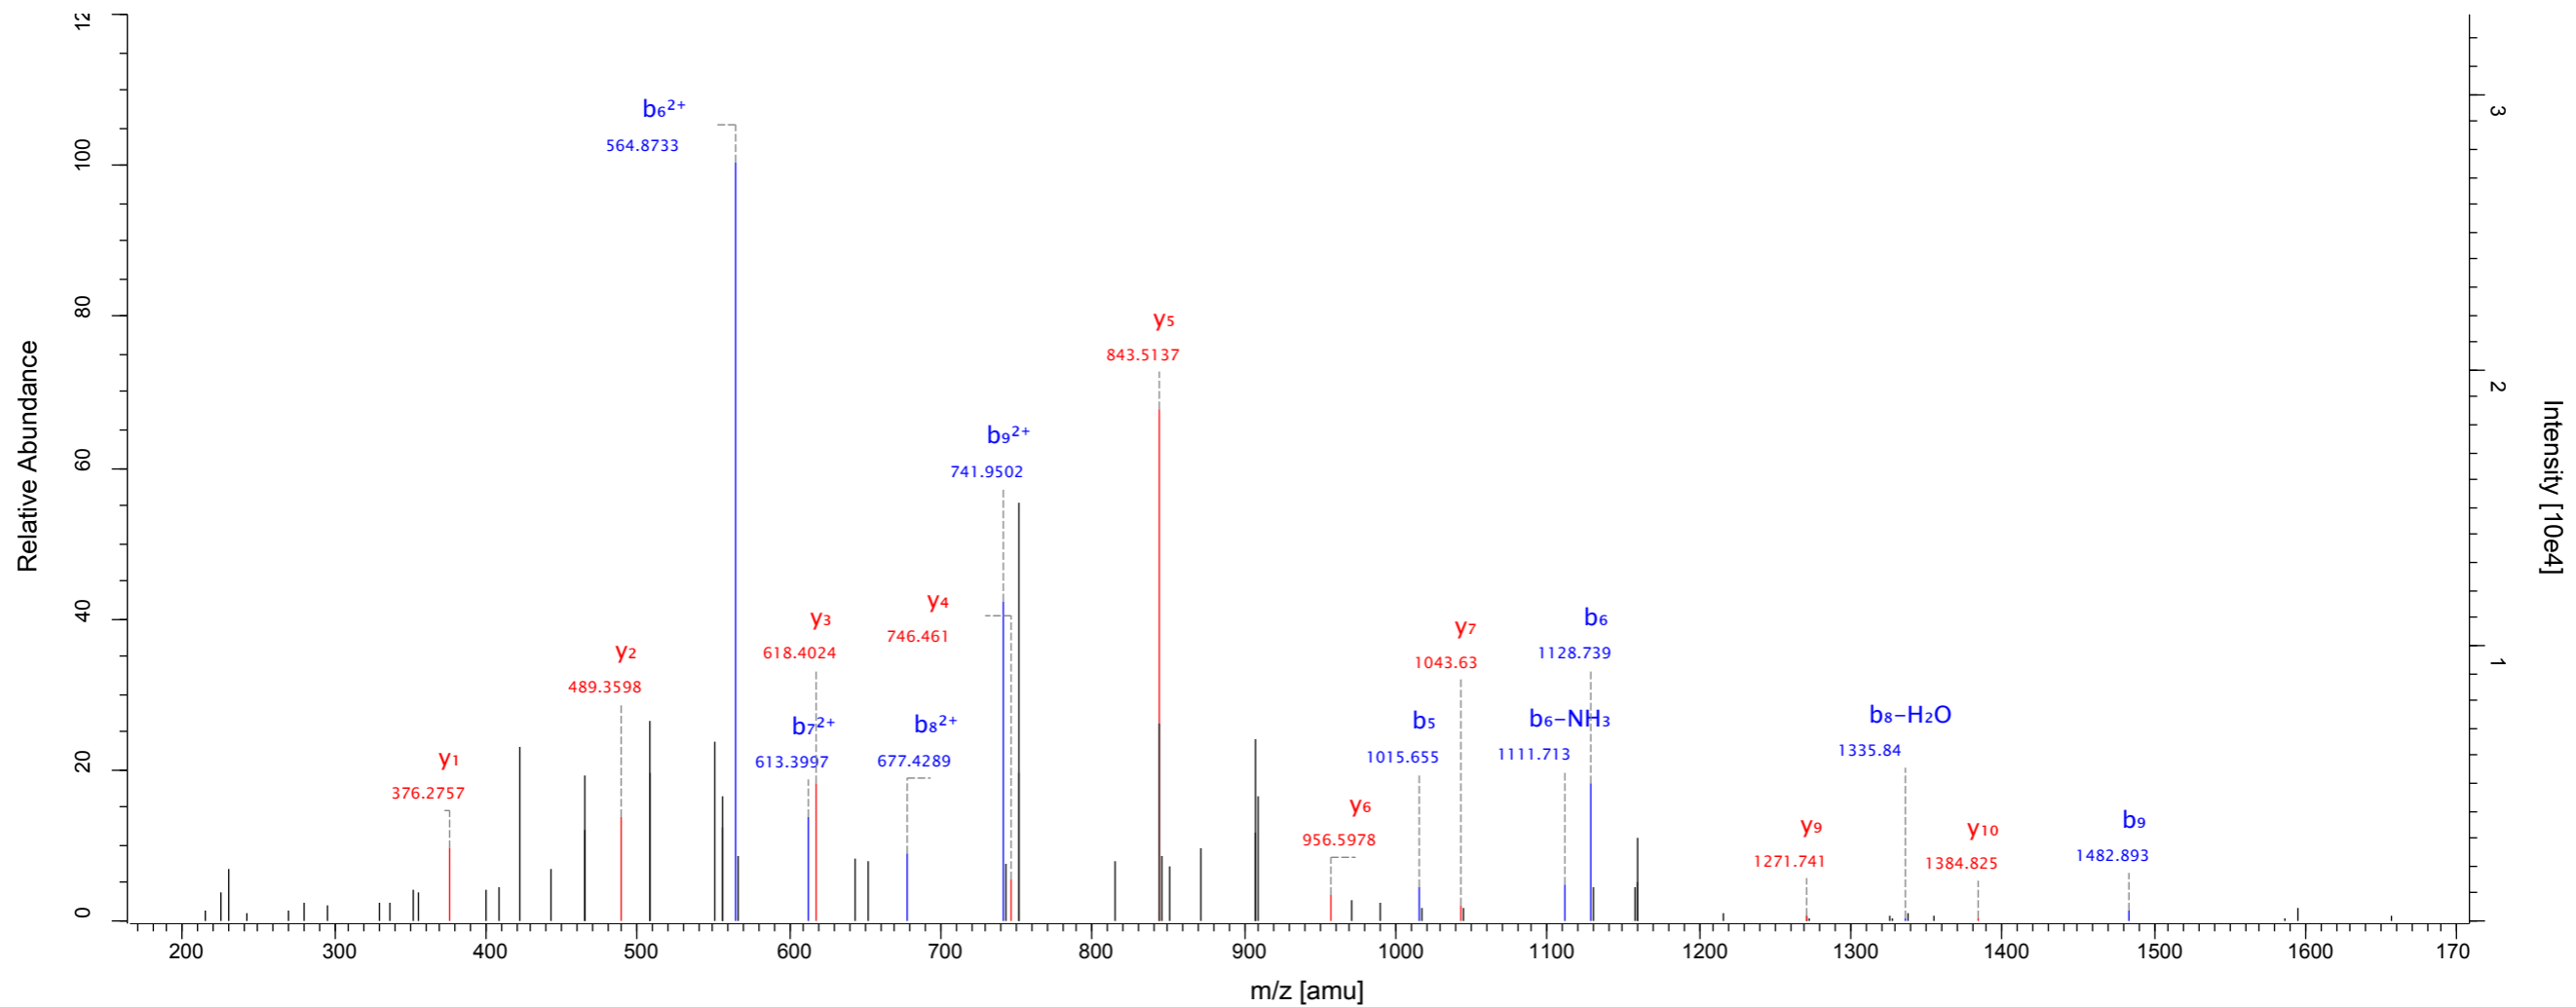

Source: mousePGC-TMT6plex-group1-240ug-205min-9-10  
Scannumber: 29952  
Protein: Cygb; RP23-313J14.4-001; Q9CX80; Q546K1; Q8BN80  
Peptide Score: 151.44  
Method: ITMS; CID; 1

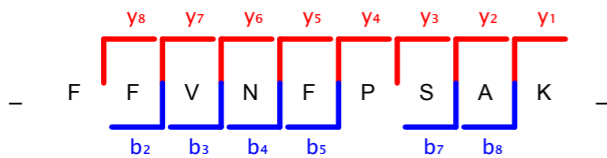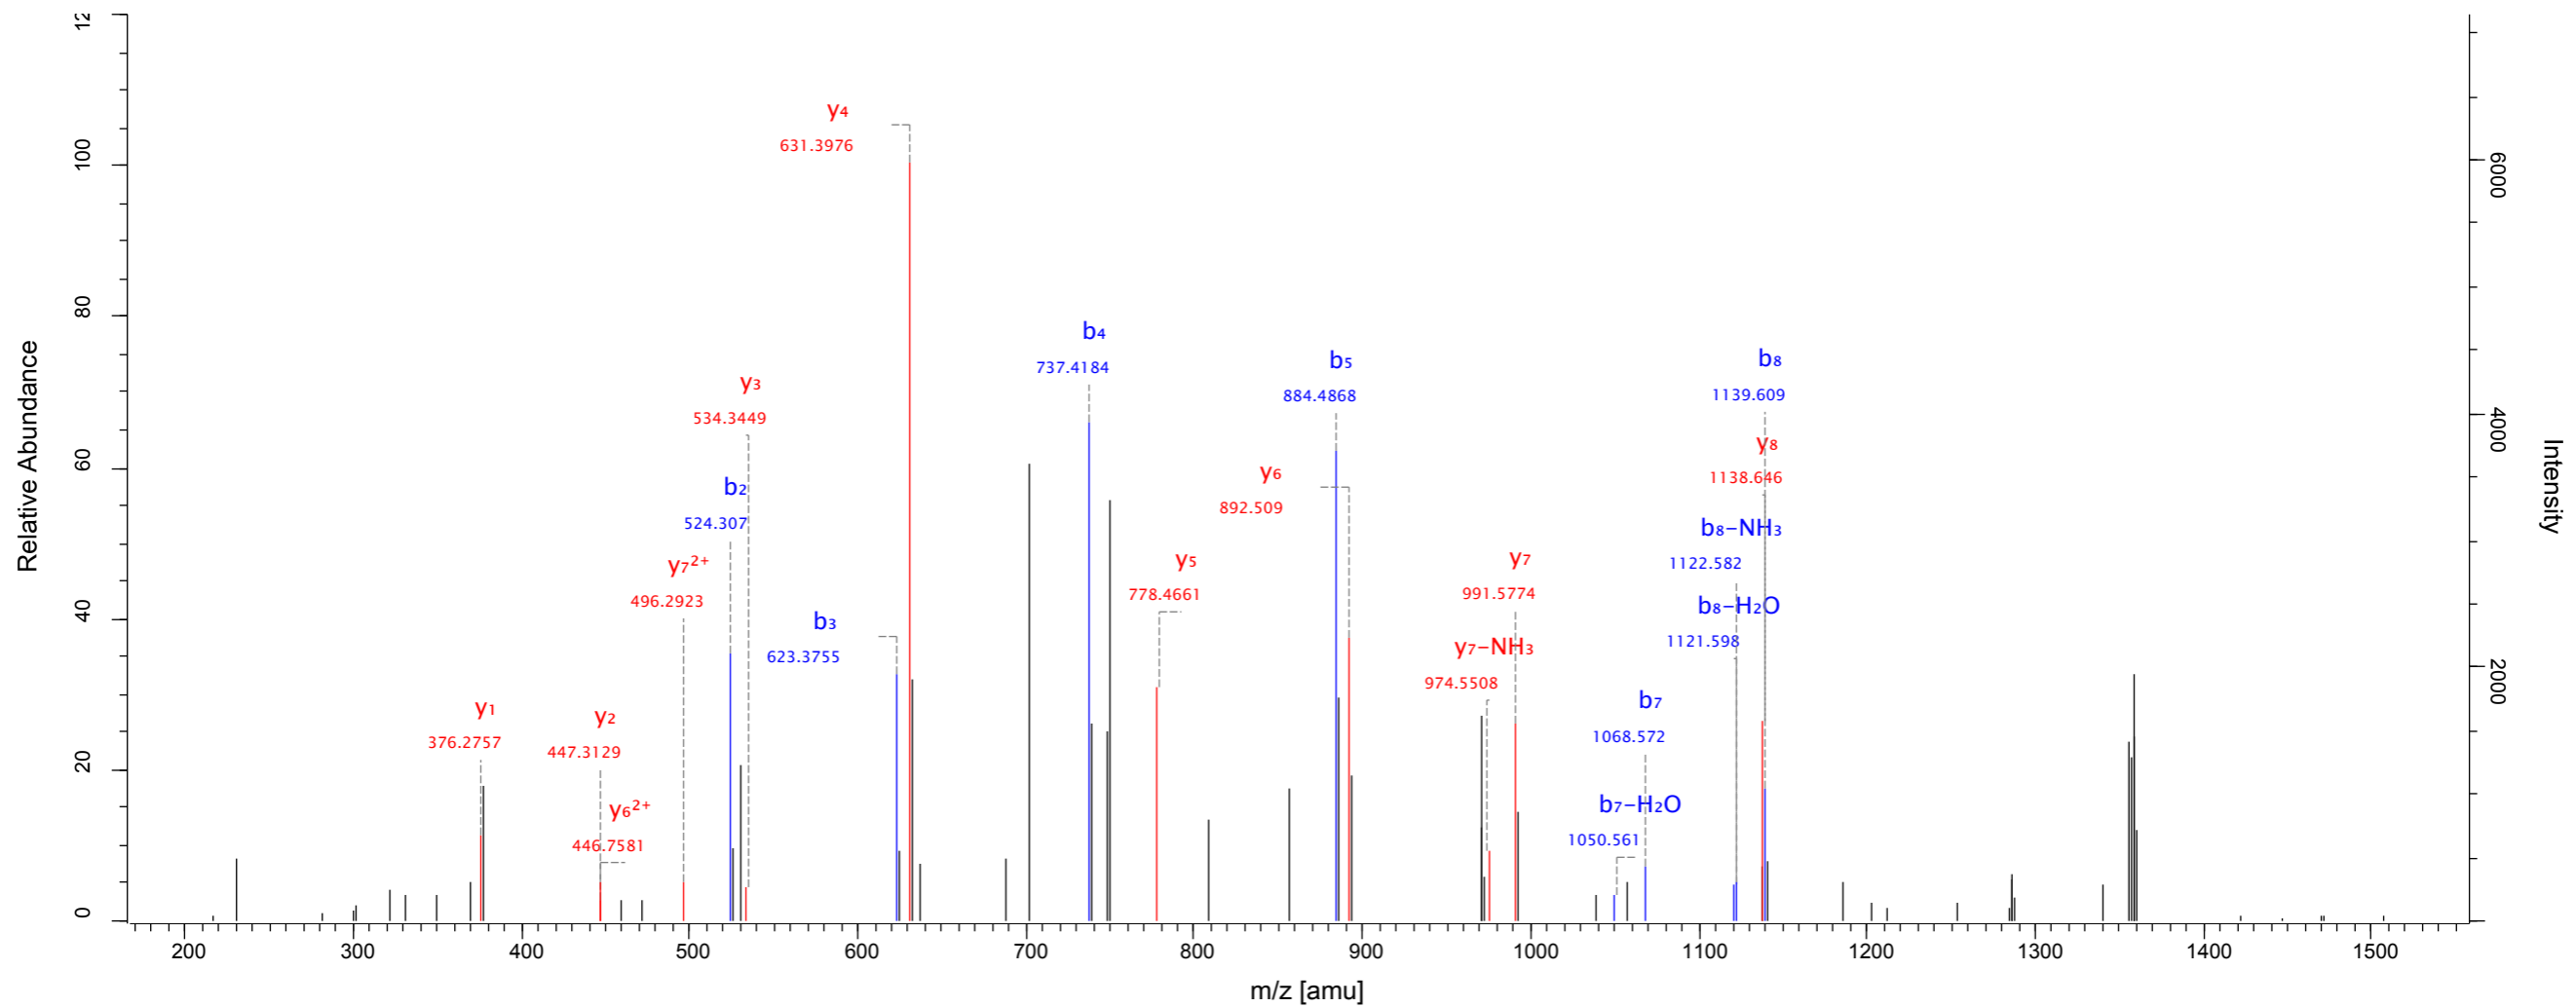

Source: mousePGC-TMT6plex-group1-240ug-205min-9-10  
Scannumber: 31238  
Protein: Ndufa6; Q9CQZ5  
Peptide Score: 141.47  
Method: ITMS; CID; 1

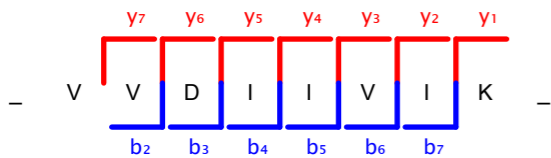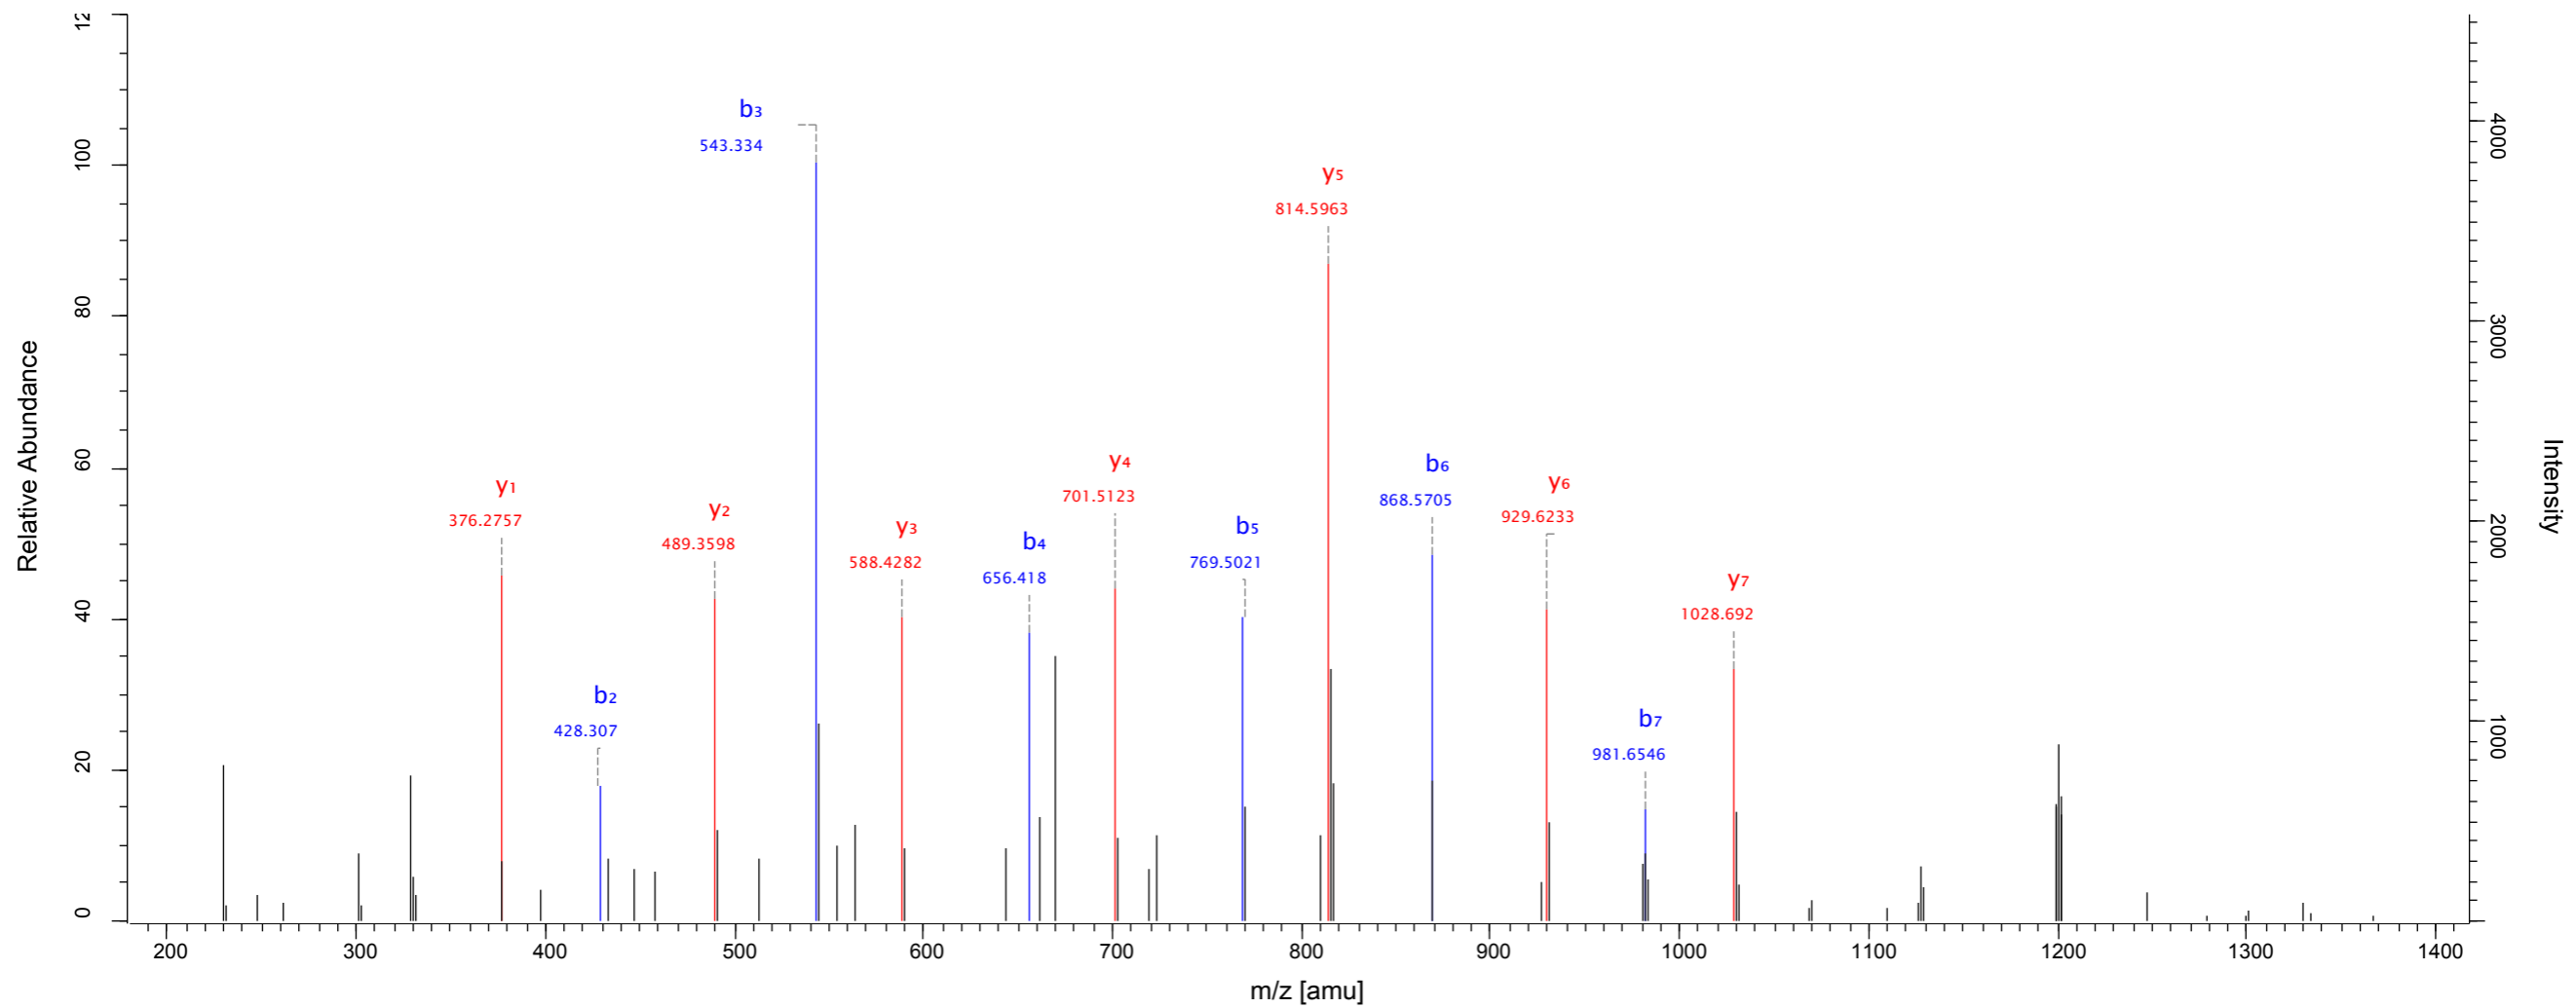

Source: mousePGC-TMT6plex-group1-240ug-205min-15-16

Scannumber: 31681

Protein: Dlg3; Dlg3; mCG\_116782; RP23-142M12.1-003; mKIAA1232; Dlg3; RP23-142M12.1-001; Dlg3; Dlg3; RP23-142M12.1-006; Dlg3; RP23-142M12.1-004; P70175; A2BEF1; Q80TH1; A2BEE9; Q52KF7; A2BEF2

Peptide Score: 210.38

Method: ITMS; CID; 1

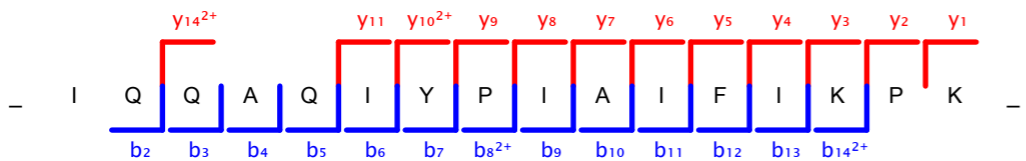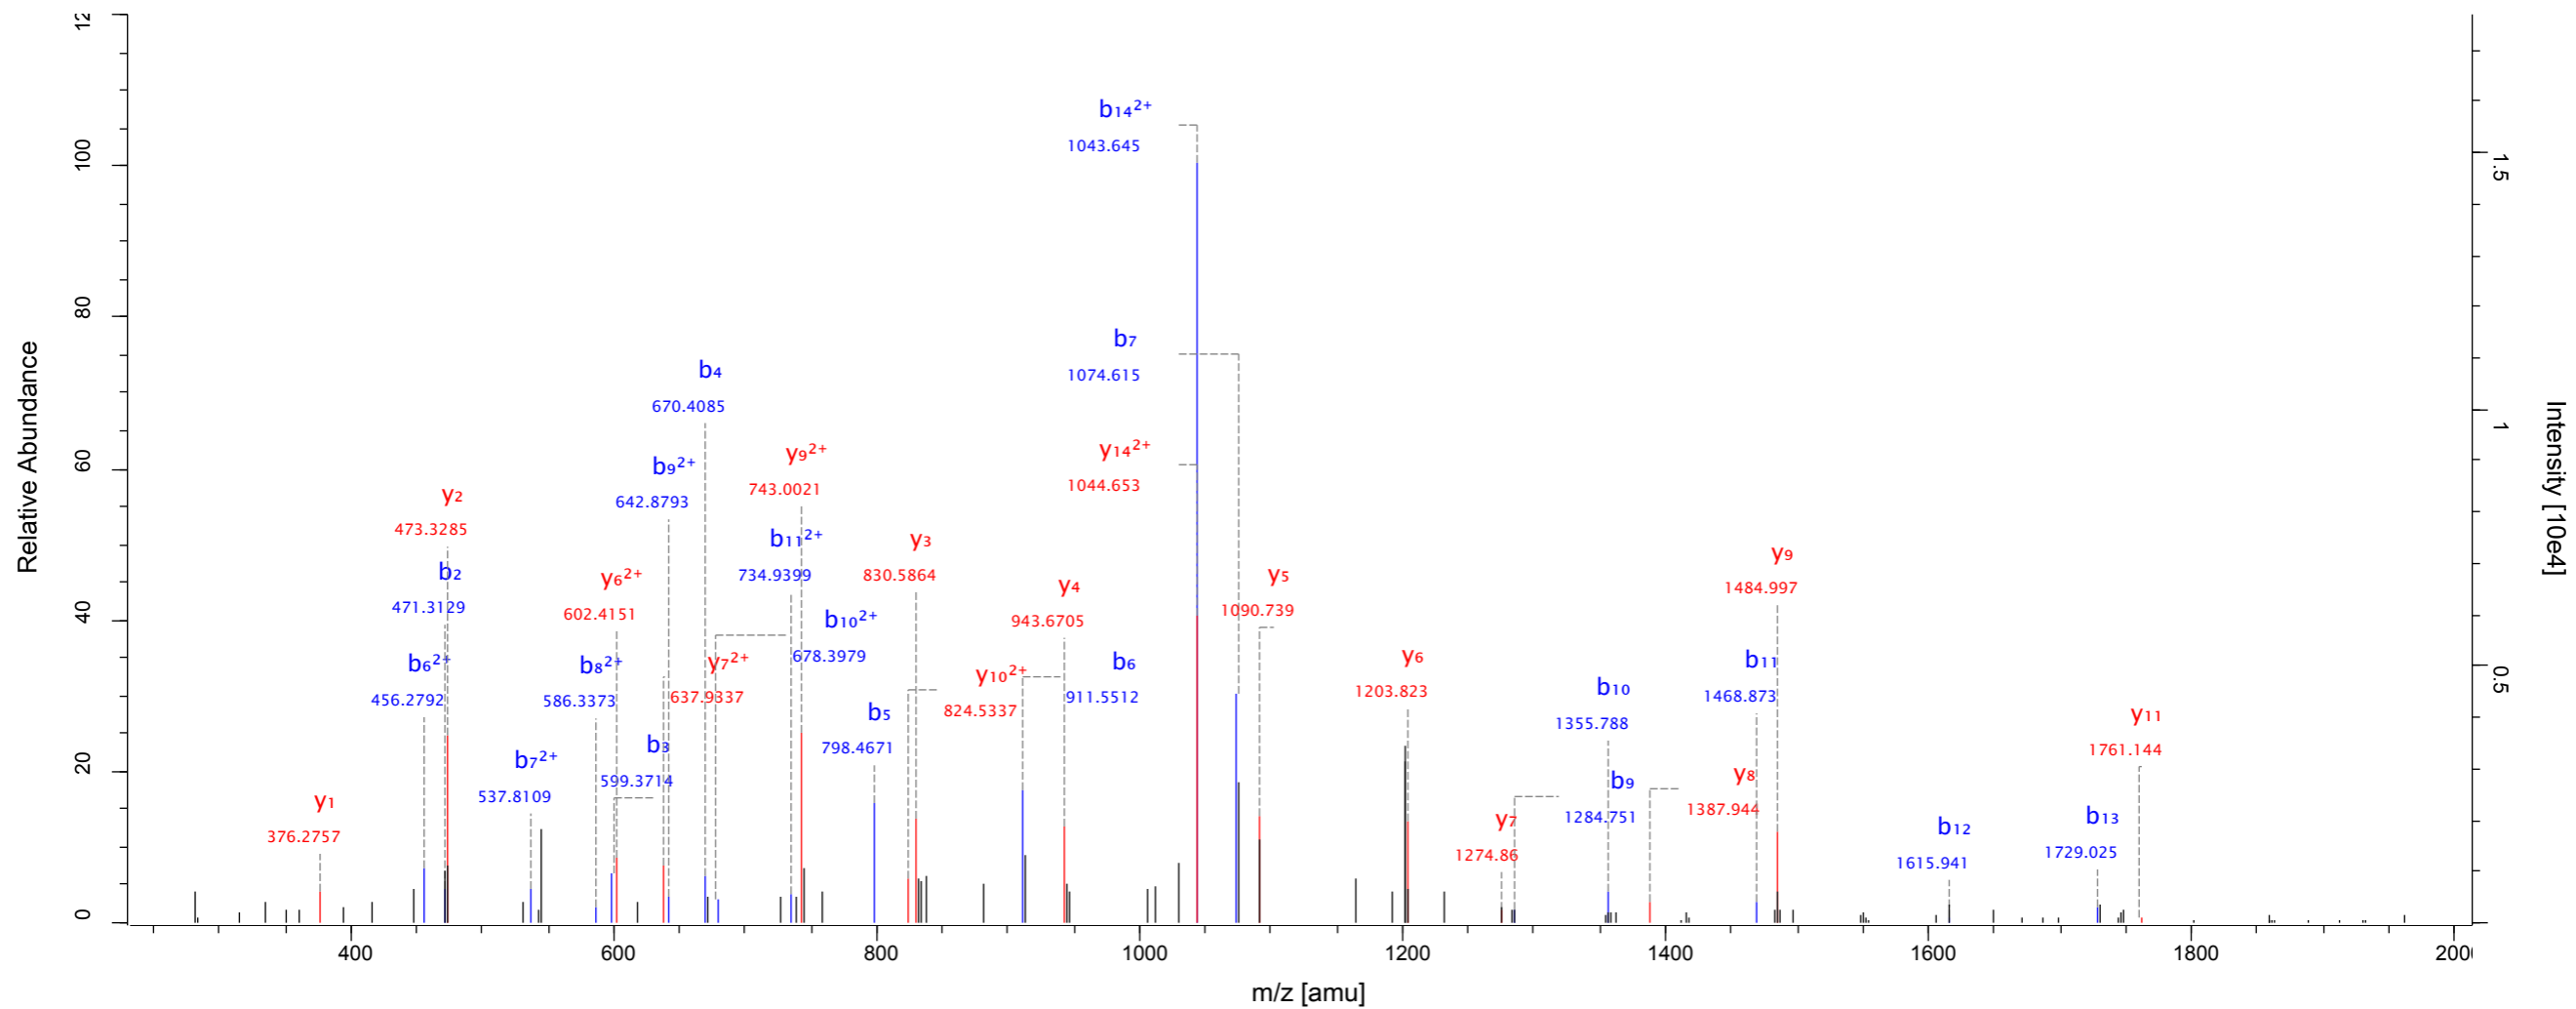

Source: mousePGC-TMT6plex-group1-240ug-205min-17-18  
Scannumber: 16565  
Protein: At3; Serpinc1; AT3; mCG\_9405; P32261; Q543J5  
Peptide Score: 107.57  
Method: ITMS; CID; 1

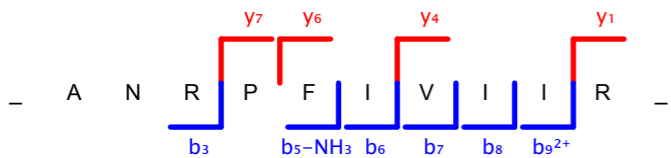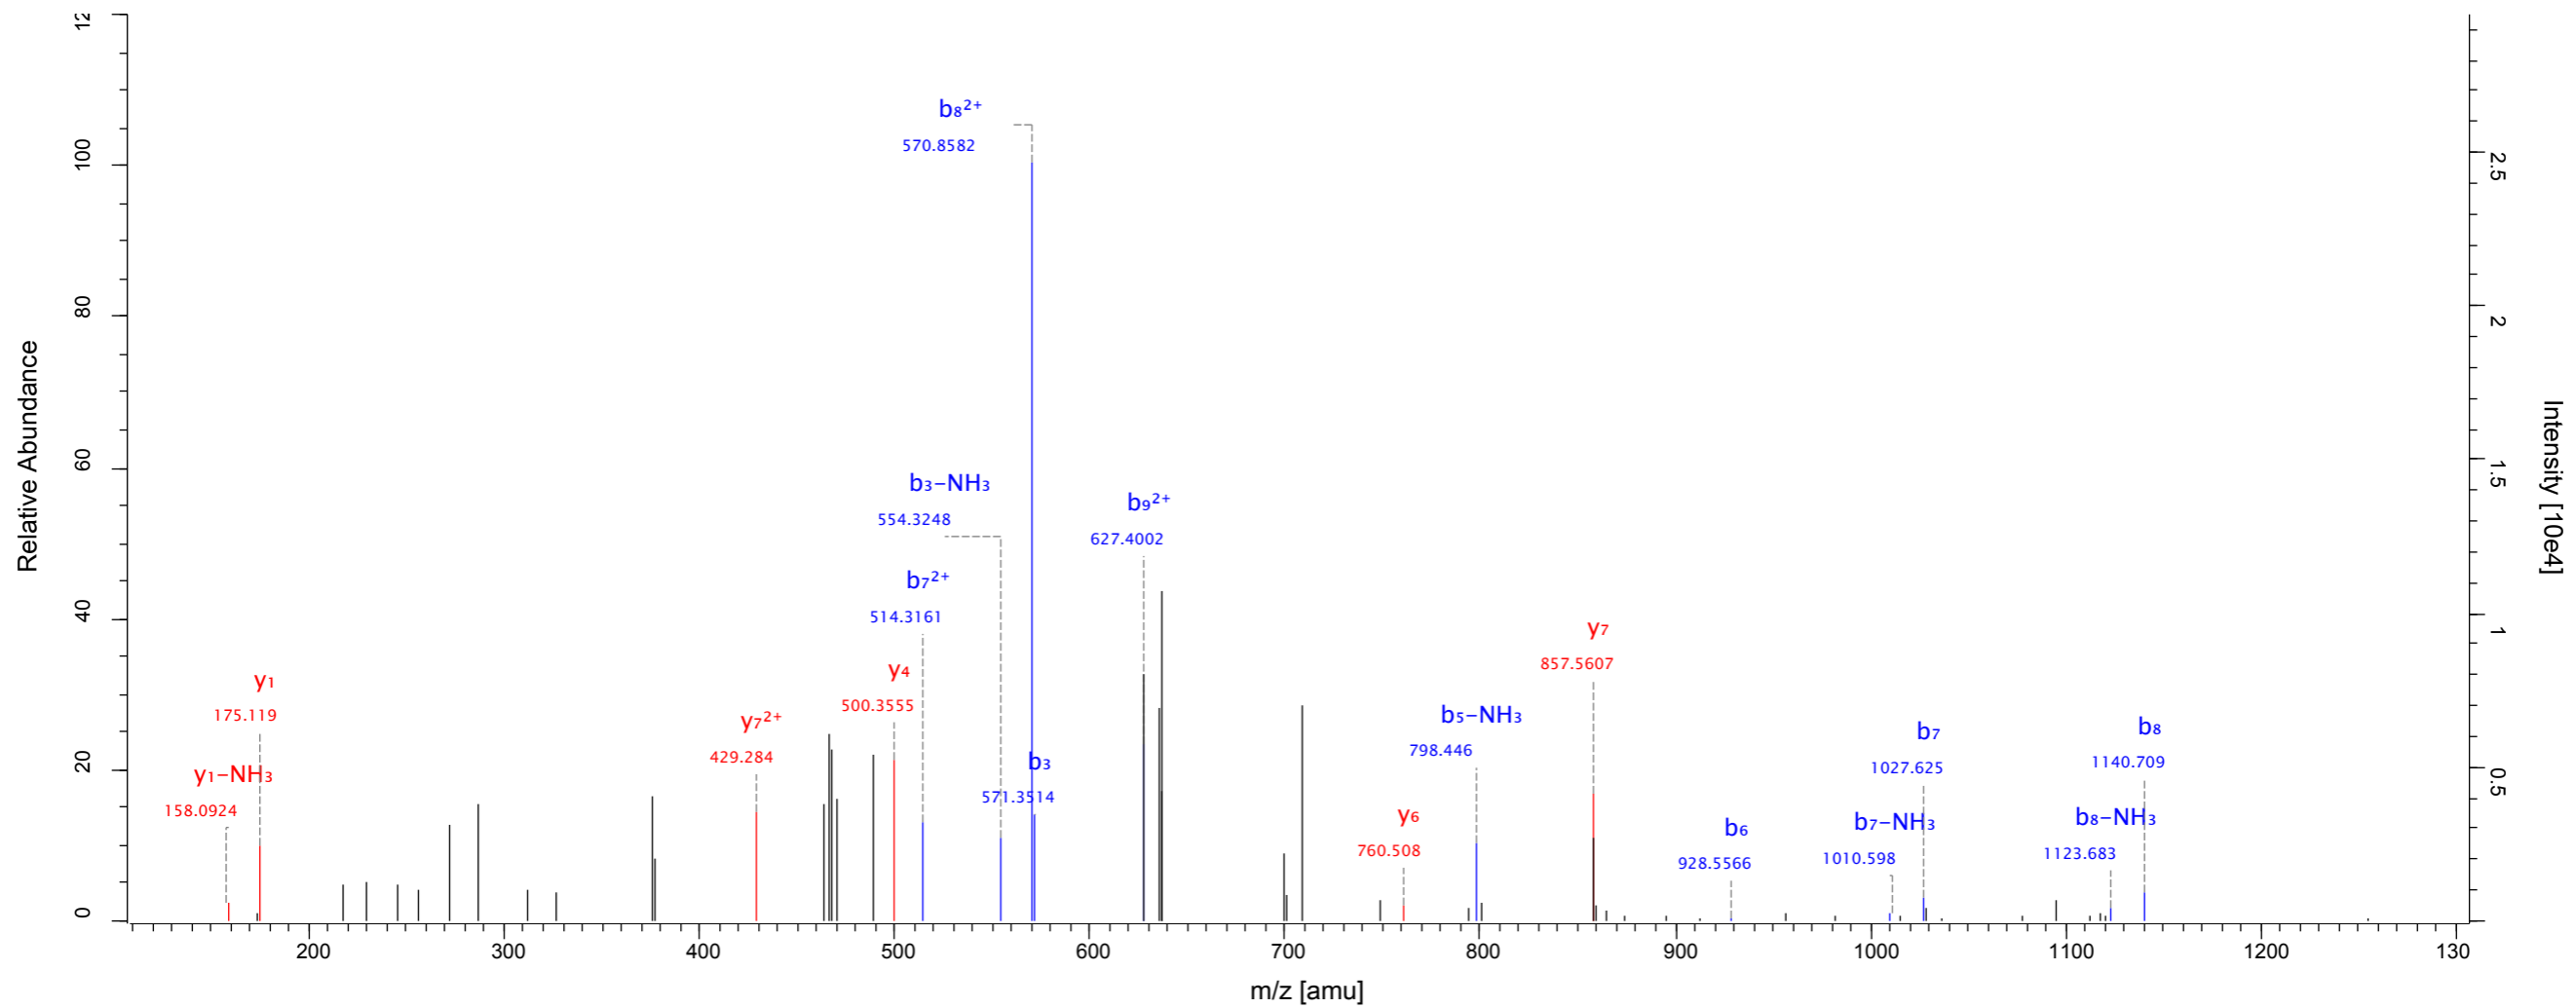

Source: mousePGC-TMT6plex-group1-240ug-205min-17-18  
Scannumber: 28888  
Protein: Dance; Fbln5; Q9WVH9  
Peptide Score: 104.17  
Method: ITMS; CID; 1

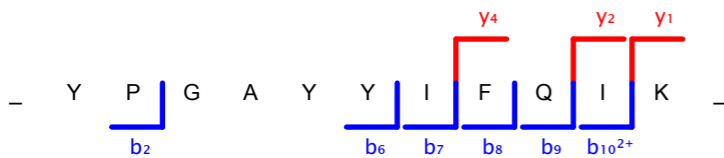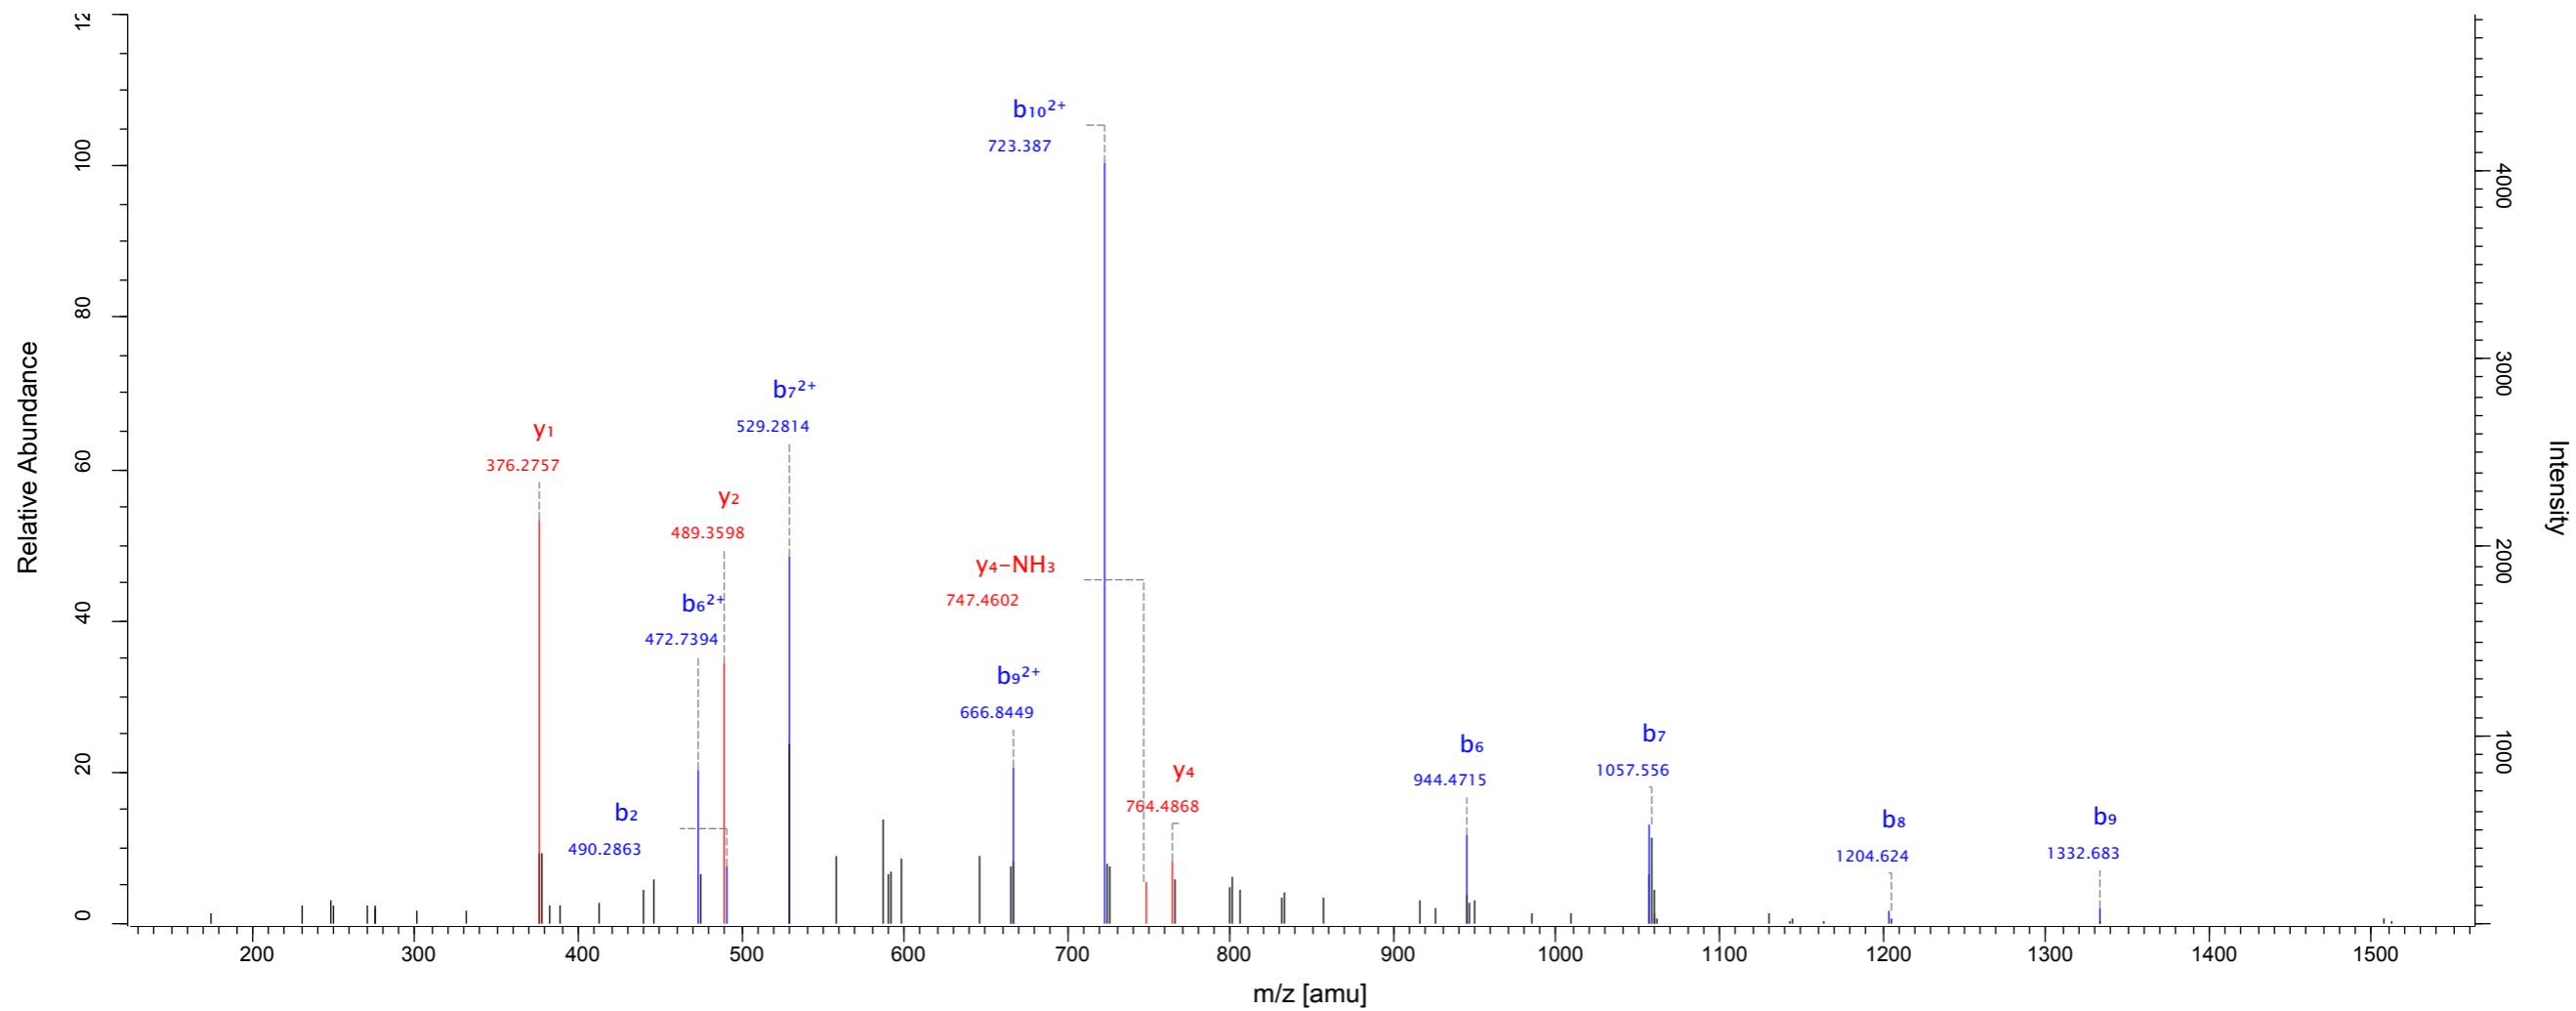

Source: mousePGC-TMT6plex-group1-240ug-205min-19-20  
Scannumber: 21983  
Protein: Cd151; Peta3; O35566; Q921J7  
Peptide Score: 142.43  
Method: ITMS; CID; 1

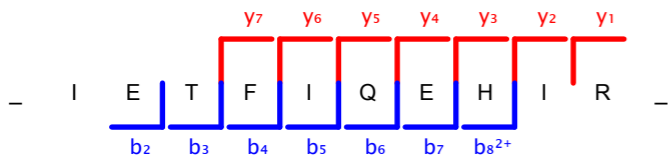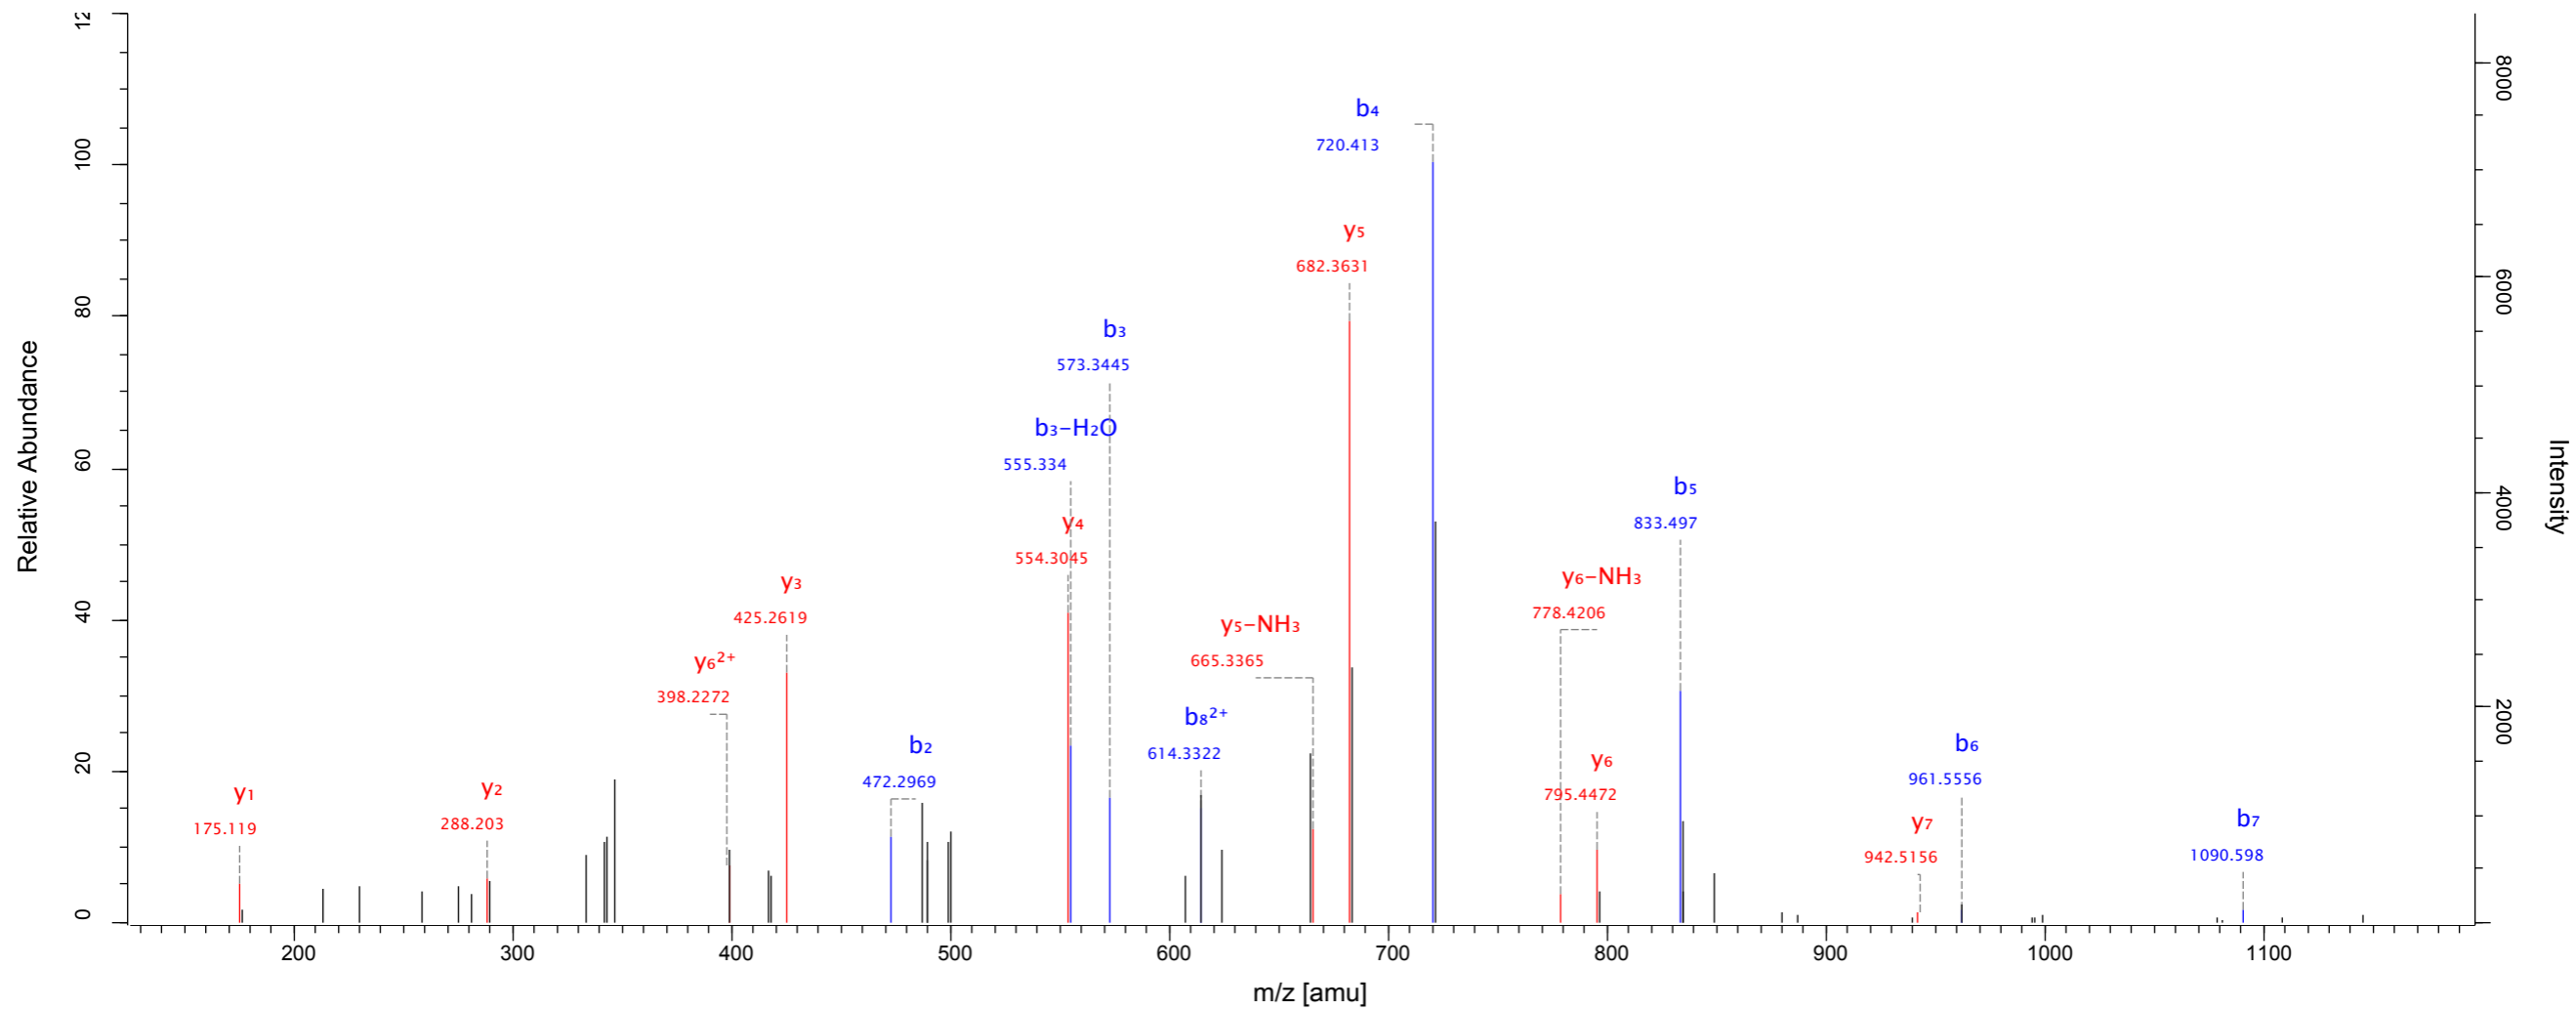



Source: mousePGC-TMT6plex-group1-240ug-205min-21-22  
Scannumber: 18258  
Protein: Mterfd1; Q8R3J4  
Peptide Score: 121.62  
Method: ITMS; CID; 1

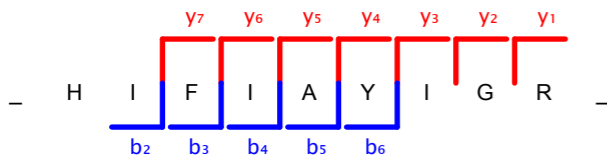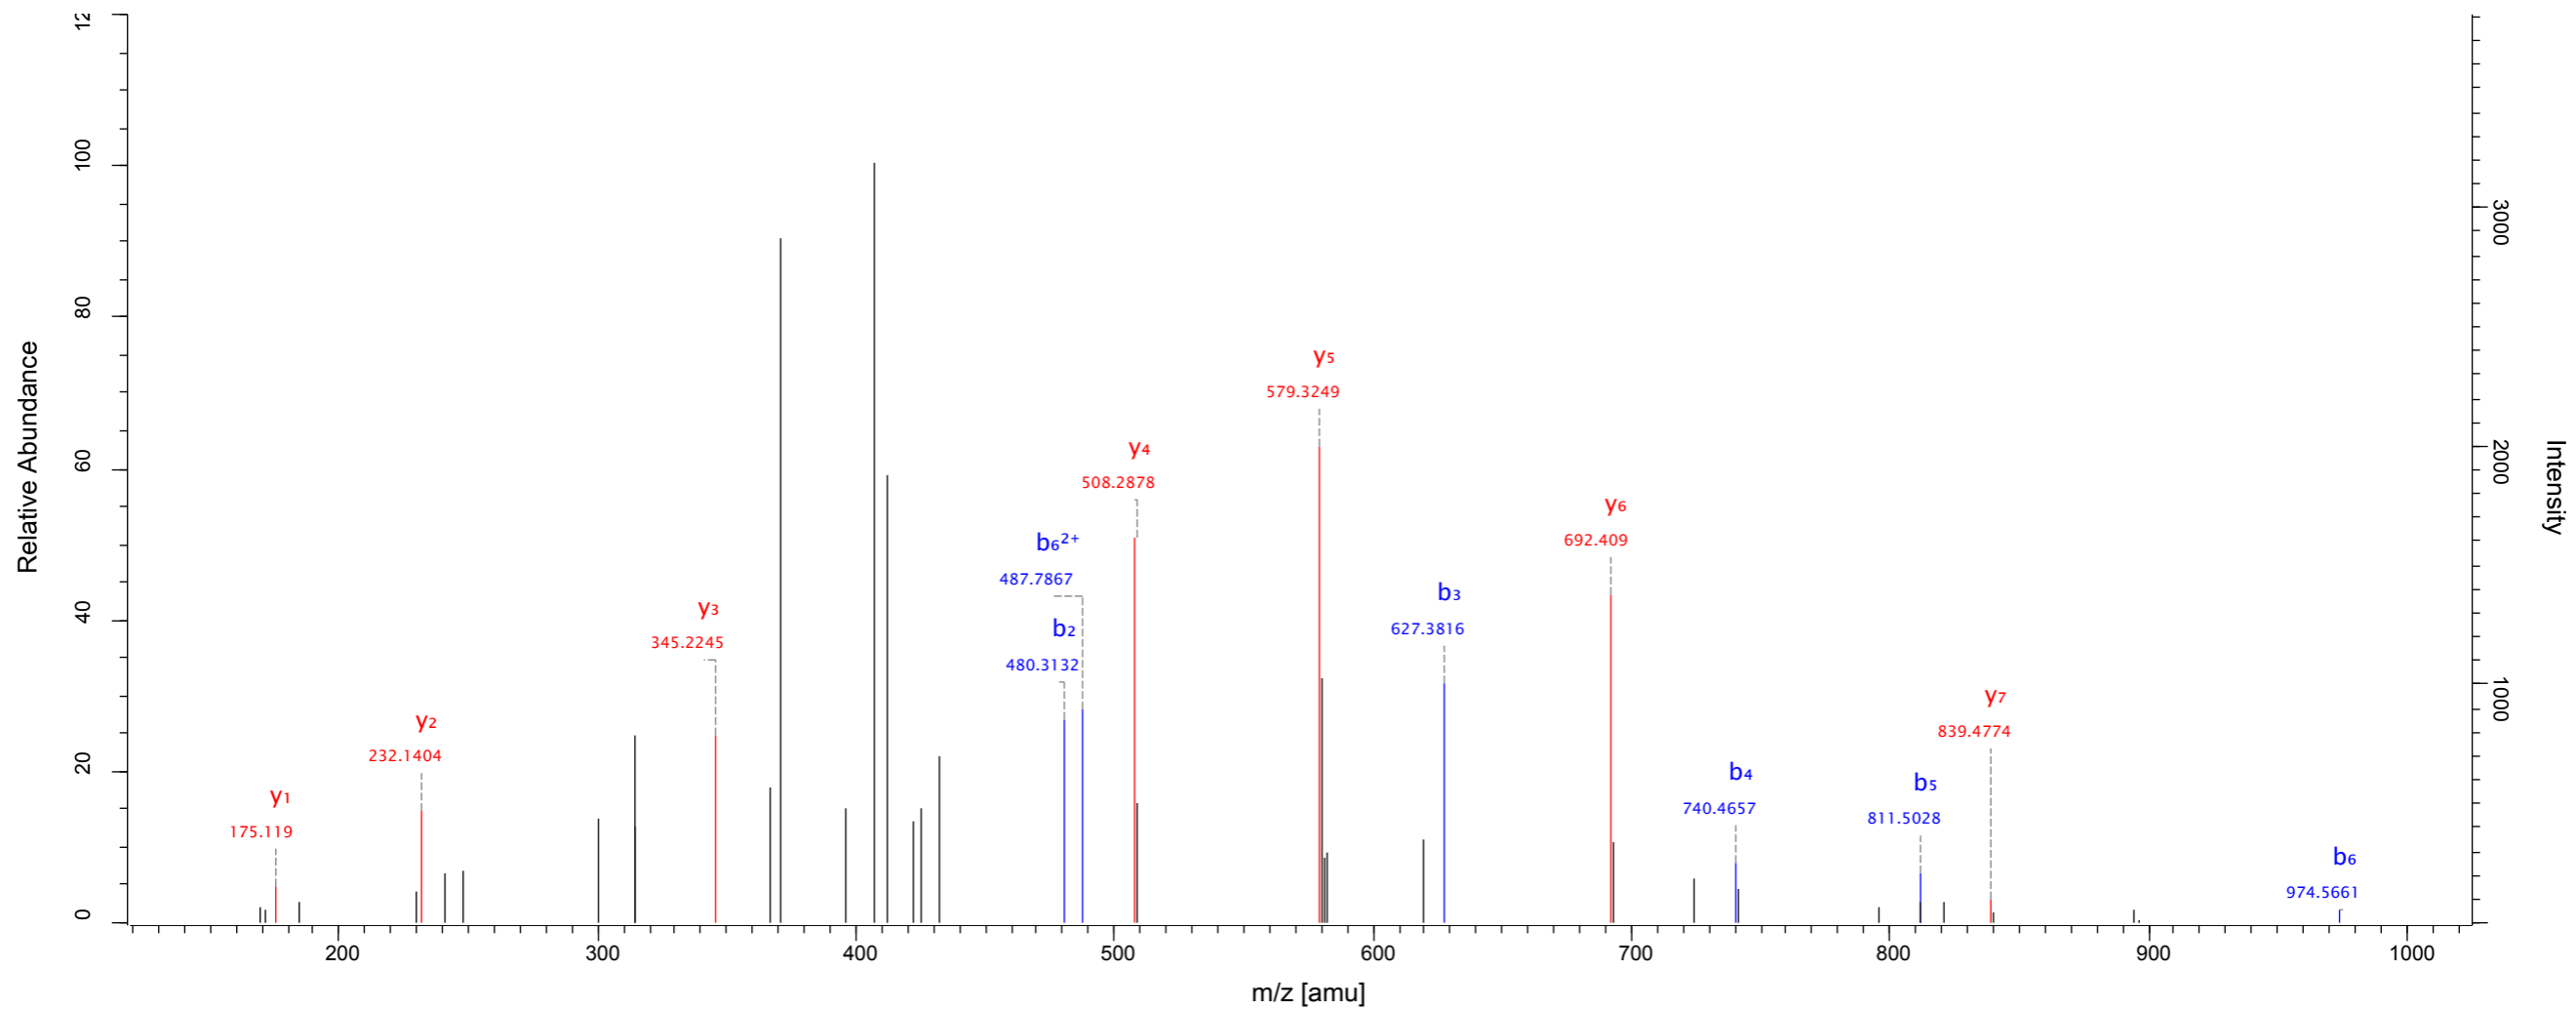

Source: mousePGC-TMT6plex-group1-240ug-205min-21-22  
Scannumber: 29731  
Protein: Gnn; Nt5dc3; BC030307; Q3UHB1; Q692V2  
Peptide Score: 147.33  
Method: ITMS; CID; 1

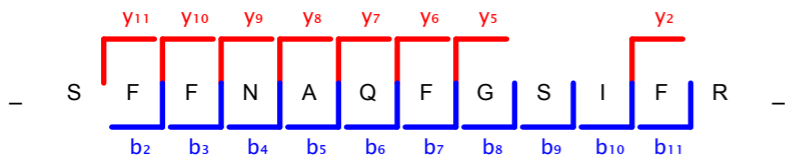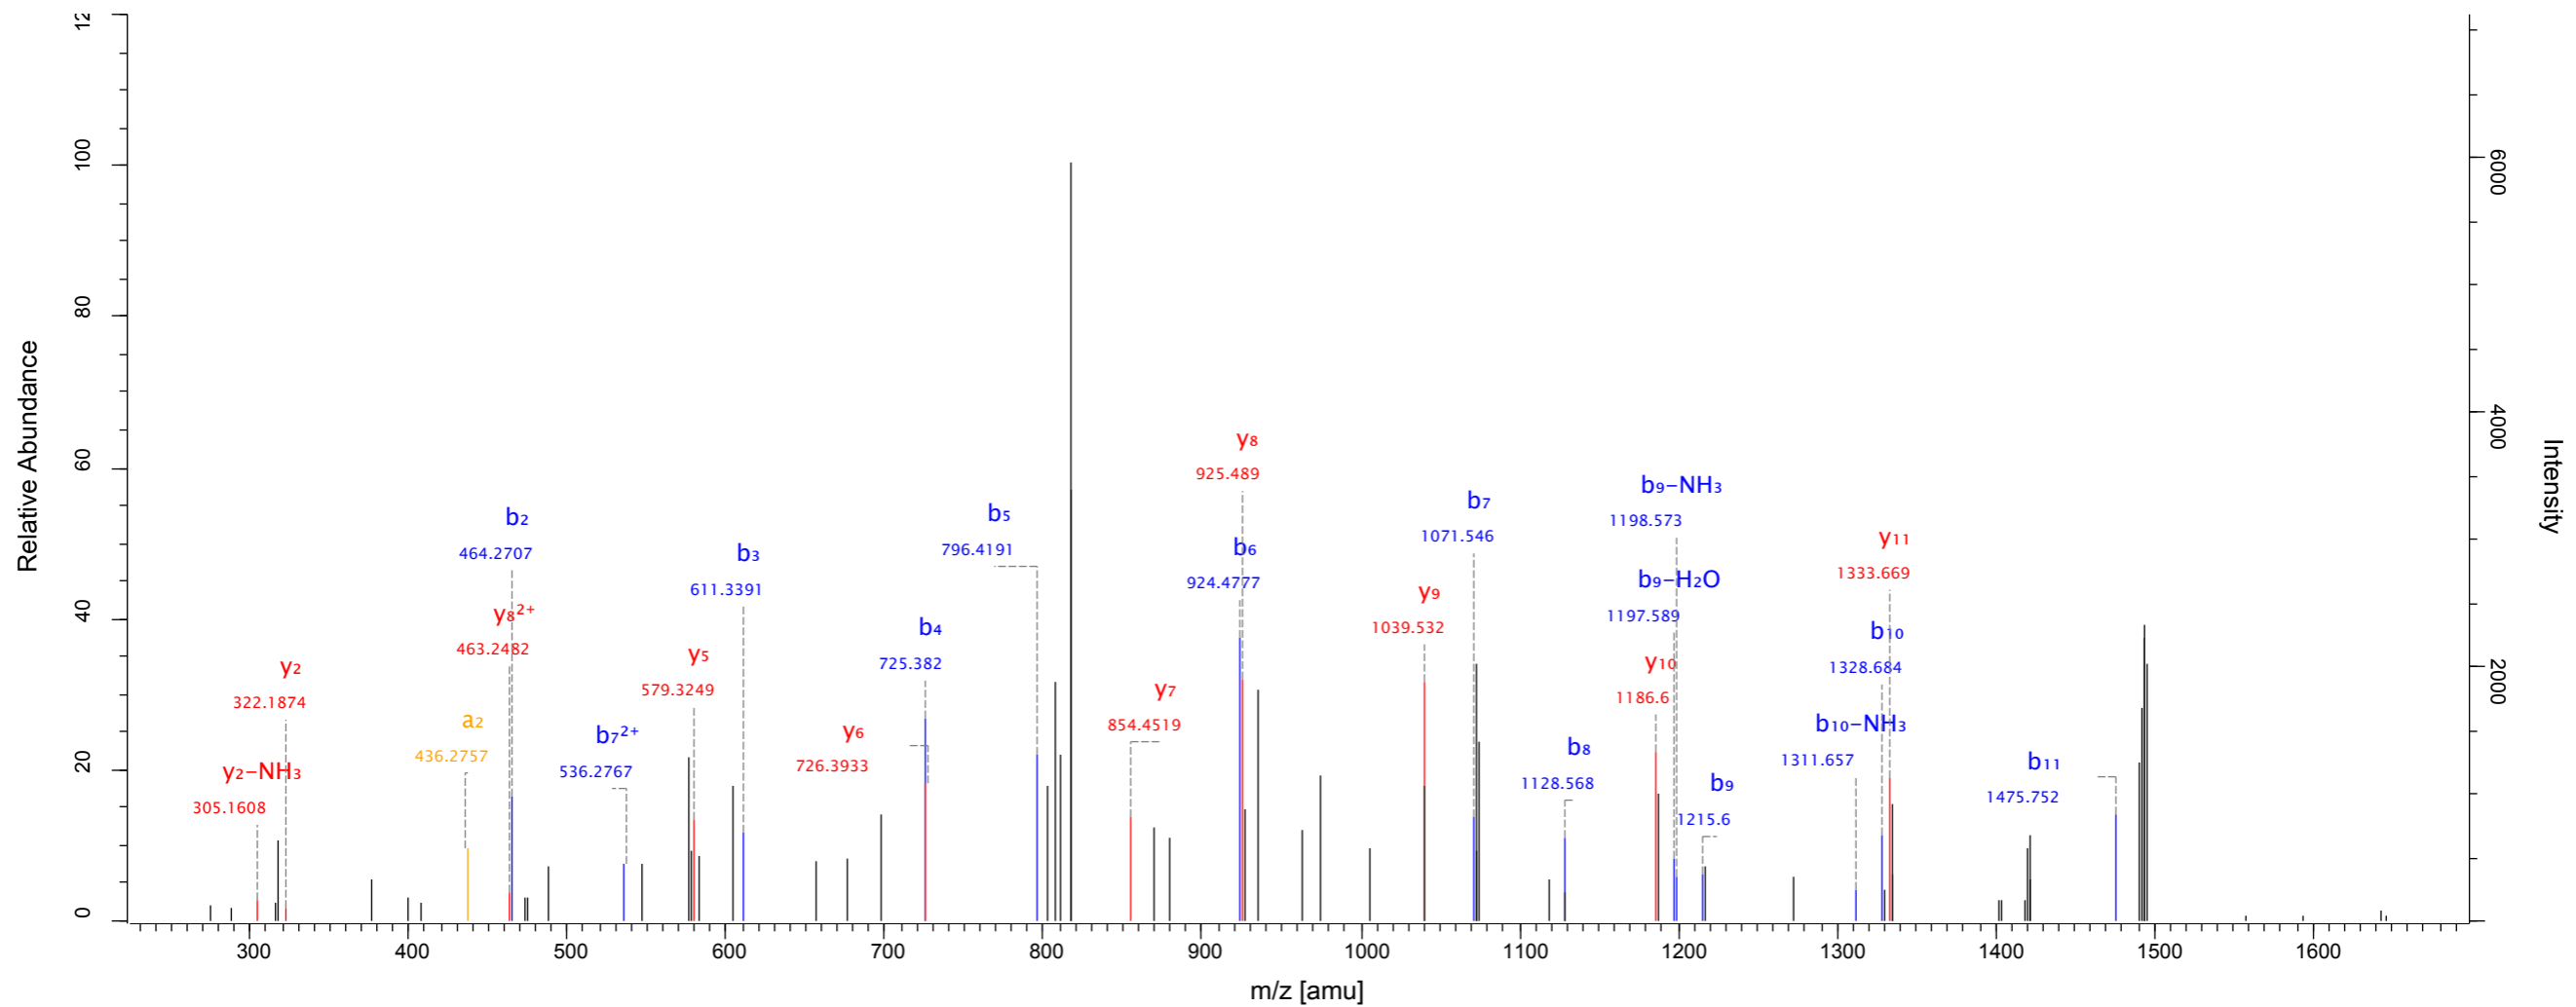

Source: mousePGC-TMT6plex-group1-240ug-205min-21-22  
Scannumber: 33152  
Protein: Mlycd; Mlycd; Mlycd; Q99J39-1; Q99J39; Q99J39-2; Q99J39; Q569V6  
Peptide Score: 157.66  
Method: ITMS; CID; 1

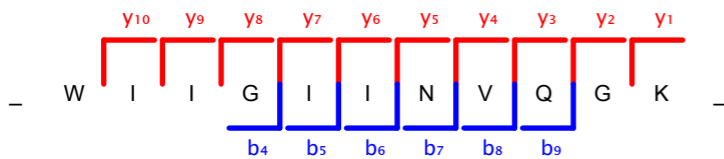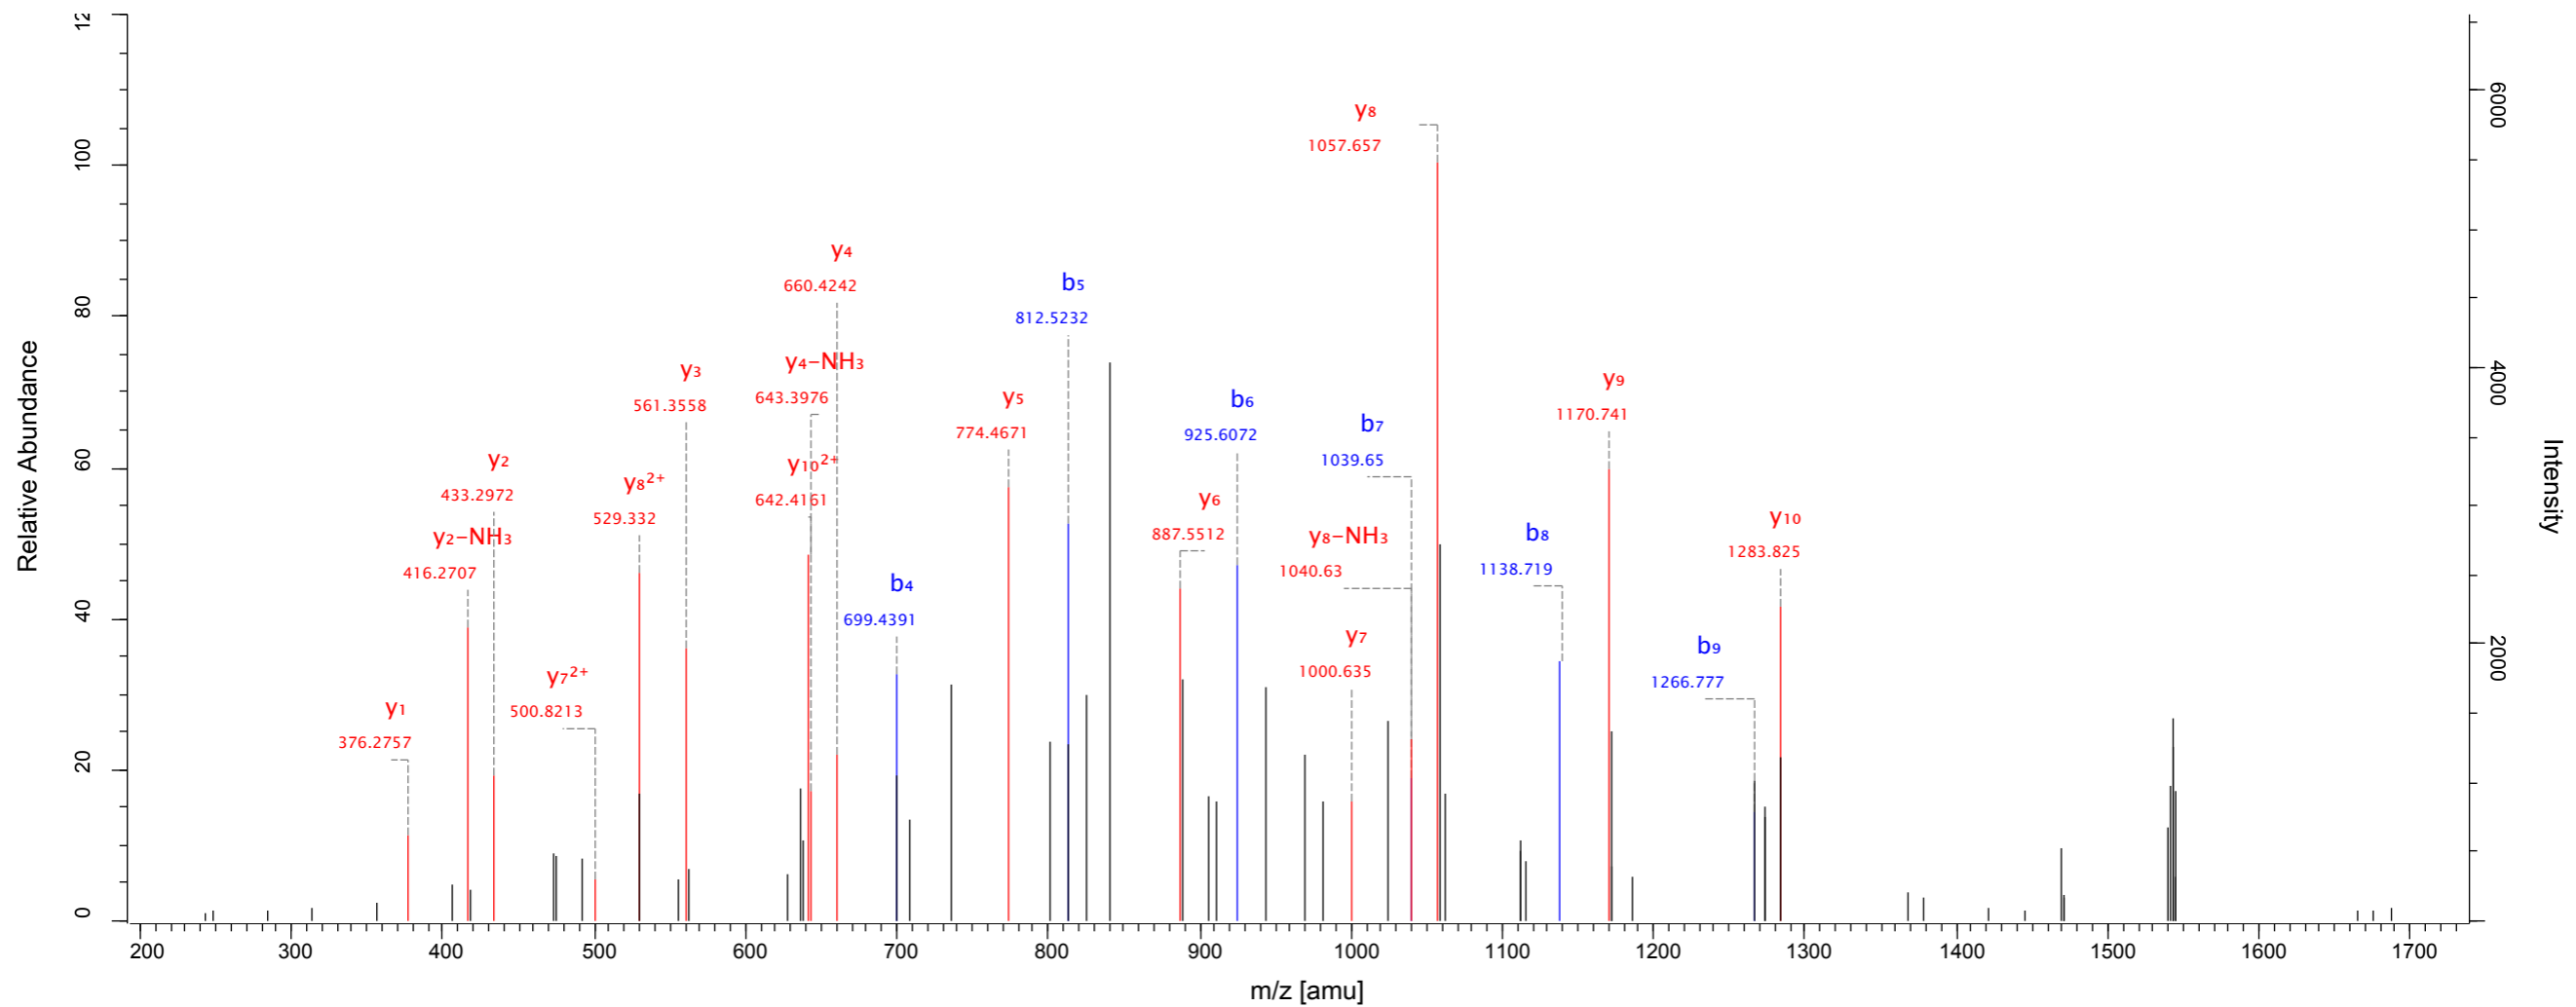

Source: mousePGC-TMT6plex-group1-240ug-205min-23-24  
Scannumber: 14113  
Protein: Smuc; Snai3; Zfp293; Slug; Slugh; Snai2; mCG\_124753; Q9QY31; P97469; Q3UZ96  
Peptide Score: 122.51  
Method: ITMS; CID; 1

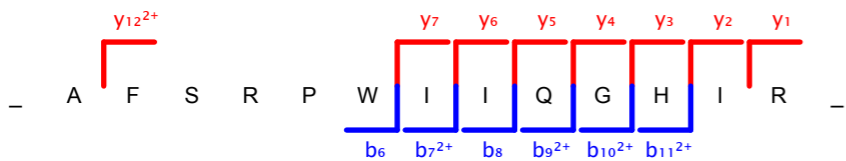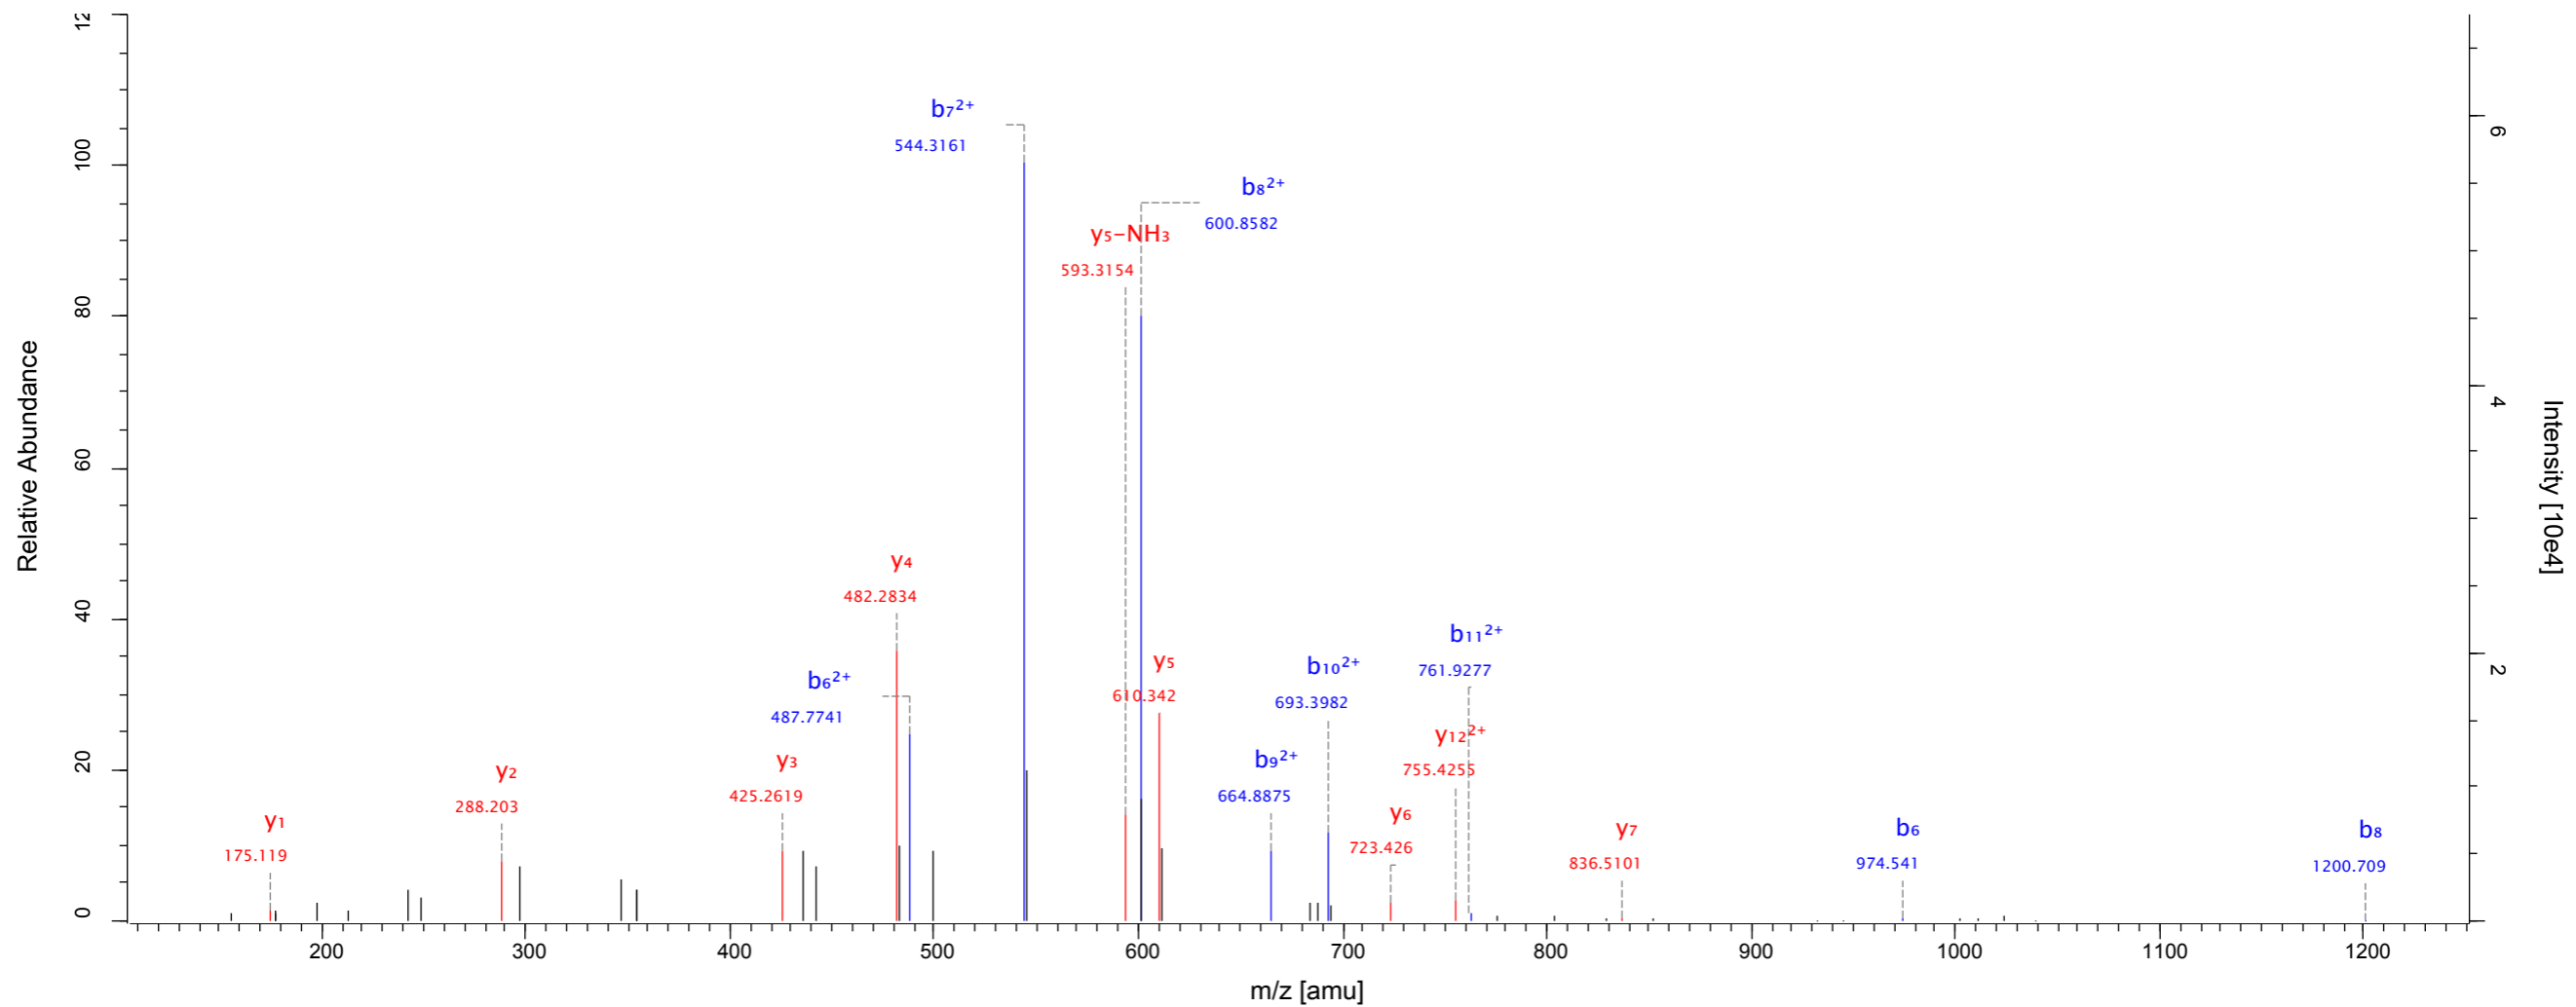

Source: mousePGC-TMT6plex-group1-240ug-205min-23-24  
Scannumber: 15637  
Protein: D5Ertd593e; Stbd1; D5Ertd593e; Stbd1; Q8C7E7; Q147V6  
Peptide Score: 148.28  
Method: ITMS; CID; 1

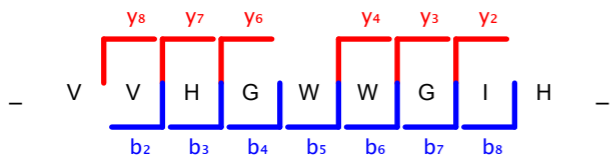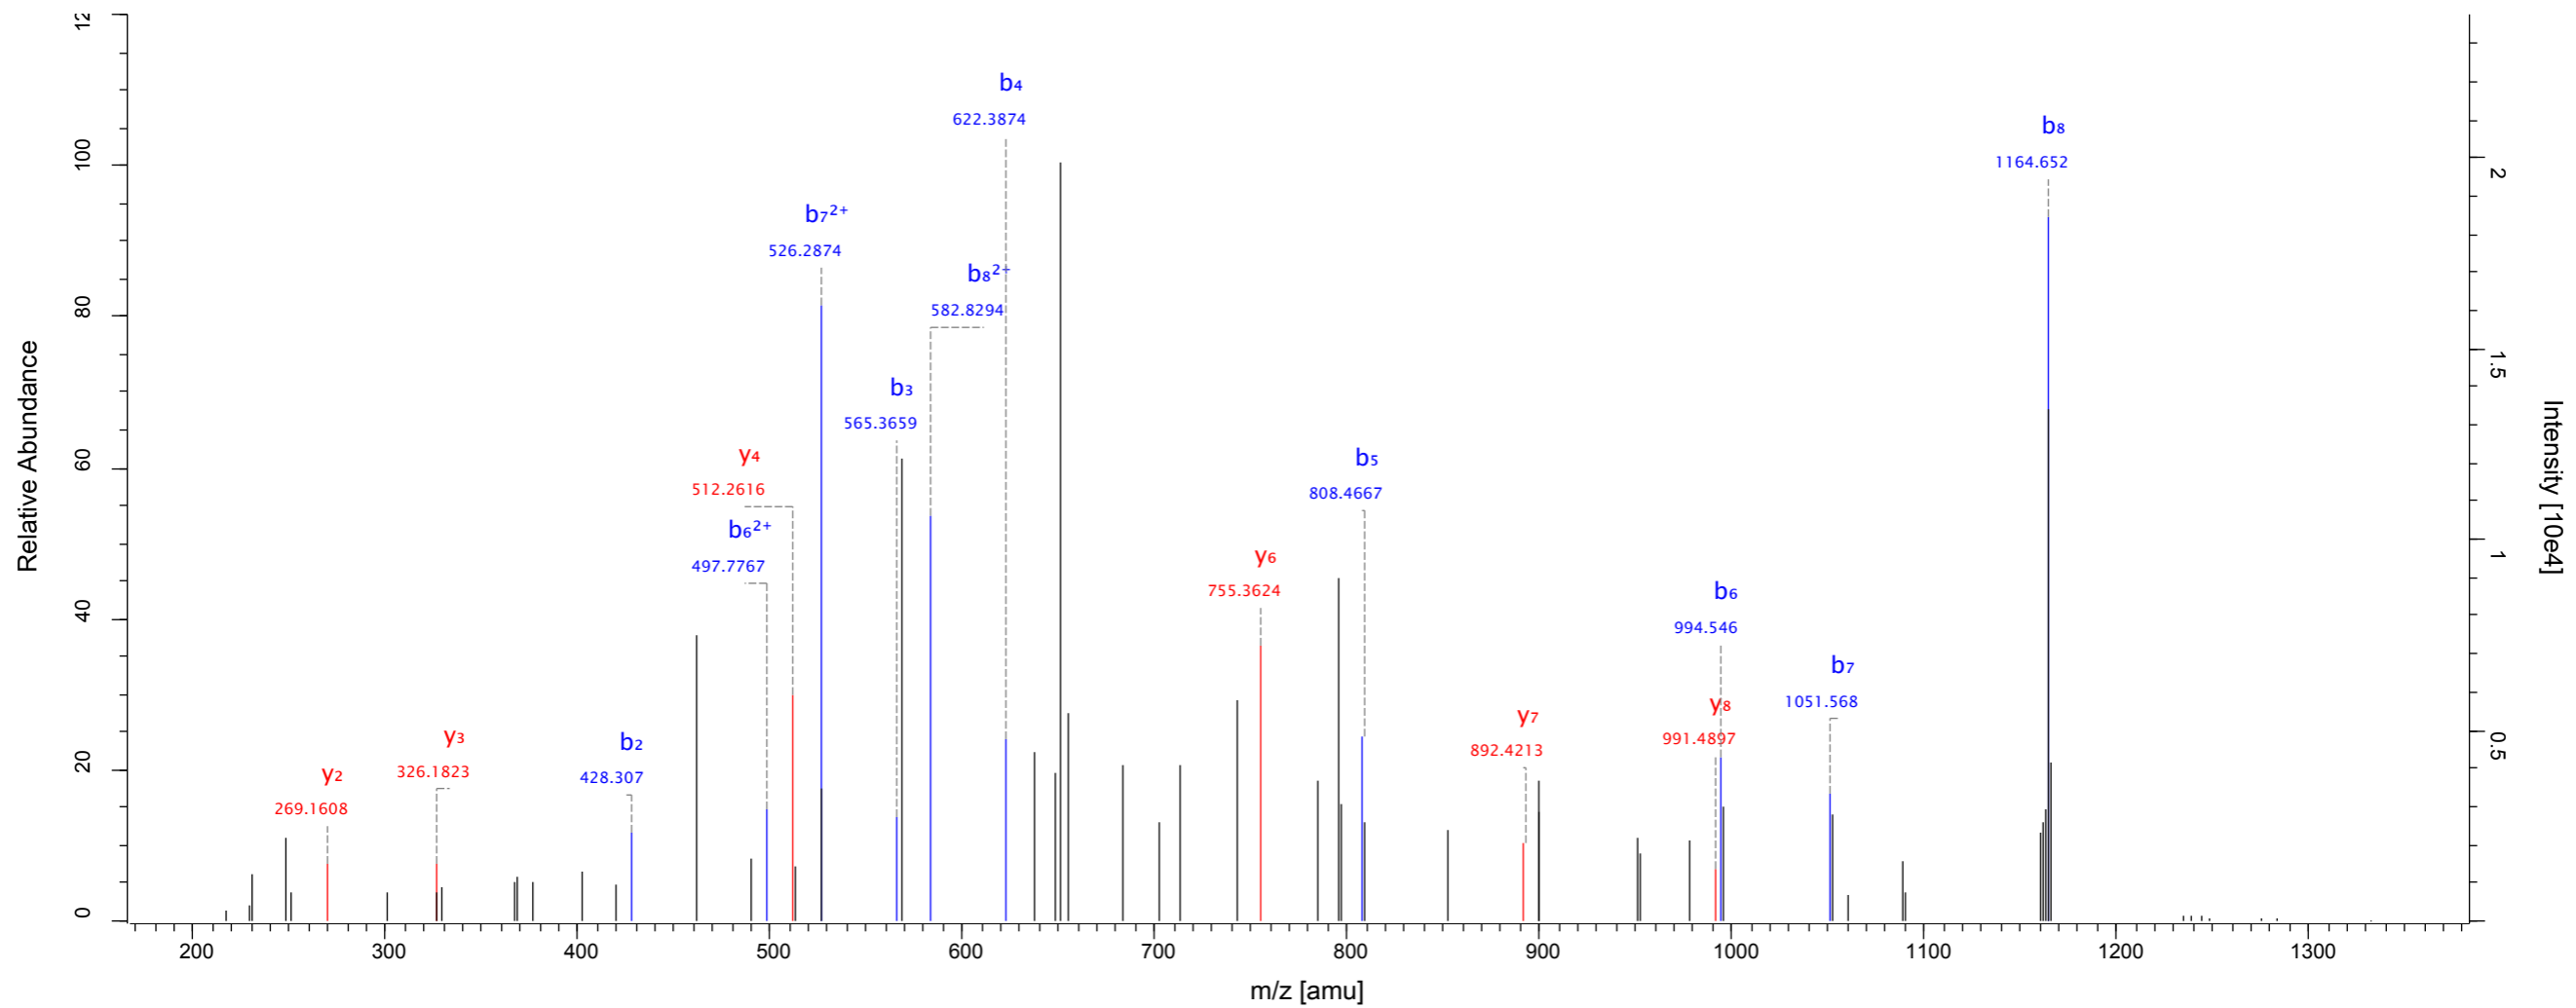

Source: mousePGC-TMT6plex-group1-240ug-205min-23-24

Scannumber: 22759

Protein: Ara55; Tgfb1i1; Q62219-3; Q62219; Q62219-1; Q62219; Q62219-2; Q62219; E9Q1D5; Q62219-4; Q62219; Q62219-5; Q62219; E9PYQ1;

Peptide Score: 137.95

Method: ITMS; CID; 1

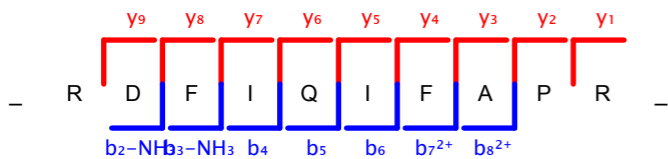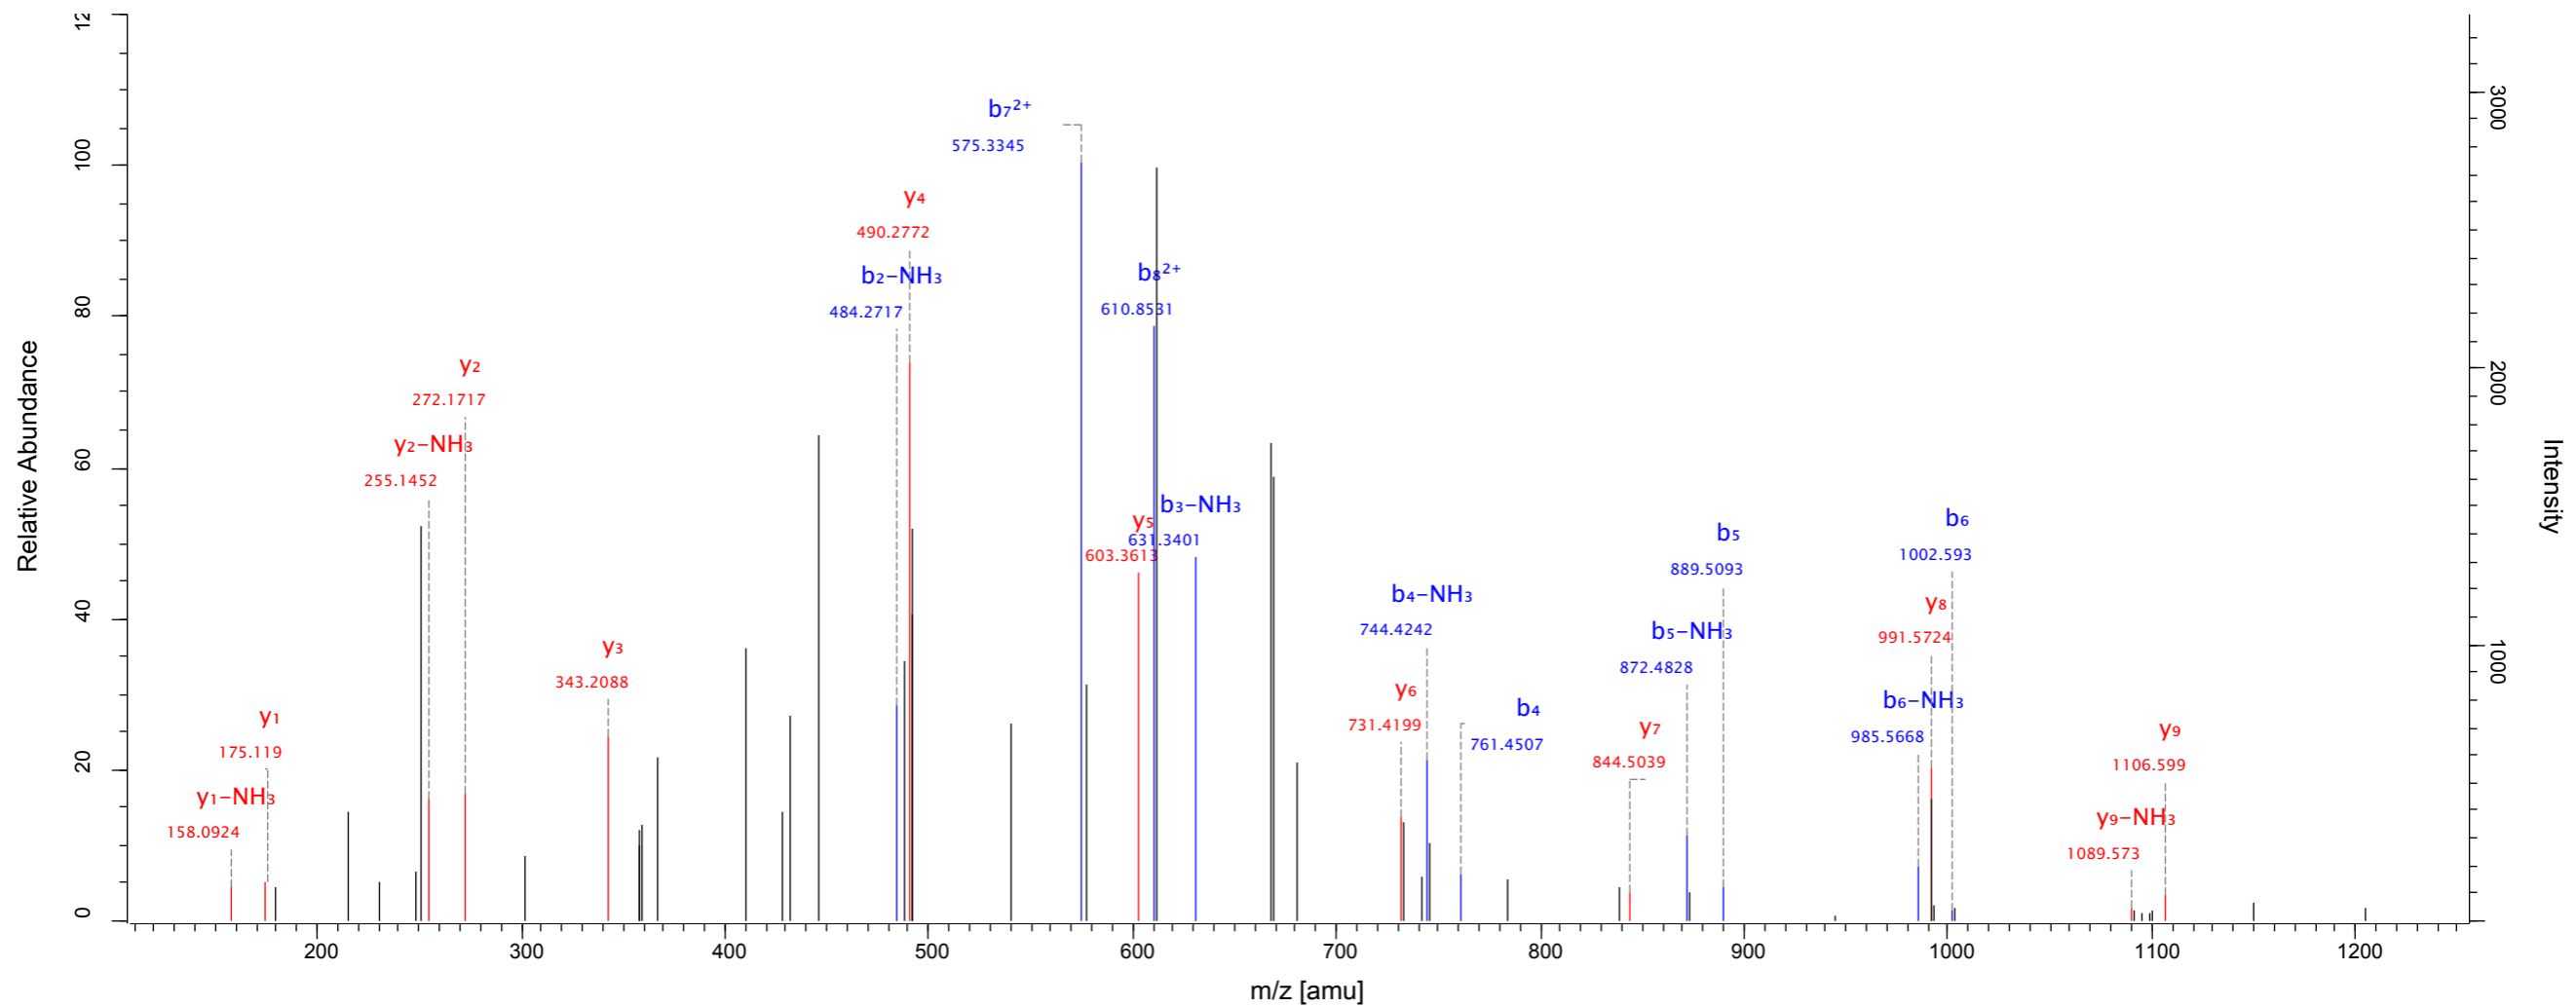

Source: mousePGC-TMT6plex-group1-240ug-205min-23-24  
Scannumber: 28299  
Protein: Mtmr7; Q9Z2C9  
Peptide Score: 188.04  
Method: ITMS; CID; 1

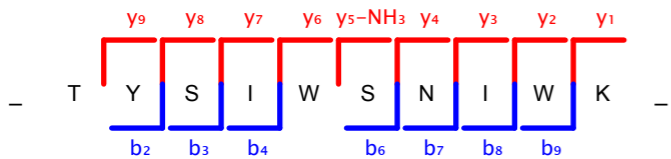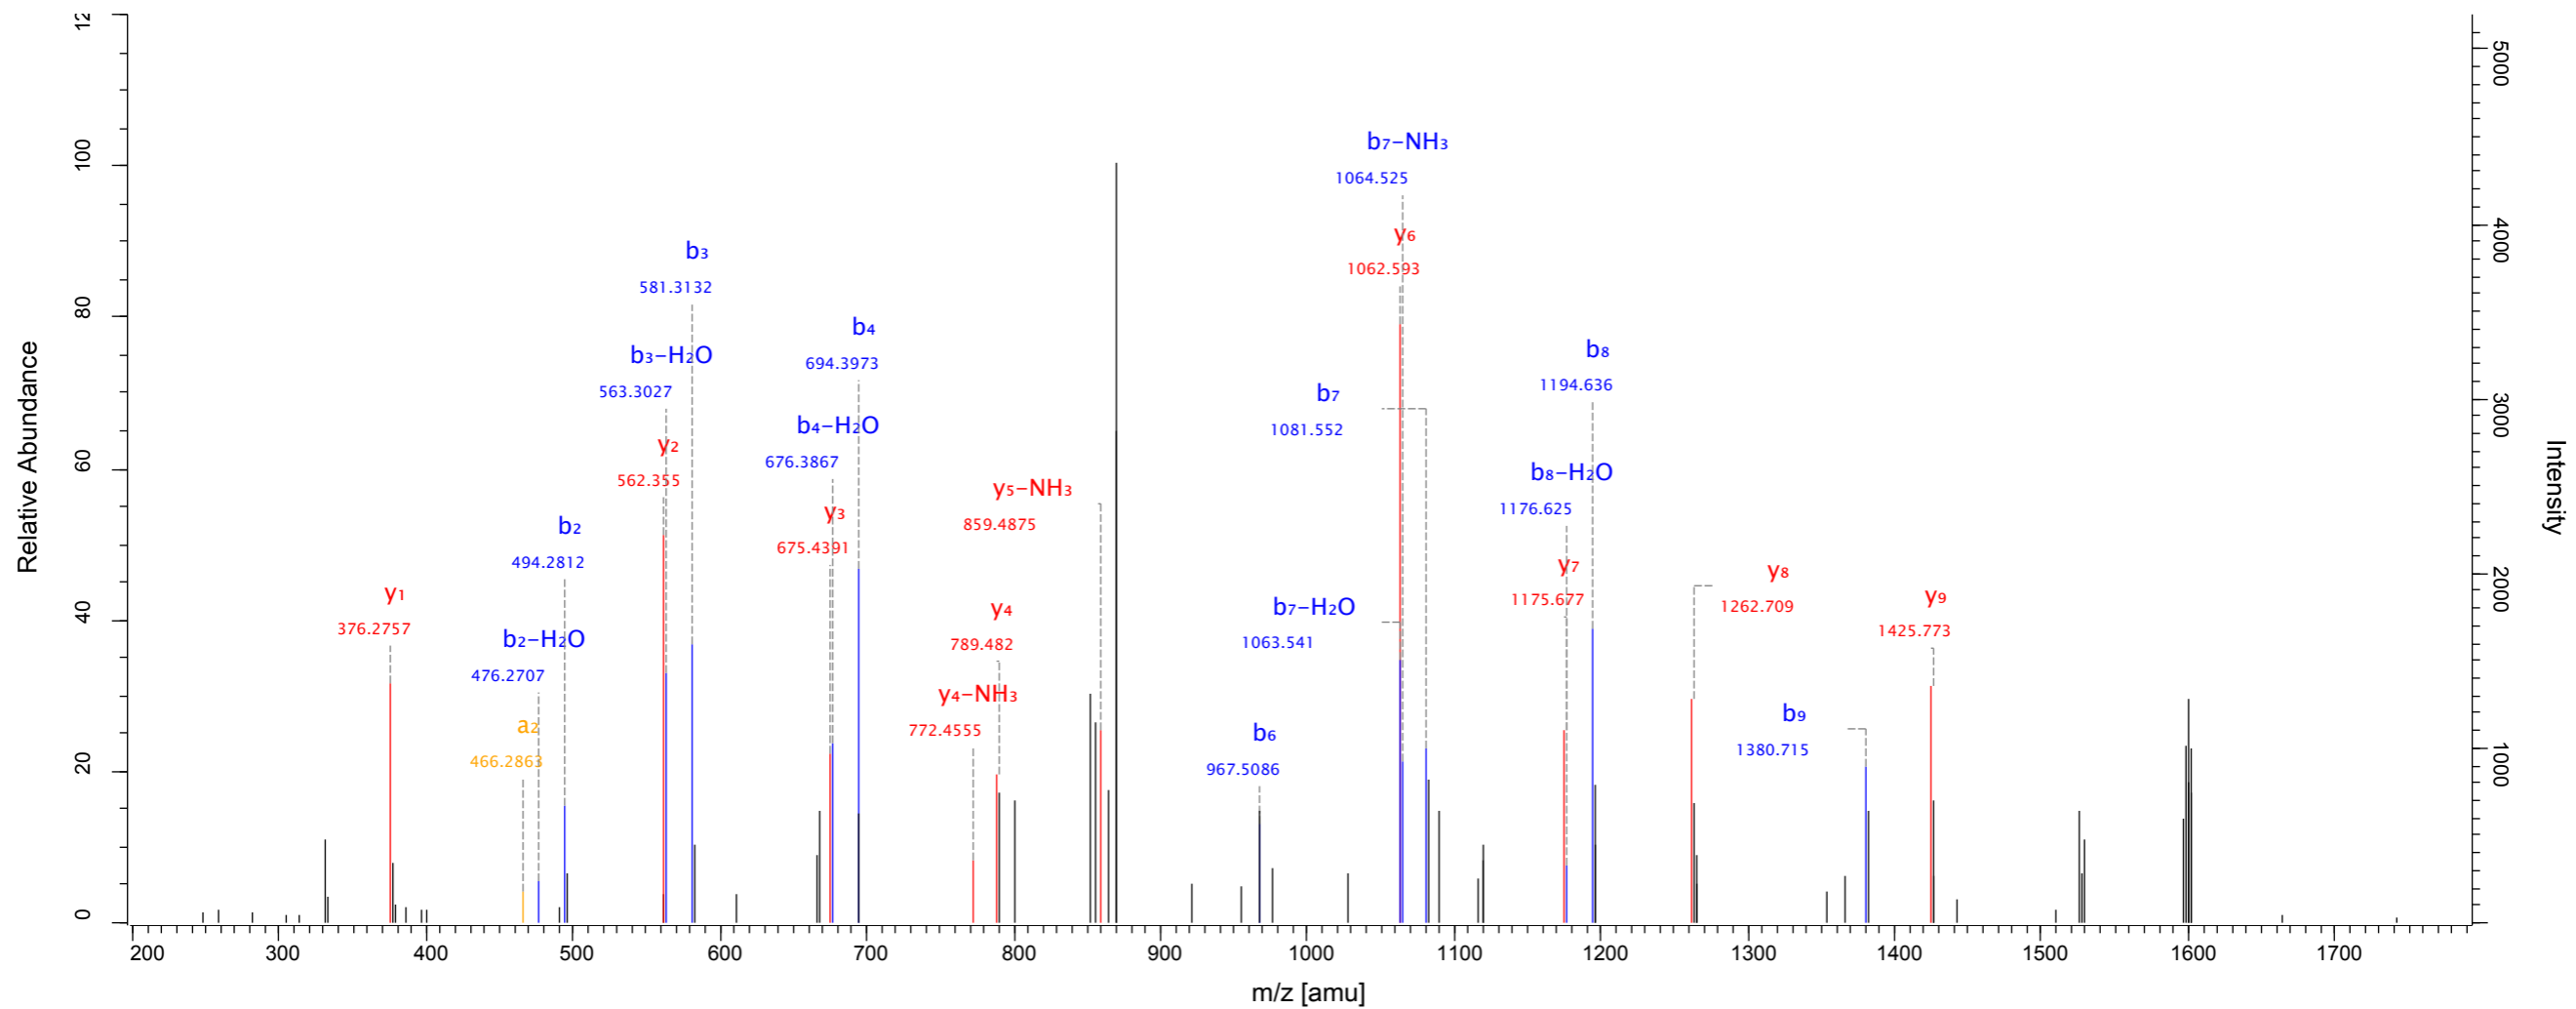

Source: mousePGC-TMT6plex-group1-240ug-205min-25-26  
Scannumber: 24904  
Protein: Bmn; Manba; Q8K2I4  
Peptide Score: 176.42  
Method: ITMS; CID; 1

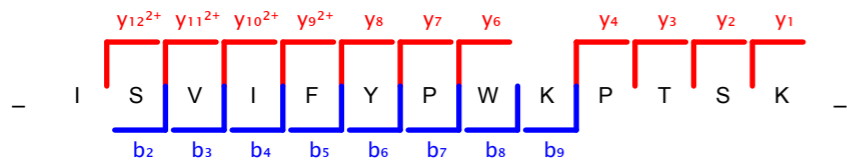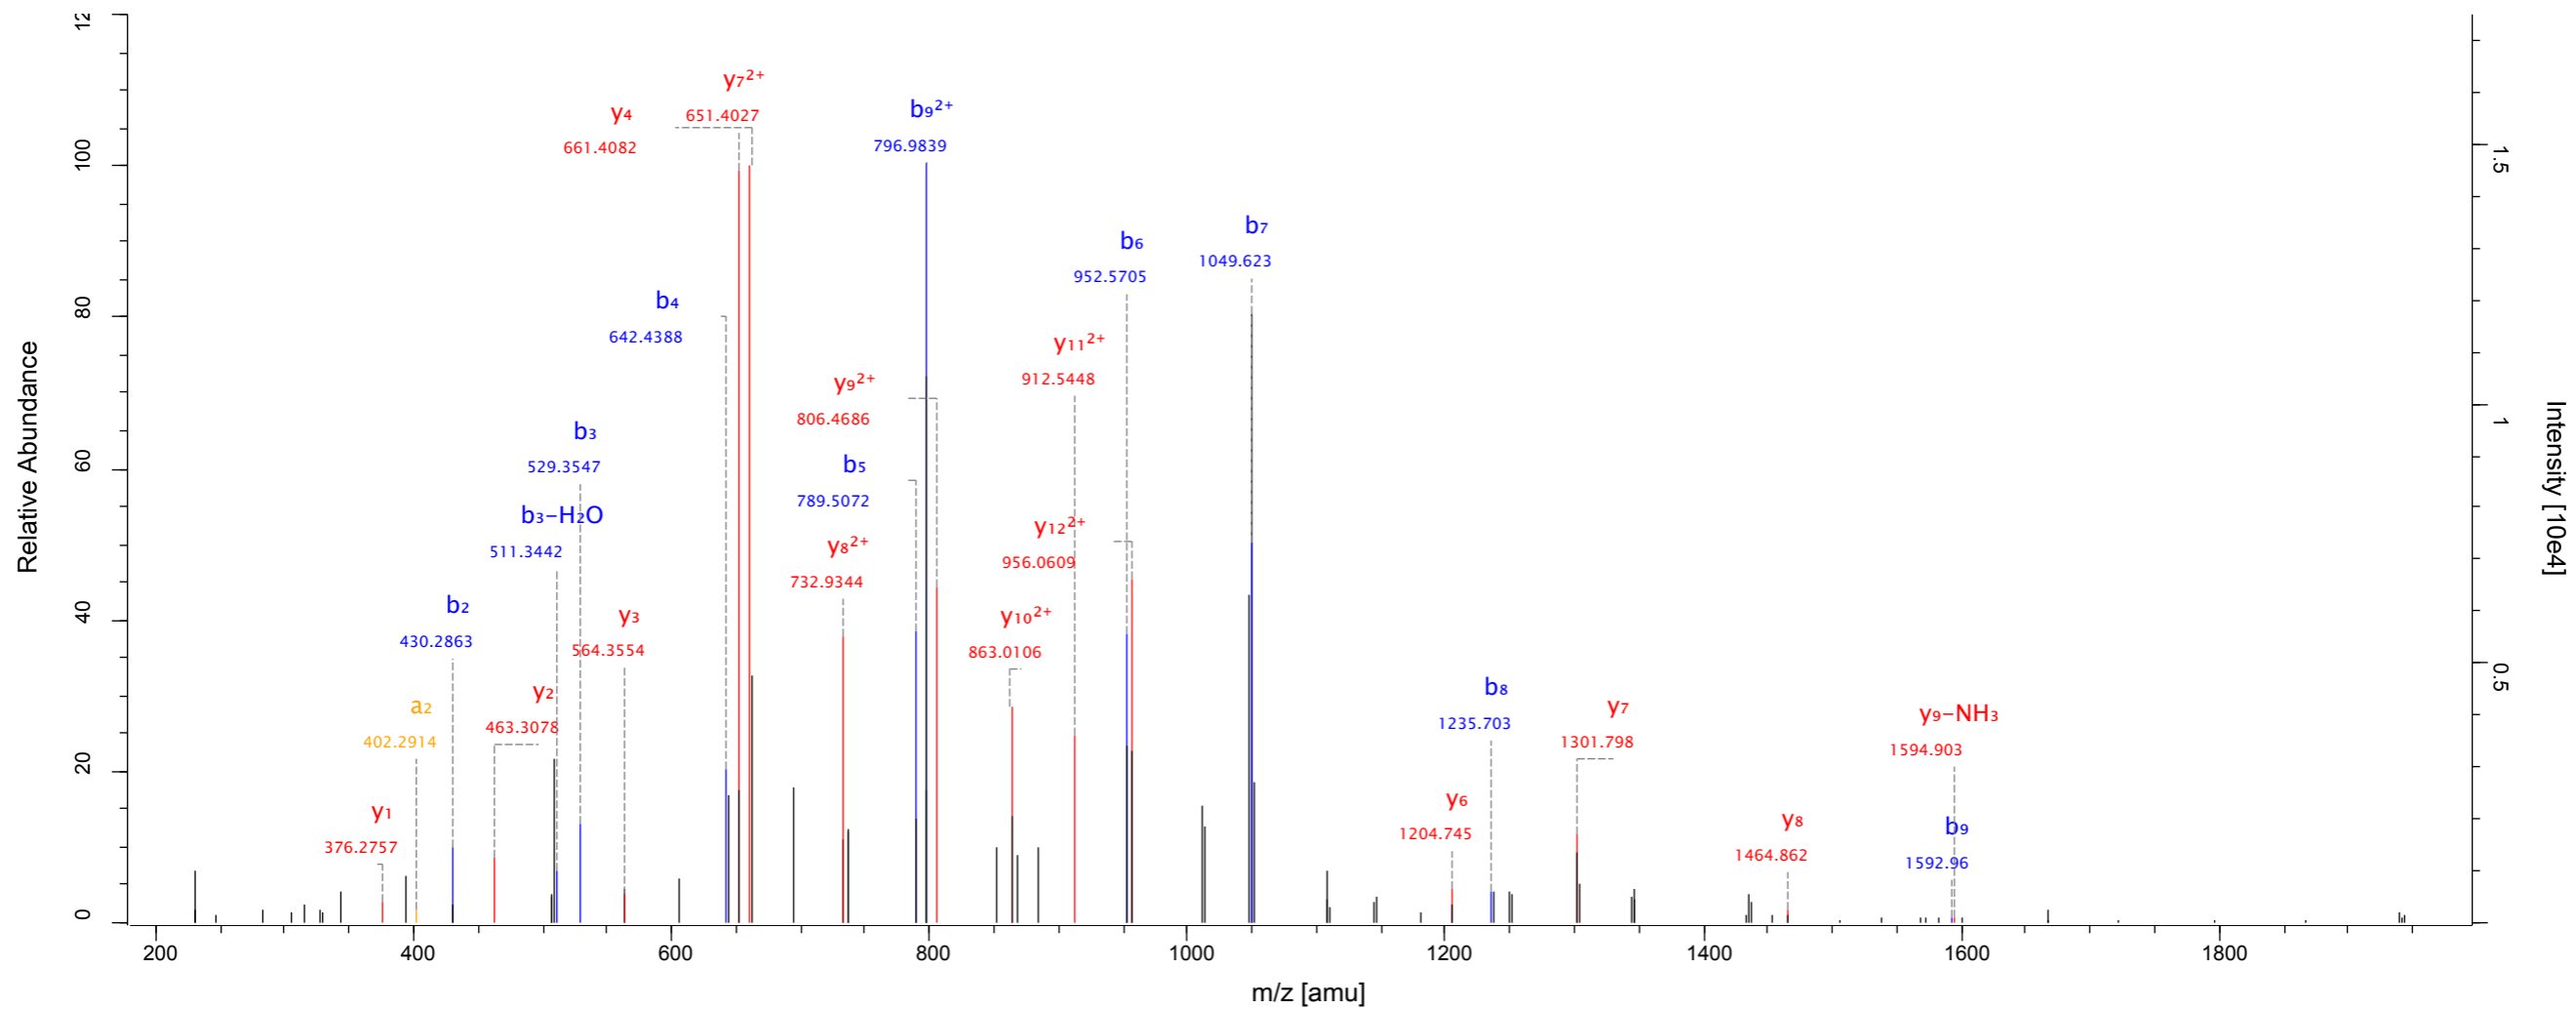



Source: mousePGC-TMT6plex-group1-240ug-205min-25-26  
Scannumber: 25612  
Protein: Bcs1l; Q9CZP5  
Peptide Score: 161.04  
Method: ITMS; CID; 1

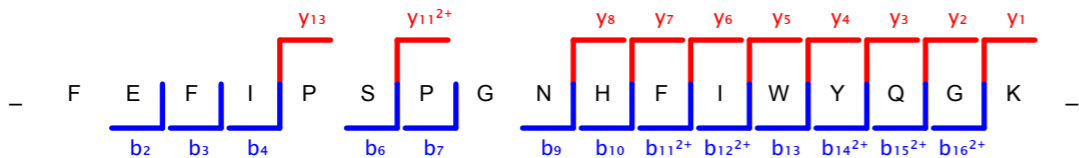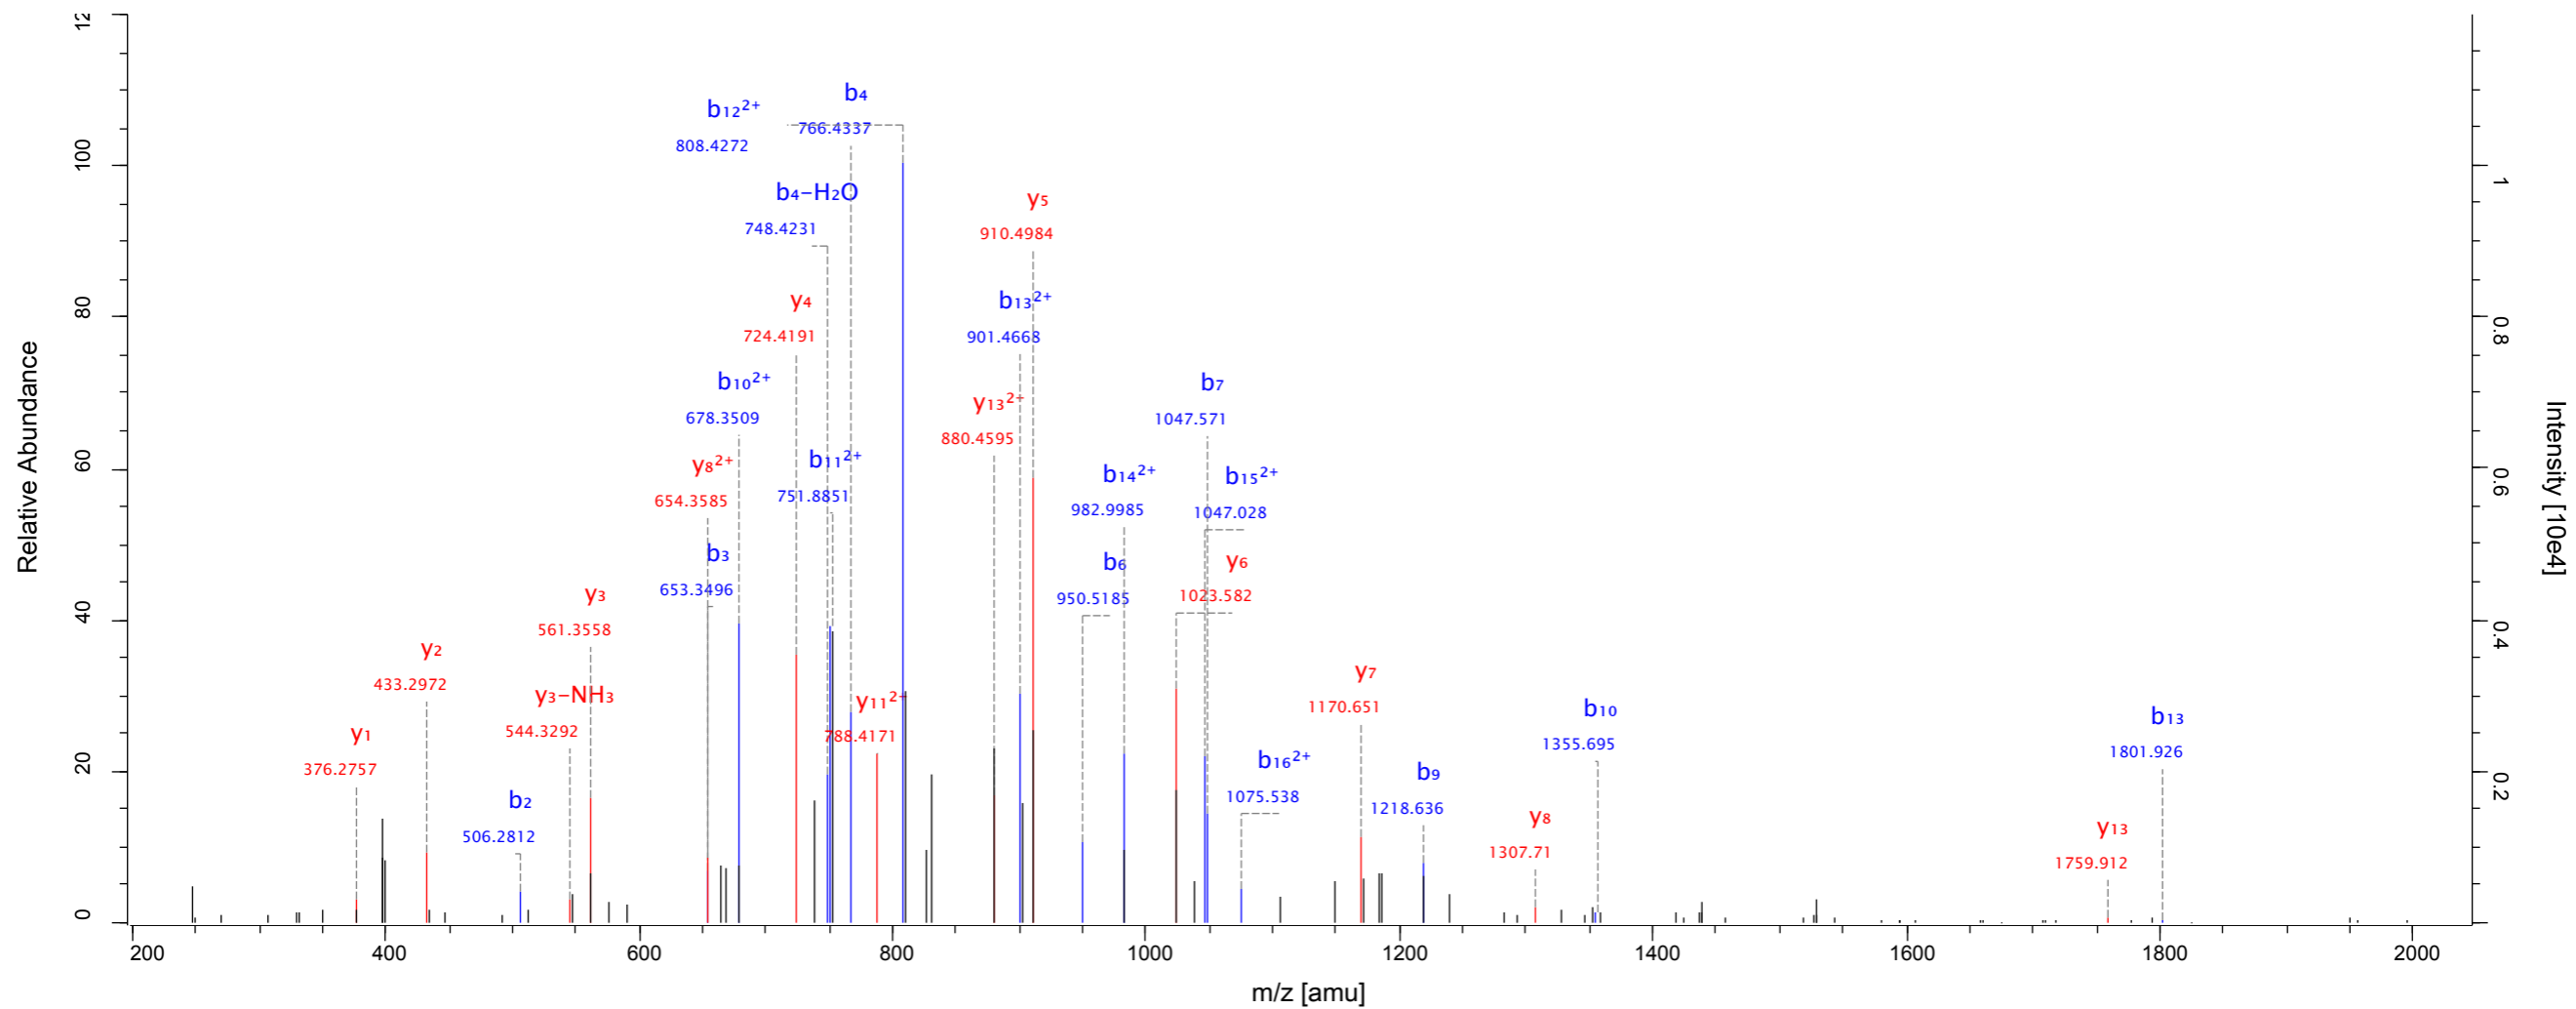

Source: mousePGC-TMT6plex-group1-240ug-205min-27-28  
 Scannumber: 16853  
 Protein: Fanca; Fanca; B2RWU3; E9QKQ4; Q9CS36; Q9JL70  
 Peptide Score: 150.22  
 Method: ITMS; CID; 1

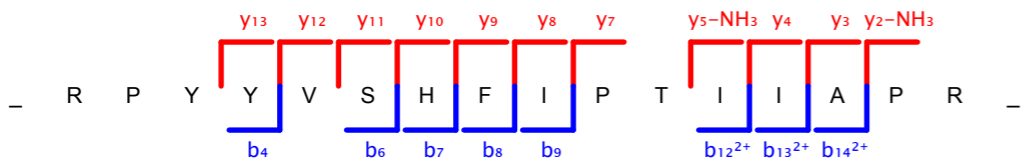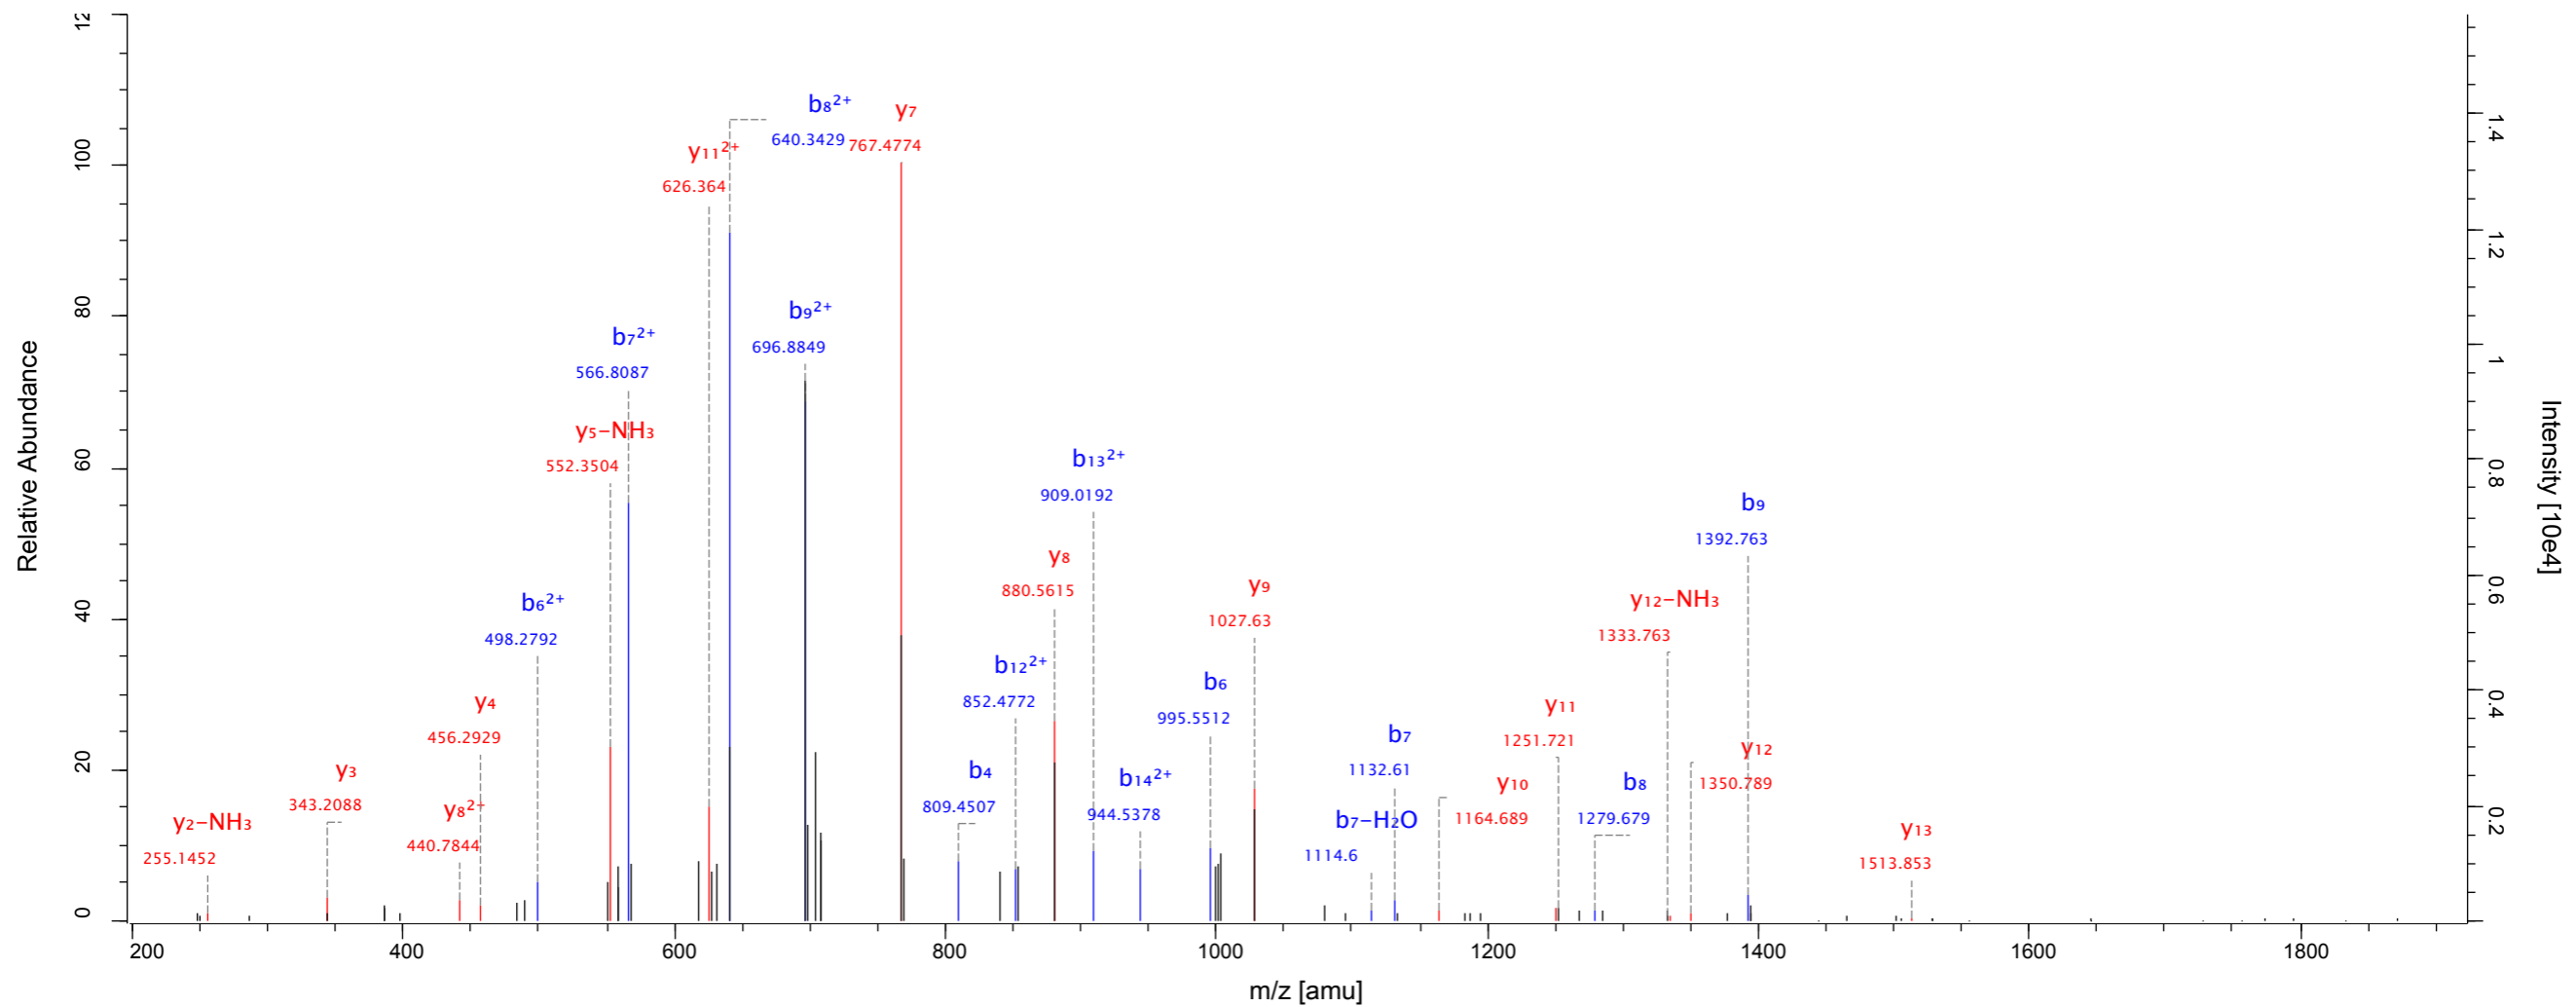

Source: mousePGC-TMT6plex-group1-240ug-205min-27-28  
Scannumber: 22872  
Protein: Sesn1; E9PXR3; Q497S6  
Peptide Score: 123.72  
Method: ITMS; CID; 1

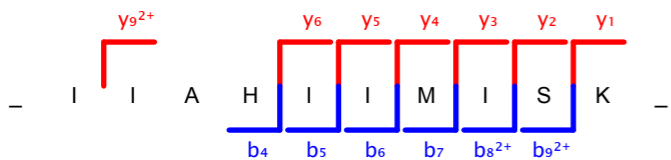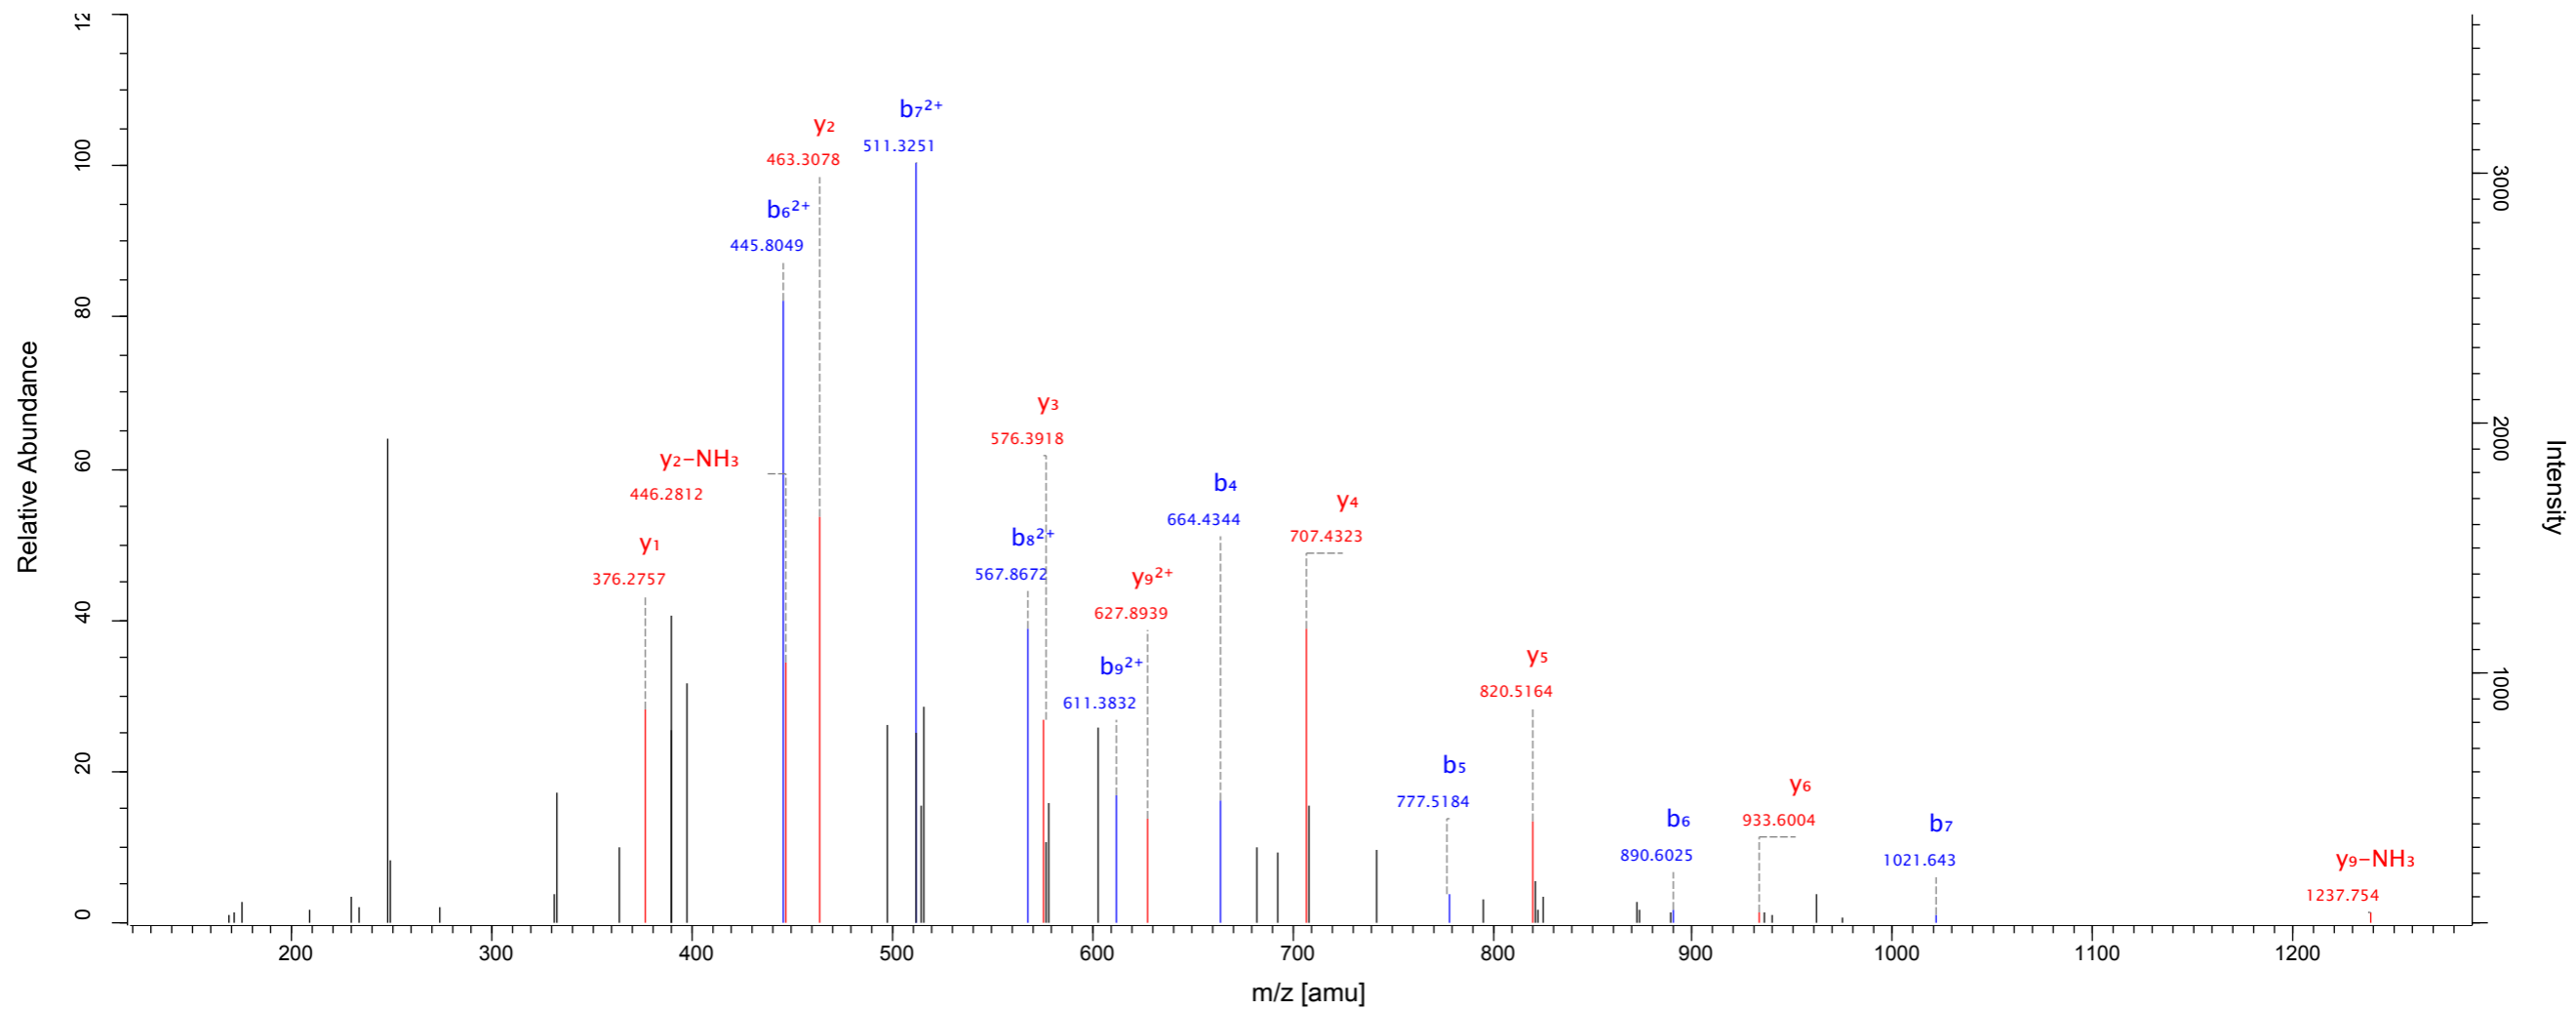

Source: mousePGC-TMT6plex-group1-240ug-205min-27-28  
Scannumber: 25402  
Protein: Fgb; mCG\_17068; Q8K0E8; Q3TGR2  
Peptide Score: 138.22  
Method: ITMS; CID; 1

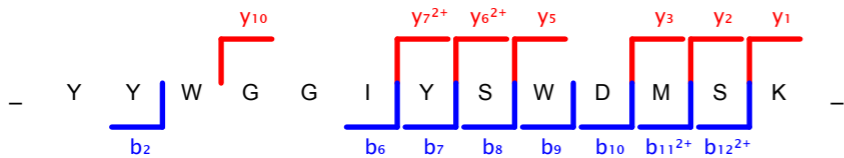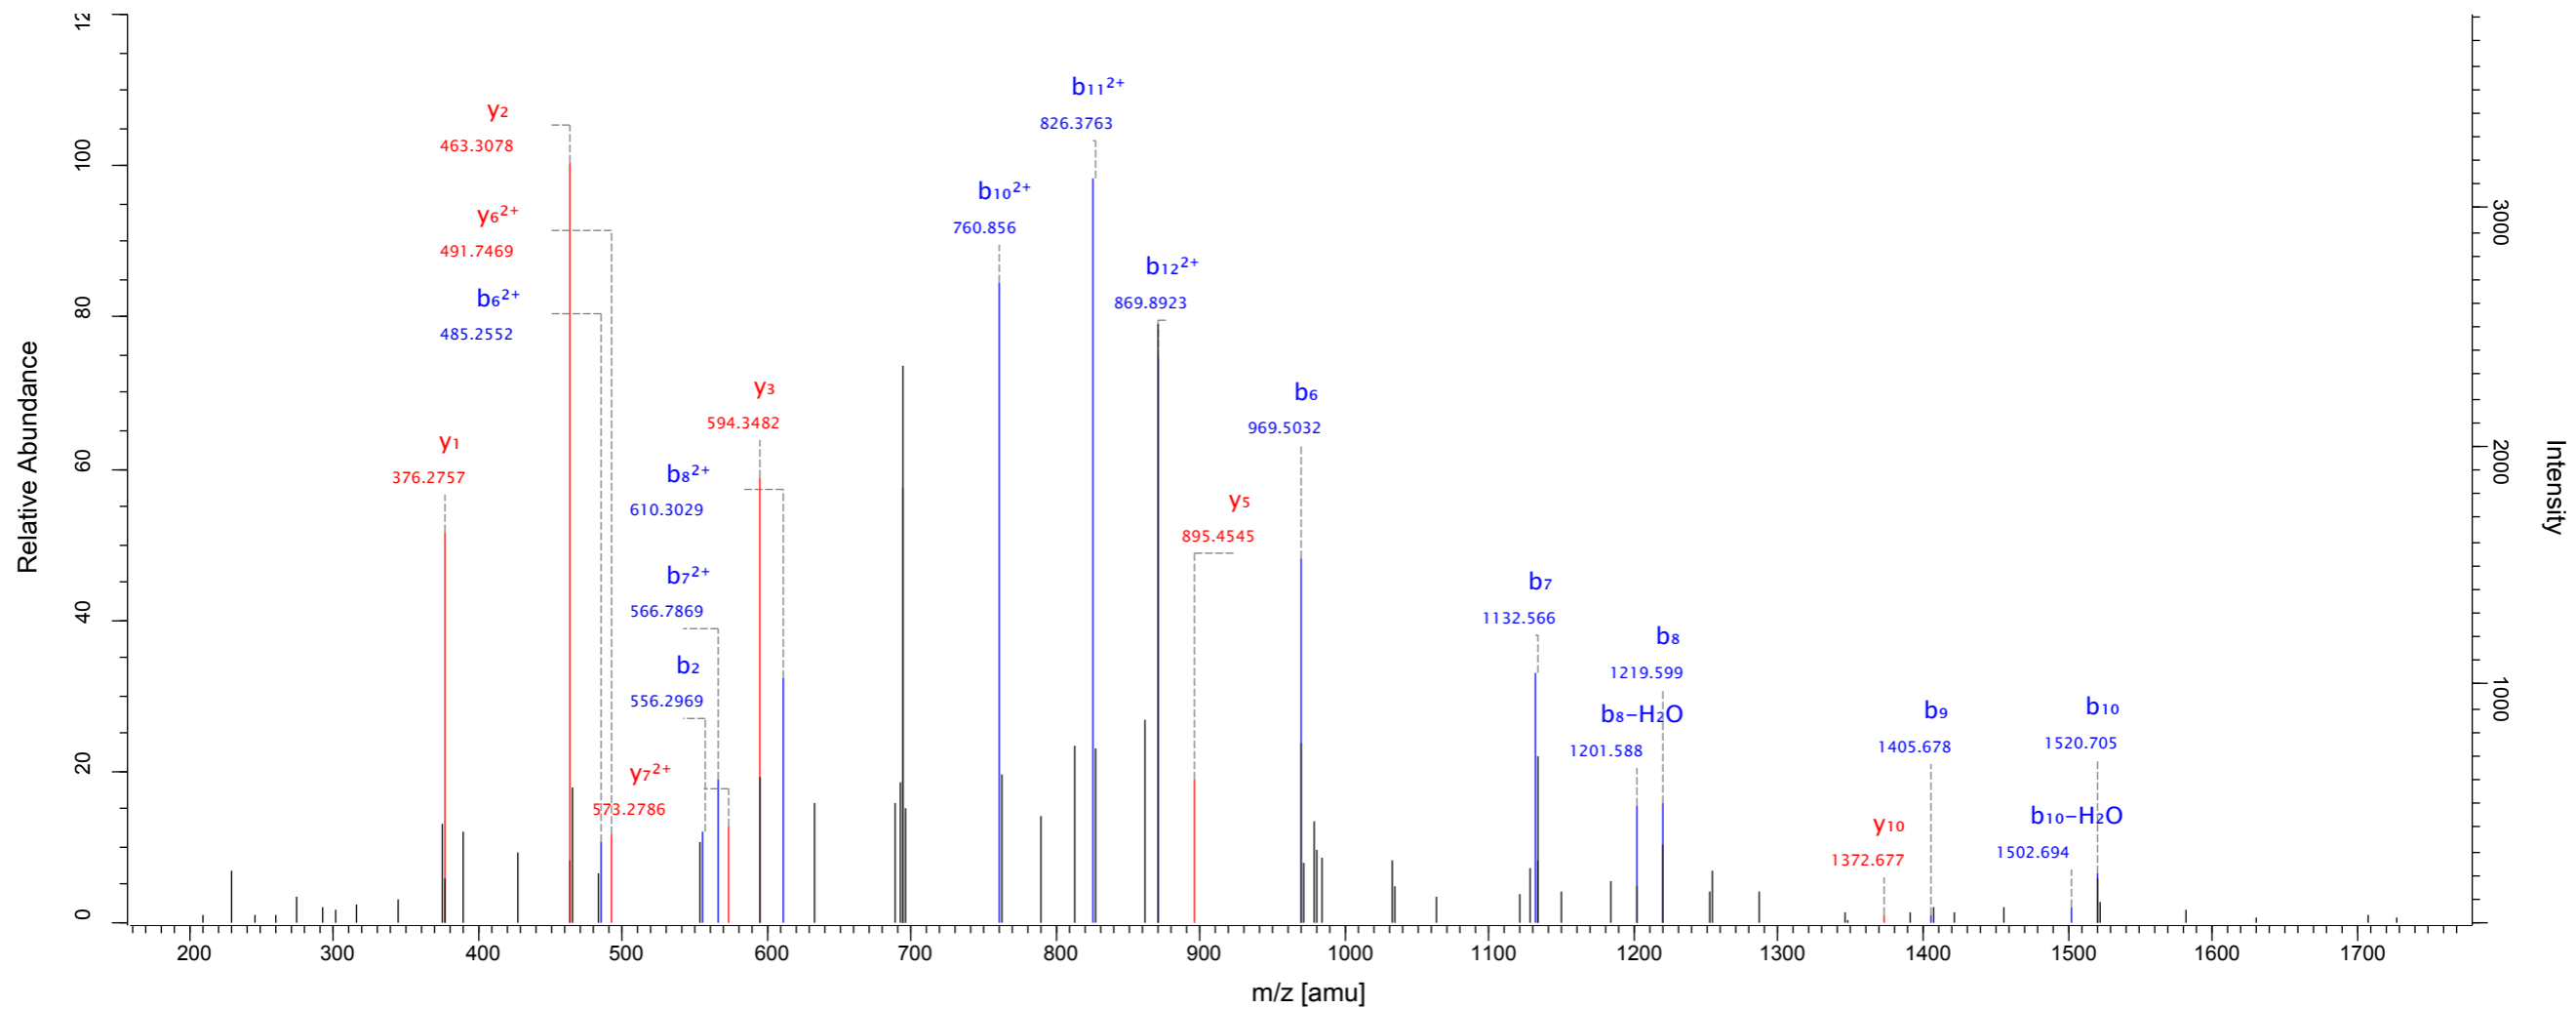

Source: mousePGC-TMT6plex-group1-240ug-205min-27-28  
Scannumber: 25932  
Protein: Ptpn9; O35239; Q2M4G8  
Peptide Score: 143.7  
Method: ITMS; CID; 1

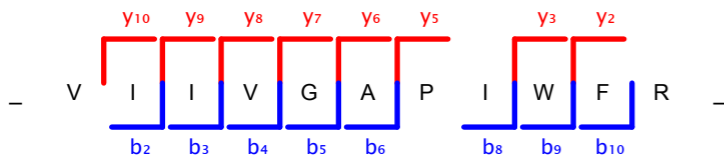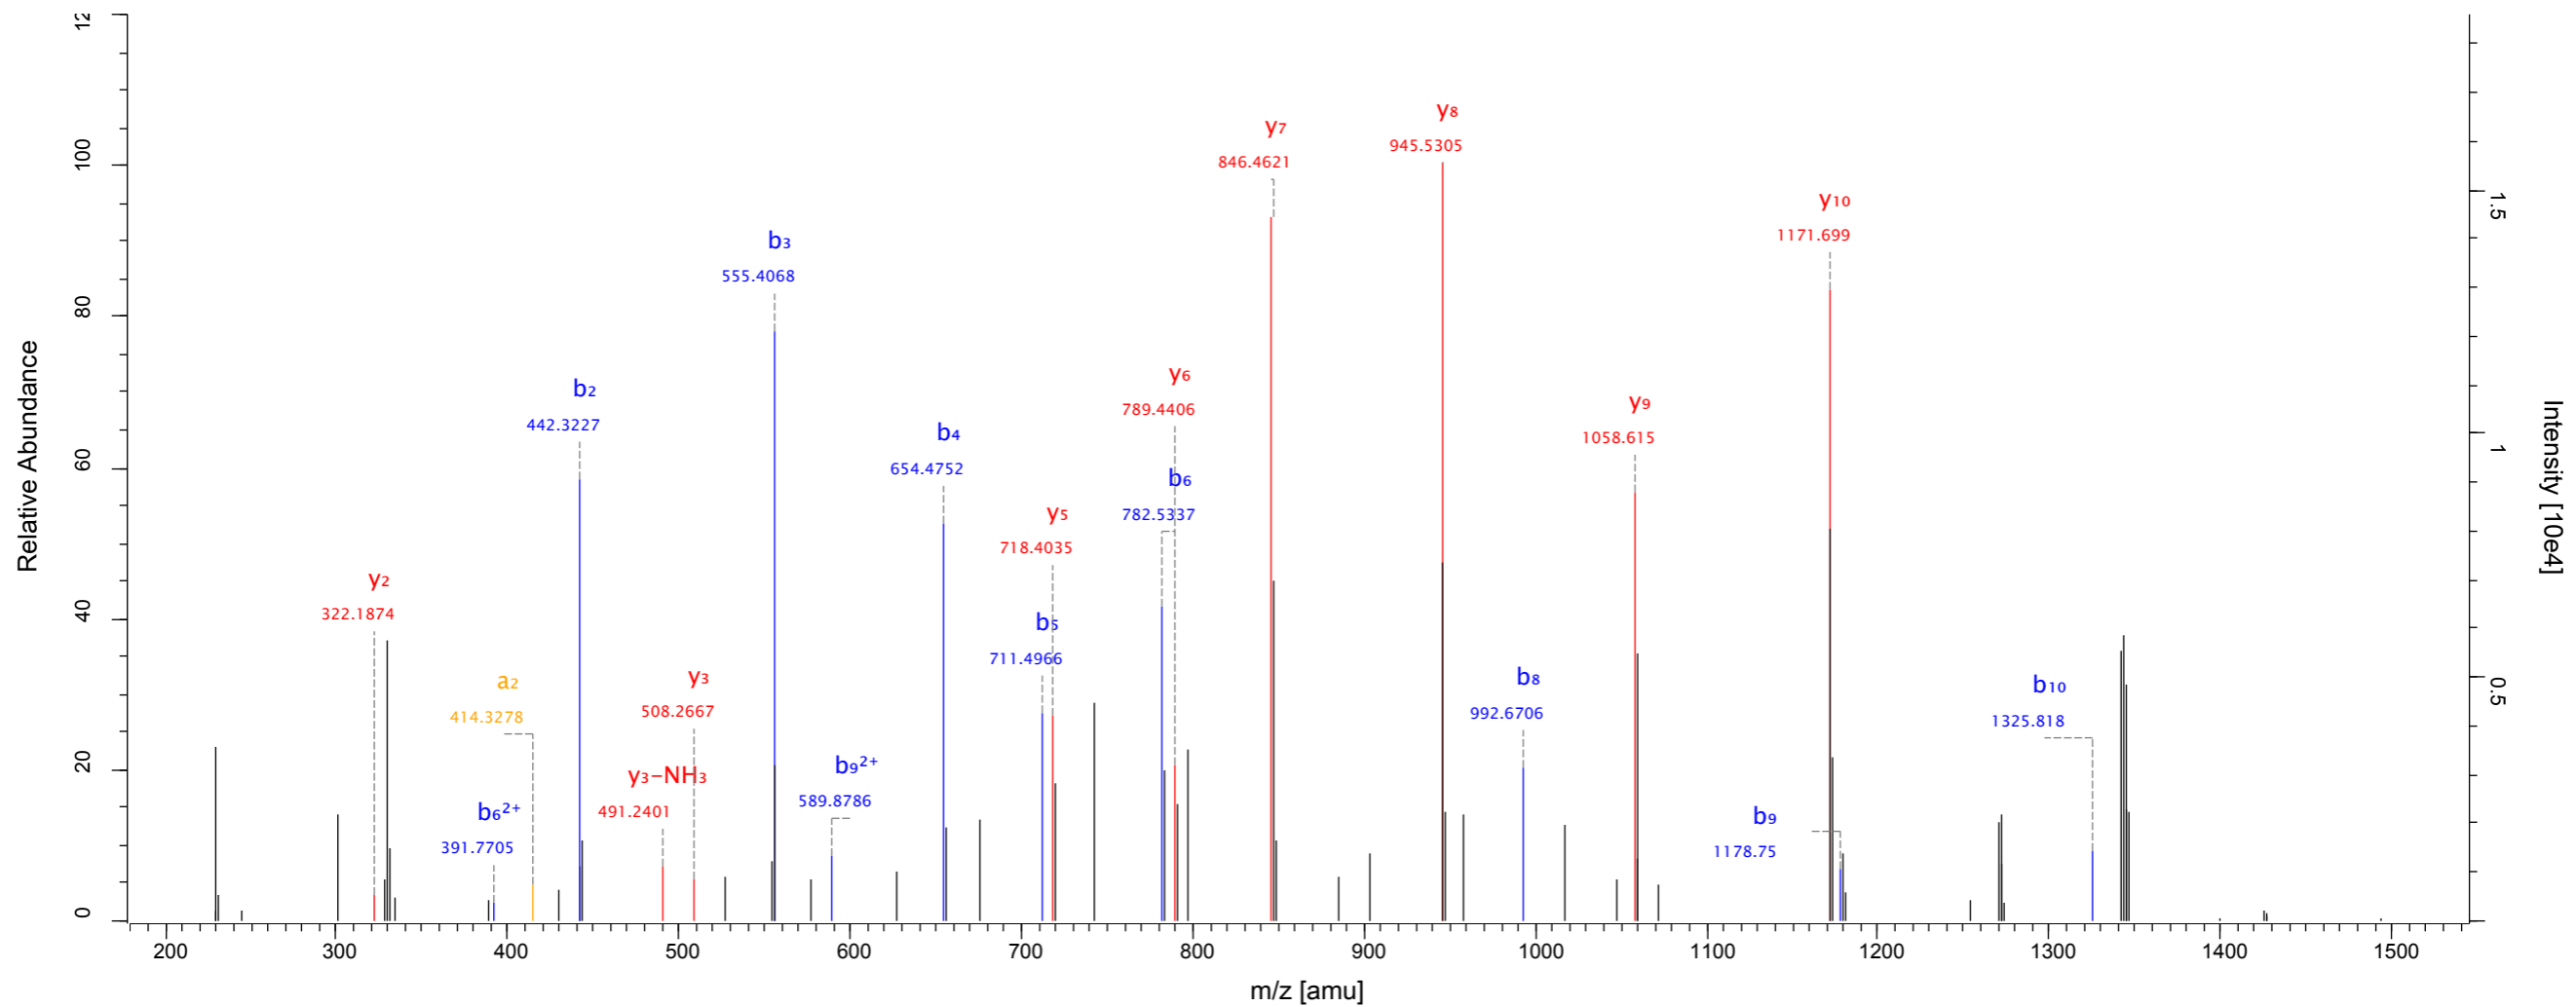

Source: mousePGC-TMT6plex-group1-240ug-205min-27-28  
 Scannumber: 30013  
 Protein: Fad104; Fncd3b; Kiaa4164; Ns5abp37; Q6NWW9  
 Peptide Score: 162.68  
 Method: ITMS; CID; 1

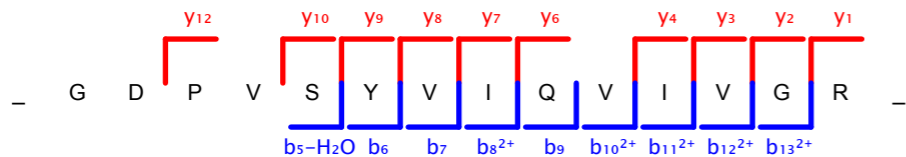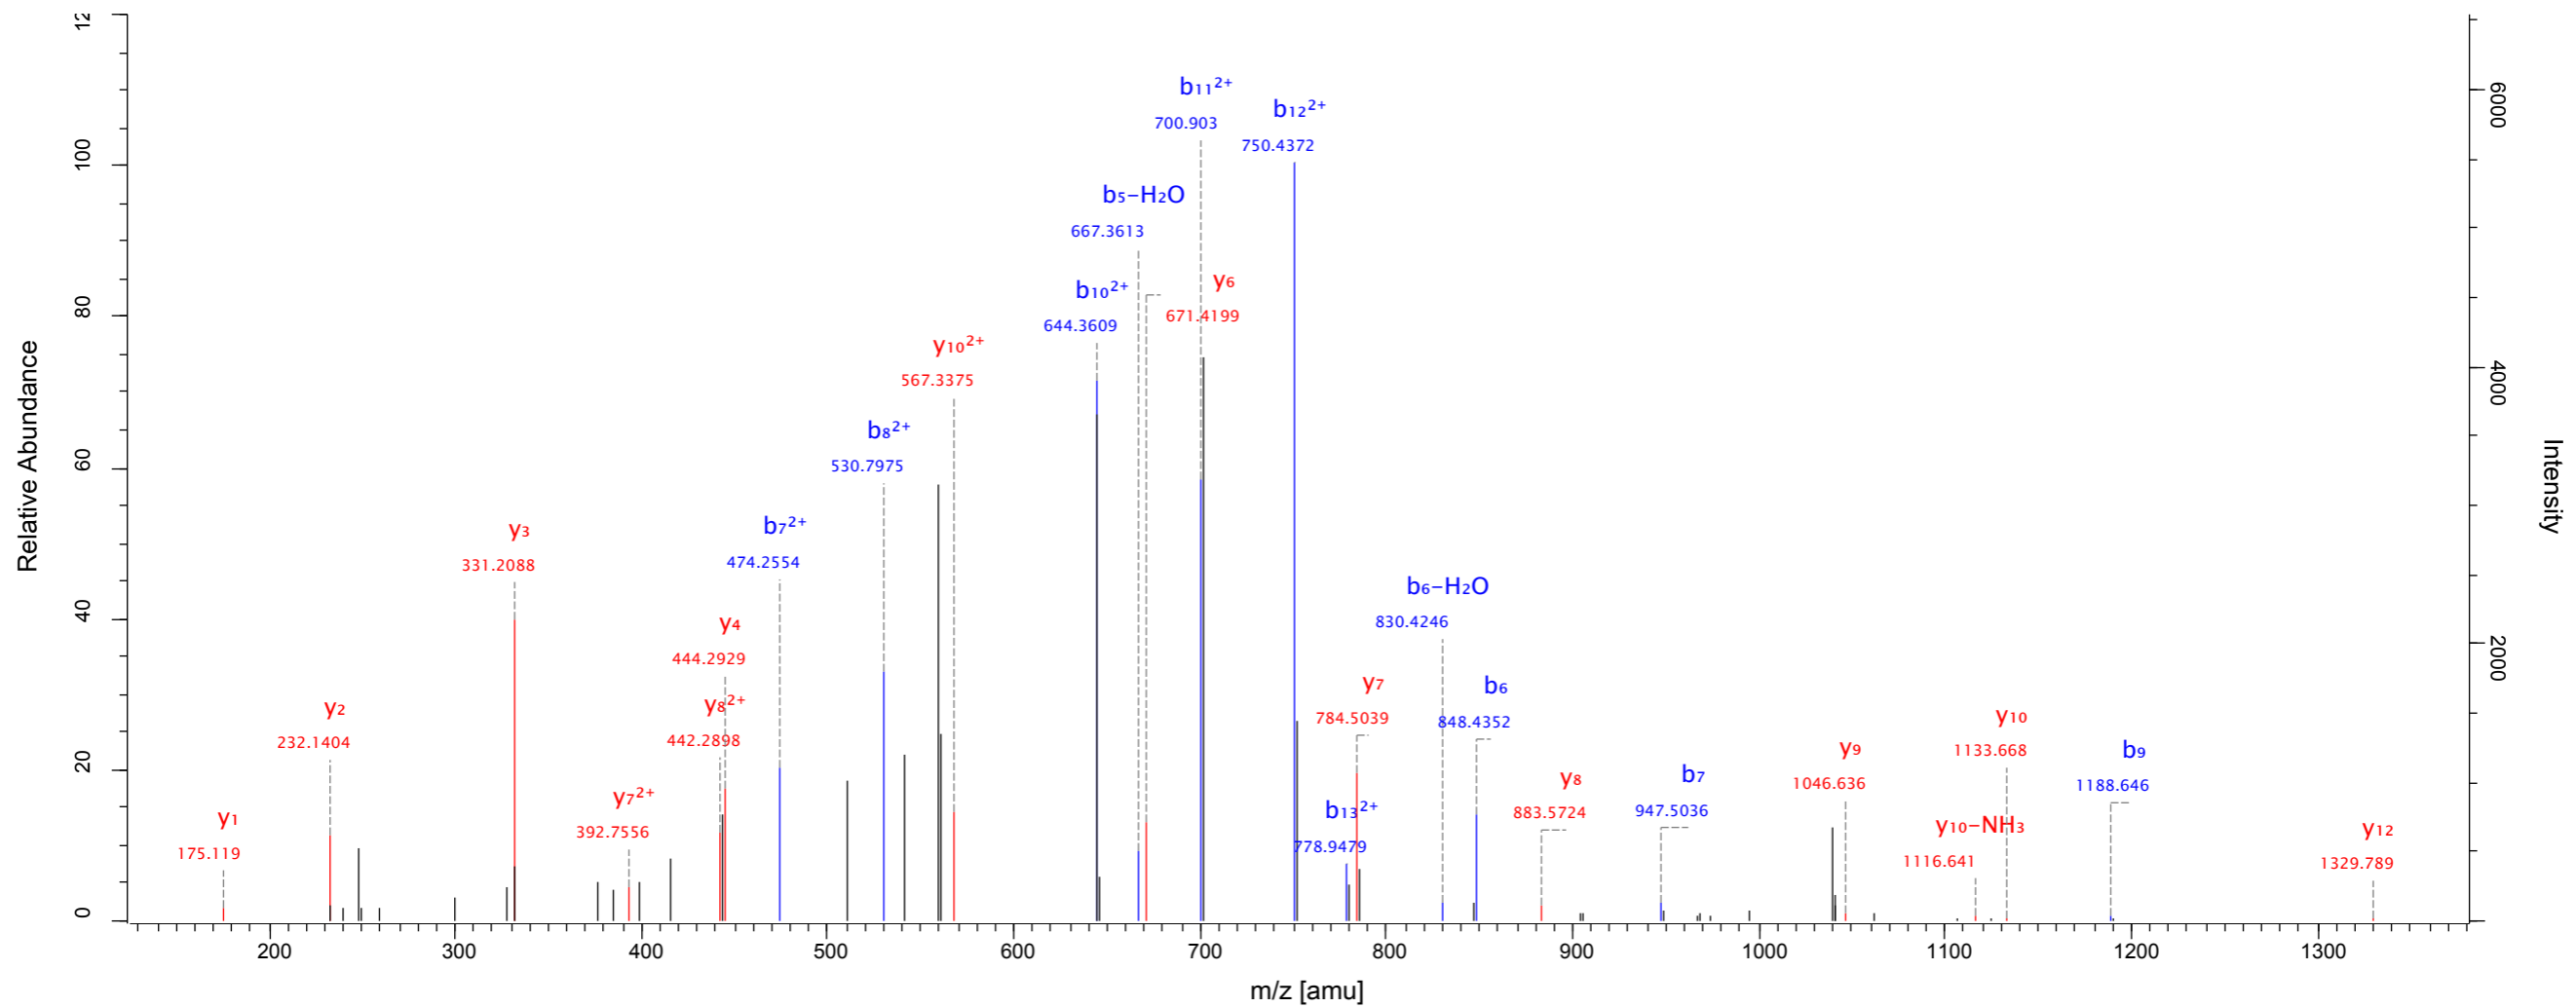

Source: mousePGC-TMT6plex-group1-240ug-205min-31-32

Scannumber: 19137

Protein: RP23-95K12.1-001; Xlr5c; Xlr5; RP23-11C16.7-001; Xlr5a; EG667719; RP23-11C16.10-002; Xlr5b; Xlr5a; Xlr5d; RP23-11C16.7-003; Xlr5a; EG667719; RP23-11C16.10-001; Xlr5b; A2AIE6; Q9JJR2; A2BI45; A2BI50; Q80UK6; A2BI46; A2BI49

Peptide Score: 90.61

Method: ITMS; CID; 1

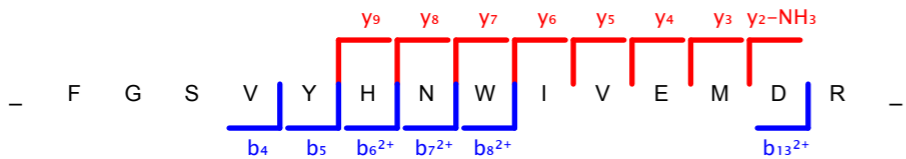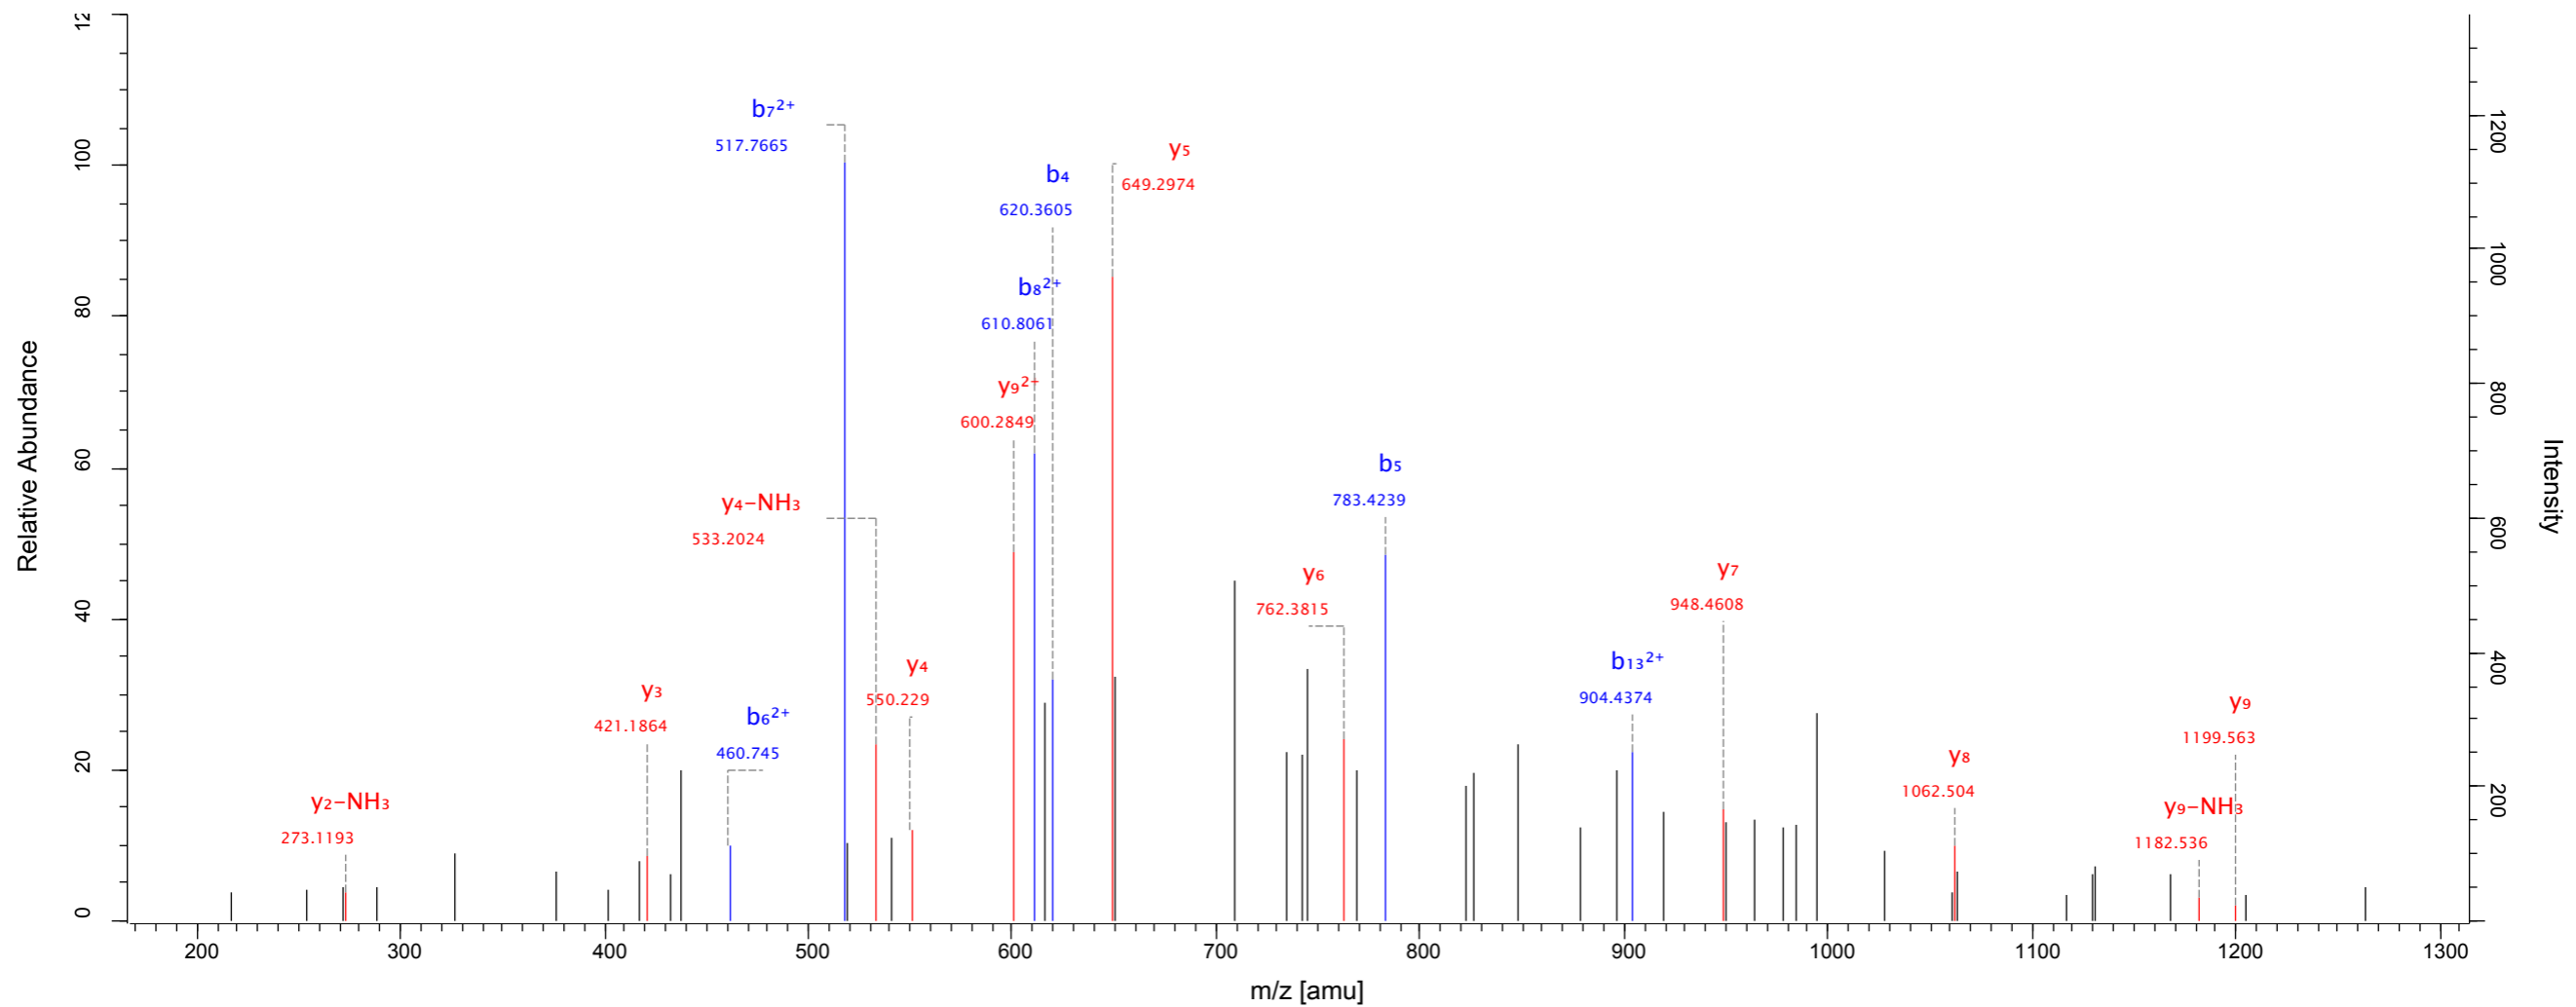

Source: mousePGC-TMT6plex-group1-240ug-205min-37-38  
Scannumber: 20894  
Protein: Pigq; Gpi1h; Mgpi1; Pigq; mCG\_1573; Q3TD14; Q9QYT7; Q3TF56  
Peptide Score: 131.83  
Method: ITMS; CID; 1

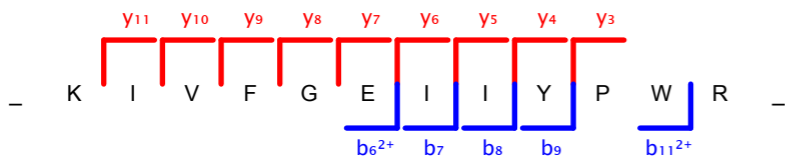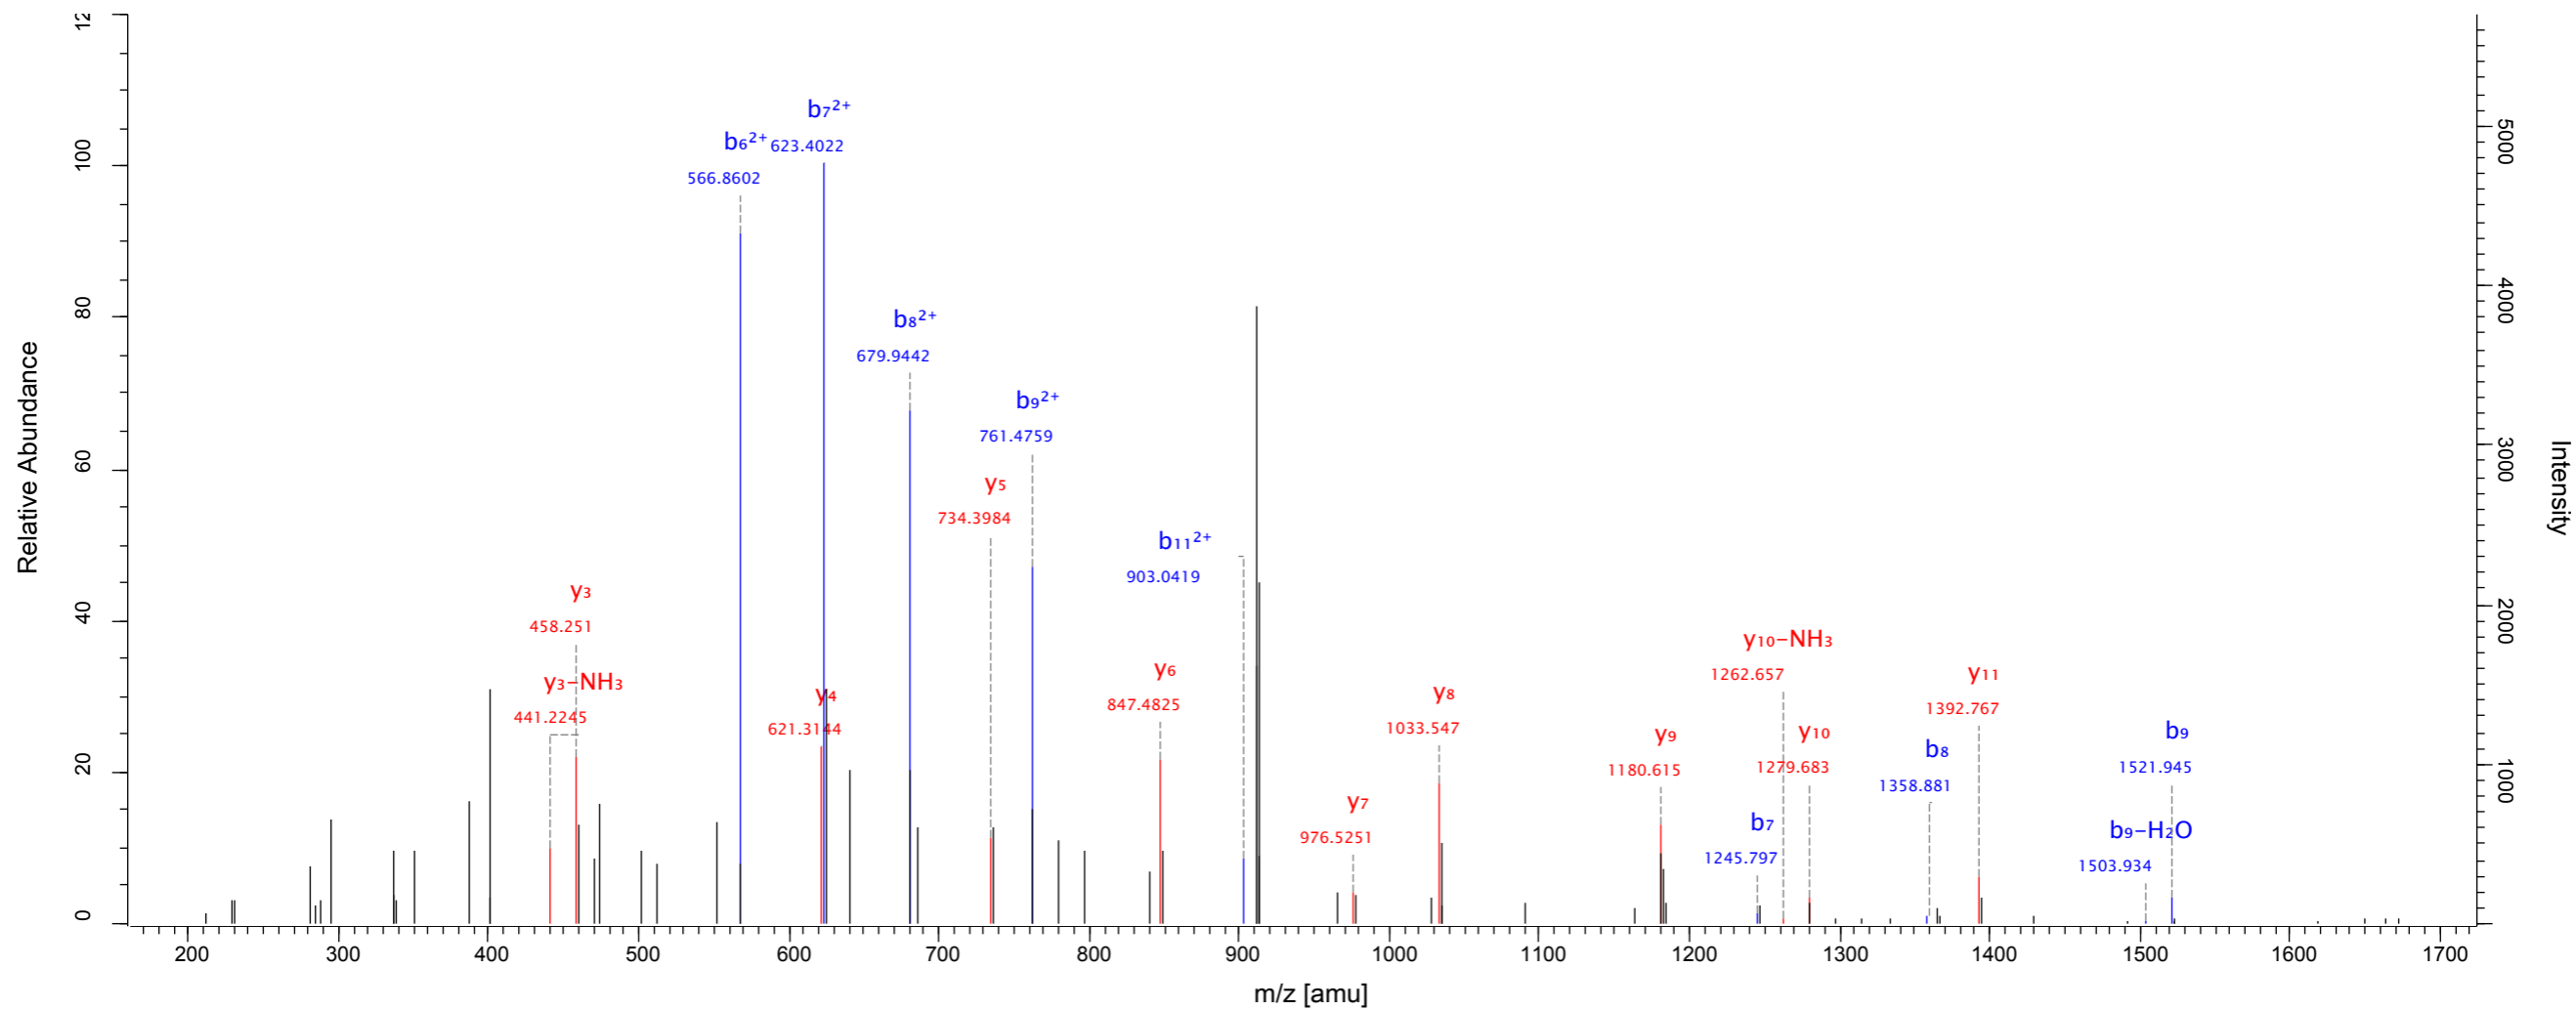



Source: mousePGC-TMT6plex-group1-240ug-205min-39-40

Scannumber: 21301

Protein: Ambra1; Kiaa1736; Ambra1; Kiaa1736; Ambra1; Kiaa1736; Ambra1; Kiaa1736; Ambra1; Kiaa1736; A2AH22-1; A2AH22; A2AH22-6; A2AH22; A2AH22-2; A2AH22; A2AH22-7; A2AH22; A2AH22-5; A2AH22; E9Q961

Peptide Score: 138.87

Method: ITMS; CID; 1

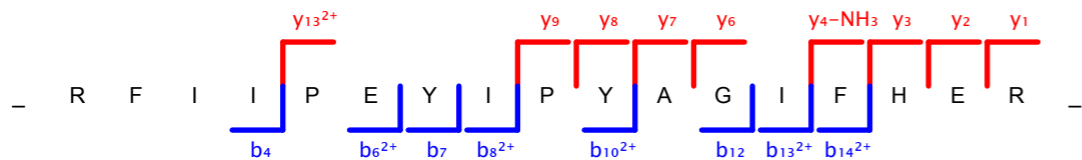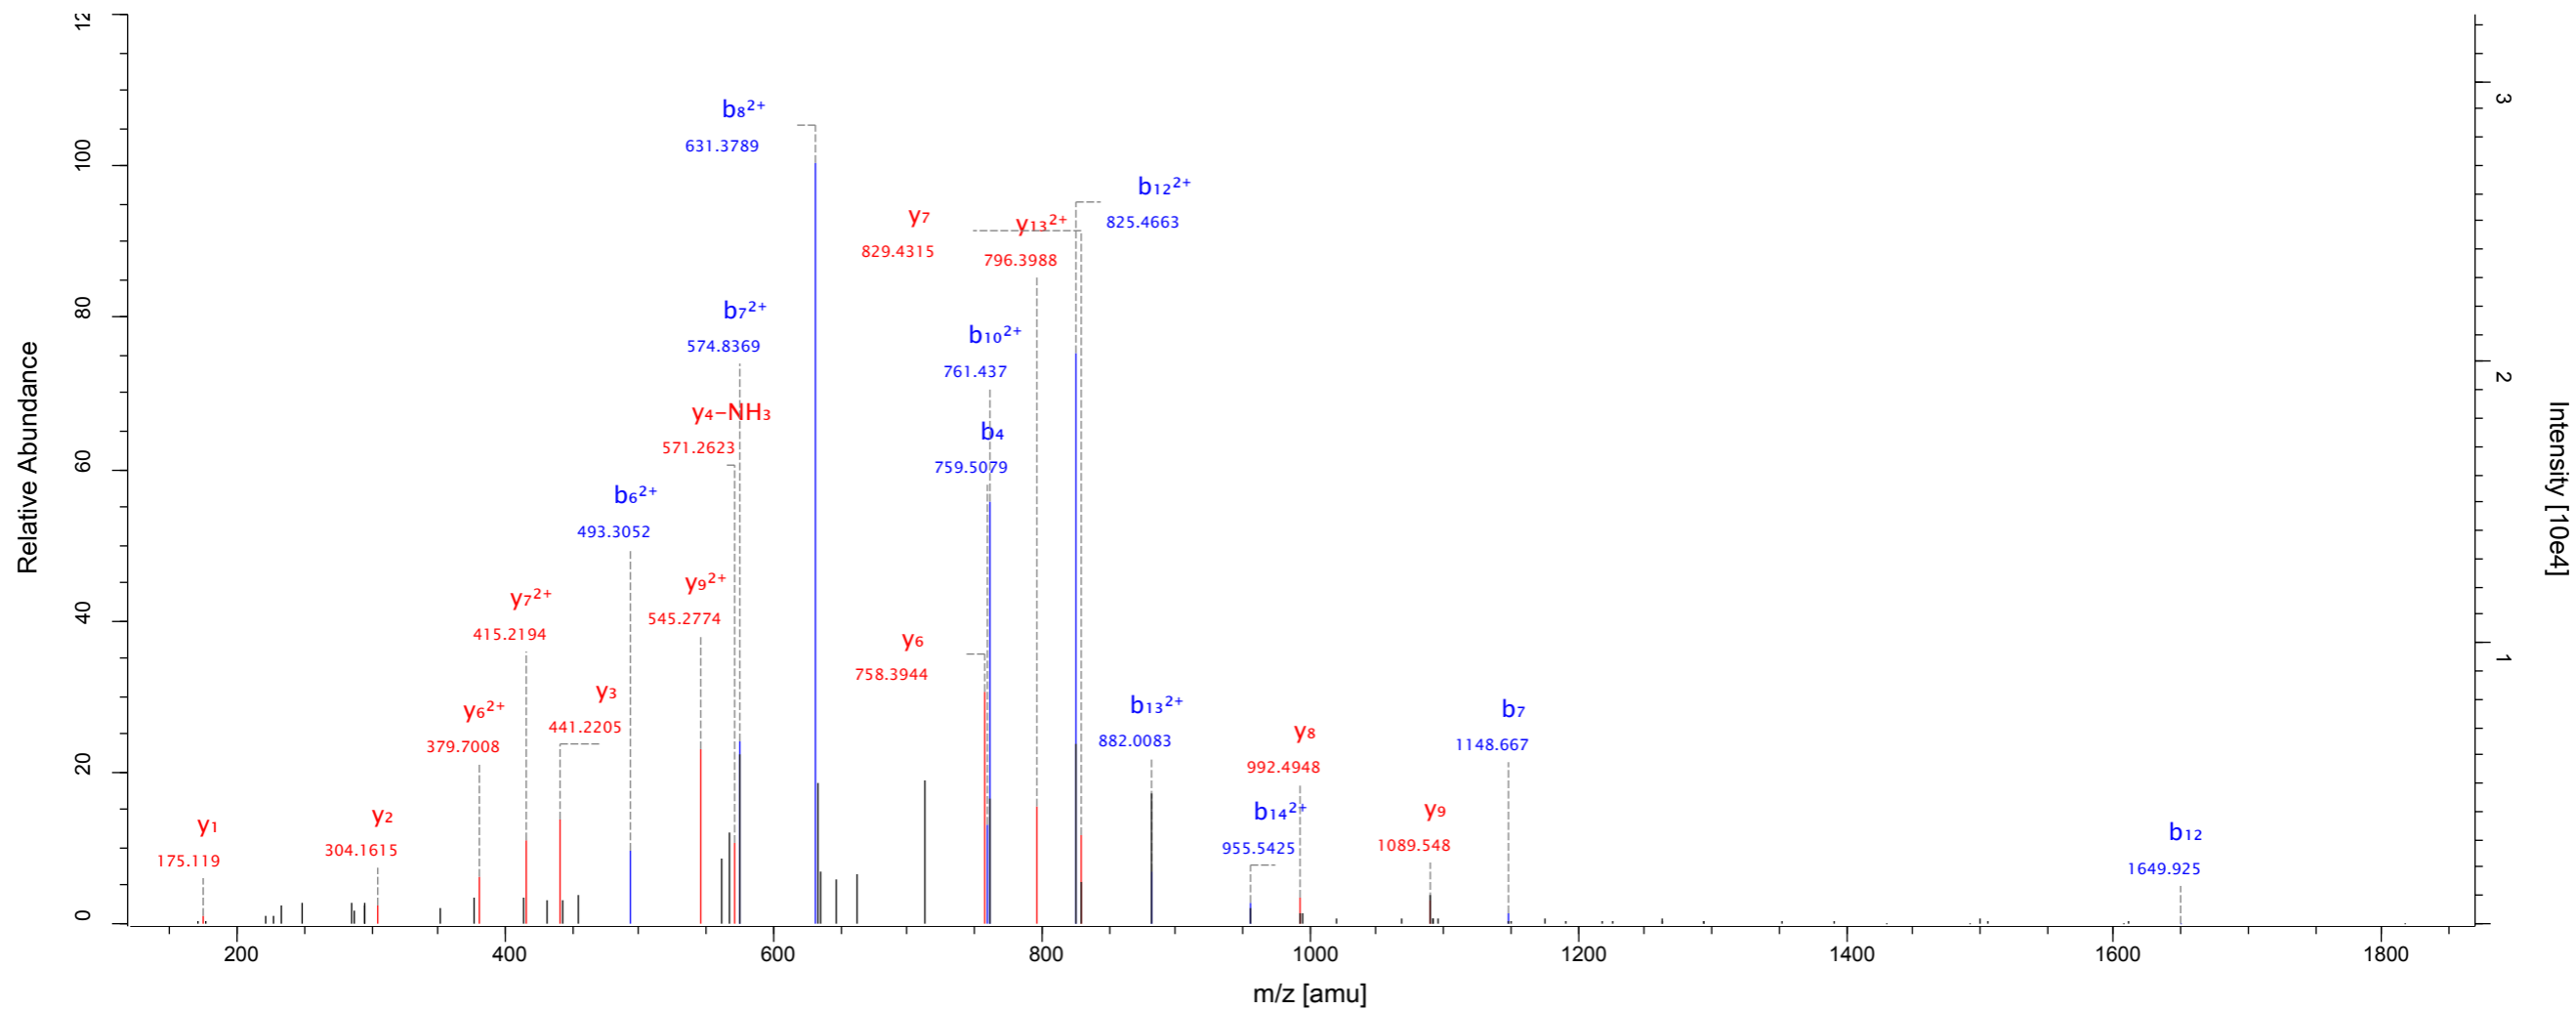

Source: mousePGC-TMT6plex-group1-240ug-205min-39-40  
 Scannumber: 27636  
 Protein: Ndr1; Ndr1; Ndr1; Tdd5; Q62433; B7ZWC0; Q3TD08; Q3TSR4; Q545R3  
 Peptide Score: 202.34  
 Method: ITMS; CID; 1

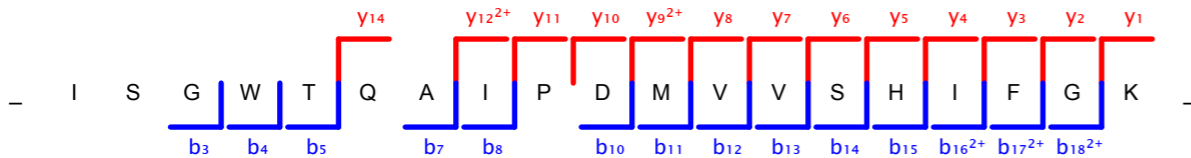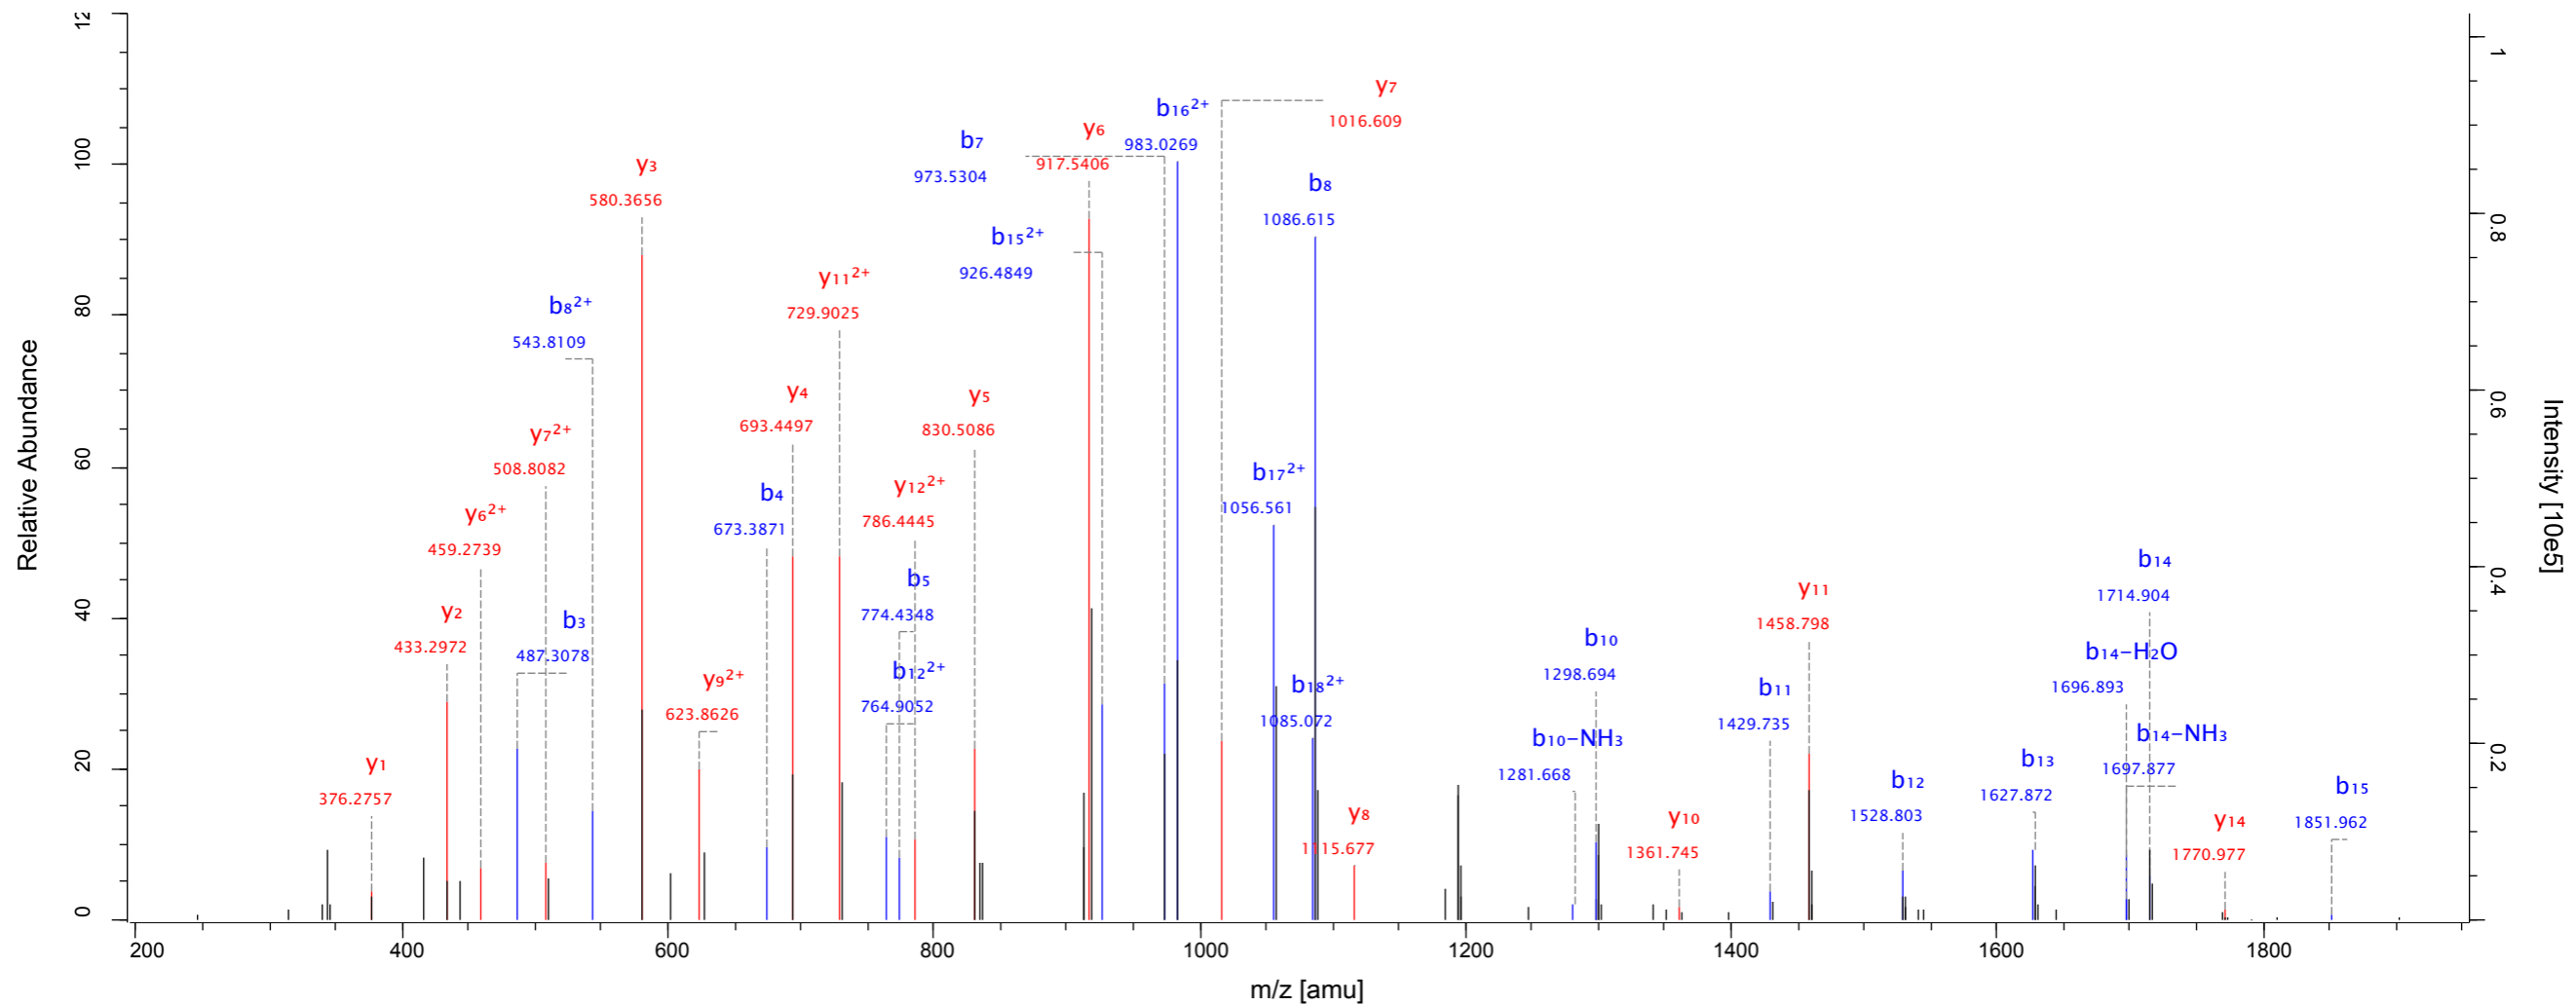

Supplement: 10.1074_M117.066993_mcp.M117.066993-7.pdf [file 10.1074_M117.066993_mcp.M117.066993-7.pdf]
